# Supplementary material for: Long noncoding RNA HOTAIR interacts with Y-Box Protein-1 (YBX1) to regulate cell proliferation
Source: Life Sci Alliance. 2021 Jul 15;4(9):e202101139. doi: 10.26508/lsa.202101139 (PMC8321693; doi:10.26508/lsa.202101139)
Supplement: Supplementary file 2 [file LSA-2021-01139_TableS2.xls]

## Sheet: Sheet2
Table S2 Complete list of identified HOTAIR interacting proteins
Content
HOTAIR-interacting proteins	HOTAIR-interacting proteins determined by SAINTexpress
HOTAIR-1	ChIRP-MS sample 1
HOTAIR-2	ChIRP-MS sample 2
HOTAIR-3	ChIRP-MS sample 3
RNase A-1	ChIRP-MS control 1
RNase A-2	ChIRP-MS control 2
RNase A-3	ChIRP-MS control 3
NP-1	Non-targeting probe control-1
NP-2	Non-targeting probe control-2
NP-3	Non-targeting probe control-3

## Sheet: HOTAIR-interacting proteins
Bait	PreyGene (Accession)	PreyGene (gene name)	HeLa-RBP1	HeLa-RBP2	AP	In the PPI network	Description	Spec	SpecSum	AvgSpec	NumReplicates	ctrlCounts	AvgP	MaxP	TopoAvgP	TopoMaxP	SaintScore	FoldChange	BFDR
HOTAIR	Q06830	PRDX1	√	√	99.8	√	Peroxiredoxin-1	31|43|39	113	37.67	3	0|0|0	1	1	1	1	1	376.67	0
HOTAIR	P10599	TXN	√	√	99.7		Thioredoxin	12|8|6	26	8.67	3	0|0|0	1	1	1	1	1	86.67	0
HOTAIR	P80723	BASP1		√	99.7	√	Brain acid soluble protein 1	7|7|6	20	6.67	3	0|0|0	1	1	1	1	1	66.67	0
HOTAIR	P10809	HSPD1	√	√	99.6		60 kDa heat shock protein, mitochondrial	20|19|19	58	19.33	3	0|0|0	1	1	1	1	1	193.33	0
HOTAIR	P25398	RPS12	√	√	99.5		40S ribosomal protein S12	6|7|6	19	6.33	3	0|0|0	1	1	1	1	1	63.33	0
HOTAIR	P26447	S100A4	√	√	99.5		Protein S100-A4	11|12|12	35	11.67	3	0|0|0	1	1	1	1	1	116.67	0
HOTAIR	P09382	LGALS1	√		99.5		Galectin-1	2|6|6	14	4.67	3	0|0|0	1	1	1	1	1	46.67	0
HOTAIR	P63313	TMSB10			99.5		Thymosin beta-10	3|4|4	11	3.67	3	0|0|0	1	1	1	1	1	36.67	0
HOTAIR	P19338	NCL	√	√	99.4		Nucleolin	9|15|13	37	12.33	3	0|0|0	1	1	1	1	1	123.33	0
HOTAIR	P23396	RPS3	√	√	99.4		40S ribosomal protein S3	9|12|11	32	10.67	3	0|0|0	1	1	1	1	1	106.67	0
HOTAIR	P39019	RPS19		√	99.4		40S ribosomal protein S19	6|5|4	15	5	3	0|0|0	1	1	1	1	1	50	0
HOTAIR	P61247	RPS3A	√	√	99.4		40S ribosomal protein S3a	16|13|11	40	13.33	3	0|0|0	1	1	1	1	1	133.33	0
HOTAIR	Q8WVC2	RPS21	√	√	99.4	√	40S ribosomal protein S21	1|2|2	5	1.67	3	0|0|0	1	1	1	1	1	16.67	0
HOTAIR	P62269	RPS18	√	√	99.3		40S ribosomal protein S18	7|12|13	32	10.67	3	0|0|0	1	1	1	1	1	106.67	0
HOTAIR	P30050	RPL12			99.3		60S ribosomal protein L12	3|1|3	7	2.33	3	0|0|0	1	1	1	1	1	23.33	0
HOTAIR	P62277	RPS13		√	99.2		40S ribosomal protein S13	6|6|6	18	6	3	0|0|0	1	1	1	1	1	60	0
HOTAIR	P62851	RPS25		√	99.2		40S ribosomal protein S25	4|4|4	12	4	3	0|0|0	1	1	1	1	1	40	0
HOTAIR	E5RI99	RPL30	√	√	99.2	√	60S ribosomal protein L30 (Fragment)	3|4|3	10	3.33	3	0|0|0	1	1	1	1	1	33.33	0
HOTAIR	F8W6I7	HNRNPA1	√	√	99.1	√	Heterogeneous nuclear ribonucleoprotein A1	7|9|7	23	7.67	3	0|0|0	1	1	1	1	1	76.67	0
HOTAIR	P15880	RPS2	√	√	99.1		40S ribosomal protein S2	11|8|7	26	8.67	3	0|0|0	1	1	1	1	1	86.67	0
HOTAIR	A0A024R4M0	#N/A	√	√	99.1		40S ribosomal protein S9	10|9|9	28	9.33	3	0|0|0	1	1	1	1	1	93.33	0
HOTAIR	P31949	S100A11			99.1		Protein S100-A11	2|3|2	7	2.33	3	0|0|0	1	1	1	1	1	23.33	0
HOTAIR	P62906	RPL10A	√	√	98.9		60S ribosomal protein L10a	9|7|13	29	9.67	3	0|0|0	1	1	1	1	1	96.67	0
HOTAIR	A0A087WWU8	TPM3			98.9	√	Tropomyosin alpha-3 chain	11|15|11	37	12.33	3	0|0|0	1	1	1	1	1	123.33	0
HOTAIR	H0YMF4	RPL28	√	√	98.8	√	60S ribosomal protein L28	6|4|6	16	5.33	3	0|0|0	1	1	1	1	1	53.33	0
HOTAIR	P04080	CSTB	√	√	98.7		Cystatin-B	4|3|6	13	4.33	3	0|0|0	1	1	1	1	1	43.33	0
HOTAIR	Q9UQ80	PA2G4	√	√	98.7	√	Proliferation-associated protein 2G4	19|13|12	44	14.67	3	0|0|0	1	1	1	1	1	146.67	0
HOTAIR	K7ELW0	PARK7			98.7	√	Protein/nucleic acid deglycase DJ-1	15|14|15	44	14.67	3	0|0|0	1	1	1	1	1	146.67	0
HOTAIR	A0A2R8Y6J3	RPL5	√	√	98.6	√	60S ribosomal protein L5 (Fragment)	15|12|16	43	14.33	3	0|0|0	1	1	1	1	1	143.33	0
HOTAIR	P32119	PRDX2		√	98.5	√	Peroxiredoxin-2	3|9|10	22	7.33	3	0|0|0	1	1	1	1	1	73.33	0
HOTAIR	P49207	RPL34		√	98.5		60S ribosomal protein L34	2|4|2	8	2.67	3	0|0|0	1	1	1	1	1	26.67	0
HOTAIR	H0YHA7	RPL18		√	98.5	√	60S ribosomal protein L18 (Fragment)	14|10|9	33	11	3	0|0|0	1	1	1	1	1	110	0
HOTAIR	M0R3D6	RPL18A	√	√	98.2	√	60S ribosomal protein L18a (Fragment)	6|5|8	19	6.33	3	0|0|0	1	1	1	1	1	63.33	0
HOTAIR	Q9Y3U8	RPL36	√		98.2		60S ribosomal protein L36	6|5|5	16	5.33	3	0|0|0	1	1	1	1	1	53.33	0
HOTAIR	H0YA96	HNRNPD	√	√	98.1	√	Heterogeneous nuclear ribonucleoprotein D0 (Fragment)	9|12|4	25	8.33	3	0|0|0	1	1	1	1	1	83.33	0
HOTAIR	Q8NC51	SERBP1	√	√	98.1		Plasminogen activator inhibitor 1 RNA-binding protein	4|6|3	13	4.33	3	0|0|0	1	1	1	1	1	43.33	0
HOTAIR	P68133	ACTA1			98.1		Actin, alpha skeletal muscle	8|11|15	34	11.33	3	0|0|0	1	1	1	1	1	113.33	0
HOTAIR	P06576	ATP5F1B			98.1		ATP synthase subunit beta, mitochondrial	16|17|14	47	15.67	3	0|0|0	1	1	1	1	1	156.67	0
HOTAIR	P08708	RPS17	√	√	97.9		40S ribosomal protein S17	3|4|4	11	3.67	3	0|0|0	1	1	1	1	1	36.67	0
HOTAIR	E9PLL6	RPL27A		√	97.9	√	60S ribosomal protein L27a	5|6|6	17	5.67	3	0|0|0	1	1	1	1	1	56.67	0
HOTAIR	P30086	PEBP1	√	√	97.7	√	Phosphatidylethanolamine-binding protein 1	11|12|11	34	11.33	3	0|0|0	1	1	1	1	1	113.33	0
HOTAIR	P40429	RPL13A	√	√	97.7		60S ribosomal protein L13a	10|9|13	32	10.67	3	0|0|0	1	1	1	1	1	106.67	0
HOTAIR	P84077	ARF1		√	97.7	√	ADP-ribosylation factor 1	5|10|9	24	8	3	0|0|0	1	1	1	1	1	80	0
HOTAIR	P21796	VDAC1		√	97.6	√	Voltage-dependent anion-selective channel protein 1	15|15|18	48	16	3	0|0|0	1	1	1	1	1	160	0
HOTAIR	Q99832	CCT7			97.6		T-complex protein 1 subunit eta	13|10|9	32	10.67	3	0|0|0	1	1	1	1	1	106.67	0
HOTAIR	P60981	DSTN			97.6		Destrin	7|10|12	29	9.67	3	0|0|0	1	1	1	1	1	96.67	0
HOTAIR	A6NLN1	PTBP1	√	√	97.5	√	Polypyrimidine tract binding protein 1, isoform CRA_b	3|3|3	9	3	3	0|0|0	1	1	1	1	1	30	0
HOTAIR	P40227	CCT6A	√		97.5		T-complex protein 1 subunit zeta	10|8|10	28	9.33	3	0|0|0	1	1	1	1	1	93.33	0
HOTAIR	E5RIW3	TBCA			97.5		Tubulin-specific chaperone A	3|3|3	9	3	3	0|0|0	1	1	1	1	1	30	0
HOTAIR	P29966	MARCKS		√	97.4		Myristoylated alanine-rich C-kinase substrate	2|3|4	9	3	3	0|0|0	1	1	1	1	1	30	0
HOTAIR	P13693	TPT1	√		97.4		Translationally-controlled tumor protein	10|10|8	28	9.33	3	0|0|0	1	1	1	1	1	93.33	0
HOTAIR	B4DLR8	NQO1	√		97.4	√	NAD(P)H dehydrogenase [quinone] 1	12|8|10	30	10	3	0|0|0	1	1	1	1	1	100	0
HOTAIR	P07108	DBI			97.4		Acyl-CoA-binding protein	2|2|2	6	2	3	0|0|0	1	1	1	1	1	20	0
HOTAIR	E9PBS1	PAICS			97.4	√	Multifunctional protein ADE2 (Fragment)	3|4|5	12	4	3	0|0|0	1	1	1	1	1	40	0
HOTAIR	P20290	BTF3	√	√	97.3	√	Transcription factor BTF3	4|2|2	8	2.67	3	0|0|0	1	1	1	1	1	26.67	0
HOTAIR	P67809	YBX1	√	√	97.3	√	Nuclease-sensitive element-binding protein 1	4|7|6	17	5.67	3	0|0|0	1	1	1	1	1	56.67	0
HOTAIR	O75874	IDH1			97.3		Isocitrate dehydrogenase [NADP] cytoplasmic	12|15|11	38	12.67	3	0|0|0	1	1	1	1	1	126.67	0
HOTAIR	P61088	UBE2N			97.3	√	Ubiquitin-conjugating enzyme E2 N	10|11|11	32	10.67	3	0|0|0	1	1	1	1	1	106.67	0
HOTAIR	P62753	RPS6	√	√	97.2		40S ribosomal protein S6	8|5|8	21	7	3	0|0|0	1	1	1	1	1	70	0
HOTAIR	Q13185	CBX3			97.2	√	Chromobox protein homolog 3	3|6|5	14	4.67	3	0|0|0	1	1	1	1	1	46.67	0
HOTAIR	P12277	CKB			97.2		Creatine kinase B-type	7|8|8	23	7.67	3	0|0|0	1	1	1	1	1	76.67	0
HOTAIR	Q9Y3F4	STRAP	√	√	97	√	Serine-threonine kinase receptor-associated protein	4|9|9	22	7.33	3	0|0|0	1	1	1	1	1	73.33	0
HOTAIR	C9J9W2	LASP1			97	√	LIM and SH3 domain protein 1 (Fragment)	4|5|5	14	4.67	3	0|0|0	1	1	1	1	1	46.67	0
HOTAIR	P60900	PSMA6			97		Proteasome subunit alpha type-6	16|16|18	50	16.67	3	0|0|0	1	1	1	1	1	166.67	0
HOTAIR	P23526	AHCY			96.9		Adenosylhomocysteinase	6|4|7	17	5.67	3	0|0|0	1	1	1	1	1	56.67	0
HOTAIR	P54577	YARS1	√	√	96.8		Tyrosine--tRNA ligase, cytoplasmic	4|3|4	11	3.67	3	0|0|0	1	1	1	1	1	36.67	0
HOTAIR	E9PC52	RBBP7			96.8	√	Histone-binding protein RBBP7	3|6|7	16	5.33	3	0|0|0	1	1	1	1	1	53.33	0
HOTAIR	Q06323	PSME1			96.8	√	Proteasome activator complex subunit 1	2|3|3	8	2.67	3	0|0|0	1	1	1	1	1	26.67	0
HOTAIR	P25788	PSMA3			96.7		Proteasome subunit alpha type-3	11|15|10	36	12	3	0|0|0	1	1	1	1	1	120	0
HOTAIR	O43399	TPD52L2	√		96.6		Tumor protein D54	6|10|8	24	8	3	0|0|0	1	1	1	1	1	80	0
HOTAIR	P15121	AKR1B1			96.6		Aldo-keto reductase family 1 member B1	3|2|5	10	3.33	3	0|0|0	1	1	1	1	1	33.33	0
HOTAIR	J3KTF8	ARHGDIA			96.6	√	Rho GDP-dissociation inhibitor 1 (Fragment)	9|9|12	30	10	3	0|0|0	1	1	1	1	1	100	0
HOTAIR	P20042	EIF2S2	√	√	96.4		Eukaryotic translation initiation factor 2 subunit 2	3|5|2	10	3.33	3	0|0|0	1	1	1	1	1	33.33	0
HOTAIR	P00505	GOT2			96.4		Aspartate aminotransferase, mitochondrial	7|7|9	23	7.67	3	0|0|0	1	1	1	1	1	76.67	0
HOTAIR	P51149	RAB7A			96.4	√	Ras-related protein Rab-7a	8|12|13	33	11	3	0|0|0	1	1	1	1	1	110	0
HOTAIR	E7EQR4	EZR	√	√	96.3	√	Ezrin	14|10|11	35	11.67	3	0|0|0	1	1	1	1	1	116.67	0
HOTAIR	J3QLI9	SNRPD1	√	√	96.3	√	Small nuclear ribonucleoprotein Sm D1	2|2|2	6	2	3	0|0|0	1	1	1	1	1	20	0
HOTAIR	B1AHC9	XRCC6	√	√	96.3	√	X-ray repair cross-complementing protein 6	2|2|1	5	1.67	3	0|0|0	1	1	1	1	1	16.67	0
HOTAIR	H0YN26	ANP32A			96.3	√	Acidic leucine-rich nuclear phosphoprotein 32 family member A	11|13|12	36	12	3	0|0|0	1	1	1	1	1	120	0
HOTAIR	P07741	APRT			96.3		Adenine phosphoribosyltransferase	13|14|14	41	13.67	3	0|0|0	1	1	1	1	1	136.67	0
HOTAIR	O75822	EIF3J		√	96.2	√	Eukaryotic translation initiation factor 3 subunit J	2|5|2	9	3	3	0|0|0	1	1	1	1	1	30	0
HOTAIR	P13797	PLS3		√	96.2		Plastin-3	27|21|27	75	25	3	0|0|0	1	1	1	1	1	250	0
HOTAIR	P41091	EIF2S3			96.2		Eukaryotic translation initiation factor 2 subunit 3	12|12|12	36	12	3	0|0|0	1	1	1	1	1	120	0
HOTAIR	H0YHC3	NAP1L1			96.1	√	Nucleosome assembly protein 1-like 1 (Fragment)	3|8|10	21	7	3	0|0|0	1	1	1	1	1	70	0
HOTAIR	P55327	TPD52			96.1	√	Tumor protein D52	4|10|7	21	7	3	0|0|0	1	1	1	1	1	70	0
HOTAIR	F8VX11	EIF4B	√	√	96	√	Eukaryotic translation initiation factor 4B (Fragment)	4|3|3	10	3.33	3	0|0|0	1	1	1	1	1	33.33	0
HOTAIR	B4DY09	ILF2	√	√	96	√	Interleukin enhancer-binding factor 2	2|2|2	6	2	3	0|0|0	1	1	1	1	1	20	0
HOTAIR	Q15056	EIF4H	√	√	96		Eukaryotic translation initiation factor 4H	2|4|4	10	3.33	3	0|0|0	1	1	1	1	1	33.33	0
HOTAIR	P61586	RHOA			96	√	Transforming protein RhoA	8|6|13	27	9	3	0|0|0	1	1	1	1	1	90	0
HOTAIR	P82979	SARNP	√	√	95.9	√	SAP domain-containing ribonucleoprotein	3|2|2	7	2.33	3	0|0|0	1	1	1	1	1	23.33	0
HOTAIR	Q96AG4	LRRC59	√	√	95.9		Leucine-rich repeat-containing protein 59	2|5|3	10	3.33	3	0|0|0	1	1	1	1	1	33.33	0
HOTAIR	P35613	BSG			95.9		Basigin	13|7|9	29	9.67	3	0|0|0	1	1	1	1	1	96.67	0
HOTAIR	P52209	PGD			95.9		6-phosphogluconate dehydrogenase, decarboxylating	4|3|3	10	3.33	3	0|0|0	1	1	1	1	1	33.33	0
HOTAIR	P07814	EPRS1		√	95.8		Bifunctional glutamate/proline--tRNA ligase	8|4|2	14	4.67	3	0|0|0	1	1	1	1	1	46.67	0
HOTAIR	P09874	PARP1	√	√	95.8	√	Poly [ADP-ribose] polymerase 1	3|3|2	8	2.67	3	0|0|0	1	1	1	1	1	26.67	0
HOTAIR	P11766	ADH5			95.8		Alcohol dehydrogenase class-3	3|3|4	10	3.33	3	0|0|0	1	1	1	1	1	33.33	0
HOTAIR	P61019	RAB2A			95.8	√	Ras-related protein Rab-2A	11|5|13	29	9.67	3	0|0|0	1	1	1	1	1	96.67	0
HOTAIR	H3BPC4	UBE2I	√		95.7	√	SUMO-conjugating enzyme UBC9 (Fragment)	3|3|2	8	2.67	3	0|0|0	1	1	1	1	1	26.67	0
HOTAIR	P53396	ACLY			95.7	√	ATP-citrate synthase	9|4|3	16	5.33	3	0|0|0	1	1	1	1	1	53.33	0
HOTAIR	Q04760	GLO1			95.7		Lactoylglutathione lyase	7|10|8	25	8.33	3	0|0|0	1	1	1	1	1	83.33	0
HOTAIR	P17931	LGALS3	√		95.5		Galectin-3	7|7|5	19	6.33	3	0|0|0	1	1	1	1	1	63.33	0
HOTAIR	P55060	CSE1L			95.4		Exportin-2	12|13|11	36	12	3	0|0|0	1	1	1	1	1	120	0
HOTAIR	Q15293	RCN1			95.4	√	Reticulocalbin-1	9|8|6	23	7.67	3	0|0|0	1	1	1	1	1	76.67	0
HOTAIR	P30044	PRDX5			95.3	√	Peroxiredoxin-5, mitochondrial	6|9|9	24	8	3	0|0|0	1	1	1	1	1	80	0
HOTAIR	P14314	PRKCSH			95.3		Glucosidase 2 subunit beta	21|20|19	60	20	3	0|0|0	1	1	1	1	1	200	0
HOTAIR	P60953	CDC42			95.2	√	Cell division control protein 42 homolog	6|5|7	18	6	3	0|0|0	1	1	1	1	1	60	0
HOTAIR	P20618	PSMB1			95.2		Proteasome subunit beta type-1	15|19|17	51	17	3	0|0|0	1	1	1	1	1	170	0
HOTAIR	Q04917	YWHAH			95.2		14-3-3 protein zeta	7|8|9	24	8	3	0|0|0	1	1	1	1	1	80	0
HOTAIR	P36871	PGM1			95.1	√	Phosphoglucomutase-1	16|14|18	48	16	3	0|0|0	1	1	1	1	1	160	0
HOTAIR	P05455	SSB	√	√	95		Lupus La protein	15|17|17	49	16.33	3	0|0|0	1	1	1	1	1	163.33	0
HOTAIR	P30046	DDT			95		D-dopachrome decarboxylase	6|10|7	23	7.67	3	0|0|0	1	1	1	1	1	76.67	0
HOTAIR	P49721	PSMB2			95		Proteasome subunit beta type-2	7|9|6	22	7.33	3	0|0|0	1	1	1	1	1	73.33	0
HOTAIR	O43852	CALU		√	94.9	√	Calumenin	9|15|15	39	13	3	0|0|0	1	1	1	1	1	130	0
HOTAIR	P10606	COX5B			94.9	√	Cytochrome c oxidase subunit 5B, mitochondrial	6|2|2	10	3.33	3	0|0|0	1	1	1	1	1	33.33	0
HOTAIR	P49189	ALDH9A1			94.9		4-trimethylaminobutyraldehyde dehydrogenase	10|4|9	23	7.67	3	0|0|0	1	1	1	1	1	76.67	0
HOTAIR	O60664	PLIN3		√	94.8	√	Perilipin-3	16|16|19	51	17	3	0|0|0	1	1	1	1	1	170	0
HOTAIR	A0A024QZP7	CDK1			94.8	√	Cell division cycle 2, G1 to S and G2 to M, isoform CRA_a	7|8|9	24	8	3	0|0|0	1	1	1	1	1	80	0
HOTAIR	Q08J23	NSUN2	√	√	94.6	√	tRNA (cytosine(34)-C(5))-methyltransferase	12|11|15	38	12.67	3	0|0|0	1	1	1	1	1	126.67	0
HOTAIR	Q15691	MAPRE1		√	94.6		Microtubule-associated protein RP/EB family member 1	10|10|9	29	9.67	3	0|0|0	1	1	1	1	1	96.67	0
HOTAIR	E9PGT1	TSN		√	94.5	√	Translin	13|10|11	34	11.33	3	0|0|0	1	1	1	1	1	113.33	0
HOTAIR	Q32Q12	NME1-NME2	√		94.5		Nucleoside diphosphate kinase	29|30|25	84	28	3	0|0|0	1	1	1	1	1	280	0
HOTAIR	P61106	RAB14			94.5	√	Ras-related protein Rab-14	13|10|11	34	11.33	3	0|0|0	1	1	1	1	1	113.33	0
HOTAIR	P04843	RPN1	√	√	94.4	√	Dolichyl-diphosphooligosaccharide--protein glycosyltransferase subunit 1	2|1|3	6	2	3	0|0|0	1	1	1	1	1	20	0
HOTAIR	Q13283	G3BP1	√	√	94.4	√	Ras GTPase-activating protein-binding protein 1	4|2|3	9	3	3	0|0|0	1	1	1	1	1	30	0
HOTAIR	Q15046	KARS1		√	94.3		Lysine--tRNA ligase	3|4|5	12	4	3	0|0|0	1	1	1	1	1	40	0
HOTAIR	P14324	FDPS	√		94.3		Farnesyl pyrophosphate synthase	13|14|17	44	14.67	3	0|0|0	1	1	1	1	1	146.67	0
HOTAIR	Q9Y2B0	CNPY2			94.2	√	Protein canopy homolog 2	2|3|1	6	2	3	0|0|0	1	1	1	1	1	20	0
HOTAIR	P51571	SSR4			94.2		Translocon-associated protein subunit delta	1|5|6	12	4	3	0|0|0	1	1	1	1	1	40	0
HOTAIR	H3BR35	GSPT1	√	√	94.1	√	Eukaryotic peptide chain release factor GTP-binding subunit ERF3A (Fragment)	3|2|4	9	3	3	0|0|0	1	1	1	1	1	30	0
HOTAIR	O00231	PSMD11			94		26S proteasome non-ATPase regulatory subunit 11	10|13|9	32	10.67	3	0|0|0	1	1	1	1	1	106.67	0
HOTAIR	F8VS07	LIMA1		√	93.9	√	LIM domain and actin-binding protein 1	2|1|3	6	2	3	0|0|0	1	1	1	1	1	20	0
HOTAIR	Q7KZF4	SND1	√	√	93.9	√	Staphylococcal nuclease domain-containing protein 1	3|2|3	8	2.67	3	0|0|0	1	1	1	1	1	26.67	0
HOTAIR	Q92688	ANP32B			93.9		Acidic leucine-rich nuclear phosphoprotein 32 family member B	15|12|10	37	12.33	3	0|0|0	1	1	1	1	1	123.33	0
HOTAIR	P49321	NASP		√	93.8	√	Nuclear autoantigenic sperm protein	16|17|17	50	16.67	3	0|0|0	1	1	1	1	1	166.67	0
HOTAIR	O95433	AHSA1			93.8	√	Activator of 90 kDa heat shock protein ATPase homolog 1	8|9|8	25	8.33	3	0|0|0	1	1	1	1	1	83.33	0
HOTAIR	B4DFG0	DEK	√	√	93.7	√	Protein DEK	3|3|3	9	3	3	0|0|0	1	1	1	1	1	30	0
HOTAIR	Q13404	UBE2V1			93.6		Ubiquitin-conjugating enzyme E2 variant 1	7|9|9	25	8.33	3	0|0|0	1	1	1	1	1	83.33	0
HOTAIR	Q9UBE0	SAE1			93.5	√	SUMO-activating enzyme subunit 1	8|11|6	25	8.33	3	0|0|0	1	1	1	1	1	83.33	0
HOTAIR	P49755	TMED10			93.5		Transmembrane emp24 domain-containing protein 10	10|8|12	30	10	3	0|0|0	1	1	1	1	1	100	0
HOTAIR	C9JFR7	CYCS			93.4	√	Cytochrome c (Fragment)	4|7|7	18	6	3	0|0|0	1	1	1	1	1	60	0
HOTAIR	Q99436	PSMB7			93.4		Proteasome subunit beta type-7	10|7|8	25	8.33	3	0|0|0	1	1	1	1	1	83.33	0
HOTAIR	I3L4I0	FLYWCH2	√	√	93.3		FLYWCH family member 2 (Fragment)	2|2|1	5	1.67	3	0|0|0	1	1	1	1	1	16.67	0
HOTAIR	P52907	CAPZA1			93.3		F-actin-capping protein subunit alpha-1	10|15|12	37	12.33	3	0|0|0	1	1	1	1	1	123.33	0
HOTAIR	P20674	COX5A			93.3	√	Cytochrome c oxidase subunit 5A, mitochondrial	3|5|3	11	3.67	3	0|0|0	1	1	1	1	1	36.67	0
HOTAIR	Q86VP6	CAND1			93.1	√	Cullin-associated NEDD8-dissociated protein 1	4|5|6	15	5	3	0|0|0	1	1	1	1	1	50	0
HOTAIR	P62333	PSMC6			93.1		26S proteasome regulatory subunit 10B	7|8|9	24	8	3	0|0|0	1	1	1	1	1	80	0
HOTAIR	Q5T0D2	CMPK1			93.1	√	UMP-CMP kinase	2|4|4	10	3.33	3	0|0|0	1	1	1	1	1	33.33	0
HOTAIR	P49591	SARS1		√	93		Serine--tRNA ligase, cytoplasmic	6|4|4	14	4.67	3	0|0|0	1	1	1	1	1	46.67	0
HOTAIR	P49915	GMPS		√	92.9		GMP synthase [glutamine-hydrolyzing]	9|5|5	19	6.33	3	0|0|0	1	1	1	1	1	63.33	0
HOTAIR	P40121	CAPG			92.9	√	Macrophage-capping protein	5|6|9	20	6.67	3	0|0|0	1	1	1	1	1	66.67	0
HOTAIR	P54578	USP14			92.9		Ubiquitin carboxyl-terminal hydrolase 14	12|11|9	32	10.67	3	0|0|0	1	1	1	1	1	106.67	0
HOTAIR	Q6NZI2	CAVIN1	√		92.8		Caveolae-associated protein 1	2|2|4	8	2.67	3	0|0|0	1	1	1	1	1	26.67	0
HOTAIR	P55884	EIF3B		√	92.7	√	Eukaryotic translation initiation factor 3 subunit B	2|3|3	8	2.67	3	0|0|0	1	1	1	1	1	26.67	0
HOTAIR	Q16543	CDC37		√	92.7	√	Hsp90 co-chaperone Cdc37	7|6|6	19	6.33	3	0|0|0	1	1	1	1	1	63.33	0
HOTAIR	P00387	CYB5R3			92.6		NADH-cytochrome b5 reductase 3	10|10|11	31	10.33	3	0|0|0	1	1	1	1	1	103.33	0
HOTAIR	P28070	PSMB4			92.6		Proteasome subunit beta type-4	6|7|7	20	6.67	3	0|0|0	1	1	1	1	1	66.67	0
HOTAIR	J3KNQ3	PSMD13			92.6	√	26S proteasome non-ATPase regulatory subunit 13	3|3|8	14	4.67	3	0|0|0	1	1	1	1	1	46.67	0
HOTAIR	A0A0A0MSW4	PITPNB			92.6	√	Phosphatidylinositol transfer protein beta isoform	3|3|3	9	3	3	0|0|0	1	1	1	1	1	30	0
HOTAIR	P12429	ANXA3			92.5		Annexin A3	11|22|19	52	17.33	3	0|0|0	1	1	1	1	1	173.33	0
HOTAIR	Q9NUQ9	CYRIB			92.5		Protein FAM49B	2|2|2	6	2	3	0|0|0	1	1	1	1	1	20	0
HOTAIR	O43242	PSMD3			92.5	√	26S proteasome non-ATPase regulatory subunit 3	4|5|6	15	5	3	0|0|0	1	1	1	1	1	50	0
HOTAIR	P54136	RARS1		√	92.4		Arginine--tRNA ligase, cytoplasmic	10|9|11	30	10	3	0|0|0	1	1	1	1	1	100	0
HOTAIR	P08133	ANXA6			92.4	√	Annexin A6	22|21|18	61	20.33	3	0|0|0	1	1	1	1	1	203.33	0
HOTAIR	O14745	SLC9A3R1		√	92.3		Na(+)/H(+) exchange regulatory cofactor NHE-RF1	5|4|4	13	4.33	3	0|0|0	1	1	1	1	1	43.33	0
HOTAIR	O95373	IPO7		√	92.3	√	Importin-7	14|12|7	33	11	3	0|0|0	1	1	1	1	1	110	0
HOTAIR	O43143	DHX15	√	√	92.1	√	Pre-mRNA-splicing factor ATP-dependent RNA helicase DHX15	1|2|3	6	2	3	0|0|0	1	1	1	1	1	20	0
HOTAIR	P62195	PSMC5			92.1		26S proteasome regulatory subunit 8	9|7|7	23	7.67	3	0|0|0	1	1	1	1	1	76.67	0
HOTAIR	P35241	RDX	√	√	92		Radixin	5|2|6	13	4.33	3	0|0|0	1	1	1	1	1	43.33	0
HOTAIR	P62191	PSMC1	√		92		26S proteasome regulatory subunit 4	8|7|6	21	7	3	0|0|0	1	1	1	1	1	70	0
HOTAIR	Q96QK1	VPS35			92	√	Vacuolar protein sorting-associated protein 35	2|2|1	5	1.67	3	0|0|0	1	1	1	1	1	16.67	0
HOTAIR	P30043	BLVRB			91.9	√	Flavin reductase (NADPH)	9|9|6	24	8	3	0|0|0	1	1	1	1	1	80	0
HOTAIR	O95336	PGLS			91.9		6-phosphogluconolactonase	14|18|15	47	15.67	3	0|0|0	1	1	1	1	1	156.67	0
HOTAIR	Q5TD07	NQO2			91.9		Ribosyldihydronicotinamide dehydrogenase [quinone]	3|7|5	15	5	3	0|0|0	1	1	1	1	1	50	0
HOTAIR	Q96C19	EFHD2		√	91.8		EF-hand domain-containing protein D2	3|4|5	12	4	3	0|0|0	1	1	1	1	1	40	0
HOTAIR	H0YM70	PSME2			91.8	√	Proteasome activator complex subunit 2	4|6|2	12	4	3	0|0|0	1	1	1	1	1	40	0
HOTAIR	Q92973	TNPO1	√	√	91.7	√	Transportin-1	2|3|2	7	2.33	3	0|0|0	1	1	1	1	1	23.33	0
HOTAIR	Q99733	NAP1L4	√	√	91.7		Nucleosome assembly protein 1-like 4	11|16|11	38	12.67	3	0|0|0	1	1	1	1	1	126.67	0
HOTAIR	P00568	AK1			91.7		Adenylate kinase isoenzyme 1	3|3|3	9	3	3	0|0|0	1	1	1	1	1	30	0
HOTAIR	A0A3B3IRI2	CTPS1			91.7	√	CTP synthase	6|4|5	15	5	3	0|0|0	1	1	1	1	1	50	0
HOTAIR	P04632	CAPNS1			91.6		Calpain small subunit 1	15|23|19	57	19	3	0|0|0	1	1	1	1	1	190	0
HOTAIR	P30740	SERPINB1			91.5		Leukocyte elastase inhibitor	8|10|12	30	10	3	0|0|0	1	1	1	1	1	100	0
HOTAIR	Q9Y5M8	SRPRB			91.4	√	Signal recognition particle receptor subunit beta	3|6|4	13	4.33	3	0|0|0	1	1	1	1	1	43.33	0
HOTAIR	P14550	AKR1A1			91.4		Aldo-keto reductase family 1 member A1	3|2|5	10	3.33	3	0|0|0	1	1	1	1	1	33.33	0
HOTAIR	P54709	ATP1B3			91.4		Sodium/potassium-transporting ATPase subunit beta-3	9|9|6	24	8	3	0|0|0	1	1	1	1	1	80	0
HOTAIR	Q969H8	MYDGF			91.3	√	Myeloid-derived growth factor	12|9|10	31	10.33	3	0|0|0	1	1	1	1	1	103.33	0
HOTAIR	P45974	USP5			91.2		Ubiquitin carboxyl-terminal hydrolase 5	2|5|3	10	3.33	3	0|0|0	1	1	1	1	1	33.33	0
HOTAIR	P04899	GNAI2		√	91.1	√	Guanine nucleotide-binding protein G(i) subunit alpha-2	6|4|7	17	5.67	3	0|0|0	1	1	1	1	1	56.67	0
HOTAIR	E7EX73	EIF4G1	√	√	91	√	Eukaryotic translation initiation factor 4 gamma 1	4|5|3	12	4	3	0|0|0	1	1	1	1	1	40	0
HOTAIR	F2Z3J9	PTGR1			91	√	Prostaglandin reductase 1	3|8|7	18	6	3	0|0|0	1	1	1	1	1	60	0
HOTAIR	Q8NBY1	STK26			90.8	√	Serine/threonine-protein kinase 26	4|4|1	9	3	3	0|0|0	1	1	1	1	1	30	0
HOTAIR	P12814	ACTN1			90.6	√	Alpha-actinin-1	11|9|13	33	11	3	0|0|0	1	1	1	1	1	110	0
HOTAIR	A0A0B4J1W3	NAA15	√	√	90.5	√	N-alpha-acetyltransferase 15, NatA auxiliary subunit	4|3|4	11	3.67	3	0|0|0	1	1	1	1	1	36.67	0
HOTAIR	O15355	PPM1G		√	90.5	√	Protein phosphatase 1G	4|4|4	12	4	3	0|0|0	1	1	1	1	1	40	0
HOTAIR	H0YD13	CD44		√	90.2	√	CD44 antigen	8|5|4	17	5.67	3	0|0|0	1	1	1	1	1	56.67	0
HOTAIR	O00232	PSMD12			90.1		26S proteasome non-ATPase regulatory subunit 12	5|3|5	13	4.33	3	0|0|0	1	1	1	1	1	43.33	0
HOTAIR	Q9UBT2	UBA2			90.1		SUMO-activating enzyme subunit 2	14|16|17	47	15.67	3	0|0|0	1	1	1	1	1	156.67	0
HOTAIR	Q8WUM4	PDCD6IP			90		Programmed cell death 6-interacting protein	5|5|4	14	4.67	3	0|0|0	1	1	1	1	1	46.67	0
HOTAIR	O43396	TXNL1			89.9	√	Thioredoxin-like protein 1	3|4|2	9	3	3	0|0|0	1	1	1	1	1	30	0
HOTAIR	B3KWE1	HARS1			89.8		Histidine--tRNA ligase, cytoplasmic	7|8|8	23	7.67	3	0|0|0	1	1	1	1	1	76.67	0
HOTAIR	Q00765	REEP5			89.6	√	Receptor expression-enhancing protein 5	5|2|3	10	3.33	3	0|0|0	1	1	1	1	1	33.33	0
HOTAIR	A0A087WUL2	PSMB3			89.6	√	Proteasome subunit beta type-3 (Fragment)	12|11|10	33	11	3	0|0|0	1	1	1	1	1	110	0
HOTAIR	Q14232	EIF2B1			89.4		Translation initiation factor eIF-2B subunit alpha	2|3|3	8	2.67	3	0|0|0	1	1	1	1	1	26.67	0
HOTAIR	C9JBI3	PSPH			89.3	√	Phosphoserine phosphatase (Fragment)	9|6|9	24	8	3	0|0|0	1	1	1	1	1	80	0
HOTAIR	P00403	MT-CO2			89.2		Cytochrome c oxidase subunit 2	3|1|3	7	2.33	3	0|0|0	1	1	1	1	1	23.33	0
HOTAIR	P61086	UBE2K			89.2	√	Ubiquitin-conjugating enzyme E2 K	11|8|6	25	8.33	3	0|0|0	1	1	1	1	1	83.33	0
HOTAIR	Q16555	DPYSL2			89.1		Dihydropyrimidinase-related protein 2	6|6|3	15	5	3	0|0|0	1	1	1	1	1	50	0
HOTAIR	Q12907	LMAN2			89.1	√	Vesicular integral-membrane protein VIP36	3|8|4	15	5	3	0|0|0	1	1	1	1	1	50	0
HOTAIR	P51665	PSMD7			89.1	√	26S proteasome non-ATPase regulatory subunit 7	3|5|2	10	3.33	3	0|0|0	1	1	1	1	1	33.33	0
HOTAIR	P20073	ANXA7		√	88.9	√	Annexin A7	7|3|5	15	5	3	0|0|0	1	1	1	1	1	50	0
HOTAIR	A0A1B0GUY0	ALDH7A1			88.9	√	Alpha-aminoadipic semialdehyde dehydrogenase (Fragment)	4|4|3	11	3.67	3	0|0|0	1	1	1	1	1	36.67	0
HOTAIR	P21964	COMT			88.9	√	Catechol O-methyltransferase	3|4|7	14	4.67	3	0|0|0	1	1	1	1	1	46.67	0
HOTAIR	Q99598	TSNAX		√	88.8	√	Translin-associated protein X	8|8|8	24	8	3	0|0|0	1	1	1	1	1	80	0
HOTAIR	O95292	VAPB			88.8	√	Vesicle-associated membrane protein-associated protein B/C	2|2|2	6	2	3	0|0|0	1	1	1	1	1	20	0
HOTAIR	Q969X5	ERGIC1			88.6		Endoplasmic reticulum-Golgi intermediate compartment protein 1	9|5|6	20	6.67	3	0|0|0	1	1	1	1	1	66.67	0
HOTAIR	P55263	ADK	√		88.5	√	Adenosine kinase	8|6|7	21	7	3	0|0|0	1	1	1	1	1	70	0
HOTAIR	P43686	PSMC4			88.4		26S proteasome regulatory subunit 6B	6|9|5	20	6.67	3	0|0|0	1	1	1	1	1	66.67	0
HOTAIR	P52888	THOP1			88.3	√	Thimet oligopeptidase	4|4|3	11	3.67	3	0|0|0	1	1	1	1	1	36.67	0
HOTAIR	O94826	TOMM70			88.3		Mitochondrial import receptor subunit TOM70	1|5|3	9	3	3	0|0|0	1	1	1	1	1	30	0
HOTAIR	Q9UNZ2	NSFL1C			88.2		NSFL1 cofactor p47	9|8|4	21	7	3	0|0|0	1	1	1	1	1	70	0
HOTAIR	Q09028	RBBP4			88	√	Histone-binding protein RBBP4	5|2|4	11	3.67	3	0|0|0	1	1	1	1	1	36.67	0
HOTAIR	Q9H0U4	RAB1B			87.9	√	Ras-related protein Rab-1B	11|9|14	34	11.33	3	0|0|0	1	1	1	1	1	113.33	0
HOTAIR	Q13177	PAK2			87.8	√	Serine/threonine-protein kinase PAK 2	12|15|11	38	12.67	3	0|0|0	1	1	1	1	1	126.67	0
HOTAIR	Q9UBX3	SLC25A10			87.8		Mitochondrial dicarboxylate carrier	6|5|7	18	6	3	0|0|0	1	1	1	1	1	60	0
HOTAIR	P05026	ATP1B1			87.6		Sodium/potassium-transporting ATPase subunit beta-1	4|4|3	11	3.67	3	0|0|0	1	1	1	1	1	36.67	0
HOTAIR	K7EJC1	PSMD8			87.5	√	26S proteasome non-ATPase regulatory subunit 8	2|3|3	8	2.67	3	0|0|0	1	1	1	1	1	26.67	0
HOTAIR	P09972	ALDOC			87.4	√	Fructose-bisphosphate aldolase C	7|5|5	17	5.67	3	0|0|0	1	1	1	1	1	56.67	0
HOTAIR	Q6NUK1	SLC25A24			87.4		Calcium-binding mitochondrial carrier protein SCaMC-1	9|15|12	36	12	3	0|0|0	1	1	1	1	1	120	0
HOTAIR	B4DKY1	CARS1			87.2		Cysteine--tRNA ligase, cytoplasmic	2|2|3	7	2.33	3	0|0|0	1	1	1	1	1	23.33	0
HOTAIR	A0A2R8Y430	GSS			87.1	√	Glutathione synthetase	13|12|16	41	13.67	3	0|0|0	1	1	1	1	1	136.67	0
HOTAIR	P07099	EPHX1			87		Epoxide hydrolase 1	7|6|10	23	7.67	3	0|0|0	1	1	1	1	1	76.67	0
HOTAIR	Q5JYR4	RPN2		√	86.9	√	Dolichyl-diphosphooligosaccharide--protein glycosyltransferase subunit 2 (Fragment)	4|2|3	9	3	3	0|0|0	1	1	1	1	1	30	0
HOTAIR	Q02818	NUCB1			86.8	√	Nucleobindin-1	5|8|7	20	6.67	3	0|0|0	1	1	1	1	1	66.67	0
HOTAIR	O00764	PDXK			86.8	√	Pyridoxal kinase	6|6|8	20	6.67	3	0|0|0	1	1	1	1	1	66.67	0
HOTAIR	O96008	TOMM40			86.8		Mitochondrial import receptor subunit TOM40 homolog	4|2|6	12	4	3	0|0|0	1	1	1	1	1	40	0
HOTAIR	A0A087WTB8	UCHL3			86.8	√	Ubiquitin carboxyl-terminal hydrolase	2|3|5	10	3.33	3	0|0|0	1	1	1	1	1	33.33	0
HOTAIR	B1AH87	TSPO			86.8	√	Putative peripheral benzodiazepine receptor-related protein (Fragment)	3|2|4	9	3	3	0|0|0	1	1	1	1	1	30	0
HOTAIR	P36405	ARL3			86.7	√	ADP-ribosylation factor-like protein 3	2|3|2	7	2.33	3	0|0|0	1	1	1	1	1	23.33	0
HOTAIR	O43765	SGTA			86.5	√	Small glutamine-rich tetratricopeptide repeat-containing protein alpha	2|4|2	8	2.67	3	0|0|0	1	1	1	1	1	26.67	0
HOTAIR	Q16401	PSMD5			86.4	√	26S proteasome non-ATPase regulatory subunit 5	6|3|3	12	4	3	0|0|0	1	1	1	1	1	40	0
HOTAIR	P43121	MCAM			86.3		Cell surface glycoprotein MUC18	7|8|5	20	6.67	3	0|0|0	1	1	1	1	1	66.67	0
HOTAIR	O00154	ACOT7			86.3		Cytosolic acyl coenzyme A thioester hydrolase	3|3|3	9	3	3	0|0|0	1	1	1	1	1	30	0
HOTAIR	P53985	SLC16A1			86.2		Monocarboxylate transporter 1	3|2|3	8	2.67	3	0|0|0	1	1	1	1	1	26.67	0
HOTAIR	Q9BV57	ADI1			86		1,2-dihydroxy-3-keto-5-methylthiopentene dioxygenase	4|6|5	15	5	3	0|0|0	1	1	1	1	1	50	0
HOTAIR	P11172	UMPS			86	√	Uridine 5'-monophosphate synthase	12|10|11	33	11	3	0|0|0	1	1	1	1	1	110	0
HOTAIR	F8W7Q4	FAM162A			86	√	Protein FAM162A	1|3|1	5	1.67	3	0|0|0	1	1	1	1	1	16.67	0
HOTAIR	P17655	CAPN2			85.9		Calpain-2 catalytic subunit	14|16|16	46	15.33	3	0|0|0	1	1	1	1	1	153.33	0
HOTAIR	Q96P70	IPO9			85.9	√	Importin-9	6|3|5	14	4.67	3	0|0|0	1	1	1	1	1	46.67	0
HOTAIR	A0A0A6YYA0	TMED7-TICAM2			85.9		Protein TMED7-TICAM2	6|5|6	17	5.67	3	0|0|0	1	1	1	1	1	56.67	0
HOTAIR	P08754	GNAI3			85.7	√	Guanine nucleotide-binding protein G(i) subunit alpha	2|7|2	11	3.67	3	0|0|0	1	1	1	1	1	36.67	0
HOTAIR	Q9UL25	RAB21			85.5	√	Ras-related protein Rab-21	3|2|2	7	2.33	3	0|0|0	1	1	1	1	1	23.33	0
HOTAIR	I3L4H1	PITPNA			85.4	√	Phosphatidylinositol transfer protein alpha isoform (Fragment)	4|5|6	15	5	3	0|0|0	1	1	1	1	1	50	0
HOTAIR	P62873	GNB1			85.3		Guanine nucleotide-binding protein G(I)/G(S)/G(T) subunit beta-1	9|7|8	24	8	3	0|0|0	1	1	1	1	1	80	0
HOTAIR	Q14696	MESD			85.2	√	LRP chaperone MESD	7|7|4	18	6	3	0|0|0	1	1	1	1	1	60	0
HOTAIR	Q9NRV9	HEBP1			85.2	√	Heme-binding protein 1	6|10|9	25	8.33	3	0|0|0	1	1	1	1	1	83.33	0
HOTAIR	P63151	PPP2R2A			85.1		Serine/threonine-protein phosphatase 2A 55 kDa regulatory subunit B alpha isoform	6|7|8	21	7	3	0|0|0	1	1	1	1	1	70	0
HOTAIR	Q13228	SELENBP1			85.1		Methanethiol oxidase	5|6|12	23	7.67	3	0|0|0	1	1	1	1	1	76.67	0
HOTAIR	P11233	RALA			84.9	√	Ras-related protein Ral-A	8|11|8	27	9	3	0|0|0	1	1	1	1	1	90	0
HOTAIR	Q9Y570	PPME1		√	84.5	√	Protein phosphatase methylesterase 1	2|5|3	10	3.33	3	0|0|0	1	1	1	1	1	33.33	0
HOTAIR	P04040	CAT			84.5		Catalase	10|4|4	18	6	3	0|0|0	1	1	1	1	1	60	0
HOTAIR	O95573	ACSL3			84.4	√	Long-chain-fatty-acid--CoA ligase 3	4|3|5	12	4	3	0|0|0	1	1	1	1	1	40	0
HOTAIR	P10155	RO60			84.4	√	60 kDa SS-A/Ro ribonucleoprotein	9|5|5	19	6.33	3	0|0|0	1	1	1	1	1	63.33	0
HOTAIR	P43304	GPD2			84.2		Glycerol-3-phosphate dehydrogenase, mitochondrial	2|4|4	10	3.33	3	0|0|0	1	1	1	1	1	33.33	0
HOTAIR	A0A0C4DGS1	DDOST			84.2	√	Dolichyl-diphosphooligosaccharide--protein glycosyltransferase 48 kDa subunit	4|4|5	13	4.33	3	0|0|0	1	1	1	1	1	43.33	0
HOTAIR	Q9BVK6	TMED9			83.6	√	Transmembrane emp24 domain-containing protein 9	6|3|5	14	4.67	3	0|0|0	1	1	1	1	1	46.67	0
HOTAIR	P36507	MAP2K2			83.1		Dual specificity mitogen-activated protein kinase kinase 2	5|5|4	14	4.67	3	0|0|0	1	1	1	1	1	46.67	0
HOTAIR	A0A286YF37	FBXO2			82.8	√	F-box only protein 2 (Fragment)	4|4|3	11	3.67	3	0|0|0	1	1	1	1	1	36.67	0
HOTAIR	E9PKL9	GFUS			82.4		GDP-L-fucose synthase (Fragment)	2|2|2	6	2	3	0|0|0	1	1	1	1	1	20	0
HOTAIR	P21399	ACO1			82.3		Cytoplasmic aconitate hydratase	11|13|12	36	12	3	0|0|0	1	1	1	1	1	120	0
HOTAIR	O00273	DFFA			82.2	√	DNA fragmentation factor subunit alpha	3|3|2	8	2.67	3	0|0|0	1	1	1	1	1	26.67	0
HOTAIR	Q6XQN6	NAPRT			82.2		Nicotinate phosphoribosyltransferase	14|15|15	44	14.67	3	0|0|0	1	1	1	1	1	146.67	0
HOTAIR	F8W914	RTN4	√		81.7	√	Reticulon	4|5|6	15	5	3	0|0|0	1	1	1	1	1	50	0
HOTAIR	P13929	ENO3			81.4		Beta-enolase	4|3|4	11	3.67	3	0|0|0	1	1	1	1	1	36.67	0
HOTAIR	A0A494C0L6	TYMP			81.3	√	Thymidine phosphorylase (Fragment)	2|4|5	11	3.67	3	0|0|0	1	1	1	1	1	36.67	0
HOTAIR	G3V192	FTH1			81.2	√	Ferritin	8|6|10	24	8	3	0|0|0	1	1	1	1	1	80	0
HOTAIR	P30533	LRPAP1			81		Alpha-2-macroglobulin receptor-associated protein	6|9|8	23	7.67	3	0|0|0	1	1	1	1	1	76.67	0
HOTAIR	Q5T6V5	C9orf64			80.7		Queuosine salvage protein	5|4|6	15	5	3	0|0|0	1	1	1	1	1	50	0
HOTAIR	O43598	DNPH1			80.6	√	2'-deoxynucleoside 5'-phosphate N-hydrolase 1	5|5|3	13	4.33	3	0|0|0	1	1	1	1	1	43.33	0
HOTAIR	Q8NFQ8	TOR1AIP2			80.6		Torsin-1A-interacting protein 2	8|5|4	17	5.67	3	0|0|0	1	1	1	1	1	56.67	0
HOTAIR	Q96G03	PGM2			80.2	√	Phosphoglucomutase-2	9|6|7	22	7.33	3	0|0|0	1	1	1	1	1	73.33	0
HOTAIR	O00592	PODXL			80.1	√	Podocalyxin	3|5|4	12	4	3	0|0|0	1	1	1	1	1	40	0
HOTAIR	Q9BTV4	TMEM43			80.1		Transmembrane protein 43	8|10|8	26	8.67	3	0|0|0	1	1	1	1	1	86.67	0
HOTAIR	E7ETU9	PLOD2			80	√	Procollagen-lysine,2-oxoglutarate 5-dioxygenase 2	9|3|6	18	6	3	0|0|0	1	1	1	1	1	60	0
HOTAIR	H3BP35	MVD			80	√	Diphosphomevalonate decarboxylase (Fragment)	2|2|3	7	2.33	3	0|0|0	1	1	1	1	1	23.33	0
HOTAIR	P48163	ME1			79.8		NADP-dependent malic enzyme	2|2|4	8	2.67	3	0|0|0	1	1	1	1	1	26.67	0
HOTAIR	Q13564	NAE1			79.8		NEDD8-activating enzyme E1 regulatory subunit	10|6|5	21	7	3	0|0|0	1	1	1	1	1	70	0
HOTAIR	O60568	PLOD3			78.8	√	Multifunctional procollagen lysine hydroxylase and glycosyltransferase LH3	7|9|9	25	8.33	3	0|0|0	1	1	1	1	1	83.33	0
HOTAIR	P07686	HEXB			78.5	√	Beta-hexosaminidase subunit beta	12|12|10	34	11.33	3	0|0|0	1	1	1	1	1	113.33	0
HOTAIR	P67775	PPP2CA			78.3		Serine/threonine-protein phosphatase 2A catalytic subunit alpha isoform	4|2|5	11	3.67	3	0|0|0	1	1	1	1	1	36.67	0
HOTAIR	Q9HDC9	APMAP			78.2	√	Adipocyte plasma membrane-associated protein	14|12|15	41	13.67	3	0|0|0	1	1	1	1	1	136.67	0
HOTAIR	Q9H7Z7	PTGES2			78.1		Prostaglandin E synthase 2	8|8|9	25	8.33	3	0|0|0	1	1	1	1	1	83.33	0
HOTAIR	P01111	NRAS			77.8		GTPase NRas	2|5|4	11	3.67	3	0|0|0	1	1	1	1	1	36.67	0
HOTAIR	Q06203	PPAT			77.5		Amidophosphoribosyltransferase	5|6|4	15	5	3	0|0|0	1	1	1	1	1	50	0
HOTAIR	Q9H936	SLC25A22			77.4		Mitochondrial glutamate carrier 1	4|3|4	11	3.67	3	0|0|0	1	1	1	1	1	36.67	0
HOTAIR	Q02809	PLOD1			77	√	Procollagen-lysine,2-oxoglutarate 5-dioxygenase 1	4|7|4	15	5	3	0|0|0	1	1	1	1	1	50	0
HOTAIR	H3BS10	HEXA			76.8	√	Beta-hexosaminidase	4|6|12	22	7.33	3	0|0|0	1	1	1	1	1	73.33	0
HOTAIR	A0A1B0GTY1	FTO			76.7	√	Alpha-ketoglutarate-dependent dioxygenase FTO	3|4|5	12	4	3	0|0|0	1	1	1	1	1	40	0
HOTAIR	P31150	GDI1			76.4		Rab GDP dissociation inhibitor alpha	3|3|5	11	3.67	3	0|0|0	1	1	1	1	1	36.67	0
HOTAIR	A0AVT1	UBA6			76.1	√	Ubiquitin-like modifier-activating enzyme 6	3|6|5	14	4.67	3	0|0|0	1	1	1	1	1	46.67	0
HOTAIR	Q92597	NDRG1			75.8		Protein NDRG1	8|7|5	20	6.67	3	0|0|0	1	1	1	1	1	66.67	0
HOTAIR	P36639	NUDT1			75.7		7,8-dihydro-8-oxoguanine triphosphatase	2|3|4	9	3	3	0|0|0	1	1	1	1	1	30	0
HOTAIR	Q9BYT8	NLN			75.3		Neurolysin, mitochondrial	4|13|9	26	8.67	3	0|0|0	1	1	1	1	1	86.67	0
HOTAIR	C9JP16	CRTAP			75.3	√	Cartilage-associated protein	7|5|6	18	6	3	0|0|0	1	1	1	1	1	60	0
HOTAIR	Q9GZT8	NIF3L1			74.4		NIF3-like protein 1	13|11|7	31	10.33	3	0|0|0	1	1	1	1	1	103.33	0
HOTAIR	Q9BRK5	SDF4			74.4		45 kDa calcium-binding protein	4|9|6	19	6.33	3	0|0|0	1	1	1	1	1	63.33	0
HOTAIR	O60443	GSDME			74.1		Gasdermin-E	3|4|2	9	3	3	0|0|0	1	1	1	1	1	30	0
HOTAIR	E7EWE1	UBA5			73.8	√	Ubiquitin-like modifier-activating enzyme 5	3|8|6	17	5.67	3	0|0|0	1	1	1	1	1	56.67	0
HOTAIR	Q96C86	DCPS			73.6	√	m7GpppX diphosphatase	8|12|8	28	9.33	3	0|0|0	1	1	1	1	1	93.33	0
HOTAIR	A0A3B3IRL5	IMPDH1			73	√	Inosine-5'-monophosphate dehydrogenase (Fragment)	1|0|1	2	0.67	3	0|0|0	0	0	0	0	0	6.67	0
HOTAIR	Q9P0L0	VAPA		√	72.9	√	Vesicle-associated membrane protein-associated protein A	8|10|6	24	8	3	0|0|0	1	1	1	1	1	80	0
HOTAIR	Q8NEZ5	FBXO22			72.9		F-box only protein 22	1|1|4	6	2	3	0|0|0	1	1	1	1	1	20	0
HOTAIR	P11166	SLC2A1			72.2		Solute carrier family 2, facilitated glucose transporter member 1	4|3|4	11	3.67	3	0|0|0	1	1	1	1	1	36.67	0
HOTAIR	F5H345	HMBS			71.9	√	Porphobilinogen deaminase	1|6|3	10	3.33	3	0|0|0	1	1	1	1	1	33.33	0
HOTAIR	Q9BT09	CNPY3			71.6	√	Protein canopy homolog 3	2|6|3	11	3.67	3	0|0|0	1	1	1	1	1	36.67	0
HOTAIR	A0A0G2JNZ5	GBA			71.5	√	Glucosylceramidase	6|6|5	17	5.67	3	0|0|0	1	1	1	1	1	56.67	0
HOTAIR	Q9H488	POFUT1			70.8		GDP-fucose protein O-fucosyltransferase 1	13|17|17	47	15.67	3	0|0|0	1	1	1	1	1	156.67	0
HOTAIR	J3QQV6	PNPO			70.7	√	Pyridoxine-5'-phosphate oxidase (Fragment)	3|1|2	6	2	3	0|0|0	1	1	1	1	1	20	0
HOTAIR	A0A0G2JKZ1	TAPBP			70.2	√	Tapasin	4|3|3	10	3.33	3	0|0|0	1	1	1	1	1	33.33	0
HOTAIR	Q96JJ7	TMX3			69.7	√	Protein disulfide-isomerase TMX3	1|2|2	5	1.67	3	0|0|0	1	1	1	1	1	16.67	0
HOTAIR	Q32P28	P3H1			69.6	√	Prolyl 3-hydroxylase 1	6|4|5	15	5	3	0|0|0	1	1	1	1	1	50	0
HOTAIR	P32320	CDA			69.1		Cytidine deaminase	4|4|5	13	4.33	3	0|0|0	1	1	1	1	1	43.33	0
HOTAIR	Q9NX46	ADPRS			67.5		ADP-ribose glycohydrolase ARH3	2|2|1	5	1.67	3	0|0|0	1	1	1	1	1	16.67	0
HOTAIR	P85037	FOXK1			66.7	√	Forkhead box protein K1	4|3|5	12	4	3	0|0|0	1	1	1	1	1	40	0
HOTAIR	P48449	LSS			64.7		Lanosterol synthase	6|7|7	20	6.67	3	0|0|0	1	1	1	1	1	66.67	0
HOTAIR	Q8IWE2	FAM114A1			64.1		Protein NOXP20	3|3|3	9	3	3	0|0|0	1	1	1	1	1	30	0
HOTAIR	P10909	CLU			61.8		Clusterin	1|4|4	9	3	3	0|0|0	1	1	1	1	1	30	0
HOTAIR	A0A1B0GU86	ACY1			60.2	√	Aminoacylase-1	10|12|11	33	11	3	0|0|0	1	1	1	1	1	110	0
HOTAIR	V9GYS5	HDDC2			59.7		HD domain-containing protein 2	3|2|2	7	2.33	3	0|0|0	1	1	1	1	1	23.33	0
HOTAIR	Q9NVG8	TBC1D13			58.8		TBC1 domain family member 13	4|4|2	10	3.33	3	0|0|0	1	1	1	1	1	33.33	0
HOTAIR	Q00534	CDK6			58.6	√	Cyclin-dependent kinase 6	3|2|1	6	2	3	0|0|0	1	1	1	1	1	20	0
HOTAIR	Q12906	ILF3	√	√	57.6	√	Interleukin enhancer-binding factor 3	5|8|7	20	6.67	3	0|0|0	1	1	1	1	1	66.67	0
HOTAIR	Q9BRR6	ADPGK			57.2	√	ADP-dependent glucokinase	7|5|7	19	6.33	3	0|0|0	1	1	1	1	1	63.33	0
HOTAIR	Q96C23	GALM			54.8	√	Aldose 1-epimerase	3|3|2	8	2.67	3	0|0|0	1	1	1	1	1	26.67	0
HOTAIR	Q6RW13	AGTRAP			53.9		Type-1 angiotensin II receptor-associated protein	2|2|2	6	2	3	0|0|0	1	1	1	1	1	20	0
HOTAIR	O15460	P4HA2			53.1	√	Prolyl 4-hydroxylase subunit alpha-2	8|7|6	21	7	3	0|0|0	1	1	1	1	1	70	0
HOTAIR	H3BRY5	SULT1A1			46.4	√	Sulfotransferase (Fragment)	5|7|6	18	6	3	0|0|0	1	1	1	1	1	60	0
HOTAIR	P09104	ENO2			45.6		Gamma-enolase	6|9|4	19	6.33	3	0|0|0	1	1	1	1	1	63.33	0
HOTAIR	Q15274	QPRT			41.2		Nicotinate-nucleotide pyrophosphorylase [carboxylating]	5|8|5	18	6	3	0|0|0	1	1	1	1	1	60	0
HOTAIR	P08648	ITGA5			29.1		Integrin alpha-5	6|4|5	15	5	3	0|0|0	1	1	1	1	1	50	0
HOTAIR	P09923	ALPI			25.6		Intestinal-type alkaline phosphatase	1|4|4	9	3	3	0|0|0	1	1	1	1	1	30	0
HOTAIR	Q07954	LRP1	√		22		Prolow-density lipoprotein receptor-related protein 1	2|2|2	6	2	3	0|0|0	1	1	1	1	1	20	0
HOTAIR	H3BMH2	RAB11A			21.1	√	Ras-related protein Rab-11A (Fragment)	10|10|7	27	9	3	0|0|0	1	1	1	1	1	90	0
HOTAIR	Q9H3R2	MUC13			8		Mucin-13	5|5|6	16	5.33	3	0|0|0	1	1	1	1	1	53.33	0
HOTAIR	Q96CX2	KCTD12			5.8		BTB/POZ domain-containing protein KCTD12	3|5|3	11	3.67	3	0|0|0	1	1	1	1	1	36.67	0
HOTAIR	A0A2R8Y6B6	GPX1			3.9	√	Glutathione peroxidase 1	4|4|5	13	4.33	3	0|0|0	1	1	1	1	1	43.33	0
HOTAIR	Q93077	H2AC6					Histone H2A type 1-C	3|4|9	16	5.33	3	0|0|0	1	1	1	1	1	53.33	0
HOTAIR	G3V1R5	NRDC				√	Nardilysin	4|3|6	13	4.33	3	0|0|0	1	1	1	1	1	43.33	0
HOTAIR	J3QLE5	SNRPN				√	Small nuclear ribonucleoprotein-associated protein N (Fragment)	3|3|7	13	4.33	3	0|0|0	1	1	1	1	1	43.33	0
HOTAIR	F8WCJ1	EIF5A2				√	Eukaryotic translation initiation factor 5A	3|4|4	11	3.67	3	0|0|0	1	1	1	1	1	36.67	0
AP: Copy number Abundance Percentile
Superscript 1: Castello et al. 2012
Superscript 2: Trendel et al. 2019

## Sheet: HOTAIR-1
Majority protein IDs	Protein Name	Description	Number of proteins	Peptides	Razor + unique peptides	Unique peptides	Sequence coverage [%]	Unique + razor sequence coverage [%]	Unique sequence coverage [%]	Mol. weight [kDa]	Sequence length	Q-value	Score	Intensity	MS/MS count
P49588	AARS1	Alanine--tRNA ligase, cytoplasmic OS=Homo sapiens OX=9606 GN=AARS PE=1 SV=2	2	20	20	20	24.1	24.1	24.1	106.81	968	0	106.69	62049000	25
Q9BWD1	ACAT2	Acetyl-CoA acetyltransferase, cytosolic OS=Homo sapiens OX=9606 GN=ACAT2 PE=1 SV=2	1	2	2	2	4.8	4.8	4.8	41.35	397	0	2.6267	1270000	1
P53396	ACLY	ATP-citrate synthase OS=Homo sapiens OX=9606 GN=ACLY PE=1 SV=3	1	7	7	7	7.9	7.9	7.9	120.84	1101	0	12.079	8769100	9
P21399	ACO1	Cytoplasmic aconitate hydratase OS=Homo sapiens OX=9606 GN=ACO1 PE=1 SV=3	1	10	10	10	14.8	14.8	14.8	98.398	889	0	19.451	10791000	11
O00154	ACOT7	Cytosolic acyl coenzyme A thioester hydrolase OS=Homo sapiens OX=9606 GN=ACOT7 PE=1 SV=3	2	3	3	3	13.9	13.9	13.9	41.796	380	0	6.302	2105800	3
O95573	ACSL3	Long-chain-fatty-acid--CoA ligase 3 OS=Homo sapiens OX=9606 GN=ACSL3 PE=1 SV=3	2	5	5	5	9.6	9.6	9.6	80.419	720	0	5.966	3428100	4
P68133	ACTA1	Actin, alpha skeletal muscle OS=Homo sapiens OX=9606 GN=ACTA1 PE=1 SV=1	8	25	2	2	37.1	7.2	7.2	42.051	377	0	17.418	75871000	8
P12814	ACTN1	Alpha-actinin-1 OS=Homo sapiens OX=9606 GN=ACTN1 PE=1 SV=2	8	26	11	11	31.1	14.6	14.6	103.06	892	0	25.171	29972000	11
O43707	ACTN4	Alpha-actinin-4 OS=Homo sapiens OX=9606 GN=ACTN4 PE=1 SV=2	19	49	49	34	62.2	62.2	46.1	104.85	911	0	167.81	245100000	77
P61158	ACTR3	Actin-related protein 3 OS=Homo sapiens OX=9606 GN=ACTR3 PE=1 SV=3	9	4	4	4	10.8	10.8	10.8	47.371	418	0	5.0469	1856000	2
A0A1B0GU86	ACY1	Aminoacylase-1 OS=Homo sapiens OX=9606 GN=ACY1 PE=1 SV=1	13	8	8	8	20.1	20.1	20.1	42.179	373	0	15.667	28038000	10
F5GWI4	ADA	Adenosine deaminase OS=Homo sapiens OX=9606 GN=ADA PE=1 SV=1	4	3	3	3	16.8	16.8	16.8	38.292	339	0	9.3032	5853100	2
P11766	ADH5	Alcohol dehydrogenase class-3 OS=Homo sapiens OX=9606 GN=ADH5 PE=1 SV=4	5	4	4	4	13.6	13.6	13.6	39.724	374	0	6.4287	4376700	3
Q9BV57	ADI1	1,2-dihydroxy-3-keto-5-methylthiopentene dioxygenase OS=Homo sapiens OX=9606 GN=ADI1 PE=1 SV=1	1	3	3	3	12.3	12.3	12.3	21.498	179	0	5.4227	3435900	4
P55263	ADK	Adenosine kinase OS=Homo sapiens OX=9606 GN=ADK PE=1 SV=2	1	6	6	6	20.7	20.7	20.7	40.545	362	0	17.024	9383500	8
Q9BRR6	ADPGK	ADP-dependent glucokinase OS=Homo sapiens OX=9606 GN=ADPGK PE=1 SV=1	4	6	6	6	18.9	18.9	18.9	54.088	497	0	16.039	15037000	7
Q9NX46	ADPRS	ADP-ribose glycohydrolase ARH3 OS=Homo sapiens OX=9606 GN=ADPRHL2 PE=1 SV=1	1	2	2	2	6.9	6.9	6.9	38.946	363	0	3.912	2503500	2
P30520	ADSS2	Adenylosuccinate synthetase isozyme 2 OS=Homo sapiens OX=9606 GN=ADSS PE=1 SV=3	1	2	2	2	6.4	6.4	6.4	50.097	456	0	3.5085	1131400	2
E9PC15	AGK	Acylglycerol kinase, mitochondrial OS=Homo sapiens OX=9606 GN=AGK PE=1 SV=1	11	3	3	3	12.9	12.9	12.9	43.796	394	0	3.6575	3604300	3
Q6RW13	AGTRAP	Type-1 angiotensin II receptor-associated protein OS=Homo sapiens OX=9606 GN=AGTRAP PE=1 SV=1	1	2	2	2	24.5	24.5	24.5	17.419	159	0	7.8604	2057100	2
P23526	AHCY	Adenosylhomocysteinase OS=Homo sapiens OX=9606 GN=AHCY PE=1 SV=4	1	7	7	7	18.5	18.5	18.5	47.716	432	0	15.609	11929000	6
O95433	AHSA1	Activator of 90 kDa heat shock protein ATPase homolog 1 OS=Homo sapiens OX=9606 GN=AHSA1 PE=1 SV=1	6	6	6	6	19.5	19.5	19.5	38.274	338	0	17.001	15583000	8
P00568	AK1	Adenylate kinase isoenzyme 1 OS=Homo sapiens OX=9606 GN=AK1 PE=1 SV=3	3	4	4	4	26.3	26.3	26.3	21.635	194	0	4.2199	3772400	3
F8W1A4	AK2	Adenylate kinase 2, mitochondrial OS=Homo sapiens OX=9606 GN=AK2 PE=1 SV=1	6	6	6	6	32.3	32.3	32.3	25.63	232	0	12.38	12658000	7
P14550	AKR1A1	Aldo-keto reductase family 1 member A1 OS=Homo sapiens OX=9606 GN=AKR1A1 PE=1 SV=3	4	5	5	5	22.5	22.5	22.5	36.573	325	0	9.2517	3217800	3
P15121	AKR1B1	Aldo-keto reductase family 1 member B1 OS=Homo sapiens OX=9606 GN=AKR1B1 PE=1 SV=3	3	3	3	3	14.2	14.2	14.2	35.853	316	0	3.3199	5453000	3
Q13740	ALCAM	CD166 antigen OS=Homo sapiens OX=9606 GN=ALCAM PE=1 SV=2	3	4	4	4	8.7	8.7	8.7	65.102	583	0	4.6762	25019000	4
A0A1B0GUY0	ALDH7A1	Alpha-aminoadipic semialdehyde dehydrogenase (Fragment) OS=Homo sapiens OX=9606 GN=ALDH7A1 PE=1 SV=1	13	3	3	3	11.2	11.2	11.2	37.713	348	0	5.8175	5548300	4
P49189	ALDH9A1	4-trimethylaminobutyraldehyde dehydrogenase OS=Homo sapiens OX=9606 GN=ALDH9A1 PE=1 SV=3	1	7	7	7	18.2	18.2	18.2	53.801	494	0	26.122	18655000	10
P04075	ALDOA	Fructose-bisphosphate aldolase A OS=Homo sapiens OX=9606 GN=ALDOA PE=1 SV=2	12	25	25	23	70.3	70.3	60.7	39.42	364	0	136.07	257980000	39
P09972	ALDOC	Fructose-bisphosphate aldolase C OS=Homo sapiens OX=9606 GN=ALDOC PE=1 SV=2	7	6	4	4	27.5	17.9	17.9	39.455	364	0	21.302	15189000	7
P09923	ALPI	Intestinal-type alkaline phosphatase OS=Homo sapiens OX=9606 GN=ALPI PE=1 SV=2	1	6	2	2	15.5	7.2	7.2	56.811	528	0	4.2427	7179200	1
P05186	ALPL	Alkaline phosphatase, tissue-nonspecific isozyme OS=Homo sapiens OX=9606 GN=ALPL PE=1 SV=4	3	11	11	11	33	33	33	57.304	524	0	31.37	68256000	19
P05187	ALPP	Alkaline phosphatase, placental type OS=Homo sapiens OX=9606 GN=ALPP PE=1 SV=2	2	22	22	18	46.4	46.4	39.8	57.953	535	0	60.407	209570000	30
H0Y360	AMPD2	AMP deaminase 2 (Fragment) OS=Homo sapiens OX=9606 GN=AMPD2 PE=1 SV=1	3	3	3	3	3.8	3.8	3.8	98.401	861	0	4.8305	2728100	3
H0YN26	ANP32A	Acidic leucine-rich nuclear phosphoprotein 32 family member A OS=Homo sapiens OX=9606 GN=ANP32A PE=1 SV=1	5	9	9	8	48.6	48.6	44.6	19.997	177	0	38.772	63480000	11
Q92688	ANP32B	Acidic leucine-rich nuclear phosphoprotein 32 family member B OS=Homo sapiens OX=9606 GN=ANP32B PE=1 SV=1	1	7	6	6	28.7	25.9	25.9	28.787	251	0	11.606	40136000	15
P04083	ANXA1	Annexin A1 OS=Homo sapiens OX=9606 GN=ANXA1 PE=1 SV=2	3	17	17	17	58.7	58.7	58.7	38.714	346	0	132.39	136910000	29
P07355	ANXA2	Annexin A2 OS=Homo sapiens OX=9606 GN=ANXA2 PE=1 SV=2	24	29	29	29	76.4	76.4	76.4	38.604	339	0	133.63	375970000	54
P12429	ANXA3	Annexin A3 OS=Homo sapiens OX=9606 GN=ANXA3 PE=1 SV=3	6	12	12	12	41.5	41.5	41.5	36.375	323	0	35.188	67224000	11
P08758	ANXA5	Annexin A5 OS=Homo sapiens OX=9606 GN=ANXA5 PE=1 SV=2	5	20	20	20	53.4	53.4	53.4	35.936	320	0	88.931	519390000	40
P08133	ANXA6	Annexin A6 OS=Homo sapiens OX=9606 GN=ANXA6 PE=1 SV=3	10	19	19	19	34.8	34.8	34.8	75.872	673	0	35.44	38781000	22
P20073	ANXA7	Annexin A7 OS=Homo sapiens OX=9606 GN=ANXA7 PE=1 SV=3	1	5	5	5	13.9	13.9	13.9	52.739	488	0	29.244	21505000	7
P13798	APEH	Acylamino-acid-releasing enzyme OS=Homo sapiens OX=9606 GN=APEH PE=1 SV=4	6	5	5	5	8.6	8.6	8.6	81.224	732	0	15.232	20243000	5
Q9HDC9	APMAP	Adipocyte plasma membrane-associated protein OS=Homo sapiens OX=9606 GN=APMAP PE=1 SV=2	2	14	14	14	39.9	39.9	39.9	46.48	416	0	28.33	52345000	14
P07741	APRT	Adenine phosphoribosyltransferase OS=Homo sapiens OX=9606 GN=APRT PE=1 SV=2	5	9	9	9	61.7	61.7	61.7	19.608	180	0	37.224	91559000	13
P84077	ARF1	ADP-ribosylation factor 1 OS=Homo sapiens OX=9606 GN=ARF1 PE=1 SV=2	10	6	6	3	46.4	46.4	17.7	20.697	181	0	10.563	40980000	5
P18085	ARF4	ADP-ribosylation factor 4 OS=Homo sapiens OX=9606 GN=ARF4 PE=1 SV=3	4	5	2	2	38.3	9.4	9.4	20.511	180	0	3.2448	3689200	4
H0YE29	ARHGAP1	Rho GTPase-activating protein 1 (Fragment) OS=Homo sapiens OX=9606 GN=ARHGAP1 PE=1 SV=1	2	3	3	3	11.7	11.7	11.7	38.276	334	0	8.4135	3987700	4
J3KTF8	ARHGDIA	Rho GDP-dissociation inhibitor 1 (Fragment) OS=Homo sapiens OX=9606 GN=ARHGDIA PE=1 SV=8	6	7	7	7	49.7	49.7	49.7	21.517	193	0	29.226	39597000	9
P36405	ARL3	ADP-ribosylation factor-like protein 3 OS=Homo sapiens OX=9606 GN=ARL3 PE=1 SV=2	1	3	3	3	10.4	10.4	10.4	20.455	182	0	3.1018	832600	2
O75915	ARL6IP5	PRA1 family protein 3 OS=Homo sapiens OX=9606 GN=ARL6IP5 PE=1 SV=1	1	2	2	2	14.4	14.4	14.4	21.614	188	0	5.2958	2928000	1
O15144	ARPC2	Actin-related protein 2/3 complex subunit 2 OS=Homo sapiens OX=9606 GN=ARPC2 PE=1 SV=1	4	2	2	2	7.7	7.7	7.7	34.333	300	0.0010989	1.8367	566530	0
R4GN08	ARPC4	Actin-related protein 2/3 complex subunit 4 (Fragment) OS=Homo sapiens OX=9606 GN=ARPC4 PE=1 SV=1	6	2	2	2	20.8	20.8	20.8	9.405	77	0	2.0648	1322900	2
P00966	ASS1	Argininosuccinate synthase OS=Homo sapiens OX=9606 GN=ASS1 PE=1 SV=2	3	14	14	14	25	25	25	46.53	412	0	24.847	62183000	22
P31939	ATIC	Bifunctional purine biosynthesis protein PURH OS=Homo sapiens OX=9606 GN=ATIC PE=1 SV=3	4	16	16	16	35.8	35.8	35.8	64.615	592	0	30.76	30544000	16
F5H6I7	ATL3	Atlastin-3 OS=Homo sapiens OX=9606 GN=ATL3 PE=1 SV=1	2	2	2	2	5.9	5.9	5.9	58.772	523	0	3.1923	4099000	2
P05023	ATP1A1	Sodium/potassium-transporting ATPase subunit alpha-1 OS=Homo sapiens OX=9606 GN=ATP1A1 PE=1 SV=1	15	21	21	21	27.9	27.9	27.9	112.89	1023	0	51.128	53715000	29
P05026	ATP1B1	Sodium/potassium-transporting ATPase subunit beta-1 OS=Homo sapiens OX=9606 GN=ATP1B1 PE=1 SV=1	2	4	4	4	18.2	18.2	18.2	35.061	303	0	5.7072	4656800	4
P54709	ATP1B3	Sodium/potassium-transporting ATPase subunit beta-3 OS=Homo sapiens OX=9606 GN=ATP1B3 PE=1 SV=1	7	4	4	4	18.3	18.3	18.3	31.512	279	0	10.994	28176000	9
P25705	ATP5F1A	ATP synthase subunit alpha, mitochondrial OS=Homo sapiens OX=9606 GN=ATP5F1A PE=1 SV=1	24	12	12	12	26.8	26.8	26.8	59.75	553	0	18.971	19946000	14
P06576	ATP5F1B	ATP synthase subunit beta, mitochondrial OS=Homo sapiens OX=9606 GN=ATP5F1B PE=1 SV=3	5	11	11	11	28.9	28.9	28.9	56.559	529	0	32.42	37952000	16
P38606	ATP6V1A	V-type proton ATPase catalytic subunit A OS=Homo sapiens OX=9606 GN=ATP6V1A PE=1 SV=2	3	5	5	5	10.4	10.4	10.4	68.303	617	0	11.237	13700000	7
P80723	BASP1	Brain acid soluble protein 1 OS=Homo sapiens OX=9606 GN=BASP1 PE=1 SV=2	1	5	5	5	51.1	51.1	51.1	22.693	227	0	32.202	21058000	7
E9PDD6	BCL2L13	Bcl-2-like protein 13 OS=Homo sapiens OX=9606 GN=BCL2L13 PE=1 SV=1	9	3	3	3	29.8	29.8	29.8	19.019	171	0	4.9916	3374500	4
O00499	BIN1	Myc box-dependent-interacting protein 1 OS=Homo sapiens OX=9606 GN=BIN1 PE=1 SV=1	6	2	2	2	4.7	4.7	4.7	64.699	593	0	3.0191	1947600	3
Q13867	BLMH	Bleomycin hydrolase OS=Homo sapiens OX=9606 GN=BLMH PE=1 SV=1	6	8	8	8	20.2	20.2	20.2	52.562	455	0	21.2	31758000	8
P30043	BLVRB	Flavin reductase (NADPH) OS=Homo sapiens OX=9606 GN=BLVRB PE=1 SV=3	5	6	6	6	45.1	45.1	45.1	22.119	206	0	11.06	27221000	9
P35613	BSG	Basigin OS=Homo sapiens OX=9606 GN=BSG PE=1 SV=2	7	7	7	7	22.1	22.1	22.1	42.2	385	0	31.906	50089000	13
P20290	BTF3	Transcription factor BTF3 OS=Homo sapiens OX=9606 GN=BTF3 PE=1 SV=1	3	3	3	3	10.7	10.7	10.7	22.168	206	0	3.5386	5325500	4
E9PFD4	BZW2	BZW2 protein OS=Homo sapiens OX=9606 GN=BZW2 PE=1 SV=2	6	2	2	2	9.5	9.5	9.5	21.511	189	0	2.7177	2369300	2
Q5T6V5	C9orf64	Queuosine salvage protein OS=Homo sapiens OX=9606 GN=C9orf64 PE=1 SV=1	3	5	5	5	12.3	12.3	12.3	39.028	341	0	10.48	9041800	5
Q9HB71	CACYBP	Calcyclin-binding protein OS=Homo sapiens OX=9606 GN=CACYBP PE=1 SV=2	2	7	7	7	32.5	32.5	32.5	26.21	228	0	41.767	25141000	10
P27797	CALR	Calreticulin OS=Homo sapiens OX=9606 GN=CALR PE=1 SV=1	3	20	20	20	63.5	63.5	63.5	48.141	417	0	116.68	432680000	41
O43852	CALU	Calumenin OS=Homo sapiens OX=9606 GN=CALU PE=1 SV=2	2	10	10	10	39.4	39.4	39.4	37.106	315	0	58.209	42258000	9
Q86VP6	CAND1	Cullin-associated NEDD8-dissociated protein 1 OS=Homo sapiens OX=9606 GN=CAND1 PE=1 SV=2	2	4	4	4	4.6	4.6	4.6	136.37	1230	0	11.846	7274100	4
P27824	CANX	Calnexin OS=Homo sapiens OX=9606 GN=CANX PE=1 SV=2	12	18	18	18	30.4	30.4	30.4	67.567	592	0	60.358	207580000	37
Q01518	CAP1	Adenylyl cyclase-associated protein 1 OS=Homo sapiens OX=9606 GN=CAP1 PE=1 SV=5	10	16	16	10	42.1	42.1	26.1	51.901	475	0	59.579	88199000	21
P40121	CAPG	Macrophage-capping protein OS=Homo sapiens OX=9606 GN=CAPG PE=1 SV=2	4	6	6	6	20.4	20.4	20.4	38.498	348	0	22.469	14963000	5
P07384	CAPN1	Calpain-1 catalytic subunit OS=Homo sapiens OX=9606 GN=CAPN1 PE=1 SV=1	11	14	14	14	19.9	19.9	19.9	81.889	714	0	21.185	23181000	13
P17655	CAPN2	Calpain-2 catalytic subunit OS=Homo sapiens OX=9606 GN=CAPN2 PE=1 SV=6	1	14	14	14	23.4	23.4	23.4	79.994	700	0	28.378	34381000	14
P04632	CAPNS1	Calpain small subunit 1 OS=Homo sapiens OX=9606 GN=CAPNS1 PE=1 SV=1	12	12	12	12	51.9	51.9	51.9	28.315	268	0	54.634	39028000	15
P52907	CAPZA1	F-actin-capping protein subunit alpha-1 OS=Homo sapiens OX=9606 GN=CAPZA1 PE=1 SV=3	1	10	10	9	44.8	44.8	41.3	32.922	286	0	27.177	55856000	10
C9JUG7	CAPZA2	F-actin-capping protein subunit alpha OS=Homo sapiens OX=9606 GN=CAPZA2 PE=1 SV=1	4	4	3	3	34.2	27.4	27.4	16.698	146	0	10.633	5326100	2
B1AK87	CAPZB	F-actin-capping protein subunit beta OS=Homo sapiens OX=9606 GN=CAPZB PE=1 SV=1	4	8	8	8	43.5	43.5	43.5	29.295	260	0	32.266	30323000	9
B4DKY1	CARS1	Cysteine--tRNA ligase, cytoplasmic OS=Homo sapiens OX=9606 GN=CARS PE=1 SV=1	5	2	2	2	3.1	3.1	3.1	84.277	739	0	4.1895	1302800	2
P04040	CAT	Catalase OS=Homo sapiens OX=9606 GN=CAT PE=1 SV=3	1	8	8	8	24.1	24.1	24.1	59.755	527	0	13.049	7952100	10
Q6NZI2	CAVIN1	Caveolae-associated protein 1 OS=Homo sapiens OX=9606 GN=CAVIN1 PE=1 SV=1	1	2	2	2	6.2	6.2	6.2	43.476	390	0.0020704	1.5447	3813700	2
E9PQ63	CBR1	Carbonyl reductase [NADPH] 1 OS=Homo sapiens OX=9606 GN=CBR1 PE=1 SV=1	3	5	5	2	33.1	33.1	12.4	19.022	178	0	10.175	18617000	5
Q13185	CBX3	Chromobox protein homolog 3 OS=Homo sapiens OX=9606 GN=CBX3 PE=1 SV=4	4	4	4	4	27.3	27.3	27.3	20.811	183	0	8.3269	5310000	3
P78371	CCT2	T-complex protein 1 subunit beta OS=Homo sapiens OX=9606 GN=CCT2 PE=1 SV=4	3	12	12	12	35	35	35	57.488	535	0	38.43	56120000	12
P49368	CCT3	T-complex protein 1 subunit gamma OS=Homo sapiens OX=9606 GN=CCT3 PE=1 SV=4	8	16	16	16	34.7	34.7	34.7	60.533	545	0	33.441	38481000	20
P50991	CCT4	T-complex protein 1 subunit delta OS=Homo sapiens OX=9606 GN=CCT4 PE=1 SV=4	1	6	6	6	15.2	15.2	15.2	57.924	539	0	10.702	16640000	4
E7ENZ3	CCT5	T-complex protein 1 subunit epsilon OS=Homo sapiens OX=9606 GN=CCT5 PE=1 SV=1	6	8	8	8	20.8	20.8	20.8	53.848	486	0	15.754	22279000	9
P40227	CCT6A	T-complex protein 1 subunit zeta OS=Homo sapiens OX=9606 GN=CCT6A PE=1 SV=3	1	9	9	9	20.2	20.2	20.2	58.024	531	0	17.756	15214000	10
Q99832	CCT7	T-complex protein 1 subunit eta OS=Homo sapiens OX=9606 GN=CCT7 PE=1 SV=2	2	11	11	11	27.8	27.8	27.8	59.366	543	0	28.334	24626000	13
P50990	CCT8	T-complex protein 1 subunit theta OS=Homo sapiens OX=9606 GN=CCT8 PE=1 SV=4	2	16	16	16	33	33	33	59.62	548	0	29.201	65553000	22
H0YD13	CD44	CD44 antigen OS=Homo sapiens OX=9606 GN=CD44 PE=1 SV=2	12	5	5	5	26.2	26.2	26.2	22.683	206	0	8.2458	18403000	8
P32320	CDA	Cytidine deaminase OS=Homo sapiens OX=9606 GN=CDA PE=1 SV=2	1	3	3	3	35.6	35.6	35.6	16.185	146	0	3.8088	10199000	4
Q16543	CDC37	Hsp90 co-chaperone Cdc37 OS=Homo sapiens OX=9606 GN=CDC37 PE=1 SV=1	5	6	6	6	26.7	26.7	26.7	44.468	378	0	11.235	10771000	7
P60953	CDC42	Cell division control protein 42 homolog OS=Homo sapiens OX=9606 GN=CDC42 PE=1 SV=2	11	6	5	5	34	28.3	28.3	21.258	191	0	7.9016	19770000	6
A0A024QZP7	CDK1	Cell division cycle 2, G1 to S and G2 to M, isoform CRA_a OS=Homo sapiens OX=9606 GN=CDK1 PE=1 SV=1	36	6	6	5	25.3	25.3	22.6	34.081	297	0	12.312	11451000	7
Q00534	CDK6	Cyclin-dependent kinase 6 OS=Homo sapiens OX=9606 GN=CDK6 PE=1 SV=1	1	4	3	3	14.1	11.7	11.7	36.938	326	0	5.0247	3524600	3
P23528	CFL1	Cofilin-1 OS=Homo sapiens OX=9606 GN=CFL1 PE=1 SV=3	7	17	17	12	87.3	87.3	62	18.502	166	0	59.667	286910000	29
Q9UHD1	CHORDC1	Cysteine and histidine-rich domain-containing protein 1 OS=Homo sapiens OX=9606 GN=CHORDC1 PE=1 SV=2	6	5	5	5	22	22	22	37.489	332	0	14.361	8071300	7
P12277	CKB	Creatine kinase B-type OS=Homo sapiens OX=9606 GN=CKB PE=1 SV=1	4	6	6	6	24.4	24.4	24.4	42.644	381	0	19.166	14692000	7
O00299	CLIC1	Chloride intracellular channel protein 1 OS=Homo sapiens OX=9606 GN=CLIC1 PE=1 SV=4	1	12	12	12	54.4	54.4	54.4	26.922	241	0	40.548	84032000	12
Q9Y696	CLIC4	Chloride intracellular channel protein 4 OS=Homo sapiens OX=9606 GN=CLIC4 PE=1 SV=4	1	2	2	2	14.6	14.6	14.6	28.772	253	0	2.8765	1259600	1
Q00610	CLTC	Clathrin heavy chain 1 OS=Homo sapiens OX=9606 GN=CLTC PE=1 SV=5	4	3	3	3	2.3	2.3	2.3	191.61	1675	0	3.0253	1792800	3
P10909	CLU	Clusterin OS=Homo sapiens OX=9606 GN=CLU PE=1 SV=1	9	2	2	2	6.9	6.9	6.9	52.494	449	0	4.1206	1229200	1
Q5T0D2	CMPK1	UMP-CMP kinase OS=Homo sapiens OX=9606 GN=CMPK1 PE=1 SV=1	3	2	2	2	14.2	14.2	14.2	18.979	169	0	2.3061	1388400	2
Q96KP4	CNDP2	Cytosolic non-specific dipeptidase OS=Homo sapiens OX=9606 GN=CNDP2 PE=1 SV=2	3	2	2	2	5.7	5.7	5.7	52.878	475	0.0010929	1.8108	2029700	2
P09543	CNP	2',3'-cyclic-nucleotide 3'-phosphodiesterase OS=Homo sapiens OX=9606 GN=CNP PE=1 SV=2	5	2	2	2	5.7	5.7	5.7	47.578	421	0.0020683	1.5398	957450	0
Q9Y2B0	CNPY2	Protein canopy homolog 2 OS=Homo sapiens OX=9606 GN=CNPY2 PE=1 SV=1	8	3	3	3	22	22	22	20.652	182	0	5.921	3537000	2
Q9BT09	CNPY3	Protein canopy homolog 3 OS=Homo sapiens OX=9606 GN=CNPY3 PE=1 SV=1	1	3	3	3	14.4	14.4	14.4	30.748	278	0	5.503	3448600	2
Q9NXG0	CNTLN	Centlein OS=Homo sapiens OX=9606 GN=CNTLN PE=1 SV=6	1	2	2	2	1.1	1.1	1.1	161.57	1405	0.0010893	1.8011	4183100	1
Q8NBJ5	COLGALT1	Procollagen galactosyltransferase 1 OS=Homo sapiens OX=9606 GN=COLGALT1 PE=1 SV=1	3	5	5	5	8.4	8.4	8.4	71.635	622	0	9.1224	10550000	6
P21964	COMT	Catechol O-methyltransferase OS=Homo sapiens OX=9606 GN=COMT PE=1 SV=2	5	3	3	3	18.1	18.1	18.1	30.037	271	0	8.4492	8883800	3
Q9BT78	COPS4	COP9 signalosome complex subunit 4 OS=Homo sapiens OX=9606 GN=COPS4 PE=1 SV=1	4	2	2	2	5.9	5.9	5.9	46.268	406	0	3.2499	1457600	2
Q14019	COTL1	Coactosin-like protein OS=Homo sapiens OX=9606 GN=COTL1 PE=1 SV=3	2	9	9	9	75.4	75.4	75.4	15.945	142	0	25.106	19260000	11
Q86WV2	COX4I1	COX4I1 protein OS=Homo sapiens OX=9606 GN=COX4I1 PE=1 SV=1	6	2	2	2	28.9	28.9	28.9	9.2906	83	0	2.7107	3325200	2
P20674	COX5A	Cytochrome c oxidase subunit 5A, mitochondrial OS=Homo sapiens OX=9606 GN=COX5A PE=1 SV=2	5	2	2	2	16.7	16.7	16.7	16.762	150	0	3.8839	6855100	3
P10606	COX5B	Cytochrome c oxidase subunit 5B, mitochondrial OS=Homo sapiens OX=9606 GN=COX5B PE=1 SV=2	1	4	4	4	30.2	30.2	30.2	13.696	129	0	6.4562	5669200	6
E7ENH5	CPNE1	Copine-1 OS=Homo sapiens OX=9606 GN=CPNE1 PE=1 SV=1	13	2	2	2	7	7	7	47.174	427	0	3.6315	1978000	1
P31327	CPS1	Carbamoyl-phosphate synthase [ammonia], mitochondrial OS=Homo sapiens OX=9606 GN=CPS1 PE=1 SV=2	2	2	2	2	2.2	2.2	2.2	164.94	1500	0	2.702	1269000	2
P46108	CRK	Adapter molecule crk OS=Homo sapiens OX=9606 GN=CRK PE=1 SV=2	2	6	6	6	29.6	29.6	29.6	33.83	304	0	7.4052	8375400	6
C9JP16	CRTAP	Cartilage-associated protein OS=Homo sapiens OX=9606 GN=CRTAP PE=1 SV=1	2	6	6	6	19.3	19.3	19.3	41.432	358	0	16.736	8276400	7
P55060	CSE1L	Exportin-2 OS=Homo sapiens OX=9606 GN=CSE1L PE=1 SV=3	1	12	12	12	16.5	16.5	16.5	110.42	971	0	31.009	13122000	12
P21291	CSRP1	Cysteine and glycine-rich protein 1 OS=Homo sapiens OX=9606 GN=CSRP1 PE=1 SV=3	4	4	4	4	36.8	36.8	36.8	20.567	193	0	9.5875	9483200	4
P04080	CSTB	Cystatin-B OS=Homo sapiens OX=9606 GN=CSTB PE=1 SV=2	3	3	3	3	45.9	45.9	45.9	11.139	98	0	3.7854	9702800	4
P32929	CTH	Cystathionine gamma-lyase OS=Homo sapiens OX=9606 GN=CTH PE=1 SV=3	1	8	8	8	26.4	26.4	26.4	44.508	405	0	19.555	19028000	9
A0A3B3IRI2	CTPS1	CTP synthase OS=Homo sapiens OX=9606 GN=CTPS1 PE=1 SV=1	8	8	8	8	16.3	16.3	16.3	63.723	564	0	10.327	8458500	6
P10619	CTSA	Lysosomal protective protein OS=Homo sapiens OX=9606 GN=CTSA PE=1 SV=2	3	2	2	2	6.9	6.9	6.9	54.465	480	0.0048216	1.2191	2861900	2
Q14247	CTTN	Src substrate cortactin OS=Homo sapiens OX=9606 GN=CTTN PE=1 SV=2	1	2	2	2	5.1	5.1	5.1	61.585	550	0.0056711	1.1365	1355300	1
H3BUX2	CYB5B	Cytochrome b5 type B OS=Homo sapiens OX=9606 GN=CYB5B PE=1 SV=1	5	3	3	3	47.1	47.1	47.1	15.716	140	0	7.4453	56409000	6
P00387	CYB5R3	NADH-cytochrome b5 reductase 3 OS=Homo sapiens OX=9606 GN=CYB5R3 PE=1 SV=3	2	8	8	8	27.2	27.2	27.2	34.234	301	0	29.54	28832000	10
C9JFR7	CYCS	Cytochrome c (Fragment) OS=Homo sapiens OX=9606 GN=CYCS PE=1 SV=1	3	4	4	4	27.7	27.7	27.7	11.333	101	0	4.8534	13418000	4
Q9NUQ9	CYRIB	Protein FAM49B OS=Homo sapiens OX=9606 GN=FAM49B PE=1 SV=1	7	2	2	2	10.2	10.2	10.2	36.748	324	0	2.7257	4236300	2
P07108	DBI	Acyl-CoA-binding protein OS=Homo sapiens OX=9606 GN=DBI PE=1 SV=2	3	2	2	2	12.6	12.6	12.6	10.044	87	0.0010672	1.7079	2796200	2
Q96C86	DCPS	m7GpppX diphosphatase OS=Homo sapiens OX=9606 GN=DCPS PE=1 SV=2	2	6	6	6	18.7	18.7	18.7	38.608	337	0	12.061	15598000	8
F5GY55	DDB1	DNA damage-binding protein 1 OS=Homo sapiens OX=9606 GN=DDB1 PE=1 SV=1	7	9	9	9	10.4	10.4	10.4	121.71	1092	0	15.479	19545000	12
A0A0C4DGS1	DDOST	Dolichyl-diphosphooligosaccharide--protein glycosyltransferase 48 kDa subunit OS=Homo sapiens OX=9606 GN=DDOST PE=1 SV=1	3	4	4	4	8.4	8.4	8.4	48.799	439	0	3.9473	4942000	4
P30046	DDT	D-dopachrome decarboxylase OS=Homo sapiens OX=9606 GN=DDT PE=1 SV=3	4	4	4	4	40.7	40.7	40.7	12.712	118	0	12.9	39529000	6
B4DFG0	DEK	Protein DEK OS=Homo sapiens OX=9606 GN=DEK PE=1 SV=1	7	3	3	3	7.8	7.8	7.8	39.5	347	0	5.6103	1850100	3
O00273	DFFA	DNA fragmentation factor subunit alpha OS=Homo sapiens OX=9606 GN=DFFA PE=1 SV=1	2	3	3	3	12.1	12.1	12.1	36.521	331	0	4.4178	2537700	3
I3NI32	DHODH	Dihydroorotate dehydrogenase (quinone), mitochondrial OS=Homo sapiens OX=9606 GN=DHODH PE=1 SV=1	5	2	2	2	5.9	5.9	5.9	42.653	393	0	2.8285	1253000	1
O43143	DHX15	Pre-mRNA-splicing factor ATP-dependent RNA helicase DHX15 OS=Homo sapiens OX=9606 GN=DHX15 PE=1 SV=2	1	3	3	3	3.9	3.9	3.9	90.932	795	0	2.7947	2057600	1
Q9UBS4	DNAJB11	DnaJ homolog subfamily B member 11 OS=Homo sapiens OX=9606 GN=DNAJB11 PE=1 SV=1	2	5	5	5	21.5	21.5	21.5	40.513	358	0	9.2116	7127800	7
O43598	DNPH1	2'-deoxynucleoside 5'-phosphate N-hydrolase 1 OS=Homo sapiens OX=9606 GN=DNPH1 PE=1 SV=1	2	5	5	5	33.3	33.3	33.3	19.108	174	0	9.3268	14222000	5
Q9NY33	DPP3	Dipeptidyl peptidase 3 OS=Homo sapiens OX=9606 GN=DPP3 PE=1 SV=2	8	14	14	14	28	28	28	82.588	737	0	41.338	39408000	17
Q16555	DPYSL2	Dihydropyrimidinase-related protein 2 OS=Homo sapiens OX=9606 GN=DPYSL2 PE=1 SV=1	6	5	5	5	12.2	12.2	12.2	62.293	572	0	10.1	6498800	6
P60981	DSTN	Destrin OS=Homo sapiens OX=9606 GN=DSTN PE=1 SV=3	2	7	6	6	43	36.4	36.4	18.506	165	0	12.641	43267000	7
H0YNW5	DUT	Deoxyuridine 5'-triphosphate nucleotidohydrolase, mitochondrial OS=Homo sapiens OX=9606 GN=DUT PE=1 SV=1	8	6	6	6	47.9	47.9	47.9	17.827	167	0	20.223	55896000	7
Q9NR20	DYRK4	Dual specificity tyrosine-phosphorylation-regulated kinase 4 OS=Homo sapiens OX=9606 GN=DYRK4 PE=1 SV=2	2	2	2	2	3.3	3.3	3.3	59.608	520	0	1.9703	21697000	1
Q15125	EBP	3-beta-hydroxysteroid-Delta(8),Delta(7)-isomerase OS=Homo sapiens OX=9606 GN=EBP PE=1 SV=3	4	3	3	3	16.5	16.5	16.5	26.352	230	0	11.885	8720200	4
Q5VTE0	EEF1A1P5	Putative elongation factor 1-alpha-like 3 OS=Homo sapiens OX=9606 GN=EEF1A1P5 PE=5 SV=1	6	20	20	11	42.9	42.9	25.8	50.184	462	0	62.294	625720000	46
Q05639	EEF1A2	Elongation factor 1-alpha 2 OS=Homo sapiens OX=9606 GN=EEF1A2 PE=1 SV=1	5	15	6	6	36.3	17.5	17.5	50.47	463	0	13.051	99308000	8
E9PMW7	EEF1D	Elongation factor 1-delta OS=Homo sapiens OX=9606 GN=EEF1D PE=1 SV=1	19	4	4	4	45.4	45.4	45.4	14.18	130	0	19.407	16514000	6
P26641	EEF1G	Elongation factor 1-gamma OS=Homo sapiens OX=9606 GN=EEF1G PE=1 SV=3	1	10	10	10	28.1	28.1	28.1	50.118	437	0	19.762	40564000	12
P13639	EEF2	Elongation factor 2 OS=Homo sapiens OX=9606 GN=EEF2 PE=1 SV=4	4	34	34	34	46.9	46.9	46.9	95.337	858	0	124.83	238170000	52
Q96C19	EFHD2	EF-hand domain-containing protein D2 OS=Homo sapiens OX=9606 GN=EFHD2 PE=1 SV=1	5	4	4	3	16.2	16.2	11.7	26.697	240	0	7.4158	8596000	3
P00533	EGFR	Epidermal growth factor receptor OS=Homo sapiens OX=9606 GN=EGFR PE=1 SV=2	12	7	7	7	7.4	7.4	7.4	134.28	1210	0	10.877	7501200	6
Q14232	EIF2B1	Translation initiation factor eIF-2B subunit alpha OS=Homo sapiens OX=9606 GN=EIF2B1 PE=1 SV=1	3	2	2	2	7.2	7.2	7.2	33.712	305	0	3.5126	1588200	2
P05198	EIF2S1	Eukaryotic translation initiation factor 2 subunit 1 OS=Homo sapiens OX=9606 GN=EIF2S1 PE=1 SV=3	3	3	3	3	11.4	11.4	11.4	36.112	315	0	4.6208	4282500	4
P20042	EIF2S2	Eukaryotic translation initiation factor 2 subunit 2 OS=Homo sapiens OX=9606 GN=EIF2S2 PE=1 SV=2	1	3	3	3	9.3	9.3	9.3	38.388	333	0	3.6405	3123200	3
P41091	EIF2S3	Eukaryotic translation initiation factor 2 subunit 3 OS=Homo sapiens OX=9606 GN=EIF2S3 PE=1 SV=3	3	11	11	11	31.8	31.8	31.8	51.109	472	0	28.668	23865000	12
P55884	EIF3B	Eukaryotic translation initiation factor 3 subunit B OS=Homo sapiens OX=9606 GN=EIF3B PE=1 SV=3	2	3	3	3	3.6	3.6	3.6	92.48	814	0	6.9359	4755100	2
O75822	EIF3J	Eukaryotic translation initiation factor 3 subunit J OS=Homo sapiens OX=9606 GN=EIF3J PE=1 SV=2	2	3	3	3	12	12	12	29.062	258	0	5.2564	3941600	2
K7ES31	EIF3K	Eukaryotic translation initiation factor 3 subunit K OS=Homo sapiens OX=9606 GN=EIF3K PE=1 SV=1	5	2	2	2	21.2	21.2	21.2	15.875	137	0.0020202	1.4549	0	2
J3KNJ2	EIF3M	Eukaryotic translation initiation factor 3 subunit M (Fragment) OS=Homo sapiens OX=9606 GN=EIF3M PE=1 SV=1	4	2	2	2	19.9	19.9	19.9	21.692	191	0.0010741	1.739	5259800	3
P60842	EIF4A1	Eukaryotic initiation factor 4A-I OS=Homo sapiens OX=9606 GN=EIF4A1 PE=1 SV=1	17	16	16	6	37.4	37.4	16.5	46.153	406	0	43.808	73258000	18
F8VX11	EIF4B	Eukaryotic translation initiation factor 4B (Fragment) OS=Homo sapiens OX=9606 GN=EIF4B PE=1 SV=1	8	2	2	2	11.4	11.4	11.4	41.454	360	0	8.9689	5173500	4
P06730	EIF4E	Eukaryotic translation initiation factor 4E OS=Homo sapiens OX=9606 GN=EIF4E PE=1 SV=2	3	2	2	2	9.7	9.7	9.7	25.097	217	0.0011013	1.8491	441610	1
E7EX73	EIF4G1	Eukaryotic translation initiation factor 4 gamma 1 OS=Homo sapiens OX=9606 GN=EIF4G1 PE=1 SV=1	9	5	5	5	4.9	4.9	4.9	158.64	1436	0	8.0732	7459900	4
Q15056	EIF4H	Eukaryotic translation initiation factor 4H OS=Homo sapiens OX=9606 GN=EIF4H PE=1 SV=5	1	3	3	3	19.8	19.8	19.8	27.385	248	0	25.84	2700300	2
F8WCJ1	EIF5A2	Eukaryotic translation initiation factor 5A OS=Homo sapiens OX=9606 GN=EIF5A2 PE=1 SV=1	8	4	4	4	36.2	36.2	36.2	11.687	105	0	7.3667	9190800	3
P56537	EIF6	Eukaryotic translation initiation factor 6 OS=Homo sapiens OX=9606 GN=EIF6 PE=1 SV=1	6	4	4	4	28.6	28.6	28.6	26.599	245	0	12.154	15467000	3
B8ZZU8	ELOB	Elongin-B OS=Homo sapiens OX=9606 GN=ELOB PE=1 SV=1	4	6	6	6	56.6	56.6	56.6	12.527	113	0	10.394	10122000	6
R4GMY8	ELOC	Elongin-C OS=Homo sapiens OX=9606 GN=ELOC PE=1 SV=1	3	2	2	2	35.4	35.4	35.4	6.968	65	0.0020346	1.4723	4672900	0
P06733	ENO1	Alpha-enolase OS=Homo sapiens OX=9606 GN=ENO1 PE=1 SV=2	9	38	38	35	81.3	81.3	72.8	47.168	434	0	223.31	1233200000	84
P09104	ENO2	Gamma-enolase OS=Homo sapiens OX=9606 GN=ENO2 PE=1 SV=3	4	8	5	4	26	13.4	11.5	47.268	434	0	8.7737	16155000	6
P13929	ENO3	Beta-enolase OS=Homo sapiens OX=9606 GN=ENO3 PE=1 SV=5	8	7	3	3	24	9.4	9.4	46.986	434	0	5.1476	2899400	4
P07099	EPHX1	Epoxide hydrolase 1 OS=Homo sapiens OX=9606 GN=EPHX1 PE=1 SV=1	3	5	5	5	17.6	17.6	17.6	52.948	455	0	13.915	15641000	7
P07814	EPRS1	Bifunctional glutamate/proline--tRNA ligase OS=Homo sapiens OX=9606 GN=EPRS PE=1 SV=5	2	7	7	7	5.2	5.2	5.2	170.59	1512	0	10.997	17692000	8
Q969X5	ERGIC1	Endoplasmic reticulum-Golgi intermediate compartment protein 1 OS=Homo sapiens OX=9606 GN=ERGIC1 PE=1 SV=1	1	6	6	6	23.8	23.8	23.8	32.592	290	0	8.3154	39314000	9
E5RHW4	ERLIN2	Erlin-2 (Fragment) OS=Homo sapiens OX=9606 GN=ERLIN2 PE=1 SV=1	5	2	2	2	7.1	7.1	7.1	37.725	338	0.0020921	1.6188	133440	1
Q96HE7	ERO1A	ERO1-like protein alpha OS=Homo sapiens OX=9606 GN=ERO1A PE=1 SV=2	6	11	11	11	25.6	25.6	25.6	54.392	468	0	41.701	22126000	11
P30040	ERP29	Endoplasmic reticulum resident protein 29 OS=Homo sapiens OX=9606 GN=ERP29 PE=1 SV=4	3	8	8	8	38.3	38.3	38.3	28.993	261	0	21.73	76537000	13
Q9BS26	ERP44	Endoplasmic reticulum resident protein 44 OS=Homo sapiens OX=9606 GN=ERP44 PE=1 SV=1	1	11	11	11	30	30	30	46.971	406	0	24.903	46021000	13
Q9BSJ8	ESYT1	Extended synaptotagmin-1 OS=Homo sapiens OX=9606 GN=ESYT1 PE=1 SV=1	2	2	2	2	2.4	2.4	2.4	122.85	1104	0.0020619	1.5251	2389800	2
P62495	ETF1	Eukaryotic peptide chain release factor subunit 1 OS=Homo sapiens OX=9606 GN=ETF1 PE=1 SV=3	5	4	4	4	12.6	12.6	12.6	49.03	437	0	11.342	5295900	4
E7EQR4	EZR	Ezrin OS=Homo sapiens OX=9606 GN=EZR PE=1 SV=3	5	20	12	11	29.9	21.7	20.3	69.371	586	0	25.608	33696000	14
B3KT28	FAF1	FAS-associated factor 1 OS=Homo sapiens OX=9606 GN=FAF1 PE=1 SV=1	3	2	2	2	6.9	6.9	6.9	53.653	464	0	2.9839	1621400	2
Q8IWE2	FAM114A1	Protein NOXP20 OS=Homo sapiens OX=9606 GN=FAM114A1 PE=1 SV=2	1	2	2	2	5.7	5.7	5.7	60.741	563	0	3.475	1956600	3
F8W7Q4	FAM162A	Protein FAM162A OS=Homo sapiens OX=9606 GN=FAM162A PE=1 SV=1	3	2	2	2	13.2	13.2	13.2	16.515	144	0	4.0332	3224100	1
A0A0U1RQF0	FASN	Fatty acid synthase OS=Homo sapiens OX=9606 GN=FASN PE=1 SV=1	2	5	5	5	3.6	3.6	3.6	273.2	2509	0	6.6415	2271300	4
P62861	FAU	40S ribosomal protein S30 OS=Homo sapiens OX=9606 GN=FAU PE=1 SV=1	2	2	2	2	18.6	18.6	18.6	6.6478	59	0	4.6255	3937200	2
A0A286YF37	FBXO2	F-box only protein 2 (Fragment) OS=Homo sapiens OX=9606 GN=FBXO2 PE=1 SV=1	3	4	4	4	18.3	18.3	18.3	30.299	268	0	9.0809	6205300	4
Q8NEZ5	FBXO22	F-box only protein 22 OS=Homo sapiens OX=9606 GN=FBXO22 PE=1 SV=1	4	2	2	2	8.7	8.7	8.7	44.508	403	0	8.045	4017300	1
P14324	FDPS	Farnesyl pyrophosphate synthase OS=Homo sapiens OX=9606 GN=FDPS PE=1 SV=4	5	9	9	9	23.2	23.2	23.2	48.275	419	0	49.675	78973000	13
P07954	FH	Fumarate hydratase, mitochondrial OS=Homo sapiens OX=9606 GN=FH PE=1 SV=3	1	2	2	2	6.3	6.3	6.3	54.636	510	0.0010582	1.6676	2068800	1
Q96AY3	FKBP10	Peptidyl-prolyl cis-trans isomerase FKBP10 OS=Homo sapiens OX=9606 GN=FKBP10 PE=1 SV=1	5	7	7	7	14.3	14.3	14.3	64.244	582	0	15.391	28874000	9
Q5W0X3	FKBP1A	Peptidylprolyl isomerase OS=Homo sapiens OX=9606 GN=FKBP1A PE=1 SV=1	5	3	3	3	40.8	40.8	40.8	11.424	103	0	6.6615	5118700	2
Q02790	FKBP4	Peptidyl-prolyl cis-trans isomerase FKBP4 OS=Homo sapiens OX=9606 GN=FKBP4 PE=1 SV=3	3	16	16	16	48.1	48.1	48.1	51.804	459	0	57.843	61096000	25
A0A087WWY3	FLNA	Filamin-A OS=Homo sapiens OX=9606 GN=FLNA PE=1 SV=1	6	26	26	25	15.6	15.6	15.2	245.85	2315	0	60.376	42047000	25
O75369	FLNB	Filamin-B OS=Homo sapiens OX=9606 GN=FLNB PE=1 SV=2	3	5	4	4	2.5	2.2	2.2	278.16	2602	0	4.7408	3103100	5
I3L4I0	FLYWCH2	FLYWCH family member 2 (Fragment) OS=Homo sapiens OX=9606 GN=FLYWCH2 PE=1 SV=1	3	2	2	2	33	33	33	9.56	91	0	2.7835	1667300	2
P15328	FOLR1	Folate receptor alpha OS=Homo sapiens OX=9606 GN=FOLR1 PE=1 SV=3	1	10	10	10	36.6	36.6	36.6	29.819	257	0	23.206	19918000	6
P85037	FOXK1	Forkhead box protein K1 OS=Homo sapiens OX=9606 GN=FOXK1 PE=1 SV=1	2	5	5	5	7.2	7.2	7.2	75.456	733	0	6.5912	6294000	4
Q16658	FSCN1	Fascin OS=Homo sapiens OX=9606 GN=FSCN1 PE=1 SV=3	4	8	8	8	19.5	19.5	19.5	54.529	493	0	25.013	64565000	11
G3V192	FTH1	Ferritin OS=Homo sapiens OX=9606 GN=FTH1 PE=1 SV=1	6	5	5	5	30.7	30.7	30.7	17.653	153	0	13.062	15529000	8
A0A1B0GTY1	FTO	Alpha-ketoglutarate-dependent dioxygenase FTO OS=Homo sapiens OX=9606 GN=FTO PE=1 SV=1	9	4	4	4	14	14	14	48.605	421	0	7.3326	7576300	3
Q96AE4	FUBP1	Far upstream element-binding protein 1 OS=Homo sapiens OX=9606 GN=FUBP1 PE=1 SV=3	3	2	2	2	4	4	4	67.56	644	0	2.8461	1408600	1
Q13283	G3BP1	Ras GTPase-activating protein-binding protein 1 OS=Homo sapiens OX=9606 GN=G3BP1 PE=1 SV=1	2	3	3	3	6.2	6.2	6.2	52.164	466	0	5.0911	2561900	4
P11413	G6PD	Glucose-6-phosphate 1-dehydrogenase OS=Homo sapiens OX=9606 GN=G6PD PE=1 SV=4	4	24	24	24	48.9	48.9	48.9	59.256	515	0	62.092	144270000	35
Q96C23	GALM	Aldose 1-epimerase OS=Homo sapiens OX=9606 GN=GALM PE=1 SV=1	4	4	4	4	16.4	16.4	16.4	37.765	342	0	5.1328	5953800	3
Q14697	GANAB	Neutral alpha-glucosidase AB OS=Homo sapiens OX=9606 GN=GANAB PE=1 SV=3	4	36	36	36	46.7	46.7	46.7	106.87	944	0	104.19	416690000	60
P04406	GAPDH	Glyceraldehyde-3-phosphate dehydrogenase OS=Homo sapiens OX=9606 GN=GAPDH PE=1 SV=3	3	33	33	33	80	80	80	36.053	335	0	306.75	1736500000	68
P41250	GARS1	Glycine--tRNA ligase OS=Homo sapiens OX=9606 GN=GARS PE=1 SV=3	1	26	26	26	40.3	40.3	40.3	83.165	739	0	83.644	179980000	44
P22102	GART	Trifunctional purine biosynthetic protein adenosine-3 OS=Homo sapiens OX=9606 GN=GART PE=1 SV=1	6	5	5	5	7.2	7.2	7.2	107.77	1010	0	14.752	16607000	7
A0A0G2JNZ5	GBA	Glucosylceramidase OS=Homo sapiens OX=9606 GN=GBA PE=1 SV=1	4	4	4	4	7.1	7.1	7.1	50.263	449	0	4.3469	6528300	6
Q9Y2T3	GDA	Guanine deaminase OS=Homo sapiens OX=9606 GN=GDA PE=1 SV=1	5	28	28	28	74.7	74.7	74.7	51.002	454	0	181.53	292700000	49
P31150	GDI1	Rab GDP dissociation inhibitor alpha OS=Homo sapiens OX=9606 GN=GDI1 PE=1 SV=2	1	9	3	3	20.8	7.8	7.8	50.582	447	0	4.067	2022000	3
P50395	GDI2	Rab GDP dissociation inhibitor beta OS=Homo sapiens OX=9606 GN=GDI2 PE=1 SV=2	8	18	18	12	49.4	49.4	36.4	50.663	445	0	102.96	90542000	27
E9PKL9	GFUS	GDP-L-fucose synthase (Fragment) OS=Homo sapiens OX=9606 GN=TSTA3 PE=1 SV=1	6	2	2	2	10.1	10.1	10.1	29.666	268	0	3.6134	9412700	2
O14908	GIPC1	PDZ domain-containing protein GIPC1 OS=Homo sapiens OX=9606 GN=GIPC1 PE=1 SV=2	3	2	2	2	6.3	6.3	6.3	36.049	333	0	3.8144	1529800	2
P06280	GLA	Alpha-galactosidase A OS=Homo sapiens OX=9606 GN=GLA PE=1 SV=1	4	2	2	2	5.4	5.4	5.4	48.766	429	0	2.0356	2310100	2
Q92896	GLG1	Golgi apparatus protein 1 OS=Homo sapiens OX=9606 GN=GLG1 PE=1 SV=2	3	5	5	5	5.5	5.5	5.5	134.55	1179	0	11.563	9287700	6
Q04760	GLO1	Lactoylglutathione lyase OS=Homo sapiens OX=9606 GN=GLO1 PE=1 SV=4	1	5	5	5	26.1	26.1	26.1	20.777	184	0	8.0328	103650000	7
Q9HC38	GLOD4	Glyoxalase domain-containing protein 4 OS=Homo sapiens OX=9606 GN=GLOD4 PE=1 SV=1	9	4	4	4	12.1	12.1	12.1	34.793	313	0	6.191	5857500	4
P49915	GMPS	GMP synthase [glutamine-hydrolyzing] OS=Homo sapiens OX=9606 GN=GMPS PE=1 SV=1	1	9	9	9	18.2	18.2	18.2	76.715	693	0	13.737	10134000	9
P04899	GNAI2	Guanine nucleotide-binding protein G(i) subunit alpha-2 OS=Homo sapiens OX=9606 GN=GNAI2 PE=1 SV=3	1	6	5	4	29.6	26.5	23.1	40.45	355	0	7.2025	9273600	6
P08754	GNAI3	Guanine nucleotide-binding protein G(i) subunit alpha OS=Homo sapiens OX=9606 GN=GNAI3 PE=1 SV=3	1	4	2	2	13.6	7.1	7.1	40.532	354	0	4.767	6050300	2
P63092	GNAS	Guanine nucleotide-binding protein G(s) subunit alpha isoforms short OS=Homo sapiens OX=9606 GN=GNAS PE=1 SV=1	20	8	8	7	23.1	23.1	20.3	45.664	394	0	16.76	27790000	13
P62873	GNB1	Guanine nucleotide-binding protein G(I)/G(S)/G(T) subunit beta-1 OS=Homo sapiens OX=9606 GN=GNB1 PE=1 SV=3	11	7	7	3	24.1	24.1	12.6	37.377	340	0	32.193	28619000	9
Q9UBI6	GNG12	Guanine nucleotide-binding protein G(I)/G(S)/G(O) subunit gamma-12 OS=Homo sapiens OX=9606 GN=GNG12 PE=1 SV=3	1	2	2	2	45.8	45.8	45.8	8.0061	72	0	3.4642	2263900	2
P17174	GOT1	Aspartate aminotransferase, cytoplasmic OS=Homo sapiens OX=9606 GN=GOT1 PE=1 SV=3	1	19	19	19	53	53	53	46.247	413	0	105.78	137790000	25
P00505	GOT2	Aspartate aminotransferase, mitochondrial OS=Homo sapiens OX=9606 GN=GOT2 PE=1 SV=3	1	8	8	8	22.3	22.3	22.3	47.517	430	0	26.423	19146000	7
P43304	GPD2	Glycerol-3-phosphate dehydrogenase, mitochondrial OS=Homo sapiens OX=9606 GN=GPD2 PE=1 SV=3	1	2	2	2	2.8	2.8	2.8	80.852	727	0	3.2412	3331800	2
P06744	GPI	Glucose-6-phosphate isomerase OS=Homo sapiens OX=9606 GN=GPI PE=1 SV=4	20	21	21	15	51.8	51.8	41.6	63.146	558	0	80.792	149220000	28
A0A2R8Y6B6	GPX1	Glutathione peroxidase 1 OS=Homo sapiens OX=9606 GN=GPX1 PE=1 SV=1	3	2	2	2	19.1	19.1	19.1	16.914	157	0	4.2735	4374200	4
E7ETY7	GPX8	Glutathione peroxidase OS=Homo sapiens OX=9606 GN=GPX8 PE=1 SV=1	2	3	3	3	21.5	21.5	21.5	18.09	158	0	2.6444	5756800	1
K7EKL3	GRN	Progranulin (Fragment) OS=Homo sapiens OX=9606 GN=GRN PE=1 SV=1	5	2	2	2	8	8	8	41.238	388	0.0020877	1.603	674190	2
O60443	GSDME	Gasdermin-E OS=Homo sapiens OX=9606 GN=GSDME PE=1 SV=2	2	4	4	4	12.1	12.1	12.1	54.554	496	0	12.974	5234200	3
H3BR35	GSPT1	Eukaryotic peptide chain release factor GTP-binding subunit ERF3A (Fragment) OS=Homo sapiens OX=9606 GN=GSPT1 PE=1 SV=1	4	2	2	2	4.4	4.4	4.4	52.832	475	0	6.3743	10273000	3
P00390	GSR	Glutathione reductase, mitochondrial OS=Homo sapiens OX=9606 GN=GSR PE=1 SV=2	2	4	4	4	11.3	11.3	11.3	56.256	522	0	6.9267	10075000	4
A0A2R8Y430	GSS	Glutathione synthetase OS=Homo sapiens OX=9606 GN=GSS PE=1 SV=1	12	9	9	9	22.9	22.9	22.9	49.976	450	0	22.659	42549000	13
P09488	GSTM1	Glutathione S-transferase Mu 1 OS=Homo sapiens OX=9606 GN=GSTM1 PE=1 SV=3	5	6	6	2	33.9	33.9	8.7	25.712	218	0	12.706	17965000	5
P21266	GSTM3	Glutathione S-transferase Mu 3 OS=Homo sapiens OX=9606 GN=GSTM3 PE=1 SV=3	2	11	11	10	46.2	46.2	46.2	26.559	225	0	26.509	30253000	11
P78417	GSTO1	Glutathione S-transferase omega-1 OS=Homo sapiens OX=9606 GN=GSTO1 PE=1 SV=2	3	10	10	10	32.8	32.8	32.8	27.566	241	0	21.135	60430000	12
P09211	GSTP1	Glutathione S-transferase P OS=Homo sapiens OX=9606 GN=GSTP1 PE=1 SV=2	5	6	6	6	44.8	44.8	44.8	23.356	210	0	65.145	43915000	7
Q92522	H1-10	Histone H1x OS=Homo sapiens OX=9606 GN=H1FX PE=1 SV=1	4	2	2	2	10.3	10.3	10.3	22.487	213	0.0020812	1.5922	1893000	1
P16403	H1-2	Histone H1.2 OS=Homo sapiens OX=9606 GN=HIST1H1C PE=1 SV=2	1	7	7	2	28.2	28.2	9.9	21.364	213	0	18.656	44076000	9
P16401	H1-5	Histone H1.5 OS=Homo sapiens OX=9606 GN=HIST1H1B PE=1 SV=3	1	4	4	4	21.2	21.2	21.2	22.58	226	0	5.95	8378200	5
Q99878	H2AC14	Histone H2A type 1-J OS=Homo sapiens OX=9606 GN=HIST1H2AJ PE=1 SV=3	10	6	6	2	35.9	35.9	14.1	13.936	128	0	56.545	142620000	5
Q93077	H2AC6	Histone H2A type 1-C OS=Homo sapiens OX=9606 GN=HIST1H2AC PE=1 SV=3	9	6	2	2	35.4	13.8	13.8	14.105	130	0	4.4976	8614600	3
K7EK07	H3-3B	Histone H3 (Fragment) OS=Homo sapiens OX=9606 GN=H3F3B PE=1 SV=1	13	10	10	5	61.4	61.4	39.4	14.914	132	0	13.858	210840000	15
P62805	H4-16	Histone H4 OS=Homo sapiens OX=9606 GN=HIST1H4A PE=1 SV=2	1	14	14	14	62.1	62.1	62.1	11.367	103	0	50.063	175930000	25
B3KWE1	HARS1	Histidine--tRNA ligase, cytoplasmic OS=Homo sapiens OX=9606 GN=HARS PE=1 SV=1	12	6	6	6	15.7	15.7	15.7	49.623	440	0	11.382	8283800	7
P51610	HCFC1	Host cell factor 1 OS=Homo sapiens OX=9606 GN=HCFC1 PE=1 SV=2	2	2	2	2	1.4	1.4	1.4	208.73	2035	0	2.8043	1367600	2
V9GYS5	HDDC2	HD domain-containing protein 2 OS=Homo sapiens OX=9606 GN=HDDC2 PE=1 SV=1	3	2	2	2	19.6	19.6	19.6	12.276	107	0	4.3413	2007000	3
P51858	HDGF	Hepatoma-derived growth factor OS=Homo sapiens OX=9606 GN=HDGF PE=1 SV=1	1	6	6	6	49.6	49.6	49.6	26.788	240	0	37.229	40686000	12
Q9NRV9	HEBP1	Heme-binding protein 1 OS=Homo sapiens OX=9606 GN=HEBP1 PE=1 SV=1	4	5	5	5	36.5	36.5	36.5	21.097	189	0	9.4351	6423200	6
H3BS10	HEXA	Beta-hexosaminidase OS=Homo sapiens OX=9606 GN=HEXA PE=1 SV=1	6	4	4	4	8.3	8.3	8.3	58.44	509	0	10.199	7358500	4
P07686	HEXB	Beta-hexosaminidase subunit beta OS=Homo sapiens OX=9606 GN=HEXB PE=1 SV=3	15	8	8	8	17.8	17.8	17.8	63.111	556	0	14.608	23940000	12
E9PPG8	HIKESHI	Protein Hikeshi OS=Homo sapiens OX=9606 GN=HIKESHI PE=1 SV=1	4	2	2	2	14.9	14.9	14.9	21.069	194	0	10.427	7109600	3
P01891	HLA-A	HLA class I histocompatibility antigen, A-68 alpha chain OS=Homo sapiens OX=9606 GN=HLA-A PE=1 SV=4	54	9	9	4	37	37	15.3	40.908	365	0	22.297	22755000	14
A0A1W2PR11	HLA-C	HLA class I histocompatibility antigen, Cw-6 alpha chain OS=Homo sapiens OX=9606 GN=HLA-C PE=1 SV=1	54	8	5	2	39.7	24.9	11.4	36.848	325	0	12.212	5372700	4
F5H345	HMBS	Porphobilinogen deaminase OS=Homo sapiens OX=9606 GN=HMBS PE=1 SV=1	13	4	4	4	14.8	14.8	14.8	35.761	330	0	3.795	3865200	1
P09429	HMGB1	High mobility group protein B1 OS=Homo sapiens OX=9606 GN=HMGB1 PE=1 SV=3	5	10	10	10	36.7	36.7	36.7	24.893	215	0	25.177	44349000	14
Q01581	HMGCS1	Hydroxymethylglutaryl-CoA synthase, cytoplasmic OS=Homo sapiens OX=9606 GN=HMGCS1 PE=1 SV=2	2	9	9	9	26.5	26.5	26.5	57.293	520	0	62.564	15565000	11
P30519	HMOX2	Heme oxygenase 2 OS=Homo sapiens OX=9606 GN=HMOX2 PE=1 SV=2	5	4	4	4	16.5	16.5	16.5	36.032	316	0	6.9	5339200	6
F8W6I7	HNRNPA1	Heterogeneous nuclear ribonucleoprotein A1 OS=Homo sapiens OX=9606 GN=HNRNPA1 PE=1 SV=2	9	7	7	7	34.9	34.9	34.9	33.155	307	0	20.202	10392000	7
P22626	HNRNPA2B1	Heterogeneous nuclear ribonucleoproteins A2/B1 OS=Homo sapiens OX=9606 GN=HNRNPA2B1 PE=1 SV=2	2	12	12	12	39.7	39.7	39.7	37.429	353	0	27.204	23435000	12
G3V576	HNRNPC	Heterogeneous nuclear ribonucleoproteins C1/C2 OS=Homo sapiens OX=9606 GN=HNRNPC PE=1 SV=1	23	6	6	6	22.9	22.9	22.9	25.256	231	0	12.672	30145000	9
H0YA96	HNRNPD	Heterogeneous nuclear ribonucleoprotein D0 (Fragment) OS=Homo sapiens OX=9606 GN=HNRNPD PE=1 SV=1	9	6	6	6	29.5	29.5	29.5	23.811	210	0	10.838	18015000	9
P61978	HNRNPK	Heterogeneous nuclear ribonucleoprotein K OS=Homo sapiens OX=9606 GN=HNRNPK PE=1 SV=1	4	10	10	10	29.6	29.6	29.6	50.976	463	0	20.733	14687000	11
A0A087X0X3	HNRNPM	Heterogeneous nuclear ribonucleoprotein M OS=Homo sapiens OX=9606 GN=HNRNPM PE=1 SV=1	8	4	4	4	9	9	9	77.569	730	0	9.5964	5432000	6
A0A1W2PPS1	HNRNPU	Heterogeneous nuclear ribonucleoprotein U OS=Homo sapiens OX=9606 GN=HNRNPU PE=1 SV=1	15	16	16	16	25.4	25.4	25.4	88.317	804	0	53.313	34093000	13
P00492	HPRT1	Hypoxanthine-guanine phosphoribosyltransferase OS=Homo sapiens OX=9606 GN=HPRT1 PE=1 SV=2	1	16	16	14	71.6	71.6	67.9	24.579	218	0	62.808	151330000	28
A0A1B0GV93	HSD17B12	Very-long-chain 3-oxoacyl-CoA reductase OS=Homo sapiens OX=9606 GN=HSD17B12 PE=1 SV=1	4	2	2	2	10.1	10.1	10.1	30.361	276	0.0010764	1.7549	1178200	0
P07900	HSP90AA1	Heat shock protein HSP 90-alpha OS=Homo sapiens OX=9606 GN=HSP90AA1 PE=1 SV=5	6	60	39	39	53.3	38	38	84.659	732	0	227.92	601640000	62
P08238	HSP90AB1	Heat shock protein HSP 90-beta OS=Homo sapiens OX=9606 GN=HSP90AB1 PE=1 SV=4	2	60	60	31	56.5	56.5	38.5	83.263	724	0	323.31	1333800000	91
P14625	HSP90B1	Endoplasmin OS=Homo sapiens OX=9606 GN=HSP90B1 PE=1 SV=1	6	50	48	48	58.9	57.2	57.2	92.468	803	0	215.02	726670000	89
P0DMV9	HSPA1B	Heat shock 70 kDa protein 1B OS=Homo sapiens OX=9606 GN=HSPA1B PE=1 SV=1	4	31	29	19	48.7	45.2	30.9	70.051	641	0	113.75	265960000	50
P34932	HSPA4	Heat shock 70 kDa protein 4 OS=Homo sapiens OX=9606 GN=HSPA4 PE=1 SV=4	3	32	32	30	46.1	46.1	43.1	94.33	840	0	98.833	239740000	44
E9PDE8	HSPA4L	Heat shock 70 kDa protein 4L OS=Homo sapiens OX=9606 GN=HSPA4L PE=1 SV=1	3	6	3	3	9.1	4.3	4.3	91.953	813	0	3.4884	2883100	2
P11021	HSPA5	Endoplasmic reticulum chaperone BiP OS=Homo sapiens OX=9606 GN=HSPA5 PE=1 SV=2	3	48	48	47	59.6	59.6	59.6	72.332	654	0	298.99	1001600000	65
P11142	HSPA8	Heat shock cognate 71 kDa protein OS=Homo sapiens OX=9606 GN=HSPA8 PE=1 SV=1	14	35	34	17	46.3	46.3	26	70.897	646	0	149.18	359860000	45
A8K7Q2	HSPA8	Heat shock cognate 71 kDa protein OS=Homo sapiens OX=9606 GN=HSPA8 PE=1 SV=1	1	18	2	2	28.8	2.4	2.4	45.338	410	0	3.3776	6019400	1
P04792	HSPB1	Heat shock protein beta-1 OS=Homo sapiens OX=9606 GN=HSPB1 PE=1 SV=2	3	8	8	8	51.2	51.2	51.2	22.782	205	0	19.86	67663000	17
P10809	HSPD1	60 kDa heat shock protein, mitochondrial OS=Homo sapiens OX=9606 GN=HSPD1 PE=1 SV=2	7	15	15	15	31.8	31.8	31.8	61.054	573	0	41.695	48408000	20
B8ZZL8	HSPE1	10 kDa heat shock protein, mitochondrial OS=Homo sapiens OX=9606 GN=HSPE1 PE=1 SV=1	4	2	2	2	27.7	27.7	27.7	10.689	101	0	3.6689	1853800	3
Q92598	HSPH1	Heat shock protein 105 kDa OS=Homo sapiens OX=9606 GN=HSPH1 PE=1 SV=1	4	17	15	14	21.2	18.3	16.7	96.864	858	0	25.703	50822000	15
Q9BUP3	HTATIP2	Oxidoreductase HTATIP2 OS=Homo sapiens OX=9606 GN=HTATIP2 PE=1 SV=2	2	3	3	3	12.8	12.8	12.8	27.049	242	0	6.0727	9563300	3
Q7Z6Z7	HUWE1	E3 ubiquitin-protein ligase HUWE1 OS=Homo sapiens OX=9606 GN=HUWE1 PE=1 SV=3	2	2	2	2	0.5	0.5	0.5	481.89	4374	0	2.8816	1020800	1
A0A087X054	HYOU1	Hypoxia up-regulated protein 1 OS=Homo sapiens OX=9606 GN=HYOU1 PE=1 SV=1	16	39	39	39	44.8	44.8	44.8	104.78	937	0	110.79	262520000	51
A0A3B3ISG5	IDE	Insulin-degrading enzyme OS=Homo sapiens OX=9606 GN=IDE PE=1 SV=1	3	4	4	4	5	5	5	117.94	1019	0	3.1273	3045500	5
O75874	IDH1	Isocitrate dehydrogenase [NADP] cytoplasmic OS=Homo sapiens OX=9606 GN=IDH1 PE=1 SV=2	4	7	7	7	23.2	23.2	23.2	46.659	414	0	15.31	13590000	12
Q14116	IL18	Interleukin-18 OS=Homo sapiens OX=9606 GN=IL18 PE=1 SV=1	1	4	4	4	26.4	26.4	26.4	22.326	193	0	8.8645	34670000	5
B4DY09	ILF2	Interleukin enhancer-binding factor 2 OS=Homo sapiens OX=9606 GN=ILF2 PE=1 SV=1	4	2	2	2	7.7	7.7	7.7	38.91	352	0	3.0592	6461500	2
Q12906	ILF3	Interleukin enhancer-binding factor 3 OS=Homo sapiens OX=9606 GN=ILF3 PE=1 SV=3	3	5	5	5	7.5	7.5	7.5	95.337	894	0	5.8853	4348600	5
A0A3B3IRL5	IMPDH1	Inosine-5'-monophosphate dehydrogenase (Fragment) OS=Homo sapiens OX=9606 GN=IMPDH1 PE=1 SV=1	3	3	2	2	9.2	7.7	7.7	54.272	509	0	1.9543	1163200	1
P12268	IMPDH2	Inosine-5'-monophosphate dehydrogenase 2 OS=Homo sapiens OX=9606 GN=IMPDH2 PE=1 SV=2	4	12	12	11	31.3	31.3	29.8	55.804	514	0	33.296	30243000	16
O00410	IPO5	Importin-5 OS=Homo sapiens OX=9606 GN=IPO5 PE=1 SV=4	18	12	12	12	15.8	15.8	15.8	123.63	1097	0	31.317	17353000	14
O95373	IPO7	Importin-7 OS=Homo sapiens OX=9606 GN=IPO7 PE=1 SV=1	3	14	14	14	15.5	15.5	15.5	119.52	1038	0	35.781	44474000	14
Q96P70	IPO9	Importin-9 OS=Homo sapiens OX=9606 GN=IPO9 PE=1 SV=3	1	4	4	4	6.1	6.1	6.1	115.96	1041	0	6.8254	10756000	6
P46940	IQGAP1	Ras GTPase-activating-like protein IQGAP1 OS=Homo sapiens OX=9606 GN=IQGAP1 PE=1 SV=1	8	28	28	28	19.1	19.1	19.1	189.25	1657	0	63.872	53072000	28
P08648	ITGA5	Integrin alpha-5 OS=Homo sapiens OX=9606 GN=ITGA5 PE=1 SV=2	1	5	5	5	7.3	7.3	7.3	114.54	1049	0	11.757	6819300	6
P05556	ITGB1	Integrin beta-1 OS=Homo sapiens OX=9606 GN=ITGB1 PE=1 SV=2	10	7	7	7	10	10	10	88.414	798	0	15.259	23246000	9
Q9BY32	ITPA	Inosine triphosphate pyrophosphatase OS=Homo sapiens OX=9606 GN=ITPA PE=1 SV=2	1	3	3	3	17	17	17	21.445	194	0	4.9352	5462400	3
Q15046	KARS1	Lysine--tRNA ligase OS=Homo sapiens OX=9606 GN=KARS PE=1 SV=3	5	3	3	3	7.2	7.2	7.2	68.047	597	0	9.7847	5665300	3
Q96CX2	KCTD12	BTB/POZ domain-containing protein KCTD12 OS=Homo sapiens OX=9606 GN=KCTD12 PE=1 SV=1	2	3	3	3	10.5	10.5	10.5	35.7	325	0	6.2532	3170000	3
A0A087WTP3	KHSRP	Far upstream element-binding protein 2 OS=Homo sapiens OX=9606 GN=KHSRP PE=1 SV=1	5	3	3	3	5.8	5.8	5.8	73.027	711	0	4.3813	3439600	3
P52292	KPNA2	Importin subunit alpha-1 OS=Homo sapiens OX=9606 GN=KPNA2 PE=1 SV=1	3	9	9	9	24.4	24.4	24.4	57.861	529	0	23.734	32774000	9
O00505	KPNA3	Importin subunit alpha-4 OS=Homo sapiens OX=9606 GN=KPNA3 PE=1 SV=2	1	3	3	2	6.7	6.7	3.8	57.81	521	0	4.4225	3469800	2
Q14974	KPNB1	Importin subunit beta-1 OS=Homo sapiens OX=9606 GN=KPNB1 PE=1 SV=2	5	16	16	16	23.6	23.6	23.6	97.169	876	0	52.433	71783000	18
P04264	KRT1	Keratin, type II cytoskeletal 1 OS=Homo sapiens OX=9606 GN=KRT1 PE=1 SV=6	2	28	28	18	45.8	45.8	35.4	66.038	644	0	131.1	229370000	41
P13645	KRT10	Keratin, type I cytoskeletal 10 OS=Homo sapiens OX=9606 GN=KRT10 PE=1 SV=6	48	27	27	23	40.1	40.1	35.8	58.826	584	0	111.9	141250000	32
P02533	KRT14	Keratin, type I cytoskeletal 14 OS=Homo sapiens OX=9606 GN=KRT14 PE=1 SV=4	19	8	4	3	14.4	9.1	7.2	51.561	472	0	8.8665	5712900	4
P35908	KRT2	Keratin, type II cytoskeletal 2 epidermal OS=Homo sapiens OX=9606 GN=KRT2 PE=1 SV=2	16	26	24	17	41.3	38.2	28.3	65.432	639	0	59.22	123910000	28
P13647	KRT5	Keratin, type II cytoskeletal 5 OS=Homo sapiens OX=9606 GN=KRT5 PE=1 SV=3	6	8	4	3	15.4	8.8	6.4	62.378	590	0	7.0739	6255100	4
P35527	KRT9	Keratin, type I cytoskeletal 9 OS=Homo sapiens OX=9606 GN=KRT9 PE=1 SV=3	3	11	11	11	21.5	21.5	21.5	62.064	623	0	40.228	42798000	11
P32004	L1CAM	Neural cell adhesion molecule L1 OS=Homo sapiens OX=9606 GN=L1CAM PE=1 SV=2	5	5	5	5	5	5	5	140	1257	0	6.1818	5111400	4
C9J9W2	LASP1	LIM and SH3 domain protein 1 (Fragment) OS=Homo sapiens OX=9606 GN=LASP1 PE=1 SV=1	2	2	2	2	15.1	15.1	15.1	18.98	166	0	5.7232	5800900	4
P00338	LDHA	L-lactate dehydrogenase A chain OS=Homo sapiens OX=9606 GN=LDHA PE=1 SV=2	17	38	38	34	93.7	93.7	85.5	36.688	332	0	305.55	1002700000	41
P07195	LDHB	L-lactate dehydrogenase B chain OS=Homo sapiens OX=9606 GN=LDHB PE=1 SV=2	5	26	23	23	63.8	59.9	59.9	36.638	334	0	139.32	752070000	41
P09382	LGALS1	Galectin-1 OS=Homo sapiens OX=9606 GN=LGALS1 PE=1 SV=2	2	6	6	6	55.6	55.6	55.6	14.716	135	0	30.824	5127200	2
P17931	LGALS3	Galectin-3 OS=Homo sapiens OX=9606 GN=LGALS3 PE=1 SV=5	2	5	5	5	23.2	23.2	23.2	26.152	250	0	13.397	23739000	7
F8VS07	LIMA1	LIM domain and actin-binding protein 1 OS=Homo sapiens OX=9606 GN=LIMA1 PE=1 SV=1	3	2	2	2	5.7	5.7	5.7	51.09	456	0.0039293	1.3156	1356300	2
Q12907	LMAN2	Vesicular integral-membrane protein VIP36 OS=Homo sapiens OX=9606 GN=LMAN2 PE=1 SV=1	4	3	3	3	9	9	9	40.228	356	0	2.9288	6556400	3
A0A0G2JRI7	LPCAT1	Lysophosphatidylcholine acyltransferase 1 OS=Homo sapiens OX=9606 GN=LPCAT1 PE=1 SV=1	3	4	4	4	19.7	19.7	19.7	25.74	234	0	10.105	12460000	4
Q07954	LRP1	Prolow-density lipoprotein receptor-related protein 1 OS=Homo sapiens OX=9606 GN=LRP1 PE=1 SV=2	2	3	3	3	0.9	0.9	0.9	504.6	4544	0	2.6137	2037300	2
P30533	LRPAP1	Alpha-2-macroglobulin receptor-associated protein OS=Homo sapiens OX=9606 GN=LRPAP1 PE=1 SV=1	2	5	5	5	17.6	17.6	17.6	41.465	357	0	9.7026	8320800	6
Q96AG4	LRRC59	Leucine-rich repeat-containing protein 59 OS=Homo sapiens OX=9606 GN=LRRC59 PE=1 SV=1	1	2	2	2	8.1	8.1	8.1	34.93	307	0	9.1782	4110500	2
P48449	LSS	Lanosterol synthase OS=Homo sapiens OX=9606 GN=LSS PE=1 SV=1	3	5	5	5	9	9	9	83.308	732	0	7.4253	9582100	6
P09960	LTA4H	Leukotriene A-4 hydrolase OS=Homo sapiens OX=9606 GN=LTA4H PE=1 SV=2	2	12	12	12	25.4	25.4	25.4	69.284	611	0	26.655	29154000	16
Q5H909	MAGED2	Melanoma-associated antigen D2 OS=Homo sapiens OX=9606 GN=MAGED2 PE=1 SV=2	3	2	2	2	2.4	2.4	2.4	63.138	588	0.0065913	1.1139	921810	1
P55145	MANF	Mesencephalic astrocyte-derived neurotrophic factor OS=Homo sapiens OX=9606 GN=MANF PE=1 SV=3	3	5	5	5	40.1	40.1	40.1	20.7	182	0	8.6408	22730000	7
P36507	MAP2K2	Dual specificity mitogen-activated protein kinase kinase 2 OS=Homo sapiens OX=9606 GN=MAP2K2 PE=1 SV=1	3	7	7	4	15.8	15.8	10.5	44.424	400	0	9.7354	13407000	5
P27816	MAP4	Microtubule-associated protein 4 OS=Homo sapiens OX=9606 GN=MAP4 PE=1 SV=3	7	9	9	9	10.7	10.7	10.7	121	1152	0	20.608	23646000	11
Q15691	MAPRE1	Microtubule-associated protein RP/EB family member 1 OS=Homo sapiens OX=9606 GN=MAPRE1 PE=1 SV=3	1	6	6	6	25.7	25.7	25.7	29.999	268	0	13.124	13506000	10
P29966	MARCKS	Myristoylated alanine-rich C-kinase substrate OS=Homo sapiens OX=9606 GN=MARCKS PE=1 SV=4	1	2	2	2	9.3	9.3	9.3	31.554	332	0.0048077	1.2111	2991900	2
P31153	MAT2A	S-adenosylmethionine synthase isoform type-2 OS=Homo sapiens OX=9606 GN=MAT2A PE=1 SV=1	2	7	7	7	20.8	20.8	20.8	43.66	395	0	15.733	22609000	12
Q9NZL9	MAT2B	Methionine adenosyltransferase 2 subunit beta OS=Homo sapiens OX=9606 GN=MAT2B PE=1 SV=1	3	2	2	2	7.5	7.5	7.5	37.551	334	0	5.7325	1819900	2
P43121	MCAM	Cell surface glycoprotein MUC18 OS=Homo sapiens OX=9606 GN=MCAM PE=1 SV=2	1	6	6	6	13.3	13.3	13.3	71.607	646	0	13.163	18923000	7
P49736	MCM2	DNA replication licensing factor MCM2 OS=Homo sapiens OX=9606 GN=MCM2 PE=1 SV=4	2	2	2	2	3.1	3.1	3.1	101.89	904	0.0010799	1.7665	707280	1
P40925	MDH1	Malate dehydrogenase, cytoplasmic OS=Homo sapiens OX=9606 GN=MDH1 PE=1 SV=4	6	15	15	15	46.7	46.7	46.7	36.426	334	0	49.811	103160000	16
P40926	MDH2	Malate dehydrogenase, mitochondrial OS=Homo sapiens OX=9606 GN=MDH2 PE=1 SV=3	2	14	14	14	52.4	52.4	52.4	35.503	338	0	61.845	86689000	22
P48163	ME1	NADP-dependent malic enzyme OS=Homo sapiens OX=9606 GN=ME1 PE=1 SV=1	1	3	3	3	7.7	7.7	7.7	64.149	572	0	6.4583	1566900	2
Q14696	MESD	LRP chaperone MESD OS=Homo sapiens OX=9606 GN=MESD PE=1 SV=2	2	5	5	5	31.2	31.2	31.2	26.076	234	0	10.918	8695000	7
P14174	MIF	Macrophage migration inhibitory factor OS=Homo sapiens OX=9606 GN=MIF PE=1 SV=4	1	2	2	2	17.4	17.4	17.4	12.476	115	0	9.96	52743000	5
P26038	MSN	Moesin OS=Homo sapiens OX=9606 GN=MSN PE=1 SV=3	2	25	25	16	40.7	40.7	30	67.819	577	0	63.577	150180000	36
Q9Y6C9	MTCH2	Mitochondrial carrier homolog 2 OS=Homo sapiens OX=9606 GN=MTCH2 PE=1 SV=1	2	9	9	9	34.3	34.3	34.3	33.331	303	0	41.781	69184000	15
P00403	MT-CO2	Cytochrome c oxidase subunit 2 OS=Homo sapiens OX=9606 GN=MT-CO2 PE=1 SV=1	1	2	2	2	11.5	11.5	11.5	25.565	227	0	3.7318	3045800	3
A0A494C1T2	MTHFD1	C-1-tetrahydrofolate synthase, cytoplasmic (Fragment) OS=Homo sapiens OX=9606 GN=MTHFD1 PE=1 SV=1	6	2	2	2	4.3	4.3	4.3	69.704	644	0	4.6251	3444900	1
Q9H3R2	MUC13	Mucin-13 OS=Homo sapiens OX=9606 GN=MUC13 PE=1 SV=3	1	3	3	3	10	10	10	54.603	512	0	25.565	13323000	5
H3BP35	MVD	Diphosphomevalonate decarboxylase (Fragment) OS=Homo sapiens OX=9606 GN=MVD PE=1 SV=1	2	2	2	2	8.5	8.5	8.5	29.378	271	0	4.7817	7231500	2
Q969H8	MYDGF	Myeloid-derived growth factor OS=Homo sapiens OX=9606 GN=MYDGF PE=1 SV=1	3	5	5	5	26	26	26	18.795	173	0	12.457	41969000	12
Q9HB07	MYG1	UPF0160 protein MYG1, mitochondrial OS=Homo sapiens OX=9606 GN=C12orf10 PE=1 SV=2	3	2	2	2	9.6	9.6	9.6	42.449	376	0	6.654	2010300	2
F8W1R7	MYL6	Myosin light polypeptide 6 OS=Homo sapiens OX=9606 GN=MYL6 PE=1 SV=1	14	5	5	5	39.3	39.3	39.3	16.29	145	0	10.888	27606000	6
A0A0B4J1W3	NAA15	N-alpha-acetyltransferase 15, NatA auxiliary subunit OS=Homo sapiens OX=9606 GN=NAA15 PE=1 SV=1	3	4	4	4	5.1	5.1	5.1	101.2	865	0	8.7047	3388100	4
A0A087WWJ2	NAA50	N-alpha-acetyltransferase 50 OS=Homo sapiens OX=9606 GN=NAA50 PE=1 SV=1	9	2	2	2	29.6	29.6	29.6	9.4367	81	0	3.9943	3649400	2
F8VZJ2	NACA	Nascent polypeptide-associated complex subunit alpha OS=Homo sapiens OX=9606 GN=NACA PE=1 SV=1	9	3	3	3	33.8	33.8	33.8	15.016	136	0	32.216	17332000	4
Q13564	NAE1	NEDD8-activating enzyme E1 regulatory subunit OS=Homo sapiens OX=9606 GN=NAE1 PE=1 SV=1	6	7	7	7	15.4	15.4	15.4	60.246	534	0	13.893	12180000	10
H0YHC3	NAP1L1	Nucleosome assembly protein 1-like 1 (Fragment) OS=Homo sapiens OX=9606 GN=NAP1L1 PE=1 SV=1	16	6	4	4	29.3	24.2	24.2	23.417	198	0	17.419	32098000	3
Q99733	NAP1L4	Nucleosome assembly protein 1-like 4 OS=Homo sapiens OX=9606 GN=NAP1L4 PE=1 SV=1	13	8	8	6	26.9	26.9	24	42.823	375	0	29.188	42837000	11
Q6XQN6	NAPRT	Nicotinate phosphoribosyltransferase OS=Homo sapiens OX=9606 GN=NAPRT PE=1 SV=2	6	12	12	12	23.6	23.6	23.6	57.578	538	0	30.566	20916000	14
O43776	NARS1	Asparagine--tRNA ligase, cytoplasmic OS=Homo sapiens OX=9606 GN=NARS PE=1 SV=1	5	3	3	3	6.6	6.6	6.6	62.942	548	0	5.2477	4299300	3
P49321	NASP	Nuclear autoantigenic sperm protein OS=Homo sapiens OX=9606 GN=NASP PE=1 SV=2	8	15	15	15	20.9	20.9	20.9	85.237	788	0	54.534	54526000	16
Q8NCW5	NAXE	NAD(P)H-hydrate epimerase OS=Homo sapiens OX=9606 GN=NAXE PE=1 SV=2	3	8	8	8	40.6	40.6	40.6	31.674	288	0	35.15	17298000	9
Q6PIU2	NCEH1	Neutral cholesterol ester hydrolase 1 OS=Homo sapiens OX=9606 GN=NCEH1 PE=1 SV=3	4	5	5	5	15	15	15	45.807	408	0	9.4484	15360000	7
P19338	NCL	Nucleolin OS=Homo sapiens OX=9606 GN=NCL PE=1 SV=3	2	8	8	8	17	17	17	76.613	710	0	28.052	23203000	9
K7ELZ9	NCLN	Nicalin (Fragment) OS=Homo sapiens OX=9606 GN=NCLN PE=1 SV=1	6	2	2	2	12.4	12.4	12.4	32.457	282	0	7.2745	2316500	2
Q92597	NDRG1	Protein NDRG1 OS=Homo sapiens OX=9606 GN=NDRG1 PE=1 SV=1	10	5	5	5	22.1	22.1	22.1	42.835	394	0	17.613	7667100	8
Q9UMX5	NENF	Neudesin OS=Homo sapiens OX=9606 GN=NENF PE=1 SV=1	1	2	2	2	14	14	14	18.856	172	0	2.6382	1943500	1
Q96TA1	NIBAN2	Niban-like protein 1 OS=Homo sapiens OX=9606 GN=FAM129B PE=1 SV=3	1	9	9	9	16	16	16	84.137	746	0	28.678	24253000	9
Q9GZT8	NIF3L1	NIF3-like protein 1 OS=Homo sapiens OX=9606 GN=NIF3L1 PE=1 SV=2	6	9	9	9	29.4	29.4	29.4	41.968	377	0	17.229	39299000	13
Q9BYT8	NLN	Neurolysin, mitochondrial OS=Homo sapiens OX=9606 GN=NLN PE=1 SV=1	4	4	4	4	6.4	6.4	6.4	80.651	704	0	5.3101	8988800	4
Q32Q12	NME1-NME2	Nucleoside diphosphate kinase OS=Homo sapiens OX=9606 GN=NME1-NME2 PE=1 SV=1	8	13	13	5	59.6	59.6	18.2	32.642	292	0	39.469	182820000	29
P30419	NMT1	Glycylpeptide N-tetradecanoyltransferase 1 OS=Homo sapiens OX=9606 GN=NMT1 PE=1 SV=2	2	2	2	2	6	6	6	56.806	496	0.0010917	1.8021	1037800	1
E9PLK3	NPEPPS	Aminopeptidase OS=Homo sapiens OX=9606 GN=NPEPPS PE=1 SV=1	9	17	17	17	20	20	20	102.99	915	0	45.68	74481000	23
P06748	NPM1	Nucleophosmin OS=Homo sapiens OX=9606 GN=NPM1 PE=1 SV=2	3	6	6	6	22.8	22.8	22.8	32.575	294	0	13.943	18036000	6
B4DLR8	NQO1	NAD(P)H dehydrogenase [quinone] 1 OS=Homo sapiens OX=9606 GN=NQO1 PE=1 SV=1	4	7	7	7	33.7	33.7	33.7	22.793	202	0	11.186	19531000	12
Q5TD07	NQO2	Ribosyldihydronicotinamide dehydrogenase [quinone] OS=Homo sapiens OX=9606 GN=NQO2 PE=1 SV=1	3	3	3	3	29.5	29.5	29.5	21.537	193	0	13.749	11728000	3
P01111	NRAS	GTPase NRas OS=Homo sapiens OX=9606 GN=NRAS PE=1 SV=1	3	3	3	3	18.5	18.5	18.5	21.229	189	0	5.6346	3423700	2
G3V1R5	NRDC	Nardilysin OS=Homo sapiens OX=9606 GN=NRDC PE=1 SV=1	5	4	4	4	3.4	3.4	3.4	125.12	1087	0	4.4412	2366000	4
C9JDR0	NSDHL	Sterol-4-alpha-carboxylate 3-dehydrogenase, decarboxylating (Fragment) OS=Homo sapiens OX=9606 GN=NSDHL PE=1 SV=1	2	2	2	2	9.4	9.4	9.4	28.146	254	0	5.0001	4156300	2
Q9UNZ2	NSFL1C	NSFL1 cofactor p47 OS=Homo sapiens OX=9606 GN=NSFL1C PE=1 SV=2	3	7	7	7	27	27	27	40.572	370	0	14.693	19041000	9
Q08J23	NSUN2	tRNA (cytosine(34)-C(5))-methyltransferase OS=Homo sapiens OX=9606 GN=NSUN2 PE=1 SV=2	2	10	10	10	14.9	14.9	14.9	86.47	767	0	17.556	14126000	12
P49902	NT5C2	Cytosolic purine 5'-nucleotidase OS=Homo sapiens OX=9606 GN=NT5C2 PE=1 SV=1	8	3	3	3	6.2	6.2	6.2	64.969	561	0	3.0907	1945600	3
Q02818	NUCB1	Nucleobindin-1 OS=Homo sapiens OX=9606 GN=NUCB1 PE=1 SV=4	3	8	8	8	19.5	19.5	19.5	53.879	461	0	10.61	8600100	5
A0A0A0MSU9	NUDC	Nuclear migration protein nudC (Fragment) OS=Homo sapiens OX=9606 GN=NUDC PE=1 SV=1	3	3	3	3	24.7	24.7	24.7	21.244	186	0	7.8476	21213000	4
P36639	NUDT1	7,8-dihydro-8-oxoguanine triphosphatase OS=Homo sapiens OX=9606 GN=NUDT1 PE=1 SV=3	1	3	3	3	20.8	20.8	20.8	22.519	197	0	19.587	8977500	2
Q9UKK9	NUDT5	ADP-sugar pyrophosphatase OS=Homo sapiens OX=9606 GN=NUDT5 PE=1 SV=1	6	7	7	7	28.8	28.8	28.8	24.327	219	0	25.448	21721000	9
A0A087X028	OGFR	Opioid growth factor receptor OS=Homo sapiens OX=9606 GN=OGFR PE=1 SV=1	3	2	2	2	6.7	6.7	6.7	44.756	390	0	4.2054	2323300	3
Q9NPF4	OSGEP	Probable tRNA N6-adenosine threonylcarbamoyltransferase OS=Homo sapiens OX=9606 GN=OSGEP PE=1 SV=1	2	2	2	2	9.9	9.9	9.9	36.426	335	0	5.4081	2138200	2
C9JIG9	OXSR1	Serine/threonine-protein kinase OSR1 OS=Homo sapiens OX=9606 GN=OXSR1 PE=1 SV=1	2	2	2	2	4.5	4.5	4.5	51.856	468	0.0020725	1.5588	1618100	2
Q32P28	P3H1	Prolyl 3-hydroxylase 1 OS=Homo sapiens OX=9606 GN=P3H1 PE=1 SV=2	3	5	5	5	7.2	7.2	7.2	83.393	736	0	8.0238	6818100	6
P13674	P4HA1	Prolyl 4-hydroxylase subunit alpha-1 OS=Homo sapiens OX=9606 GN=P4HA1 PE=1 SV=2	1	8	8	8	19.3	19.3	19.3	61.049	534	0	20.206	25435000	9
O15460	P4HA2	Prolyl 4-hydroxylase subunit alpha-2 OS=Homo sapiens OX=9606 GN=P4HA2 PE=1 SV=1	9	7	7	7	16.8	16.8	16.8	60.901	535	0	15.324	9831100	8
P07237	P4HB	Protein disulfide-isomerase OS=Homo sapiens OX=9606 GN=P4HB PE=1 SV=3	12	40	40	40	67.3	67.3	67.3	57.116	508	0	205.49	571230000	75
Q9UQ80	PA2G4	Proliferation-associated protein 2G4 OS=Homo sapiens OX=9606 GN=PA2G4 PE=1 SV=3	5	13	13	13	36.8	36.8	36.8	43.786	394	0	30.945	29424000	19
A0A087WTT1	PABPC1	Polyadenylate-binding protein OS=Homo sapiens OX=9606 GN=PABPC1 PE=1 SV=1	25	15	15	10	35.6	35.6	22.4	58.535	522	0	55.646	43725000	15
E9PJ75	PACSIN3	Protein kinase C and casein kinase substrate in neurons protein 3 (Fragment) OS=Homo sapiens OX=9606 GN=PACSIN3 PE=1 SV=1	5	2	2	2	14.8	14.8	14.8	16.175	142	0	2.6923	1263900	1
M0R389	PAFAH1B3	Platelet-activating factor acetylhydrolase IB subunit gamma (Fragment) OS=Homo sapiens OX=9606 GN=PAFAH1B3 PE=1 SV=8	2	2	2	2	11	11	11	18.356	164	0	2.5977	2568500	2
E9PBS1	PAICS	Multifunctional protein ADE2 (Fragment) OS=Homo sapiens OX=9606 GN=PAICS PE=1 SV=1	3	4	4	4	12.6	12.6	12.6	45.651	413	0	7.5472	7884400	3
D6REB4	PAIP1	Polyadenylate-binding protein-interacting protein 1 OS=Homo sapiens OX=9606 GN=PAIP1 PE=1 SV=1	2	2	2	2	6.6	6.6	6.6	39.908	351	0	3.3876	2741200	2
Q13177	PAK2	Serine/threonine-protein kinase PAK 2 OS=Homo sapiens OX=9606 GN=PAK2 PE=1 SV=3	9	10	10	10	31.3	31.3	31.3	58.042	524	0	22.773	20604000	12
K7ELW0	PARK7	Protein/nucleic acid deglycase DJ-1 OS=Homo sapiens OX=9606 GN=PARK7 PE=1 SV=1	3	7	7	7	48.5	48.5	48.5	17.91	169	0	33.242	43000000	15
P09874	PARP1	Poly [ADP-ribose] polymerase 1 OS=Homo sapiens OX=9606 GN=PARP1 PE=1 SV=4	1	3	3	3	4.2	4.2	4.2	113.08	1014	0	2.8614	3763000	3
E5RFX4	PBK	Lymphokine-activated killer T-cell-originated protein kinase (Fragment) OS=Homo sapiens OX=9606 GN=PBK PE=1 SV=2	2	2	2	2	11.9	11.9	11.9	17.075	151	0.0010537	1.653	4295700	1
Q15365	PCBP1	Poly(rC)-binding protein 1 OS=Homo sapiens OX=9606 GN=PCBP1 PE=1 SV=2	1	4	4	4	15.2	15.2	15.2	37.497	356	0	6.416	16657000	4
Q15366	PCBP2	Poly(rC)-binding protein 2 OS=Homo sapiens OX=9606 GN=PCBP2 PE=1 SV=1	11	2	2	2	10.1	10.1	10.1	38.58	365	0	6.3289	8734200	4
F8WDT3	PCMT1	Protein-L-isoaspartate(D-aspartate) O-methyltransferase OS=Homo sapiens OX=9606 GN=PCMT1 PE=1 SV=2	9	2	2	2	24.2	24.2	24.2	6.9728	62	0	2.8746	2781400	1
P12004	PCNA	Proliferating cell nuclear antigen OS=Homo sapiens OX=9606 GN=PCNA PE=1 SV=1	1	14	14	14	46.7	46.7	46.7	28.768	261	0	35.245	123360000	20
F8W8W4	PCYOX1	Prenylcysteine oxidase 1 OS=Homo sapiens OX=9606 GN=PCYOX1 PE=1 SV=1	5	4	4	4	19.5	19.5	19.5	32.258	293	0	6.999	9531900	3
Q13442	PDAP1	28 kDa heat- and acid-stable phosphoprotein OS=Homo sapiens OX=9606 GN=PDAP1 PE=1 SV=1	1	2	2	2	13.3	13.3	13.3	20.63	181	0	2.7002	2262800	1
O75340	PDCD6	Programmed cell death protein 6 OS=Homo sapiens OX=9606 GN=PDCD6 PE=1 SV=1	4	3	3	3	9.4	9.4	9.4	21.868	191	0	3.6741	3415200	4
Q8WUM4	PDCD6IP	Programmed cell death 6-interacting protein OS=Homo sapiens OX=9606 GN=PDCD6IP PE=1 SV=1	5	6	6	6	7.6	7.6	7.6	96.022	868	0	11.755	3562300	5
P30101	PDIA3	Protein disulfide-isomerase A3 OS=Homo sapiens OX=9606 GN=PDIA3 PE=1 SV=4	1	32	32	26	54.5	54.5	45.3	56.782	505	0	161.71	737810000	61
P13667	PDIA4	Protein disulfide-isomerase A4 OS=Homo sapiens OX=9606 GN=PDIA4 PE=1 SV=2	2	31	31	31	46.5	46.5	46.5	72.932	645	0	106.54	313420000	54
Q14554	PDIA5	Protein disulfide-isomerase A5 OS=Homo sapiens OX=9606 GN=PDIA5 PE=1 SV=1	1	2	2	2	3.7	3.7	3.7	59.594	519	0	2.2467	25806000	2
Q15084	PDIA6	Protein disulfide-isomerase A6 OS=Homo sapiens OX=9606 GN=PDIA6 PE=1 SV=1	1	19	19	19	48.2	48.2	48.2	48.121	440	0	91.171	319120000	26
O00764	PDXK	Pyridoxal kinase OS=Homo sapiens OX=9606 GN=PDXK PE=1 SV=1	3	5	5	5	20.5	20.5	20.5	35.102	312	0	12.702	10903000	6
P30086	PEBP1	Phosphatidylethanolamine-binding protein 1 OS=Homo sapiens OX=9606 GN=PEBP1 PE=1 SV=3	1	10	10	10	76.5	76.5	76.5	21.057	187	0	36.278	64626000	11
O15067	PFAS	Phosphoribosylformylglycinamidine synthase OS=Homo sapiens OX=9606 GN=PFAS PE=1 SV=4	6	29	29	29	26.7	26.7	26.7	144.73	1338	0	120.47	149240000	45
H3BMQ1	PFDN5	Prefoldin subunit 5 OS=Homo sapiens OX=9606 GN=PFDN5 PE=1 SV=1	3	2	2	2	26.2	26.2	26.2	9.5351	84	0	2.2488	3499400	2
Q01813	PFKP	ATP-dependent 6-phosphofructokinase, platelet type OS=Homo sapiens OX=9606 GN=PFKP PE=1 SV=2	2	2	2	2	2.8	2.8	2.8	85.595	784	0.0010593	1.678	1746300	2
P07737	PFN1	Profilin-1 OS=Homo sapiens OX=9606 GN=PFN1 PE=1 SV=2	4	14	14	14	75.7	75.7	75.7	15.054	140	0	58.697	282150000	24
C9J0J7	PFN2	Profilin OS=Homo sapiens OX=9606 GN=PFN2 PE=1 SV=1	2	5	5	2	45.1	45.1	11	9.8402	91	0	21.074	11360000	7
P18669	PGAM1	Phosphoglycerate mutase 1 OS=Homo sapiens OX=9606 GN=PGAM1 PE=1 SV=2	3	15	15	15	57.1	57.1	57.1	28.804	254	0	100.5	205980000	18
P52209	PGD	6-phosphogluconate dehydrogenase, decarboxylating OS=Homo sapiens OX=9606 GN=PGD PE=1 SV=3	5	5	5	5	13.9	13.9	13.9	53.139	483	0	9.2325	10332000	4
P00558	PGK1	Phosphoglycerate kinase 1 OS=Homo sapiens OX=9606 GN=PGK1 PE=1 SV=3	2	28	28	28	76	76	76	44.614	417	0	137.86	524360000	48
O95336	PGLS	6-phosphogluconolactonase OS=Homo sapiens OX=9606 GN=PGLS PE=1 SV=2	4	8	8	8	41.5	41.5	41.5	27.547	258	0	17.459	29021000	14
P36871	PGM1	Phosphoglucomutase-1 OS=Homo sapiens OX=9606 GN=PGM1 PE=1 SV=3	2	14	14	14	30.4	30.4	30.4	61.448	562	0	29.62	36090000	16
Q96G03	PGM2	Phosphoglucomutase-2 OS=Homo sapiens OX=9606 GN=PGM2 PE=1 SV=4	4	9	9	8	20.1	20.1	19.1	68.283	612	0	16.977	28294000	9
A6NDG6	PGP	Glycerol-3-phosphate phosphatase OS=Homo sapiens OX=9606 GN=PGP PE=1 SV=1	2	6	6	6	25.5	25.5	25.5	34.006	321	0	12.695	16625000	7
O00264	PGRMC1	Membrane-associated progesterone receptor component 1 OS=Homo sapiens OX=9606 GN=PGRMC1 PE=1 SV=3	1	4	4	4	12.8	12.8	12.8	21.671	195	0	8.4423	13621000	8
O15173	PGRMC2	Membrane-associated progesterone receptor component 2 OS=Homo sapiens OX=9606 GN=PGRMC2 PE=1 SV=1	1	2	2	2	12.1	12.1	12.1	23.818	223	0	4.9527	4031500	2
A0A286YF22	PHGDH	D-3-phosphoglycerate dehydrogenase OS=Homo sapiens OX=9606 GN=PHGDH PE=1 SV=1	14	9	9	9	21.7	21.7	21.7	55.938	526	0	28.664	17851000	10
I3L4H1	PITPNA	Phosphatidylinositol transfer protein alpha isoform (Fragment) OS=Homo sapiens OX=9606 GN=PITPNA PE=1 SV=1	7	4	4	3	15.3	15.3	11.5	24.64	209	0	4.8043	5925500	4
A0A0A0MSW4	PITPNB	Phosphatidylinositol transfer protein beta isoform OS=Homo sapiens OX=9606 GN=PITPNB PE=1 SV=1	4	4	3	3	21	18.1	18.1	31.581	271	0	5.4045	5052100	3
P14618	PKM	Pyruvate kinase PKM OS=Homo sapiens OX=9606 GN=PKM PE=1 SV=4	10	18	18	18	46.3	46.3	46.3	57.936	531	0	76.264	172840000	25
P47712	PLA2G4A	Cytosolic phospholipase A2 OS=Homo sapiens OX=9606 GN=PLA2G4A PE=1 SV=2	1	2	2	2	3.2	3.2	3.2	85.238	749	0	2.6365	1885100	1
O60664	PLIN3	Perilipin-3 OS=Homo sapiens OX=9606 GN=PLIN3 PE=1 SV=3	4	13	13	13	46.8	46.8	46.8	47.074	434	0	64.639	49073000	16
Q02809	PLOD1	Procollagen-lysine,2-oxoglutarate 5-dioxygenase 1 OS=Homo sapiens OX=9606 GN=PLOD1 PE=1 SV=2	2	4	4	4	6.2	6.2	6.2	83.549	727	0	5.6349	6857600	4
E7ETU9	PLOD2	Procollagen-lysine,2-oxoglutarate 5-dioxygenase 2 OS=Homo sapiens OX=9606 GN=PLOD2 PE=1 SV=1	3	5	5	5	9.7	9.7	9.7	81.169	703	0	8.7666	623850000	9
O60568	PLOD3	Multifunctional procollagen lysine hydroxylase and glycosyltransferase LH3 OS=Homo sapiens OX=9606 GN=PLOD3 PE=1 SV=1	3	7	7	7	12.9	12.9	12.9	84.784	738	0	9.3928	12559000	7
P13797	PLS3	Plastin-3 OS=Homo sapiens OX=9606 GN=PLS3 PE=1 SV=4	9	17	17	17	34.4	34.4	34.4	70.81	630	0	48.907	124060000	27
P00491	PNP	Purine nucleoside phosphorylase OS=Homo sapiens OX=9606 GN=PNP PE=1 SV=2	4	9	9	9	41.2	41.2	41.2	32.118	289	0	18.369	37386000	13
J3QQV6	PNPO	Pyridoxine-5'-phosphate oxidase (Fragment) OS=Homo sapiens OX=9606 GN=PNPO PE=1 SV=2	4	3	3	3	27.9	27.9	27.9	19.085	165	0	7.3078	3874100	3
O00592	PODXL	Podocalyxin OS=Homo sapiens OX=9606 GN=PODXL PE=1 SV=2	1	2	2	2	2.9	2.9	2.9	58.635	558	0	2.5008	6585400	3
Q9H488	POFUT1	GDP-fucose protein O-fucosyltransferase 1 OS=Homo sapiens OX=9606 GN=POFUT1 PE=1 SV=1	1	10	10	10	34	34	34	43.955	388	0	28.174	36800000	13
C9JLU1	POLR2H	DNA-directed RNA polymerases I, II, and III subunit RPABC3 (Fragment) OS=Homo sapiens OX=9606 GN=POLR2H PE=1 SV=8	2	2	2	2	23.6	23.6	23.6	16.925	148	0	3.6234	1154900	2
A0A0J9YXF2	PON2	Paraoxonase 2, isoform CRA_a OS=Homo sapiens OX=9606 GN=PON2 PE=1 SV=1	7	4	4	4	13.6	13.6	13.6	41.527	375	0	14.796	12071000	8
P16435	POR	NADPH--cytochrome P450 reductase OS=Homo sapiens OX=9606 GN=POR PE=1 SV=2	3	4	4	4	5.9	5.9	5.9	76.689	677	0	5.8503	4358700	3
Q15181	PPA1	Inorganic pyrophosphatase OS=Homo sapiens OX=9606 GN=PPA1 PE=1 SV=2	2	18	18	18	57.4	57.4	57.4	32.66	289	0	56.468	118080000	27
Q06203	PPAT	Amidophosphoribosyltransferase OS=Homo sapiens OX=9606 GN=PPAT PE=1 SV=1	3	6	6	6	15.5	15.5	15.5	57.398	517	0	11.762	5796400	5
P62937	PPIA	Peptidyl-prolyl cis-trans isomerase A OS=Homo sapiens OX=9606 GN=PPIA PE=1 SV=2	12	12	12	12	81.8	81.8	81.8	18.012	165	0	37.837	310200000	26
P23284	PPIB	Peptidyl-prolyl cis-trans isomerase B OS=Homo sapiens OX=9606 GN=PPIB PE=1 SV=2	1	21	21	21	67.6	67.6	67.6	23.742	216	0	85.589	273340000	47
P45877	PPIC	Peptidyl-prolyl cis-trans isomerase C OS=Homo sapiens OX=9606 GN=PPIC PE=1 SV=1	1	2	2	2	9.9	9.9	9.9	22.763	212	0	3.205	2353900	2
O15355	PPM1G	Protein phosphatase 1G OS=Homo sapiens OX=9606 GN=PPM1G PE=1 SV=1	1	4	4	4	9.2	9.2	9.2	59.271	546	0	5.2763	5883100	4
Q9Y570	PPME1	Protein phosphatase methylesterase 1 OS=Homo sapiens OX=9606 GN=PPME1 PE=1 SV=3	1	2	2	2	8.3	8.3	8.3	42.315	386	0	2.3633	1676800	2
P67775	PPP2CA	Serine/threonine-protein phosphatase 2A catalytic subunit alpha isoform OS=Homo sapiens OX=9606 GN=PPP2CA PE=1 SV=1	11	4	4	4	16.2	16.2	16.2	35.594	309	0	12.079	5191600	4
P30153	PPP2R1A	Serine/threonine-protein phosphatase 2A 65 kDa regulatory subunit A alpha isoform OS=Homo sapiens OX=9606 GN=PPP2R1A PE=1 SV=4	7	12	12	11	26.1	26.1	24.1	65.308	589	0	26.046	64510000	14
P30154	PPP2R1B	Serine/threonine-protein phosphatase 2A 65 kDa regulatory subunit A beta isoform OS=Homo sapiens OX=9606 GN=PPP2R1B PE=1 SV=3	2	3	2	2	7.5	5.5	5.5	66.213	601	0	3.2331	1589900	2
P63151	PPP2R2A	Serine/threonine-protein phosphatase 2A 55 kDa regulatory subunit B alpha isoform OS=Homo sapiens OX=9606 GN=PPP2R2A PE=1 SV=1	5	7	7	7	19.9	19.9	19.9	51.691	447	0	16.769	9737000	6
H0YDU8	PPP5C	Serine/threonine-protein phosphatase (Fragment) OS=Homo sapiens OX=9606 GN=PPP5C PE=1 SV=1	3	2	2	2	5.2	5.2	5.2	55.096	485	0	2.3272	2013500	2
Q06830	PRDX1	Peroxiredoxin-1 OS=Homo sapiens OX=9606 GN=PRDX1 PE=1 SV=1	3	21	21	19	73.4	73.4	61.8	22.11	199	0	70.158	250940000	31
P32119	PRDX2	Peroxiredoxin-2 OS=Homo sapiens OX=9606 GN=PRDX2 PE=1 SV=5	2	4	3	3	25.8	20.2	20.2	21.892	198	0	2.8918	5671400	3
Q13162	PRDX4	Peroxiredoxin-4 OS=Homo sapiens OX=9606 GN=PRDX4 PE=1 SV=1	4	9	8	8	48.7	44.3	44.3	30.54	271	0	21.526	33044000	11
P30044	PRDX5	Peroxiredoxin-5, mitochondrial OS=Homo sapiens OX=9606 GN=PRDX5 PE=1 SV=4	1	5	5	5	33.2	33.2	33.2	22.086	214	0	12.391	26625000	6
P30041	PRDX6	Peroxiredoxin-6 OS=Homo sapiens OX=9606 GN=PRDX6 PE=1 SV=3	1	18	18	18	74.6	74.6	74.6	25.035	224	0	86.247	255700000	36
P14314	PRKCSH	Glucosidase 2 subunit beta OS=Homo sapiens OX=9606 GN=PRKCSH PE=1 SV=2	6	15	15	15	26.3	26.3	26.3	59.425	528	0	45.778	169750000	21
Q9Y617	PSAT1	Phosphoserine aminotransferase OS=Homo sapiens OX=9606 GN=PSAT1 PE=1 SV=2	1	18	18	18	45.4	45.4	45.4	40.422	370	0	46.038	99009000	24
P25786	PSMA1	Proteasome subunit alpha type-1 OS=Homo sapiens OX=9606 GN=PSMA1 PE=1 SV=1	3	12	12	12	33.8	33.8	33.8	29.555	263	0	32.683	71528000	23
A0A024RA52	PSMA2	Proteasome subunit alpha type OS=Homo sapiens OX=9606 GN=PSMA2 PE=1 SV=1	3	7	7	7	35.9	35.9	35.9	25.898	234	0	15.603	31291000	8
P25788	PSMA3	Proteasome subunit alpha type-3 OS=Homo sapiens OX=9606 GN=PSMA3 PE=1 SV=2	5	9	9	9	35.7	35.7	35.7	28.433	255	0	18.806	50633000	11
P25789	PSMA4	Proteasome subunit alpha type-4 OS=Homo sapiens OX=9606 GN=PSMA4 PE=1 SV=1	10	6	6	6	21.8	21.8	21.8	29.483	261	0	11.568	29188000	7
P28066	PSMA5	Proteasome subunit alpha type-5 OS=Homo sapiens OX=9606 GN=PSMA5 PE=1 SV=3	1	6	6	6	22.8	22.8	22.8	26.411	241	0	27.863	32152000	8
P60900	PSMA6	Proteasome subunit alpha type-6 OS=Homo sapiens OX=9606 GN=PSMA6 PE=1 SV=1	8	9	9	9	48	48	48	27.399	246	0	28.964	119740000	16
O14818	PSMA7	Proteasome subunit alpha type-7 OS=Homo sapiens OX=9606 GN=PSMA7 PE=1 SV=1	5	10	10	10	42.7	42.7	42.7	27.887	248	0	27.66	59953000	14
P20618	PSMB1	Proteasome subunit beta type-1 OS=Homo sapiens OX=9606 GN=PSMB1 PE=1 SV=2	1	10	10	10	47.7	47.7	47.7	26.489	241	0	45.449	43969000	15
P49721	PSMB2	Proteasome subunit beta type-2 OS=Homo sapiens OX=9606 GN=PSMB2 PE=1 SV=1	2	8	8	8	41.3	41.3	41.3	22.836	201	0	15.392	25627000	7
A0A087WUL2	PSMB3	Proteasome subunit beta type-3 (Fragment) OS=Homo sapiens OX=9606 GN=PSMB3 PE=1 SV=1	4	8	8	8	50.3	50.3	50.3	16.161	145	0	23.9	45412000	12
P28070	PSMB4	Proteasome subunit beta type-4 OS=Homo sapiens OX=9606 GN=PSMB4 PE=1 SV=4	1	5	5	5	17.8	17.8	17.8	29.204	264	0	9.4363	38984000	6
P28074	PSMB5	Proteasome subunit beta type-5 OS=Homo sapiens OX=9606 GN=PSMB5 PE=1 SV=3	2	9	9	9	24.7	24.7	24.7	28.48	263	0	22.335	35464000	9
P28072	PSMB6	Proteasome subunit beta type-6 OS=Homo sapiens OX=9606 GN=PSMB6 PE=1 SV=4	3	5	5	5	21.3	21.3	21.3	25.357	239	0	20.363	80137000	7
Q99436	PSMB7	Proteasome subunit beta type-7 OS=Homo sapiens OX=9606 GN=PSMB7 PE=1 SV=1	2	6	6	6	14.4	14.4	14.4	29.965	277	0	19.445	25370000	10
P62191	PSMC1	26S proteasome regulatory subunit 4 OS=Homo sapiens OX=9606 GN=PSMC1 PE=1 SV=1	1	7	7	7	15.2	15.2	15.2	49.184	440	0	12.291	19939000	8
P35998	PSMC2	26S proteasome regulatory subunit 7 OS=Homo sapiens OX=9606 GN=PSMC2 PE=1 SV=3	2	11	11	11	30.5	30.5	30.5	48.633	433	0	25.584	22176000	12
E9PM69	PSMC3	26S proteasome regulatory subunit 6A OS=Homo sapiens OX=9606 GN=PSMC3 PE=1 SV=1	6	4	4	4	15.4	15.4	15.4	44.323	397	0	10.019	12623000	5
P43686	PSMC4	26S proteasome regulatory subunit 6B OS=Homo sapiens OX=9606 GN=PSMC4 PE=1 SV=2	1	6	6	6	15.1	15.1	15.1	47.366	418	0	13.102	18363000	6
P62195	PSMC5	26S proteasome regulatory subunit 8 OS=Homo sapiens OX=9606 GN=PSMC5 PE=1 SV=1	10	7	7	7	23.2	23.2	23.2	45.626	406	0	16.326	14565000	9
P62333	PSMC6	26S proteasome regulatory subunit 10B OS=Homo sapiens OX=9606 GN=PSMC6 PE=1 SV=1	5	5	5	5	13.6	13.6	13.6	44.172	389	0	9.356	12366000	7
A0A087WW66	PSMD1	26S proteasome non-ATPase regulatory subunit 1 OS=Homo sapiens OX=9606 GN=PSMD1 PE=1 SV=1	5	6	6	6	8.7	8.7	8.7	105.85	953	0	7.7129	14408000	4
O00231	PSMD11	26S proteasome non-ATPase regulatory subunit 11 OS=Homo sapiens OX=9606 GN=PSMD11 PE=1 SV=3	4	7	7	7	23	23	23	47.463	422	0	11.221	22058000	10
O00232	PSMD12	26S proteasome non-ATPase regulatory subunit 12 OS=Homo sapiens OX=9606 GN=PSMD12 PE=1 SV=3	1	4	4	4	10.5	10.5	10.5	52.904	456	0	6.3987	3852200	5
J3KNQ3	PSMD13	26S proteasome non-ATPase regulatory subunit 13 OS=Homo sapiens OX=9606 GN=PSMD13 PE=1 SV=1	5	3	3	3	10.3	10.3	10.3	39.829	349	0	5.4401	5867600	3
O00487	PSMD14	26S proteasome non-ATPase regulatory subunit 14 OS=Homo sapiens OX=9606 GN=PSMD14 PE=1 SV=1	1	2	2	2	6.1	6.1	6.1	34.577	310	0	2.4263	2209700	2
Q13200	PSMD2	26S proteasome non-ATPase regulatory subunit 2 OS=Homo sapiens OX=9606 GN=PSMD2 PE=1 SV=3	4	13	13	13	18.9	18.9	18.9	100.2	908	0	29.791	44119000	16
O43242	PSMD3	26S proteasome non-ATPase regulatory subunit 3 OS=Homo sapiens OX=9606 GN=PSMD3 PE=1 SV=2	2	4	4	4	9.2	9.2	9.2	60.977	534	0	7.2143	4325200	4
A6PVX3	PSMD4	26S proteasome non-ATPase regulatory subunit 4 (Fragment) OS=Homo sapiens OX=9606 GN=PSMD4 PE=1 SV=1	3	2	2	2	16.3	16.3	16.3	21.783	203	0	5.7668	11596000	2
Q16401	PSMD5	26S proteasome non-ATPase regulatory subunit 5 OS=Homo sapiens OX=9606 GN=PSMD5 PE=1 SV=3	2	6	6	6	13.3	13.3	13.3	56.195	504	0	9.4641	7420300	6
P51665	PSMD7	26S proteasome non-ATPase regulatory subunit 7 OS=Homo sapiens OX=9606 GN=PSMD7 PE=1 SV=2	3	3	3	3	16	16	16	37.025	324	0	5.012	3250800	3
K7EJC1	PSMD8	26S proteasome non-ATPase regulatory subunit 8 OS=Homo sapiens OX=9606 GN=PSMD8 PE=1 SV=1	4	3	3	3	18.6	18.6	18.6	19.781	172	0	2.362	5399500	2
Q06323	PSME1	Proteasome activator complex subunit 1 OS=Homo sapiens OX=9606 GN=PSME1 PE=1 SV=1	3	2	2	2	5.6	5.6	5.6	28.723	249	0	2.261	1601200	2
H0YM70	PSME2	Proteasome activator complex subunit 2 OS=Homo sapiens OX=9606 GN=PSME2 PE=1 SV=1	4	3	3	3	18	18	18	26.011	228	0	6.0358	2518300	4
K9J957	PSME3	Proteasome activator complex subunit 3 OS=Homo sapiens OX=9606 GN=PSME3 PE=1 SV=1	11	6	6	6	30.7	30.7	30.7	26.867	231	0	9.4375	11981000	6
C9JBI3	PSPH	Phosphoserine phosphatase (Fragment) OS=Homo sapiens OX=9606 GN=PSPH PE=1 SV=1	5	9	9	9	42.2	42.2	42.2	20.745	187	0	17.808	34072000	9
A6NLN1	PTBP1	Polypyrimidine tract binding protein 1, isoform CRA_b OS=Homo sapiens OX=9606 GN=PTBP1 PE=1 SV=4	10	3	3	3	6.8	6.8	6.8	56.51	527	0	12.171	4123400	3
Q9H7Z7	PTGES2	Prostaglandin E synthase 2 OS=Homo sapiens OX=9606 GN=PTGES2 PE=1 SV=1	3	7	7	7	28.4	28.4	28.4	41.943	377	0	17.683	40121000	8
Q15185	PTGES3	Prostaglandin E synthase 3 OS=Homo sapiens OX=9606 GN=PTGES3 PE=1 SV=1	2	2	2	2	12.5	12.5	12.5	18.697	160	0	8.0567	22580000	3
F2Z3J9	PTGR1	Prostaglandin reductase 1 OS=Homo sapiens OX=9606 GN=PTGR1 PE=1 SV=3	4	4	4	4	16.3	16.3	16.3	32.729	300	0	6.9798	5733900	3
A0A087X296	PTGS1	Prostaglandin G/H synthase 1 OS=Homo sapiens OX=9606 GN=PTGS1 PE=1 SV=1	4	3	3	3	10	10	10	63.286	551	0	12.296	7250900	6
A6PVN5	PTPA	Serine/threonine-protein phosphatase 2A activator OS=Homo sapiens OX=9606 GN=PTPA PE=1 SV=1	12	3	3	3	11.2	11.2	11.2	37.375	329	0	4.7868	3653400	2
A0A0J9YYL3	PUF60	Poly(U)-binding-splicing factor PUF60 (Fragment) OS=Homo sapiens OX=9606 GN=PUF60 PE=1 SV=1	12	3	3	3	6.5	6.5	6.5	54.626	505	0	4.9455	2351300	3
Q15274	QPRT	Nicotinate-nucleotide pyrophosphorylase [carboxylating] OS=Homo sapiens OX=9606 GN=QPRT PE=1 SV=3	2	4	4	4	14.5	14.5	14.5	30.845	297	0	8.4035	30665000	5
P61026	RAB10	Ras-related protein Rab-10 OS=Homo sapiens OX=9606 GN=RAB10 PE=1 SV=1	2	4	3	3	19	13.5	13.5	22.541	200	0	4.7461	85663000	3
H3BMH2	RAB11A	Ras-related protein Rab-11A (Fragment) OS=Homo sapiens OX=9606 GN=RAB11A PE=4 SV=1	6	9	9	9	58.1	58.1	58.1	17.668	155	0	17.58	73977000	10
P61106	RAB14	Ras-related protein Rab-14 OS=Homo sapiens OX=9606 GN=RAB14 PE=1 SV=4	2	9	9	9	58.1	58.1	58.1	23.897	215	0	34.633	30147000	13
A0A087X163	RAB18	Ras-related protein Rab-18 OS=Homo sapiens OX=9606 GN=RAB18 PE=1 SV=1	8	3	3	3	17	17	17	20.42	182	0	4.433	6108100	4
Q9H0U4	RAB1B	Ras-related protein Rab-1B OS=Homo sapiens OX=9606 GN=RAB1B PE=1 SV=1	13	8	8	4	46.8	46.8	34.3	22.171	201	0	18.282	64125000	11
Q9UL25	RAB21	Ras-related protein Rab-21 OS=Homo sapiens OX=9606 GN=RAB21 PE=1 SV=3	1	2	2	2	12	12	12	24.347	225	0	7.0911	1480100	3
P61019	RAB2A	Ras-related protein Rab-2A OS=Homo sapiens OX=9606 GN=RAB2A PE=1 SV=1	10	9	9	9	45.3	45.3	45.3	23.545	212	0	25.277	23055000	11
P51148	RAB5C	Ras-related protein Rab-5C OS=Homo sapiens OX=9606 GN=RAB5C PE=1 SV=2	16	5	5	5	28.2	28.2	28.2	23.482	216	0	9.1444	25380000	4
P20340	RAB6A	Ras-related protein Rab-6A OS=Homo sapiens OX=9606 GN=RAB6A PE=1 SV=3	7	5	5	4	31.2	31.2	26	23.593	208	0	11.392	42280000	6
P51149	RAB7A	Ras-related protein Rab-7a OS=Homo sapiens OX=9606 GN=RAB7A PE=1 SV=1	7	10	10	10	57	57	57	23.489	207	0	27.838	50126000	8
P51151	RAB9A	Ras-related protein Rab-9A OS=Homo sapiens OX=9606 GN=RAB9A PE=1 SV=1	3	4	4	4	23.4	23.4	23.4	22.837	201	0	7.5771	7721400	4
P63000	RAC1	Ras-related C3 botulinum toxin substrate 1 OS=Homo sapiens OX=9606 GN=RAC1 PE=1 SV=1	8	9	9	8	42.7	42.7	37	21.45	192	0	16.571	31330000	18
P63244	RACK1	Receptor of activated protein C kinase 1 OS=Homo sapiens OX=9606 GN=RACK1 PE=1 SV=3	21	5	5	5	19.2	19.2	19.2	35.076	317	0	12.845	18052000	9
Q5W0S5	RAD23B	UV excision repair protein RAD23 homolog B (Fragment) OS=Homo sapiens OX=9606 GN=RAD23B PE=1 SV=1	3	4	4	3	32.2	32.2	26.7	15.213	146	0	6.4239	6228800	3
P11233	RALA	Ras-related protein Ral-A OS=Homo sapiens OX=9606 GN=RALA PE=1 SV=1	8	4	4	4	26.2	26.2	26.2	23.567	206	0	20.782	36060000	8
P62826	RAN	GTP-binding nuclear protein Ran OS=Homo sapiens OX=9606 GN=RAN PE=1 SV=3	6	16	16	16	56.9	56.9	56.9	24.423	216	0	80.566	145240000	27
P43487	RANBP1	Ran-specific GTPase-activating protein OS=Homo sapiens OX=9606 GN=RANBP1 PE=1 SV=1	7	6	6	6	39.3	39.3	39.3	23.31	201	0	22.072	46472000	11
P54136	RARS1	Arginine--tRNA ligase, cytoplasmic OS=Homo sapiens OX=9606 GN=RARS PE=1 SV=2	3	8	8	8	12.6	12.6	12.6	75.378	660	0	11.773	10041000	10
Q09028	RBBP4	Histone-binding protein RBBP4 OS=Homo sapiens OX=9606 GN=RBBP4 PE=1 SV=3	10	5	5	3	20.2	20.2	16.5	47.655	425	0	8.7007	12651000	5
E9PC52	RBBP7	Histone-binding protein RBBP7 OS=Homo sapiens OX=9606 GN=RBBP7 PE=1 SV=1	3	4	2	2	13.5	9.6	9.6	46.938	416	0	9.9523	4384800	3
H0Y6E7	RBMX	RNA-binding motif protein, X chromosome (Fragment) OS=Homo sapiens OX=9606 GN=RBMX PE=1 SV=2	8	3	3	3	12.7	12.7	12.7	31.745	292	0	4.9303	3138500	3
Q15293	RCN1	Reticulocalbin-1 OS=Homo sapiens OX=9606 GN=RCN1 PE=1 SV=1	2	6	6	6	28.1	28.1	28.1	38.89	331	0	21.432	29568000	9
Q96D15	RCN3	Reticulocalbin-3 OS=Homo sapiens OX=9606 GN=RCN3 PE=1 SV=1	3	2	2	2	11	11	11	37.493	328	0	4.9466	5694900	3
P35241	RDX	Radixin OS=Homo sapiens OX=9606 GN=RDX PE=1 SV=1	4	17	7	7	25.4	13.4	13.4	68.563	583	0	9.0271	7683900	5
Q00765	REEP5	Receptor expression-enhancing protein 5 OS=Homo sapiens OX=9606 GN=REEP5 PE=1 SV=3	5	4	4	4	19	19	19	21.493	189	0	5.0899	4170800	5
H0YG54	REXO2	Oligoribonuclease, mitochondrial OS=Homo sapiens OX=9606 GN=REXO2 PE=1 SV=2	4	7	7	7	34.6	34.6	34.6	21.848	188	0	15.049	20335000	8
P61586	RHOA	Transforming protein RhoA OS=Homo sapiens OX=9606 GN=RHOA PE=1 SV=1	11	6	6	3	34.7	34.7	21.2	21.768	193	0	23.102	36566000	8
P13489	RNH1	Ribonuclease inhibitor OS=Homo sapiens OX=9606 GN=RNH1 PE=1 SV=2	5	4	4	4	12.4	12.4	12.4	49.973	461	0	7.1542	7634300	7
A6NKB8	RNPEP	Aminopeptidase B OS=Homo sapiens OX=9606 GN=RNPEP PE=1 SV=1	5	4	4	4	10.6	10.6	10.6	68.168	611	0	11.429	6097300	5
P10155	RO60	60 kDa SS-A/Ro ribonucleoprotein OS=Homo sapiens OX=9606 GN=RO60 PE=1 SV=2	3	6	6	6	14.7	14.7	14.7	60.67	538	0	13.305	22308000	9
X1WI28	RPL10	60S ribosomal protein L10 (Fragment) OS=Homo sapiens OX=9606 GN=RPL10 PE=1 SV=7	10	8	8	8	34	34	34	22.975	200	0	19.583	32549000	12
P62906	RPL10A	60S ribosomal protein L10a OS=Homo sapiens OX=9606 GN=RPL10A PE=1 SV=2	1	6	6	6	31.3	31.3	31.3	24.831	217	0	16.039	20448000	9
Q5VVC8	RPL11	60S ribosomal protein L11 OS=Homo sapiens OX=9606 GN=RPL11 PE=1 SV=2	2	5	5	5	27.5	27.5	27.5	19.024	167	0	6.5609	7162000	4
P30050	RPL12	60S ribosomal protein L12 OS=Homo sapiens OX=9606 GN=RPL12 PE=1 SV=1	1	3	3	3	27.9	27.9	27.9	17.818	165	0	4.9645	6187700	3
P26373	RPL13	60S ribosomal protein L13 OS=Homo sapiens OX=9606 GN=RPL13 PE=1 SV=4	5	11	11	11	40.8	40.8	40.8	24.261	211	0	20.153	28611000	12
P40429	RPL13A	60S ribosomal protein L13a OS=Homo sapiens OX=9606 GN=RPL13A PE=1 SV=2	6	6	6	6	24.1	24.1	24.1	23.577	203	0	6.6879	25047000	10
E7EPB3	RPL14	60S ribosomal protein L14 OS=Homo sapiens OX=9606 GN=RPL14 PE=1 SV=1	2	6	6	6	54	54	54	14.558	124	0	11.179	25523000	11
E7EX53	RPL15	Ribosomal protein L15 (Fragment) OS=Homo sapiens OX=9606 GN=RPL15 PE=1 SV=1	6	2	2	2	18.8	18.8	18.8	15.722	133	0	2.9204	13516000	2
A0A087WXM6	RPL17	60S ribosomal protein L17 (Fragment) OS=Homo sapiens OX=9606 GN=RPL17 PE=1 SV=1	12	6	6	6	42	42	42	19.586	169	0	17.474	6609000	7
H0YHA7	RPL18	60S ribosomal protein L18 (Fragment) OS=Homo sapiens OX=9606 GN=RPL18 PE=1 SV=1	7	9	9	9	47.3	47.3	47.3	18.863	167	0	22.948	77355000	14
M0R3D6	RPL18A	60S ribosomal protein L18a (Fragment) OS=Homo sapiens OX=9606 GN=RPL18A PE=1 SV=1	5	7	7	7	41.8	41.8	41.8	16.714	141	0	9.4927	9281300	6
J3QR09	RPL19	Ribosomal protein L19 OS=Homo sapiens OX=9606 GN=RPL19 PE=1 SV=1	3	5	5	5	22.8	22.8	22.8	23.134	193	0	10.915	32307000	9
P46778	RPL21	60S ribosomal protein L21 OS=Homo sapiens OX=9606 GN=RPL21 PE=1 SV=2	4	7	7	7	42.5	42.5	42.5	18.565	160	0	10.71	32196000	6
K7EMH1	RPL22	60S ribosomal protein L22 (Fragment) OS=Homo sapiens OX=9606 GN=RPL22 PE=1 SV=1	10	4	4	4	50.6	50.6	50.6	10.422	89	0	10.096	33185000	6
C9JD32	RPL23	60S ribosomal protein L23 (Fragment) OS=Homo sapiens OX=9606 GN=RPL23 PE=1 SV=1	6	5	5	5	31.9	31.9	31.9	9.6694	91	0	15.563	8376400	6
K7EMA7	RPL23A	60S ribosomal protein L23a OS=Homo sapiens OX=9606 GN=RPL23A PE=1 SV=1	6	4	4	4	47.1	47.1	47.1	7.9232	70	0	8.9182	13542000	4
C9JXB8	RPL24	60S ribosomal protein L24 OS=Homo sapiens OX=9606 GN=RPL24 PE=1 SV=1	3	3	3	3	20.7	20.7	20.7	14.369	121	0	4.4116	6813800	5
J3QRI7	RPL26	60S ribosomal protein L26 (Fragment) OS=Homo sapiens OX=9606 GN=RPL26 PE=4 SV=1	10	4	4	4	43	43	43	12.63	107	0	7.3099	17892000	4
P61353	RPL27	60S ribosomal protein L27 OS=Homo sapiens OX=9606 GN=RPL27 PE=1 SV=2	4	5	5	5	48.5	48.5	48.5	15.798	136	0	8.8049	23508000	8
E9PLL6	RPL27A	60S ribosomal protein L27a OS=Homo sapiens OX=9606 GN=RPL27A PE=1 SV=1	4	3	3	3	24.1	24.1	24.1	12.201	108	0	4.4085	19583000	5
H0YMF4	RPL28	60S ribosomal protein L28 OS=Homo sapiens OX=9606 GN=RPL28 PE=1 SV=1	4	3	3	3	33	33	33	12.39	112	0	7.0807	10441000	6
P47914	RPL29	60S ribosomal protein L29 OS=Homo sapiens OX=9606 GN=RPL29 PE=1 SV=2	2	2	2	2	14.5	14.5	14.5	17.752	159	0	4.0266	4085700	2
P39023	RPL3	60S ribosomal protein L3 OS=Homo sapiens OX=9606 GN=RPL3 PE=1 SV=2	7	6	6	6	12.7	12.7	12.7	46.108	403	0	11.189	9653500	8
E5RI99	RPL30	60S ribosomal protein L30 (Fragment) OS=Homo sapiens OX=9606 GN=RPL30 PE=1 SV=1	4	3	3	3	26.3	26.3	26.3	12.656	114	0	6.9842	8018500	3
D3YTB1	RPL32	60S ribosomal protein L32 (Fragment) OS=Homo sapiens OX=9606 GN=RPL32 PE=1 SV=1	4	7	7	7	50.4	50.4	50.4	15.616	133	0	12.9	30848000	8
P49207	RPL34	60S ribosomal protein L34 OS=Homo sapiens OX=9606 GN=RPL34 PE=1 SV=3	1	3	3	3	17.1	17.1	17.1	13.293	117	0	3.4799	7438400	2
P42766	RPL35	60S ribosomal protein L35 OS=Homo sapiens OX=9606 GN=RPL35 PE=1 SV=2	2	6	6	6	38.2	38.2	38.2	14.551	123	0	14.838	16913000	6
F8WBS5	RPL35A	60S ribosomal protein L35a OS=Homo sapiens OX=9606 GN=RPL35A PE=1 SV=1	4	3	3	3	45.5	45.5	45.5	6.4725	55	0	5.4095	5384500	6
Q9Y3U8	RPL36	60S ribosomal protein L36 OS=Homo sapiens OX=9606 GN=RPL36 PE=1 SV=3	3	6	6	6	45.7	45.7	45.7	12.254	105	0	6.2261	9721000	6
J3KT73	RPL38	60S ribosomal protein L38 OS=Homo sapiens OX=9606 GN=RPL38 PE=1 SV=1	4	2	2	2	39.1	39.1	39.1	7.5649	64	0	5.835	4886700	3
P36578	RPL4	60S ribosomal protein L4 OS=Homo sapiens OX=9606 GN=RPL4 PE=1 SV=5	4	22	22	22	48.7	48.7	48.7	47.697	427	0	55.755	104480000	25
A0A2R8Y6J3	RPL5	60S ribosomal protein L5 (Fragment) OS=Homo sapiens OX=9606 GN=RPL5 PE=1 SV=1	4	11	11	11	52.5	52.5	52.5	27.045	238	0	25.898	37007000	15
Q02878	RPL6	60S ribosomal protein L6 OS=Homo sapiens OX=9606 GN=RPL6 PE=1 SV=3	7	14	14	14	42.7	42.7	42.7	32.728	288	0	32.413	39528000	13
P18124	RPL7	60S ribosomal protein L7 OS=Homo sapiens OX=9606 GN=RPL7 PE=1 SV=1	4	13	13	13	48	48	48	29.225	248	0	24.879	68448000	18
P62424	RPL7A	60S ribosomal protein L7a OS=Homo sapiens OX=9606 GN=RPL7A PE=1 SV=2	3	14	14	14	49.6	49.6	49.6	29.995	266	0	38.695	60138000	17
P62917	RPL8	60S ribosomal protein L8 OS=Homo sapiens OX=9606 GN=RPL8 PE=1 SV=2	5	8	8	8	23.3	23.3	23.3	28.024	257	0	12.597	37104000	14
H0Y9R4	RPL9	60S ribosomal protein L9 (Fragment) OS=Homo sapiens OX=9606 GN=RPL9 PE=1 SV=2	6	2	2	2	24.4	24.4	24.4	10.045	90	0	4.6694	5153500	2
G3V210	RPLP0	60S acidic ribosomal protein P0 OS=Homo sapiens OX=9606 GN=RPLP0 PE=1 SV=1	12	6	6	6	48.2	48.2	48.2	18.27	166	0	17.442	46523000	10
P04843	RPN1	Dolichyl-diphosphooligosaccharide--protein glycosyltransferase subunit 1 OS=Homo sapiens OX=9606 GN=RPN1 PE=1 SV=1	2	3	3	3	6.1	6.1	6.1	68.569	607	0	6.5264	3231700	2
Q5JYR4	RPN2	Dolichyl-diphosphooligosaccharide--protein glycosyltransferase subunit 2 (Fragment) OS=Homo sapiens OX=9606 GN=RPN2 PE=1 SV=8	4	3	3	3	31.3	31.3	31.3	18.17	166	0	8.7965	2674700	4
A0A1W2PQS6	RPS10-NUDT3	RPS10-NUDT3 readthrough OS=Homo sapiens OX=9606 GN=RPS10-NUDT3 PE=4 SV=1	7	3	3	2	12.4	12.4	9.3	33.14	291	0	4.3863	1889600	3
M0QZC5	RPS11	40S ribosomal protein S11 OS=Homo sapiens OX=9606 GN=RPS11 PE=1 SV=1	4	5	5	5	40.7	40.7	40.7	13.997	118	0	13.967	13966000	4
P25398	RPS12	40S ribosomal protein S12 OS=Homo sapiens OX=9606 GN=RPS12 PE=1 SV=3	1	5	5	5	43.9	43.9	43.9	14.515	132	0	12.747	23960000	6
P62277	RPS13	40S ribosomal protein S13 OS=Homo sapiens OX=9606 GN=RPS13 PE=1 SV=2	3	6	6	6	39.1	39.1	39.1	17.222	151	0	13.425	19717000	6
A0A2R8Y811	RPS14	40S ribosomal protein S14 (Fragment) OS=Homo sapiens OX=9606 GN=RPS14 PE=1 SV=1	3	5	5	5	34.7	34.7	34.7	16.159	150	0	10.82	31047000	8
K7EM56	RPS15	40S ribosomal protein S15 OS=Homo sapiens OX=9606 GN=RPS15 PE=1 SV=2	8	2	2	2	22.3	22.3	22.3	12.99	112	0	3.4363	2038400	2
I3L3P7	RPS15A	40S ribosomal protein S15a OS=Homo sapiens OX=9606 GN=RPS15A PE=1 SV=1	7	5	5	2	43	43	20	11.477	100	0	8.8055	12697000	7
M0R210	RPS16	40S ribosomal protein S16 OS=Homo sapiens OX=9606 GN=RPS16 PE=1 SV=1	6	5	5	5	37.2	37.2	37.2	14.419	129	0	8.2149	14804000	5
P08708	RPS17	40S ribosomal protein S17 OS=Homo sapiens OX=9606 GN=RPS17 PE=1 SV=2	5	2	2	2	16.3	16.3	16.3	15.55	135	0	3.099	5147300	3
P62269	RPS18	40S ribosomal protein S18 OS=Homo sapiens OX=9606 GN=RPS18 PE=1 SV=3	4	11	11	11	62.5	62.5	62.5	17.718	152	0	17.74	19670000	7
P39019	RPS19	40S ribosomal protein S19 OS=Homo sapiens OX=9606 GN=RPS19 PE=1 SV=2	6	6	6	6	40.7	40.7	40.7	16.06	145	0	12.089	13704000	6
P15880	RPS2	40S ribosomal protein S2 OS=Homo sapiens OX=9606 GN=RPS2 PE=1 SV=2	7	7	7	7	23.2	23.2	23.2	31.324	293	0	12.296	26073000	11
P60866	RPS20	40S ribosomal protein S20 OS=Homo sapiens OX=9606 GN=RPS20 PE=1 SV=1	4	6	6	6	37.8	37.8	37.8	13.373	119	0	11.787	24080000	9
Q8WVC2	RPS21	40S ribosomal protein S21 OS=Homo sapiens OX=9606 GN=RPS21 PE=1 SV=1	3	3	3	3	45.7	45.7	45.7	8.85	81	0	3.2136	3742500	1
P62266	RPS23	40S ribosomal protein S23 OS=Homo sapiens OX=9606 GN=RPS23 PE=1 SV=3	2	2	2	2	16.1	16.1	16.1	15.807	143	0	5.1204	7574800	4
P62851	RPS25	40S ribosomal protein S25 OS=Homo sapiens OX=9606 GN=RPS25 PE=1 SV=1	1	3	3	3	17.6	17.6	17.6	13.742	125	0	8.4633	13747000	4
P62857	RPS28	40S ribosomal protein S28 OS=Homo sapiens OX=9606 GN=RPS28 PE=1 SV=1	1	3	3	3	31.9	31.9	31.9	7.8409	69	0	8.2719	3078300	5
P23396	RPS3	40S ribosomal protein S3 OS=Homo sapiens OX=9606 GN=RPS3 PE=1 SV=2	12	8	8	8	39.1	39.1	39.1	26.688	243	0	11.321	18310000	9
P61247	RPS3A	40S ribosomal protein S3a OS=Homo sapiens OX=9606 GN=RPS3A PE=1 SV=2	12	10	10	10	39.8	39.8	39.8	29.945	264	0	46.536	52674000	16
P62701	RPS4X	40S ribosomal protein S4, X isoform OS=Homo sapiens OX=9606 GN=RPS4X PE=1 SV=2	2	13	13	6	42.6	42.6	24	29.597	263	0	28.055	52740000	17
M0R0F0	RPS5	40S ribosomal protein S5 (Fragment) OS=Homo sapiens OX=9606 GN=RPS5 PE=1 SV=1	4	6	6	6	28.5	28.5	28.5	22.391	200	0	13.353	59533000	6
P62753	RPS6	40S ribosomal protein S6 OS=Homo sapiens OX=9606 GN=RPS6 PE=1 SV=1	3	5	5	5	24.9	24.9	24.9	28.68	249	0	8.1758	17006000	8
A0A2R8Y623	RPS7	40S ribosomal protein S7 (Fragment) OS=Homo sapiens OX=9606 GN=RPS7 PE=1 SV=1	3	3	3	3	23.1	23.1	23.1	19.405	169	0	10.793	37854000	4
Q5JR95	RPS8	40S ribosomal protein S8 OS=Homo sapiens OX=9606 GN=RPS8 PE=1 SV=1	2	6	6	6	28.2	28.2	28.2	21.879	188	0	18.62	31247000	10
A0A024R4M0	RPS9	40S ribosomal protein S9 OS=Homo sapiens OX=9606 GN=RPS9 PE=1 SV=1	6	9	9	9	28.4	28.4	28.4	22.591	194	0	13.753	30981000	10
C9J9K3	RPSA	40S ribosomal protein SA (Fragment) OS=Homo sapiens OX=9606 GN=RPSA PE=1 SV=8	6	8	8	8	38	38	38	29.404	263	0	15.296	36945000	9
F8W914	RTN4	Reticulon OS=Homo sapiens OX=9606 GN=RTN4 PE=1 SV=1	4	4	4	4	21.7	21.7	21.7	37.144	345	0	7.6512	24374000	4
X6R2L4	RUVBL2	RuvB-like helicase OS=Homo sapiens OX=9606 GN=RUVBL2 PE=1 SV=1	4	2	2	2	9.7	9.7	9.7	27.93	259	0	3.0649	1775200	3
P31949	S100A11	Protein S100-A11 OS=Homo sapiens OX=9606 GN=S100A11 PE=1 SV=2	1	2	2	2	27.6	27.6	27.6	11.74	105	0	9.9652	3345000	2
P26447	S100A4	Protein S100-A4 OS=Homo sapiens OX=9606 GN=S100A4 PE=1 SV=1	1	5	5	5	31.7	31.7	31.7	11.728	101	0	10.416	74508000	11
Q9UBE0	SAE1	SUMO-activating enzyme subunit 1 OS=Homo sapiens OX=9606 GN=SAE1 PE=1 SV=1	8	7	7	7	26	26	26	38.449	346	0	16.815	16603000	8
P82979	SARNP	SAP domain-containing ribonucleoprotein OS=Homo sapiens OX=9606 GN=SARNP PE=1 SV=3	4	3	3	3	18.1	18.1	18.1	23.671	210	0	4.3657	2201800	3
P49591	SARS1	Serine--tRNA ligase, cytoplasmic OS=Homo sapiens OX=9606 GN=SARS PE=1 SV=3	2	5	5	5	11.1	11.1	11.1	58.777	514	0	5.0373	8727700	6
A0A087X020	SBDS	Ribosome maturation protein SBDS OS=Homo sapiens OX=9606 GN=SBDS PE=1 SV=1	2	3	3	3	11.6	11.6	11.6	28.864	250	0	3.1827	3064000	1
O14828	SCAMP3	Secretory carrier-associated membrane protein 3 OS=Homo sapiens OX=9606 GN=SCAMP3 PE=1 SV=3	1	4	4	4	13.5	13.5	13.5	38.287	347	0	9.9373	8449200	5
Q8NBX0	SCCPDH	Saccharopine dehydrogenase-like oxidoreductase OS=Homo sapiens OX=9606 GN=SCCPDH PE=1 SV=1	1	10	10	10	33.1	33.1	33.1	47.151	429	0	41.67	73511000	16
Q9BRK5	SDF4	45 kDa calcium-binding protein OS=Homo sapiens OX=9606 GN=SDF4 PE=1 SV=1	3	3	3	3	9.4	9.4	9.4	41.806	362	0	16.112	8838400	4
G5EA31	SEC24C	Protein transport protein Sec24C OS=Homo sapiens OX=9606 GN=SEC24C PE=1 SV=1	5	2	2	2	1.9	1.9	1.9	111.98	1042	0	2.7825	1012600	1
Q13228	SELENBP1	Methanethiol oxidase OS=Homo sapiens OX=9606 GN=SELENBP1 PE=1 SV=2	6	5	5	5	16.1	16.1	16.1	52.39	472	0	6.6019	10643000	5
C9J2Q4	SEPTIN2	Septin 2 (Fragment) OS=Homo sapiens OX=9606 GN=SEPTIN2 PE=1 SV=1	11	2	2	2	14.7	14.7	14.7	21.087	184	0	5.3404	1743800	3
Q8NC51	SERBP1	Plasminogen activator inhibitor 1 RNA-binding protein OS=Homo sapiens OX=9606 GN=SERBP1 PE=1 SV=2	1	4	4	4	10.5	10.5	10.5	44.965	408	0	7.5363	3212300	4
P30740	SERPINB1	Leukocyte elastase inhibitor OS=Homo sapiens OX=9606 GN=SERPINB1 PE=1 SV=1	1	8	8	8	19.8	19.8	19.8	42.741	379	0	24.294	20789000	8
P35237	SERPINB6	Serpin B6 OS=Homo sapiens OX=9606 GN=SERPINB6 PE=1 SV=3	14	21	21	21	69.7	69.7	69.7	42.621	376	0	66.168	114710000	26
P50454	SERPINH1	Serpin H1 OS=Homo sapiens OX=9606 GN=SERPINH1 PE=1 SV=2	13	18	18	18	48.3	48.3	48.3	46.44	418	0	143.82	194720000	36
Q01105	SET	Protein SET OS=Homo sapiens OX=9606 GN=SET PE=1 SV=3	4	10	10	10	42.1	42.1	42.1	33.488	290	0	37.501	91348000	18
Q15393	SF3B3	Splicing factor 3B subunit 3 OS=Homo sapiens OX=9606 GN=SF3B3 PE=1 SV=4	1	2	2	2	2.5	2.5	2.5	135.58	1217	0	5.4613	1315500	3
P31947	SFN	14-3-3 protein sigma OS=Homo sapiens OX=9606 GN=SFN PE=1 SV=1	1	16	14	14	52	48	48	27.774	248	0	65.821	105250000	18
P23246	SFPQ	Splicing factor, proline- and glutamine-rich OS=Homo sapiens OX=9606 GN=SFPQ PE=1 SV=2	1	2	2	2	4.5	4.5	4.5	76.149	707	0	3.893	2341500	2
Q9H9B4	SFXN1	Sideroflexin-1 OS=Homo sapiens OX=9606 GN=SFXN1 PE=1 SV=4	5	17	17	16	59.9	59.9	54	35.619	322	0	51.187	120050000	32
O43765	SGTA	Small glutamine-rich tetratricopeptide repeat-containing protein alpha OS=Homo sapiens OX=9606 GN=SGTA PE=1 SV=1	1	3	3	3	10.2	10.2	10.2	34.063	313	0	2.5806	3522400	2
P34897	SHMT2	Serine hydroxymethyltransferase, mitochondrial OS=Homo sapiens OX=9606 GN=SHMT2 PE=1 SV=3	4	2	2	2	4.6	4.6	4.6	55.992	504	0	2.2235	1022200	1
P53985	SLC16A1	Monocarboxylate transporter 1 OS=Homo sapiens OX=9606 GN=SLC16A1 PE=1 SV=3	3	3	3	3	7	7	7	53.944	500	0	9.8171	7388200	3
Q15758	SLC1A5	Neutral amino acid transporter B(0) OS=Homo sapiens OX=9606 GN=SLC1A5 PE=1 SV=2	2	4	4	4	7.2	7.2	7.2	56.598	541	0	5.3923	2665900	4
B4DP62	SLC25A1	Solute carrier family 25 (Mitochondrial carrier citrate transporter), member 1, isoform CRA_b OS=Homo sapiens OX=9606 GN=SLC25A1 PE=1 SV=1	2	3	3	3	12.5	12.5	12.5	23.21	208	0	3.9154	3759900	4
Q9UBX3	SLC25A10	Mitochondrial dicarboxylate carrier OS=Homo sapiens OX=9606 GN=SLC25A10 PE=1 SV=2	4	6	6	6	27.5	27.5	27.5	31.282	287	0	13.275	9846100	6
I3L1P8	SLC25A11	Mitochondrial 2-oxoglutarate/malate carrier protein (Fragment) OS=Homo sapiens OX=9606 GN=SLC25A11 PE=1 SV=1	2	4	4	4	17.9	17.9	17.9	32.182	296	0	11.655	13752000	7
Q9H936	SLC25A22	Mitochondrial glutamate carrier 1 OS=Homo sapiens OX=9606 GN=SLC25A22 PE=1 SV=1	18	5	5	5	16.7	16.7	16.7	34.47	323	0	11.835	8745000	4
Q6NUK1	SLC25A24	Calcium-binding mitochondrial carrier protein SCaMC-1 OS=Homo sapiens OX=9606 GN=SLC25A24 PE=1 SV=2	3	8	8	8	17.6	17.6	17.6	53.354	477	0	12.518	18078000	9
Q00325	SLC25A3	Phosphate carrier protein, mitochondrial OS=Homo sapiens OX=9606 GN=SLC25A3 PE=1 SV=2	5	12	12	12	35.6	35.6	35.6	40.094	362	0	47.487	100070000	20
P05141	SLC25A5	ADP/ATP translocase 2 OS=Homo sapiens OX=9606 GN=SLC25A5 PE=1 SV=7	2	23	23	12	48.3	48.3	24.8	32.852	298	0	133.26	397000000	42
P12236	SLC25A6	ADP/ATP translocase 3 OS=Homo sapiens OX=9606 GN=SLC25A6 PE=1 SV=4	3	18	7	7	53	26.5	26.5	32.866	298	0	28.986	17530000	8
P11166	SLC2A1	Solute carrier family 2, facilitated glucose transporter member 1 OS=Homo sapiens OX=9606 GN=SLC2A1 PE=1 SV=2	3	5	5	5	8.9	8.9	8.9	54.083	492	0	7.1894	12298000	4
F5GZS6	SLC3A2	4F2 cell-surface antigen heavy chain OS=Homo sapiens OX=9606 GN=SLC3A2 PE=1 SV=1	9	18	18	18	33.4	33.4	33.4	64.872	599	0	68.034	217460000	35
Q01650	SLC7A5	Large neutral amino acids transporter small subunit 1 OS=Homo sapiens OX=9606 GN=SLC7A5 PE=1 SV=2	6	4	4	4	8.1	8.1	8.1	55.01	507	0	11.561	40506000	5
O14745	SLC9A3R1	Na(+)/H(+) exchange regulatory cofactor NHE-RF1 OS=Homo sapiens OX=9606 GN=SLC9A3R1 PE=1 SV=4	2	5	5	5	19.3	19.3	19.3	38.868	358	0	6.9355	13406000	5
Q15599	SLC9A3R2	Na(+)/H(+) exchange regulatory cofactor NHE-RF2 OS=Homo sapiens OX=9606 GN=SLC9A3R2 PE=1 SV=2	4	3	3	3	10.7	10.7	10.7	37.413	337	0	3.6987	2182500	2
P52788	SMS	Spermine synthase OS=Homo sapiens OX=9606 GN=SMS PE=1 SV=2	2	2	2	2	4.4	4.4	4.4	41.268	366	0	2.2828	4244300	2
Q7KZF4	SND1	Staphylococcal nuclease domain-containing protein 1 OS=Homo sapiens OX=9606 GN=SND1 PE=1 SV=1	2	3	3	3	5.3	5.3	5.3	102	910	0	5.358	4656100	3
J3QLI9	SNRPD1	Small nuclear ribonucleoprotein Sm D1 OS=Homo sapiens OX=9606 GN=SNRPD1 PE=1 SV=1	2	2	2	2	44	44	44	8.3926	75	0	5.537	2840600	2
J3QLE5	SNRPN	Small nuclear ribonucleoprotein-associated protein N (Fragment) OS=Homo sapiens OX=9606 GN=SNRPN PE=1 SV=1	5	2	2	2	8.9	8.9	8.9	17.546	169	0	2.4431	4067900	3
P00441	SOD1	Superoxide dismutase [Cu-Zn] OS=Homo sapiens OX=9606 GN=SOD1 PE=1 SV=2	2	8	8	8	70.8	70.8	70.8	15.936	154	0	63.13	49415000	11
P04179	SOD2	Superoxide dismutase [Mn], mitochondrial OS=Homo sapiens OX=9606 GN=SOD2 PE=1 SV=3	5	4	4	4	18	18	18	24.75	222	0	5.4598	8111900	6
P35270	SPR	Sepiapterin reductase OS=Homo sapiens OX=9606 GN=SPR PE=1 SV=1	1	2	2	2	13	13	13	28.048	261	0	1.971	1210800	1
P19623	SRM	Spermidine synthase OS=Homo sapiens OX=9606 GN=SRM PE=1 SV=1	5	8	8	8	28.5	28.5	28.5	33.824	302	0	23.365	29234000	14
Q9Y5M8	SRPRB	Signal recognition particle receptor subunit beta OS=Homo sapiens OX=9606 GN=SRPRB PE=1 SV=3	3	3	3	3	19.2	19.2	19.2	29.702	271	0	7.1135	1524000	3
P05455	SSB	Lupus La protein OS=Homo sapiens OX=9606 GN=SSB PE=1 SV=2	4	11	11	11	33.6	33.6	33.6	46.836	408	0	40.72	38062000	15
C9K0U8	SSBP1	Single-stranded DNA-binding protein, mitochondrial (Fragment) OS=Homo sapiens OX=9606 GN=SSBP1 PE=1 SV=1	4	2	2	2	14	14	14	14.131	121	0	2.148	2567200	2
P51571	SSR4	Translocon-associated protein subunit delta OS=Homo sapiens OX=9606 GN=SSR4 PE=1 SV=1	2	2	2	2	13.9	13.9	13.9	18.998	173	0	2.8494	4026100	1
H7C3I1	ST13	Hsc70-interacting protein (Fragment) OS=Homo sapiens OX=9606 GN=ST13 PE=1 SV=1	6	5	5	5	29.5	29.5	29.5	16.219	146	0	8.5628	12912000	6
P31948	STIP1	Stress-induced-phosphoprotein 1 OS=Homo sapiens OX=9606 GN=STIP1 PE=1 SV=1	4	24	24	24	43.3	43.3	43.3	62.639	543	0	70.889	114700000	34
Q8NBY1	STK26	Serine/threonine-protein kinase 26 OS=Homo sapiens OX=9606 GN=STK26 PE=1 SV=1	8	3	3	3	11.7	11.7	11.7	43.867	392	0	5.403	2001900	4
A2A2D0	STMN1	Stathmin (Fragment) OS=Homo sapiens OX=9606 GN=STMN1 PE=1 SV=8	4	4	4	4	43.5	43.5	43.5	9.7931	85	0	11.985	16455000	6
P27105	STOM	Erythrocyte band 7 integral membrane protein OS=Homo sapiens OX=9606 GN=STOM PE=1 SV=3	2	5	5	5	28.5	28.5	28.5	31.73	288	0	15.062	16042000	5
Q9Y3F4	STRAP	Serine-threonine kinase receptor-associated protein OS=Homo sapiens OX=9606 GN=STRAP PE=1 SV=1	2	6	6	6	30.3	30.3	30.3	38.438	350	0	14.378	6973100	4
H3BRY5	SULT1A1	Sulfotransferase (Fragment) OS=Homo sapiens OX=9606 GN=SULT1A1 PE=1 SV=1	7	5	5	3	23.5	23.5	13.5	32.625	281	0	8.9771	8054700	5
P0DMN0	SULT1A4	Sulfotransferase 1A4 OS=Homo sapiens OX=9606 GN=SULT1A4 PE=1 SV=1	4	4	2	2	21.7	12.2	12.2	34.196	295	0	7.0271	2372400	4
A8MXB9	SUMF2	Inactive C-alpha-formylglycine-generating enzyme 2 OS=Homo sapiens OX=9606 GN=SUMF2 PE=1 SV=3	14	3	3	3	13.3	13.3	13.3	31.915	286	0	8.6871	9144900	3
Q5T8U5	SURF4	Surfeit 4 OS=Homo sapiens OX=9606 GN=SURF4 PE=1 SV=1	2	2	2	2	14	14	14	21.127	186	0	14.446	3001400	2
Q96A49	SYAP1	Synapse-associated protein 1 OS=Homo sapiens OX=9606 GN=SYAP1 PE=1 SV=1	1	3	3	3	10.5	10.5	10.5	39.933	352	0	5.8868	3833800	3
O60506	SYNCRIP	Heterogeneous nuclear ribonucleoprotein Q OS=Homo sapiens OX=9606 GN=SYNCRIP PE=1 SV=2	3	6	6	2	12	12	5.6	69.602	623	0	20.11	14770000	6
X6RJP6	TAGLN2	Transgelin-2 (Fragment) OS=Homo sapiens OX=9606 GN=TAGLN2 PE=1 SV=1	2	9	9	9	50.3	50.3	50.3	21.086	187	0	53.194	51763000	10
P37837	TALDO1	Transaldolase OS=Homo sapiens OX=9606 GN=TALDO1 PE=1 SV=2	4	12	12	12	33.8	33.8	33.8	37.54	337	0	20.326	67164000	16
A0A0G2JKZ1	TAPBP	Tapasin OS=Homo sapiens OX=9606 GN=TAPBP PE=1 SV=1	10	4	4	4	9.4	9.4	9.4	47.606	448	0	5.2133	7116700	4
P26639	TARS1	Threonine--tRNA ligase, cytoplasmic OS=Homo sapiens OX=9606 GN=TARS PE=1 SV=3	10	40	40	40	56.7	56.7	56.7	83.434	723	0	116.48	242010000	59
Q9NVG8	TBC1D13	TBC1 domain family member 13 OS=Homo sapiens OX=9606 GN=TBC1D13 PE=1 SV=3	1	3	3	3	11.2	11.2	11.2	46.553	400	0	4.7178	2465400	4
E5RIW3	TBCA	Tubulin-specific chaperone A OS=Homo sapiens OX=9606 GN=TBCA PE=1 SV=1	4	3	3	3	34.5	34.5	34.5	10.08	84	0	7.6879	15147000	3
P17987	TCP1	T-complex protein 1 subunit alpha OS=Homo sapiens OX=9606 GN=TCP1 PE=1 SV=1	9	4	4	4	7.6	7.6	7.6	60.343	556	0	4.1942	5557100	2
C9JUE0	TFG	Protein TFG (Fragment) OS=Homo sapiens OX=9606 GN=TFG PE=1 SV=1	4	4	4	4	43.3	43.3	43.3	17.731	157	0	10.075	5685500	4
P02786	TFRC	Transferrin receptor protein 1 OS=Homo sapiens OX=9606 GN=TFRC PE=1 SV=2	4	29	29	29	43.9	43.9	43.9	84.87	760	0	92.279	113960000	28
P52888	THOP1	Thimet oligopeptidase OS=Homo sapiens OX=9606 GN=THOP1 PE=1 SV=2	5	4	4	4	6.2	6.2	6.2	78.839	689	0	5.0525	3765100	4
I3L252	TKFC	Triokinase/FMN cyclase (Fragment) OS=Homo sapiens OX=9606 GN=TKFC PE=1 SV=1	3	2	2	2	13.2	13.2	13.2	22.951	219	0	2.3123	2449500	2
P29401	TKT	Transketolase OS=Homo sapiens OX=9606 GN=TKT PE=1 SV=3	5	19	19	19	39.6	39.6	39.6	67.877	623	0	65.895	119940000	33
P49755	TMED10	Transmembrane emp24 domain-containing protein 10 OS=Homo sapiens OX=9606 GN=TMED10 PE=1 SV=2	2	6	6	6	31.1	31.1	31.1	24.976	219	0	15.594	27421000	10
Q7Z7H5	TMED4	Transmembrane emp24 domain-containing protein 4 OS=Homo sapiens OX=9606 GN=TMED4 PE=1 SV=1	2	2	2	2	7.5	7.5	7.5	25.943	227	0.0039841	1.3722	3597900	2
A0A0A6YYA0	TMED7-TICAM2	Protein TMED7-TICAM2 OS=Homo sapiens OX=9606 GN=TMED7-TICAM2 PE=3 SV=1	3	5	5	5	35.1	35.1	35.1	21.233	188	0	8.4594	12971000	6
Q9BVK6	TMED9	Transmembrane emp24 domain-containing protein 9 OS=Homo sapiens OX=9606 GN=TMED9 PE=1 SV=2	1	3	3	3	11.1	11.1	11.1	27.277	235	0	10.459	6296100	6
Q9BTV4	TMEM43	Transmembrane protein 43 OS=Homo sapiens OX=9606 GN=TMEM43 PE=1 SV=1	2	5	5	5	17.5	17.5	17.5	44.875	400	0	11.319	21990000	8
P63313	TMSB10	Thymosin beta-10 OS=Homo sapiens OX=9606 GN=TMSB10 PE=1 SV=2	1	3	3	3	68.2	68.2	68.2	5.0256	44	0	4.1065	6502000	3
Q9H3N1	TMX1	Thioredoxin-related transmembrane protein 1 OS=Homo sapiens OX=9606 GN=TMX1 PE=1 SV=1	1	2	2	2	8.2	8.2	8.2	31.791	280	0	3.8482	5359200	3
Q96JJ7	TMX3	Protein disulfide-isomerase TMX3 OS=Homo sapiens OX=9606 GN=TMX3 PE=1 SV=2	1	2	2	2	6.8	6.8	6.8	51.871	454	0	2.5666	4704900	1
Q92973	TNPO1	Transportin-1 OS=Homo sapiens OX=9606 GN=TNPO1 PE=1 SV=2	4	2	2	2	2.3	2.3	2.3	102.35	898	0	3.3509	1171300	2
O96008	TOMM40	Mitochondrial import receptor subunit TOM40 homolog OS=Homo sapiens OX=9606 GN=TOMM40 PE=1 SV=1	3	4	4	4	15	15	15	37.893	361	0	10.16	9308500	4
O94826	TOMM70	Mitochondrial import receptor subunit TOM70 OS=Homo sapiens OX=9606 GN=TOMM70 PE=1 SV=1	1	2	2	2	3.8	3.8	3.8	67.454	608	0	3.0971	2641900	1
Q8NFQ8	TOR1AIP2	Torsin-1A-interacting protein 2 OS=Homo sapiens OX=9606 GN=TOR1AIP2 PE=1 SV=1	1	5	5	5	18.3	18.3	18.3	51.263	470	0	10.093	5699900	8
Q53FA7	TP53I3	Quinone oxidoreductase PIG3 OS=Homo sapiens OX=9606 GN=TP53I3 PE=1 SV=2	2	2	2	2	8.4	8.4	8.4	35.536	332	0	4.56	1069300	1
P55327	TPD52	Tumor protein D52 OS=Homo sapiens OX=9606 GN=TPD52 PE=1 SV=2	4	4	4	3	32.1	32.1	27.2	24.327	224	0	8.4447	21206000	4
O43399	TPD52L2	Tumor protein D54 OS=Homo sapiens OX=9606 GN=TPD52L2 PE=1 SV=2	3	6	6	6	35.4	35.4	35.4	22.237	206	0	17.919	25870000	6
P60174	TPI1	Triosephosphate isomerase OS=Homo sapiens OX=9606 GN=TPI1 PE=1 SV=3	4	26	26	26	80.4	80.4	80.4	30.791	286	0	226.93	852740000	41
A0A087WWU8	TPM3	Tropomyosin alpha-3 chain OS=Homo sapiens OX=9606 GN=TPM3 PE=1 SV=1	5	7	7	2	31.3	31.3	9.3	26.42	227	0	23.623	30156000	11
P13693	TPT1	Translationally-controlled tumor protein OS=Homo sapiens OX=9606 GN=TPT1 PE=1 SV=1	7	5	5	5	28.5	28.5	28.5	19.595	172	0	20.399	34615000	10
O43617	TRAPPC3	Trafficking protein particle complex subunit 3 OS=Homo sapiens OX=9606 GN=TRAPPC3 PE=1 SV=1	4	2	2	2	12.8	12.8	12.8	20.274	180	0	4.8526	6207500	3
F8W8C3	TRNT1	CCA tRNA nucleotidyltransferase 1, mitochondrial (Fragment) OS=Homo sapiens OX=9606 GN=TRNT1 PE=1 SV=2	8	2	2	2	18.6	18.6	18.6	16.316	140	0	6.0171	1431700	2
E9PGT1	TSN	Translin OS=Homo sapiens OX=9606 GN=TSN PE=1 SV=1	4	8	8	8	53.4	53.4	53.4	25.572	223	0	23.01	14587000	13
Q99598	TSNAX	Translin-associated protein X OS=Homo sapiens OX=9606 GN=TSNAX PE=1 SV=1	6	5	5	5	23.8	23.8	23.8	33.112	290	0	19.381	10857000	8
B1AH87	TSPO	Putative peripheral benzodiazepine receptor-related protein (Fragment) OS=Homo sapiens OX=9606 GN=TSPO PE=1 SV=1	2	2	2	2	29	29	29	11.896	107	0	4.909	17047000	3
P68363	TUBA1B	Tubulin alpha-1B chain OS=Homo sapiens OX=9606 GN=TUBA1B PE=1 SV=1	24	19	19	4	47.9	47.9	12.2	50.151	451	0	81.456	190570000	41
Q9BQE3	TUBA1C	Tubulin alpha-1C chain OS=Homo sapiens OX=9606 GN=TUBA1C PE=1 SV=1	3	17	2	2	45	9.1	9.1	49.895	449	0	4.6808	4824200	3
Q5JP53	TUBB	Tubulin beta chain OS=Homo sapiens OX=9606 GN=TUBB PE=1 SV=1	16	23	23	4	56.1	56.1	16.9	47.766	426	0	111.74	253760000	34
P68371	TUBB4B	Tubulin beta-4B chain OS=Homo sapiens OX=9606 GN=TUBB4B PE=1 SV=1	17	23	4	4	54.2	16.4	16.4	49.83	445	0	12.518	22162000	7
Q12792	TWF1	Twinfilin-1 OS=Homo sapiens OX=9606 GN=TWF1 PE=1 SV=3	3	5	5	4	18.3	18.3	16.3	40.282	350	0	15.009	14059000	7
D6RG15	TWF2	Twinfilin-2 OS=Homo sapiens OX=9606 GN=TWF2 PE=1 SV=1	3	5	4	4	30.3	27.6	27.6	28.882	254	0	12.73	9841300	6
P10599	TXN	Thioredoxin OS=Homo sapiens OX=9606 GN=TXN PE=1 SV=3	1	4	4	4	42.9	42.9	42.9	11.737	105	0	12.031	36710000	12
Q8NBS9	TXNDC5	Thioredoxin domain-containing protein 5 OS=Homo sapiens OX=9606 GN=TXNDC5 PE=1 SV=2	1	17	17	17	42.4	42.4	42.4	47.628	432	0	49.104	65498000	21
O43396	TXNL1	Thioredoxin-like protein 1 OS=Homo sapiens OX=9606 GN=TXNL1 PE=1 SV=3	5	3	3	3	15.2	15.2	15.2	32.251	289	0	5.7712	5322800	3
E9PIR7	TXNRD1	Thioredoxin reductase 1, cytoplasmic OS=Homo sapiens OX=9606 GN=TXNRD1 PE=1 SV=1	14	11	11	11	30.7	30.7	30.7	53.166	482	0	34.91	46486000	19
A0A494C0L6	TYMP	Thymidine phosphorylase (Fragment) OS=Homo sapiens OX=9606 GN=TYMP PE=1 SV=1	5	2	2	2	9.3	9.3	9.3	29.597	289	0	3.3313	2575300	2
Q16222	UAP1	UDP-N-acetylhexosamine pyrophosphorylase OS=Homo sapiens OX=9606 GN=UAP1 PE=1 SV=3	2	10	10	10	21.6	21.6	21.6	58.768	522	0	13.825	16085000	9
P22314	UBA1	Ubiquitin-like modifier-activating enzyme 1 OS=Homo sapiens OX=9606 GN=UBA1 PE=1 SV=3	7	39	39	39	47.3	47.3	47.3	117.85	1058	0	163.99	245290000	48
Q9UBT2	UBA2	SUMO-activating enzyme subunit 2 OS=Homo sapiens OX=9606 GN=UBA2 PE=1 SV=2	6	11	11	11	17.5	17.5	17.5	71.223	640	0	21.206	42182000	14
Q8TBC4	UBA3	NEDD8-activating enzyme E1 catalytic subunit OS=Homo sapiens OX=9606 GN=UBA3 PE=1 SV=2	3	3	3	3	8.9	8.9	8.9	51.852	463	0	3.9897	8115200	3
E7EWE1	UBA5	Ubiquitin-like modifier-activating enzyme 5 OS=Homo sapiens OX=9606 GN=UBA5 PE=1 SV=1	7	2	2	2	6.9	6.9	6.9	38.753	347	0	5.3488	1149000	3
A0AVT1	UBA6	Ubiquitin-like modifier-activating enzyme 6 OS=Homo sapiens OX=9606 GN=UBA6 PE=1 SV=1	2	3	3	3	3.3	3.3	3.3	117.97	1052	0	2.7775	2071900	3
J3QS39	UBB	Polyubiquitin-B (Fragment) OS=Homo sapiens OX=9606 GN=UBB PE=1 SV=1	24	7	7	7	52.7	52.7	52.7	10.469	93	0	35.213	150800000	9
P62837	UBE2D2	Ubiquitin-conjugating enzyme E2 D2 OS=Homo sapiens OX=9606 GN=UBE2D2 PE=1 SV=1	8	2	2	2	14.3	14.3	14.3	16.735	147	0	3.0762	5107800	2
H3BPC4	UBE2I	SUMO-conjugating enzyme UBC9 (Fragment) OS=Homo sapiens OX=9606 GN=UBE2I PE=1 SV=2	4	2	2	2	32.9	32.9	32.9	7.8891	70	0	2.8887	3221600	3
P61086	UBE2K	Ubiquitin-conjugating enzyme E2 K OS=Homo sapiens OX=9606 GN=UBE2K PE=1 SV=3	3	8	8	8	46	46	46	22.406	200	0	20.386	28709000	11
P61088	UBE2N	Ubiquitin-conjugating enzyme E2 N OS=Homo sapiens OX=9606 GN=UBE2N PE=1 SV=1	6	6	6	6	40.8	40.8	40.8	17.138	152	0	10.738	27026000	10
Q13404	UBE2V1	Ubiquitin-conjugating enzyme E2 variant 1 OS=Homo sapiens OX=9606 GN=UBE2V1 PE=1 SV=2	6	8	8	4	49	49	29.9	16.495	147	0	12.331	26729000	7
H0YDS0	UBQLN1	Ubiquilin-1 (Fragment) OS=Homo sapiens OX=9606 GN=UBQLN1 PE=1 SV=1	4	3	3	3	17.2	17.2	17.2	16.444	157	0	11.761	10688000	6
A0A087WTZ5	UBXN1	UBX domain-containing protein 1 OS=Homo sapiens OX=9606 GN=UBXN1 PE=1 SV=1	4	2	2	2	11.8	11.8	11.8	27.015	238	0	3.7838	1575200	1
A0A087WTB8	UCHL3	Ubiquitin carboxyl-terminal hydrolase OS=Homo sapiens OX=9606 GN=UCHL3 PE=1 SV=1	3	2	2	2	11.3	11.3	11.3	21.945	194	0	4.1383	4364400	2
O60701	UGDH	UDP-glucose 6-dehydrogenase OS=Homo sapiens OX=9606 GN=UGDH PE=1 SV=1	7	19	19	19	42.7	42.7	42.7	55.023	494	0	76.203	91343000	29
Q9NYU2	UGGT1	UDP-glucose:glycoprotein glucosyltransferase 1 OS=Homo sapiens OX=9606 GN=UGGT1 PE=1 SV=3	3	25	25	25	19	19	19	177.19	1555	0	60.078	59736000	25
A0A087WYS1	UGP2	UTP--glucose-1-phosphate uridylyltransferase OS=Homo sapiens OX=9606 GN=UGP2 PE=1 SV=1	10	11	11	11	28	28	28	56.967	508	0	27.615	40893000	11
P11172	UMPS	Uridine 5'-monophosphate synthase OS=Homo sapiens OX=9606 GN=UMPS PE=1 SV=1	5	11	11	11	24	24	24	52.221	480	0	20.411	29086000	12
P47985	UQCRFS1	Cytochrome b-c1 complex subunit Rieske, mitochondrial OS=Homo sapiens OX=9606 GN=UQCRFS1 PE=1 SV=2	2	3	3	3	11.3	11.3	11.3	29.668	274	0	5.7882	6698500	3
A0A494C1D8	UROD	Uroporphyrinogen decarboxylase (Fragment) OS=Homo sapiens OX=9606 GN=UROD PE=1 SV=1	13	2	2	2	26.9	26.9	26.9	10.551	93	0	2.7469	3168600	1
P54578	USP14	Ubiquitin carboxyl-terminal hydrolase 14 OS=Homo sapiens OX=9606 GN=USP14 PE=1 SV=3	4	10	10	10	25.9	25.9	25.9	56.068	494	0	17.816	19354000	12
P45974	USP5	Ubiquitin carboxyl-terminal hydrolase 5 OS=Homo sapiens OX=9606 GN=USP5 PE=1 SV=2	2	3	3	3	4.8	4.8	4.8	95.785	858	0	9.3837	6363800	2
Q9P0L0	VAPA	Vesicle-associated membrane protein-associated protein A OS=Homo sapiens OX=9606 GN=VAPA PE=1 SV=3	2	6	6	5	22.9	22.9	18.1	27.893	249	0	14.174	15825000	8
O95292	VAPB	Vesicle-associated membrane protein-associated protein B/C OS=Homo sapiens OX=9606 GN=VAPB PE=1 SV=3	2	3	2	2	16	11.1	11.1	27.228	243	0	4.5761	2402800	2
Q99536	VAT1	Synaptic vesicle membrane protein VAT-1 homolog OS=Homo sapiens OX=9606 GN=VAT1 PE=1 SV=2	8	16	16	16	53.4	53.4	53.4	41.92	393	0	44.04	124420000	23
P18206	VCL	Vinculin OS=Homo sapiens OX=9606 GN=VCL PE=1 SV=4	2	23	23	23	31.3	31.3	31.3	123.8	1134	0	51.895	67550000	29
P55072	VCP	Transitional endoplasmic reticulum ATPase OS=Homo sapiens OX=9606 GN=VCP PE=1 SV=4	3	39	39	39	57.4	57.4	57.4	89.321	806	0	128.84	237930000	51
P21796	VDAC1	Voltage-dependent anion-selective channel protein 1 OS=Homo sapiens OX=9606 GN=VDAC1 PE=1 SV=2	2	10	10	10	36.4	36.4	36.4	30.772	283	0	25.068	35311000	15
A0A0A0MR02	VDAC2	Voltage-dependent anion-selective channel protein 2 (Fragment) OS=Homo sapiens OX=9606 GN=VDAC2 PE=1 SV=1	5	7	7	7	35.5	35.5	35.5	30.348	282	0	20.105	31081000	11
Q9Y277	VDAC3	Voltage-dependent anion-selective channel protein 3 OS=Homo sapiens OX=9606 GN=VDAC3 PE=1 SV=1	6	3	3	3	12.7	12.7	12.7	30.658	283	0	5.8392	6937200	4
A0A1B0GTT5	VIM	Vimentin (Fragment) OS=Homo sapiens OX=9606 GN=VIM PE=1 SV=1	4	2	2	2	18.8	18.8	18.8	16.425	149	0	3.1083	1740900	2
Q96QK1	VPS35	Vacuolar protein sorting-associated protein 35 OS=Homo sapiens OX=9606 GN=VPS35 PE=1 SV=2	1	2	2	2	3.3	3.3	3.3	91.706	796	0	4.0142	2660900	2
P23381	WARS1	Tryptophan--tRNA ligase, cytoplasmic OS=Homo sapiens OX=9606 GN=WARS PE=1 SV=2	27	17	17	17	45.6	45.6	45.6	53.165	471	0	45.63	111800000	31
K7EIJ0	WBP2	WW domain-binding protein 2 (Fragment) OS=Homo sapiens OX=9606 GN=WBP2 PE=1 SV=1	8	2	2	2	12	12	12	18.224	167	0	3.9981	6029800	2
O75083	WDR1	WD repeat-containing protein 1 OS=Homo sapiens OX=9606 GN=WDR1 PE=1 SV=4	1	2	2	2	4.1	4.1	4.1	66.193	606	0	3.9415	5136700	4
Q5JSH3	WDR44	WD repeat-containing protein 44 OS=Homo sapiens OX=9606 GN=WDR44 PE=1 SV=1	2	5	5	5	7.8	7.8	7.8	101.37	913	0	12.354	6747700	7
Q9NQW7	XPNPEP1	Xaa-Pro aminopeptidase 1 OS=Homo sapiens OX=9606 GN=XPNPEP1 PE=1 SV=3	4	8	8	8	18.3	18.3	18.3	69.917	623	0	13.732	18993000	8
P13010	XRCC5	X-ray repair cross-complementing protein 5 OS=Homo sapiens OX=9606 GN=XRCC5 PE=1 SV=3	1	2	2	2	4.5	4.5	4.5	82.704	732	0	4.0594	1664800	2
B1AHC9	XRCC6	X-ray repair cross-complementing protein 6 OS=Homo sapiens OX=9606 GN=XRCC6 PE=1 SV=1	2	2	2	2	3.6	3.6	3.6	64.283	559	0	4.3195	2118700	2
P54577	YARS1	Tyrosine--tRNA ligase, cytoplasmic OS=Homo sapiens OX=9606 GN=YARS PE=1 SV=4	2	4	4	4	9.8	9.8	9.8	59.143	528	0	4.3656	2919800	4
P67809	YBX1	Nuclease-sensitive element-binding protein 1 OS=Homo sapiens OX=9606 GN=YBX1 PE=1 SV=3	3	5	2	2	22.5	15.1	15.1	35.924	324	0	4.9135	2361200	4
P16989	YBX3	Y-box-binding protein 3 OS=Homo sapiens OX=9606 GN=YBX3 PE=1 SV=4	2	5	5	2	10.2	10.2	3.8	40.089	372	0	13.989	2926300	5
P31946	YWHAB	14-3-3 protein beta/alpha OS=Homo sapiens OX=9606 GN=YWHAB PE=1 SV=3	5	18	13	11	62.6	53.7	47.2	28.082	246	0	76.196	16479000	7
P62258	YWHAE	14-3-3 protein epsilon OS=Homo sapiens OX=9606 GN=YWHAE PE=1 SV=1	6	23	23	21	68.2	68.2	68.2	29.174	255	0	96.669	154830000	30
P61981	YWHAG	14-3-3 protein gamma OS=Homo sapiens OX=9606 GN=YWHAG PE=1 SV=2	1	14	9	9	51.8	39.7	39.7	28.302	247	0	50.622	96809000	13
Q04917	YWHAH	14-3-3 protein eta OS=Homo sapiens OX=9606 GN=YWHAH PE=1 SV=4	4	8	5	5	30.1	23.6	23.6	28.218	246	0	19.266	17676000	7
P27348	YWHAQ	14-3-3 protein theta OS=Homo sapiens OX=9606 GN=YWHAQ PE=1 SV=1	2	23	21	19	73.5	73.5	66.9	27.764	245	0	108.81	135410000	23
P63104	YWHAZ	14-3-3 protein zeta/delta OS=Homo sapiens OX=9606 GN=YWHAZ PE=1 SV=1	10	20	17	16	69.8	66.1	63.7	27.745	245	0	151.6	192340000	24
A0A0A0MS41	SFXN3	Sidoreflexin OS=Homo sapiens OX=9606 GN=SFXN3 PE=1 SV=1	4	14	13	13	50.8	44.9	44.9	35.503	321	0	23.917	39806000	12
E9PNW4		Uncharacterized protein OS=Homo sapiens OX=9606 PE=1 SV=1	4	2	2	2	22.2	22.2	22.2	11.985	108	0	2.5373	1290000	2
K7ERW9	ASNA1	Arsenical pump-driving ATPase (Fragment) OS=Homo sapiens OX=9606 GN=ASNA1 PE=1 SV=1	3	3	3	3	23	23	23	21.872	200	0	9.2184	4132600	5
M0QZK8		Uncharacterized protein OS=Homo sapiens OX=9606 PE=4 SV=1	4	2	2	2	28.2	28.2	28.2	11.578	103	0	2.1508	1087300	2

## Sheet: HOTAIR-2
Majority protein IDs	Protein Name	Description	Number of proteins	Peptides	Razor + unique peptides	Unique peptides	Sequence coverage [%]	Unique + razor sequence coverage [%]	Unique sequence coverage [%]	Mol. weight [kDa]	Sequence length	Q-value	Score	Intensity	MS/MS count
O00151	PDLIM1	PDZ and LIM domain protein 1 OS=Homo sapiens OX=9606	1	2	2	2	9.4	9.4	9.4	36.071	329	0	15.136	6826700	2
O14737	PDCD5	Programmed cell death protein 5 OS=Homo sapiens OX=9606	5	2	2	2	16.8	16.8	16.8	14.285	125	0	14.291	1644200	1
O15173	PGRMC2	Membrane-associated progesterone receptor component 2 OS=Homo sapiens OX=9606	1	2	2	2	12.1	12.1	12.1	23.818	223	0	20.246	7628000	3
O43143	DHX15	Pre-mRNA-splicing factor ATP-dependent RNA helicase DHX15 OS=Homo sapiens OX=9606	1	2	2	2	2.9	2.9	2.9	90.932	795	0	12.573	1197900	2
O60443	GSDME	Gasdermin-E OS=Homo sapiens OX=9606	2	2	2	2	7.7	7.7	7.7	54.554	496	0	13.865	2480500	4
O60547	GMDS	GDP-mannose 4,6 dehydratase OS=Homo sapiens OX=9606	1	2	2	2	7	7	7	41.949	372	0	13.798	2857100	2
O60869	EDF1	Endothelial differentiation-related factor 1 OS=Homo sapiens OX=9606	1	2	2	2	23	23	23	16.368	148	0	16.768	4264600	3
O60870	VAPB	Vesicle-associated membrane protein-associated protein B/C OS=Homo sapiens OX=9606	2	3	2	2	11.1	11.1	11.1	27.228	243	0	13.845	5000300	2
O60871	ACSL3	Long-chain-fatty-acid--CoA ligase 3 OS=Homo sapiens OX=9606	2	2	2	2	4.6	4.6	4.6	80.419	720	0	11.861	2690700	3
O60872	DDAH2	N(G),N(G)-dimethylarginine dimethylaminohydrolase 2 OS=Homo sapiens OX=9606	1	2	2	2	10.5	10.5	10.5	29.644	285	0	14.541	2879900	3
O60873	CYB5A	Cytochrome b5 OS=Homo sapiens OX=9606	2	2	2	2	26.1	26.1	26.1	15.33	134	0	11.159	5818500	3
O60874	DHFR	Dihydrofolate reductase OS=Homo sapiens OX=9606	4	2	2	2	12.3	12.3	12.3	21.452	187	0	13.293	4427100	5
O60875	MT-CO2	Cytochrome c oxidase subunit 2 OS=Homo sapiens OX=9606	1	2	2	2	10.1	10.1	10.1	25.565	227	0	12.723	1836700	1
O60876	NRAS	GTPase NRas OS=Homo sapiens OX=9606	4	5	5	2	32.3	32.3	11.1	21.229	189	0	31.981	11442000	5
O60877	CSTB	Cystatin-B OS=Homo sapiens OX=9606	2	2	2	2	33.7	33.7	33.7	11.139	98	0	13.682	9241900	3
O60878	EIF4E	Eukaryotic translation initiation factor 4E OS=Homo sapiens OX=9606	3	2	2	2	9.7	9.7	9.7	25.097	217	0	11.756	1884400	1
O60879	DBI	Acyl-CoA-binding protein OS=Homo sapiens OX=9606	3	2	2	2	31	31	31	10.044	87	0	13.348	4854000	2
O60880	PSAP	Prosaposin OS=Homo sapiens OX=9606	4	2	2	2	4.8	4.8	4.8	58.112	524	0	10.662	1147500	1
O60881	CYC1	Cytochrome c1, heme protein, mitochondrial OS=Homo sapiens OX=9606	1	2	2	2	4	4	4	35.422	325	0	12.203	2510700	2
O60882	RPS17	40S ribosomal protein S17 OS=Homo sapiens OX=9606	5	2	2	2	16.3	16.3	16.3	15.55	135	0	13.389	9766800	4
O60883	COX6C	Cytochrome c oxidase subunit 6C OS=Homo sapiens OX=9606	1	2	2	2	17.3	17.3	17.3	8.7813	75	0	13.836	1922200	2
O60884	ALDOC	Fructose-bisphosphate aldolase C OS=Homo sapiens OX=9606	6	4	2	2	16.8	7.1	7.1	39.455	364	0	21.016	11845000	5
O60885	GAA	Lysosomal alpha-glucosidase OS=Homo sapiens OX=9606	1	2	2	2	3.2	3.2	3.2	105.32	952	0	11.207	1802100	1
O60886	H1-4	Histone H1.4 OS=Homo sapiens OX=9606	4	9	2	2	27.4	9.6	9.6	21.865	219	0	15.54	4182400	4
O60887	COX5B	Cytochrome c oxidase subunit 5B, mitochondrial OS=Homo sapiens OX=9606	1	2	2	2	24	24	24	13.696	129	0	12.619	4850100	2
O60888	RALA	Ras-related protein Ral-A OS=Homo sapiens OX=9606	5	6	6	2	27.2	27.2	15	23.567	206	0	44.409	43201000	11
O60889	RALB	Ras-related protein Ral-B OS=Homo sapiens OX=9606	3	6	2	2	27.7	15.5	15.5	23.408	206	0	15.267	4113400	2
O60890	ENO3	Beta-enolase OS=Homo sapiens OX=9606	8	6	2	2	20.7	6.2	6.2	46.986	434	0	14.52	5534000	3
O60891	MIF	Macrophage migration inhibitory factor OS=Homo sapiens OX=9606	1	2	2	2	17.4	17.4	17.4	12.476	115	0	18.564	36377000	2
O60892	AKR1B1	Aldo-keto reductase family 1 member B1 OS=Homo sapiens OX=9606	2	2	2	2	8.9	8.9	8.9	35.853	316	0	13.762	3635200	2
O60893	GLB1	Beta-galactosidase OS=Homo sapiens OX=9606	3	2	2	2	5.2	5.2	5.2	76.074	677	0	12.989	2597300	2
O60894	H1-2	Histone H1.2 OS=Homo sapiens OX=9606	1	9	9	2	28.2	28.2	9.9	21.364	213	0	62.387	31895000	11
O60895	ANXA7	Annexin A7 OS=Homo sapiens OX=9606	1	2	2	2	6.6	6.6	6.6	52.739	488	0	23.741	12294000	3
O60896	BTF3	Transcription factor BTF3 OS=Homo sapiens OX=9606	3	2	2	2	17	17	17	22.168	206	0	11.477	4886100	2
O60897	EEF1B2	Elongation factor 1-beta OS=Homo sapiens OX=9606	1	2	2	2	10.2	10.2	10.2	24.763	225	0	11.46	928150	2
O60898	MAPK1	Mitogen-activated protein kinase 1 OS=Homo sapiens OX=9606	1	2	2	2	6.9	6.9	6.9	41.389	360	0	11.114	1597100	2
O60899	MARCKS	Myristoylated alanine-rich C-kinase substrate OS=Homo sapiens OX=9606	1	2	2	2	9.3	9.3	9.3	31.554	332	0	19.44	3391400	3
O60900	GDI1	Rab GDP dissociation inhibitor alpha OS=Homo sapiens OX=9606	1	9	2	2	22.8	5.1	5.1	50.582	447	0	14.641	3629600	3
O60901	S100A11	Protein S100-A11 OS=Homo sapiens OX=9606	1	2	2	2	27.6	27.6	27.6	11.74	105	0	15.118	14676000	3
O60902	CDA	Cytidine deaminase OS=Homo sapiens OX=9606	1	2	2	2	21.9	21.9	21.9	16.185	146	0	13.081	7984500	4
O60903	ATP6V1E1	V-type proton ATPase subunit E 1 OS=Homo sapiens OX=9606	2	2	2	2	11.1	11.1	11.1	26.145	226	0	11.255	125870	1
O60904	HSPA9	Stress-70 protein, mitochondrial OS=Homo sapiens OX=9606	4	2	2	2	4.1	4.1	4.1	73.68	679	0	13.106	3947600	2
O60905	RPS27	40S ribosomal protein S27 OS=Homo sapiens OX=9606	4	2	2	2	31	31	31	9.461	84	0	13.994	4735100	1
O60906	NAMPT	Nicotinamide phosphoribosyltransferase OS=Homo sapiens OX=9606	2	2	2	2	10.2	10.2	10.2	55.52	491	0	18.163	9199100	3
O60907	RPS10	40S ribosomal protein S10 OS=Homo sapiens OX=9606	6	2	2	2	20	20	20	18.898	165	0	15.981	1842700	2
O60908	EIF1AX	Eukaryotic translation initiation factor 1A, X-chromosomal OS=Homo sapiens OX=9606	4	2	2	2	19.4	19.4	19.4	16.46	144	0	16.076	678430	2
O60909	HSPA13	Heat shock 70 kDa protein 13 OS=Homo sapiens OX=9606	1	2	2	2	4.9	4.9	4.9	51.927	471	0	10.582	1310600	1
O60910	LMAN1	Protein ERGIC-53 OS=Homo sapiens OX=9606	1	2	2	2	7.8	7.8	7.8	57.548	510	0	18.907	2351600	2
O60911	DHPS	Deoxyhypusine synthase OS=Homo sapiens OX=9606	11	2	2	2	7.9	7.9	7.9	40.97	369	0	15.484	997780	2
O60912	HINT1	Histidine triad nucleotide-binding protein 1 OS=Homo sapiens OX=9606	5	2	2	2	31.7	31.7	31.7	13.802	126	0	13.631	786580	1
O60913	CRIP1	Cysteine-rich protein 1 OS=Homo sapiens OX=9606	1	2	2	2	18.2	18.2	18.2	8.5328	77	0	12.059	1529900	2
O60914	BCAP31	B-cell receptor-associated protein 31 OS=Homo sapiens OX=9606	5	2	2	2	15	15	15	27.991	246	0	12.204	2845500	3
O60915	HNRNPA3	Heterogeneous nuclear ribonucleoprotein A3 OS=Homo sapiens OX=9606	1	2	2	2	10.1	10.1	10.1	39.594	378	0	11.373	1984200	2
O60916	SLC16A1	Monocarboxylate transporter 1 OS=Homo sapiens OX=9606	3	2	2	2	7	7	7	53.944	500	0	15.552	7194800	2
O60917	SUB1	Activated RNA polymerase II transcriptional coactivator p15 OS=Homo sapiens OX=9606	1	2	2	2	30.7	30.7	30.7	14.395	127	0	13.907	4984200	2
O60918	MTPN	Myotrophin OS=Homo sapiens OX=9606	2	2	2	2	38.1	38.1	38.1	12.895	118	0	14.15	5202100	3
O60919	RAB8A	Ras-related protein Rab-8A OS=Homo sapiens OX=9606	11	4	3	2	17.9	12.6	9.7	23.668	207	0	19.448	94496000	3
O60920	SUMO2	Small ubiquitin-related modifier 2 OS=Homo sapiens OX=9606	5	2	2	2	33.7	33.7	33.7	10.871	95	0	17.19	1321100	2
O60921	RPS23	40S ribosomal protein S23 OS=Homo sapiens OX=9606	2	2	2	2	16.1	16.1	16.1	15.807	143	0	14.748	7386400	2
O60922	SNRPD3	Small nuclear ribonucleoprotein Sm D3 OS=Homo sapiens OX=9606	1	2	2	2	15.1	15.1	15.1	13.916	126	0	13.697	1348600	1
O60923	RPS25	40S ribosomal protein S25 OS=Homo sapiens OX=9606	1	2	2	2	15.2	15.2	15.2	13.742	125	0	13.053	17140000	4
O60924	RPS28	40S ribosomal protein S28 OS=Homo sapiens OX=9606	1	2	2	2	27.5	27.5	27.5	7.8409	69	0	13.029	2775600	3
O60925	PPP2CA	Serine/threonine-protein phosphatase 2A catalytic subunit alpha isoform OS=Homo sapiens OX=9606	4	2	2	2	8.4	8.4	8.4	35.594	309	0	14.257	4354700	2
O60926	UBE2L3	Ubiquitin-conjugating enzyme E2 L3 OS=Homo sapiens OX=9606	2	2	2	2	15.6	15.6	15.6	17.861	154	0	10.973	3853700	1
O60927	RAE1	mRNA export factor OS=Homo sapiens OX=9606	3	2	2	2	6.8	6.8	6.8	40.968	368	0	11.844	1430900	2
O60928	SARNP	SAP domain-containing ribonucleoprotein OS=Homo sapiens OX=9606	3	2	2	2	13.8	13.8	13.8	23.671	210	0	15.182	1497900	2
O60929	CDK6	Cyclin-dependent kinase 6 OS=Homo sapiens OX=9606	1	3	2	2	11.3	8.9	8.9	36.938	326	0	13.999	7175900	2
O60930	REEP5	Receptor expression-enhancing protein 5 OS=Homo sapiens OX=9606	2	2	2	2	10.1	10.1	10.1	21.493	189	0	13.758	2392800	2
O60931	SPTBN1	Spectrin beta chain, non-erythrocytic 1 OS=Homo sapiens OX=9606	2	2	2	2	1.4	1.4	1.4	274.61	2364	0	12.714	1319200	2
O60932	ARHGAP1	Rho GTPase-activating protein 1 OS=Homo sapiens OX=9606	2	2	2	2	5	5	5	50.435	439	0	13.406	4873100	2
O60933	PPID	Peptidyl-prolyl cis-trans isomerase D OS=Homo sapiens OX=9606	1	2	2	2	6.8	6.8	6.8	40.763	370	0	15.547	1333400	2
O60934	RBBP4	Histone-binding protein RBBP4 OS=Homo sapiens OX=9606	10	5	2	2	15.8	10.1	10.1	47.655	425	0	13.755	5213000	2
O60935	SCRN1	Secernin-1 OS=Homo sapiens OX=9606	1	2	2	2	6.5	6.5	6.5	46.382	414	0	14.55	4188000	4
O60936	IDI1	Isopentenyl-diphosphate Delta-isomerase 1 OS=Homo sapiens OX=9606	1	2	2	2	5.7	5.7	5.7	26.319	227	0	12.849	2466800	4
O60937	EIF2B1	Translation initiation factor eIF-2B subunit alpha OS=Homo sapiens OX=9606	3	2	2	2	7.2	7.2	7.2	33.712	305	0	13.911	2894600	3
O60938	GALE	UDP-glucose 4-epimerase OS=Homo sapiens OX=9606	5	2	2	2	6	6	6	38.281	348	0	13.327	1421900	1
O60939	PSMD6	26S proteasome non-ATPase regulatory subunit 6 OS=Homo sapiens OX=9606	3	2	2	2	6.2	6.2	6.2	45.531	389	0	11.741	1548800	1
O60940	PMVK	Phosphomevalonate kinase OS=Homo sapiens OX=9606	2	2	2	2	11.5	11.5	11.5	21.995	192	0	10.767	2829800	2
O60941	ATP6AP1	V-type proton ATPase subunit S1 OS=Homo sapiens OX=9606	4	2	2	2	4.3	4.3	4.3	52.025	470	0	11.863	2090700	1
O60942	PDCD4	Programmed cell death protein 4 OS=Homo sapiens OX=9606	2	2	2	2	6	6	6	51.735	469	0	13.933	2793900	2
O60943	ACTBL2	Beta-actin-like protein 2 OS=Homo sapiens OX=9606	1	13	2	2	27.1	10.6	10.6	42.003	376	0	11.349	17017000	2
O60944	HSP90AB2P	Putative heat shock protein HSP 90-beta 2 OS=Homo sapiens OX=9606	1	15	2	2	23.9	4.5	4.5	44.348	381	0	18.976	72204000	9
O60945	CAVIN1	Caveolae-associated protein 1 OS=Homo sapiens OX=9606	1	2	2	2	6.2	6.2	6.2	43.476	390	0	14.536	4310900	2
O60946	AGTRAP	Type-1 angiotensin II receptor-associated protein OS=Homo sapiens OX=9606	1	2	2	2	24.5	24.5	24.5	17.419	159	0	14.815	1303800	2
O60947	AEBP2	Zinc finger protein AEBP2 OS=Homo sapiens OX=9606	1	2	2	2	1.7	1.7	1.7	54.466	517	0	11.347	44225000	2
O60948	UBE2R2	Ubiquitin-conjugating enzyme E2 R2 OS=Homo sapiens OX=9606	1	2	2	2	11.8	11.8	11.8	27.166	238	0	13.398	4258900	2
O60949	SND1	Staphylococcal nuclease domain-containing protein 1 OS=Homo sapiens OX=9606	1	2	2	2	3.2	3.2	3.2	102	910	0	15.173	2571000	2
O60950	POGLUT3	Protein O-glucosyltransferase 3 OS=Homo sapiens OX=9606	2	2	2	2	4.7	4.7	4.7	58.572	507	0	14.675	2420700	2
O60951	CMC1	COX assembly mitochondrial protein homolog OS=Homo sapiens OX=9606	1	2	2	2	18.9	18.9	18.9	12.49	106	0	11.245	1545600	2
O60952	FAM114A1	Protein NOXP20 OS=Homo sapiens OX=9606	1	2	2	2	4.8	4.8	4.8	60.741	563	0	12.876	1145100	3
O60953	PCSK9	Proprotein convertase subtilisin/kexin type 9 OS=Homo sapiens OX=9606	1	2	2	2	5.1	5.1	5.1	74.285	692	0	15.655	5495600	4
O60954	FBXO22	F-box only protein 22 OS=Homo sapiens OX=9606	4	2	2	2	6	6	6	44.508	403	0	14.005	2071900	1
O60955	SETD7	Histone-lysine N-methyltransferase SETD7 OS=Homo sapiens OX=9606	2	2	2	2	6.3	6.3	6.3	40.72	366	0	10.775	2576800	2
O60956	H2AC6	Histone H2A type 1-C OS=Homo sapiens OX=9606	11	6	6	2	35.4	35.4	13.8	14.105	130	0	49.191	21140000	4
O60957	RPE	Ribulose-phosphate 3-epimerase OS=Homo sapiens OX=9606	6	2	2	2	11.4	11.4	11.4	24.927	228	0	13.741	4653700	2
O60958	FAF2	FAS-associated factor 2 OS=Homo sapiens OX=9606	1	2	2	2	8.3	8.3	8.3	52.623	445	0	13.379	1662000	1
O60959	HPDL	4-hydroxyphenylpyruvate dioxygenase-like protein OS=Homo sapiens OX=9606	1	2	2	2	8.9	8.9	8.9	39.385	371	0	13.202	1636800	1
O60960	TMX3	Protein disulfide-isomerase TMX3 OS=Homo sapiens OX=9606	1	2	2	2	4.2	4.2	4.2	51.871	454	0	13.41	4501400	2
O60961	PRRC1	Protein PRRC1 OS=Homo sapiens OX=9606	1	2	2	2	6.3	6.3	6.3	46.701	445	0	13.668	2880200	1
O60962	VPS35	Vacuolar protein sorting-associated protein 35 OS=Homo sapiens OX=9606	1	2	2	2	3.3	3.3	3.3	91.706	796	0	12.17	0	2
O60963	TTC1	Tetratricopeptide repeat protein 1 OS=Homo sapiens OX=9606	2	2	2	2	7.2	7.2	7.2	33.526	292	0	11.882	2956600	2
O60964	MRI1	Methylthioribose-1-phosphate isomerase OS=Homo sapiens OX=9606	1	2	2	2	6	6	6	39.149	369	0	10.974	5673700	1
O60965	NTMT1	N-terminal Xaa-Pro-Lys N-methyltransferase 1 OS=Homo sapiens OX=9606	3	2	2	2	13.5	13.5	13.5	25.387	223	0	13.42	1224600	2
O60966	DCTPP1	dCTP pyrophosphatase 1 OS=Homo sapiens OX=9606	1	2	2	2	20.6	20.6	20.6	18.681	170	0	15.364	1727700	2
O60967	NANS	Sialic acid synthase OS=Homo sapiens OX=9606	3	2	2	2	7.8	7.8	7.8	40.307	359	0	18.094	1787700	2
O60968	CYRIB	CYFIP-related Rac1 interactor B OS=Homo sapiens OX=9606	3	2	2	2	11.7	11.7	11.7	36.748	324	0	12.391	2094000	2
O60969	CNTLN	Centlein OS=Homo sapiens OX=9606	1	2	2	2	1.1	1.1	1.1	161.57	1405	0	11.442	392450	1
O60970	CISD1	CDGSH iron-sulfur domain-containing protein 1 OS=Homo sapiens OX=9606	1	2	2	2	22.2	22.2	22.2	12.199	108	0	15.475	888900	1
O60971	BCCIP	BRCA2 and CDKN1A-interacting protein OS=Homo sapiens OX=9606	1	2	2	2	7.6	7.6	7.6	35.979	314	0	12.23	1445800	3
O60972	PTGFRN	Prostaglandin F2 receptor negative regulator OS=Homo sapiens OX=9606	1	2	2	2	3.4	3.4	3.4	98.555	879	0	14.402	2013900	2
O60973	GNG12	Guanine nucleotide-binding protein G(I)/G(S)/G(O) subunit gamma-12 OS=Homo sapiens OX=9606	1	2	2	2	45.8	45.8	45.8	8.0061	72	0	12.559	3940600	2
O60974	CTSZ	Cathepsin Z OS=Homo sapiens OX=9606	1	2	2	2	7.3	7.3	7.3	33.868	303	0	12.359	5347500	2
O60975	PFDN2	Prefoldin subunit 2 OS=Homo sapiens OX=9606	1	2	2	2	16.9	16.9	16.9	16.648	154	0	14.912	4228900	2
O60976	RAB21	Ras-related protein Rab-21 OS=Homo sapiens OX=9606	1	2	2	2	12	12	12	24.347	225	0	14.981	1971600	2
O60977	TMED5	Transmembrane emp24 domain-containing protein 5 OS=Homo sapiens OX=9606	3	2	2	2	13.1	13.1	13.1	26.005	229	0	10.802	4545600	2
O60978	PPME1	Protein phosphatase methylesterase 1 OS=Homo sapiens OX=9606	1	2	2	2	8.3	8.3	8.3	42.315	386	0	13.314	2002000	5
O60979	#N/A	#N/A	7	2	2	2	1	1	1	254.07	2240	0	10.916	3399900	1
O60980	EIF3H	Eukaryotic translation initiation factor 3 subunit H OS=Homo sapiens OX=9606	4	2	2	2	8.6	8.6	8.6	39.589	349	0	10.771	2071900	1
O60981	OGFR	Opioid growth factor receptor OS=Homo sapiens OX=9606	3	2	2	2	7.7	7.7	7.7	44.756	390	0	11.509	2480300	1
O60982	HM13	Minor histocompatibility antigen H13 OS=Homo sapiens OX=9606	6	2	2	2	9.8	9.8	9.8	15.432	143	0	12.928	2426500	2
O60983	CSNK2A1	Casein kinase II subunit alpha (Fragment) OS=Homo sapiens OX=9606	20	2	2	2	10.1	10.1	10.1	24.537	207	0	11.064	772590	1
O60984	GPX1	Glutathione peroxidase 1 OS=Homo sapiens OX=9606	3	2	2	2	19.1	19.1	19.1	16.914	157	0	15.086	3958100	4
O60985	TPM4	Tropomyosin alpha-4 chain OS=Homo sapiens OX=9606	30	8	2	2	41.5	14.2	14.2	20.985	183	0	13.953	1377900	2
O60986	IMPDH1	Inosine-5'-monophosphate dehydrogenase (Fragment) OS=Homo sapiens OX=9606	3	3	2	2	9.2	7.7	7.7	54.272	509	0	11.132	2023100	0
O60987	IDE	Insulin-degrading enzyme OS=Homo sapiens OX=9606	2	2	2	2	1.8	1.8	1.8	117.94	1019	0	10.867	722050	1
O60988	ATP5PO	ATP synthase subunit O, mitochondrial OS=Homo sapiens OX=9606	4	2	2	2	14.2	14.2	14.2	16.89	155	0	12.152	3494100	2
O60989	STMN1	Stathmin (Fragment) OS=Homo sapiens OX=9606	2	2	2	2	30.6	30.6	30.6	9.7931	85	0	17.067	1736400	3
O60990	PTPA	Serine/threonine-protein phosphatase 2A activator (Fragment) OS=Homo sapiens OX=9606	11	2	2	2	13.6	13.6	13.6	19.319	176	0	12.418	1981200	2
O60991	TSPO	Peripheral-type benzodiazepine receptor (Fragment) OS=Homo sapiens OX=9606	2	2	2	2	29	29	29	11.896	107	0	16.718	3166700	2
O60992	PRPS1	Ribose-phosphate pyrophosphokinase 1 OS=Homo sapiens OX=9606	10	2	2	2	7.7	7.7	7.7	31.392	285	0	14.075	2319100	1
O60993	PABPC4	Polyadenylate-binding protein OS=Homo sapiens OX=9606	7	8	3	2	15	5.9	4.4	67.97	615	0	16.514	3264100	2
O60994	CARS1	Cysteinyl-tRNA synthetase OS=Homo sapiens OX=9606	2	2	2	2	3.1	3.1	3.1	84.277	739	0	13.843	881690	2
O60995	ARL1	ADP-ribosylation factor-like protein 1 OS=Homo sapiens OX=9606	4	2	2	2	22.2	22.2	22.2	15.443	135	0	17.829	807280	2
O60996	CAP2	Adenylyl cyclase-associated protein OS=Homo sapiens OX=9606	5	3	2	2	5.2	3	3	39.911	365	0	11.148	829970	2
O60997	SCARB1	SCARB1 protein OS=Homo sapiens OX=9606	4	2	2	2	4.2	4.2	4.2	53.847	481	0	13.085	0	2
O60998	EHD1	EH domain-containing protein 1 (Fragment) OS=Homo sapiens OX=9606	7	2	2	2	13.8	13.8	13.8	16.572	145	0	12.763	350240	2
O60999	POLR2H	DNA-directed RNA polymerases I, II, and III subunit RPABC3 (Fragment) OS=Homo sapiens OX=9606	2	2	2	2	21.6	21.6	21.6	16.925	148	0	18.661	790430	1
O61000	SSBP1	Single-stranded DNA-binding protein, mitochondrial (Fragment) OS=Homo sapiens OX=9606	4	2	2	2	19.8	19.8	19.8	14.131	121	0	13.644	2455600	2
O61001	ETF1	Eukaryotic peptide chain release factor subunit 1 OS=Homo sapiens OX=9606	5	2	2	2	29.5	29.5	29.5	10.482	95	0	14.597	3125300	2
O61002	PGM3	Phosphoacetylglucosamine mutase OS=Homo sapiens OX=9606	9	2	2	2	22.5	22.5	22.5	7.756	71	0	11.298	533570	1
O61003	PAIP1	Polyadenylate-binding protein-interacting protein 1 OS=Homo sapiens OX=9606	3	3	3	2	12.5	12.5	7.1	39.908	351	0	22.376	3177100	4
O61004	PBK	Lymphokine-activated killer T-cell-originated protein kinase (Fragment) OS=Homo sapiens OX=9606	2	2	2	2	13.2	13.2	13.2	17.075	151	0	13.036	2887700	2
O61005	PFDN1	Prefoldin subunit 1 OS=Homo sapiens OX=9606	3	2	2	2	17.1	17.1	17.1	13.466	117	0	11.022	3151600	1
O61006	TBCA	Tubulin-specific chaperone A OS=Homo sapiens OX=9606	4	2	2	2	34.5	34.5	34.5	10.08	84	0	38.622	24918000	3
O61007	MAT2B	Methionine adenosyltransferase 2 subunit beta OS=Homo sapiens OX=9606	2	2	2	2	20.5	20.5	20.5	13.541	117	0	14.005	4887300	3
O61008	COPS6	COP9 signalosome complex subunit 6 OS=Homo sapiens OX=9606	3	2	2	2	12	12	12	36.064	326	0	12.627	2607500	3
O61009	TMED2	Transmembrane emp24 domain-containing protein 2 (Fragment) OS=Homo sapiens OX=9606	3	2	2	2	12.7	12.7	12.7	18.488	166	0	14.612	1394100	1
O61010	ATP2B1	Calcium-transporting ATPase OS=Homo sapiens OX=9606	7	2	2	2	2.6	2.6	2.6	106.86	963	0	12.693	2037000	2
O61011	PUS7	Pseudouridylate synthase 7 homolog OS=Homo sapiens OX=9606	2	2	2	2	6	6	6	50.552	448	0	11.583	2344000	1
O61012	RBBP7	Histone-binding protein RBBP7 OS=Homo sapiens OX=9606	3	5	5	2	15.4	15.4	9.6	46.938	416	0	44.045	14222000	6
O61013	BZW2	BZW2 protein OS=Homo sapiens OX=9606	7	2	2	2	8.5	8.5	8.5	21.511	189	0	12.163	1600000	2
O61014	AGK	Acylglycerol kinase, mitochondrial OS=Homo sapiens OX=9606	10	2	2	2	10.2	10.2	10.2	26.925	244	0	10.966	1581800	2
O61015	PACSIN3	Protein kinase C and casein kinase substrate in neurons protein 3 OS=Homo sapiens OX=9606	5	2	2	2	7.5	7.5	7.5	37.213	320	0	14.156	5666000	3
O61016	GFUS	GDP-4-keto-6-deoxy-D-mannose-3,5-epimerase-4-reductase (Fragment) OS=Homo sapiens OX=9606	5	2	2	2	12.3	12.3	12.3	29.666	268	0	20.62	3704700	2
O61017	RRM1	Ribonucleoside-diphosphate reductase large subunit OS=Homo sapiens OX=9606	2	2	2	2	4.6	4.6	4.6	64.836	570	0	11.325	1089700	0
O61018	ANP32E	Acidic leucine-rich nuclear phosphoprotein 32 family member E (Fragment) OS=Homo sapiens OX=9606	4	2	2	2	23.7	23.7	23.7	13.128	114	0	14.836	3754000	2
O61019	SLC43A3	Solute carrier family 43 member 3 (Fragment) OS=Homo sapiens OX=9606	3	2	2	2	6.6	6.6	6.6	36.797	331	0	14.408	1783500	2
O61020	#N/A	PNP_UDP_1 domain-containing protein OS=Homo sapiens OX=9606 PE=3 SV=1	5	2	2	2	26.6	26.6	26.6	15.645	143	0	13.093	7397300	2
O61021	ADA	Adenosine deaminase OS=Homo sapiens OX=9606	4	2	2	2	17.5	17.5	17.5	29.328	263	0	14.025	4704200	2
O61022	LIMA1	LIM domain and actin-binding protein 1 OS=Homo sapiens OX=9606	3	2	2	2	6.1	6.1	6.1	51.09	456	0	12.172	1906900	1
O61023	EIF4B	Eukaryotic translation initiation factor 4B (Fragment) OS=Homo sapiens OX=9606	8	2	2	2	11.4	11.4	11.4	41.454	360	0	13.311	3931900	3
O61024	CDK4	Cyclin-dependent kinase 4 (Fragment) OS=Homo sapiens OX=9606	10	3	2	2	21.2	16.5	16.5	18.685	170	0	14.56	2929600	2
O61025	PCBP2	Poly(rC)-binding protein 2 (Fragment) OS=Homo sapiens OX=9606	10	5	2	2	45.6	17.1	17.1	16.637	158	0	15.227	0	1
O61026	ATP6V1D	V-type proton ATPase subunit D OS=Homo sapiens OX=9606	8	2	2	2	15.6	15.6	15.6	19.906	179	0	13.437	1241300	1
O61027	AMPD2	AMP deaminase OS=Homo sapiens OX=9606	2	2	2	2	2.3	2.3	2.3	98.401	861	0	12.906	391320	1
O61028	TGFBI	Transforming growth factor-beta-induced protein ig-h3 (Fragment) OS=Homo sapiens OX=9606	4	2	2	2	6	6	6	39.793	366	0	12.028	0	0
O61029	MATR3	Matrin-3 (Fragment) OS=Homo sapiens OX=9606	13	2	2	2	8.4	8.4	8.4	37.675	334	0	14.326	1929600	2
O61030	RNH1	Ribonuclease inhibitor (Fragment) OS=Homo sapiens OX=9606	2	2	2	2	11.6	11.6	11.6	30.45	285	0	12.631	3766000	2
O61031	RCN2	Reticulocalbin-2 (Fragment) OS=Homo sapiens OX=9606	2	2	2	2	26.5	26.5	26.5	17.609	155	0	13.245	2526300	1
O61032	JPT2	Jupiter microtubule-associated homolog 2 (Fragment) OS=Homo sapiens OX=9606	6	2	2	2	24.3	24.3	24.3	12.23	115	0	14.267	3644000	2
O61033	IST1	IST1 homolog (Fragment) OS=Homo sapiens OX=9606	8	2	2	2	9.7	9.7	9.7	23.375	206	0	12.529	441470	2
O61034	MVD	Diphosphomevalonate decarboxylase (Fragment) OS=Homo sapiens OX=9606	2	2	2	2	8.5	8.5	8.5	29.378	271	0	15.019	9275000	2
O61035	UBE2I	SUMO-conjugating enzyme UBC9 (Fragment) OS=Homo sapiens OX=9606	4	2	2	2	37.1	37.1	37.1	7.8891	70	0	14.392	9686600	3
O61036	PFDN5	Prefoldin subunit 5 (Fragment) OS=Homo sapiens OX=9606	3	2	2	2	17.1	17.1	17.1	17.047	152	0	14.08	3714800	2
O61037	RBMX	RNA-binding motif protein, X chromosome OS=Homo sapiens OX=9606	8	2	2	2	26.9	26.9	26.9	8.6098	78	0	13.017	1944300	1
O61038	GSPT1	Eukaryotic peptide chain release factor GTP-binding subunit ERF3A (Fragment) OS=Homo sapiens OX=9606	3	2	2	2	3.8	3.8	3.8	52.832	475	0	13.678	4508400	2
O61039	TXNDC17	Thioredoxin domain-containing protein 17 OS=Homo sapiens OX=9606	3	2	2	2	32	32	32	8.3713	75	0	14.603	952050	2
O61040	PRSS21	Testisin (Fragment) OS=Homo sapiens OX=9606	3	2	2	2	10.1	10.1	10.1	24.706	218	0	12.298	2583600	2
O61041	FLYWCH2	FLYWCH family member 2 (Fragment) OS=Homo sapiens OX=9606	3	2	2	2	33	33	33	9.56	91	0	11.978	967510	2
O61042	JPT1	Jupiter microtubule-associated homolog 1 OS=Homo sapiens OX=9606	3	2	2	2	38.5	38.5	38.5	11.012	104	0	10.885	2293500	1
O61043	SNRPN	Small nuclear ribonucleoprotein-associated protein N (Fragment) OS=Homo sapiens OX=9606	5	2	2	2	9.5	9.5	9.5	17.546	169	0	12.53	3101000	3
O61044	SNRPD1	Small nuclear ribonucleoprotein Sm D1 OS=Homo sapiens OX=9606	2	2	2	2	44	44	44	8.3926	75	0	15.917	2121200	2
O61045	PNPO	Pyridoxal 5'-phosphate synthase (Fragment) OS=Homo sapiens OX=9606	4	2	2	2	18.2	18.2	18.2	19.085	165	0	14.929	3045000	1
O61046	NCLN	Nicalin (Fragment) OS=Homo sapiens OX=9606	6	2	2	2	12.4	12.4	12.4	32.457	282	0	12.965	2705700	2
O61047	VAMP2	Vesicle-associated membrane protein 2 OS=Homo sapiens OX=9606	9	2	2	2	48.5	48.5	48.5	7.7752	68	0	10.803	1905900	2
O61048	COPE	Coatomer subunit epsilon OS=Homo sapiens OX=9606	3	2	2	2	22.6	22.6	22.6	16.453	146	0	11.534	1014900	1
O61049	TIMM50	Mitochondrial import inner membrane translocase subunit TIM50 (Fragment) OS=Homo sapiens OX=9606	3	2	2	2	24	24	24	11.866	104	0	11.86	3346600	2
O61050	SNRPA	U1 small nuclear ribonucleoprotein A (Fragment) OS=Homo sapiens OX=9606	7	2	2	2	22.5	22.5	22.5	15.945	142	0	11.891	4481000	2
O61051	RPN2	Dolichyl-diphosphooligosaccharide--protein glycosyltransferase subunit 2 (Fragment) OS=Homo sapiens OX=9606	3	2	2	2	24.1	24.1	24.1	18.17	166	0	17.582	2231200	2
O61052	CMPK1	Nucleoside-diphosphate kinase OS=Homo sapiens OX=9606	3	2	2	2	14.2	14.2	14.2	18.979	169	0	13.191	3138900	4
O61053	SURF4	Surfeit locus protein 4 OS=Homo sapiens OX=9606	3	2	2	2	15.1	15.1	15.1	21.127	186	0	37.833	4426800	1
O61054	RAB18	Ras-related protein Rab-18 OS=Homo sapiens OX=9606	4	2	2	2	17.4	17.4	17.4	18.023	161	0	13.573	4198400	2
O61055	RPS21	40S ribosomal protein S21 OS=Homo sapiens OX=9606	3	2	2	2	34.6	34.6	34.6	8.85	81	0	20.201	4702900	2
O61056	FABP3	Fatty acid-binding protein, heart (Fragment) OS=Homo sapiens OX=9606	3	2	2	2	14.4	14.4	14.4	14.787	132	0	13.551	1509000	2
O61057	HDDC2	5'-deoxynucleotidase HDDC2 OS=Homo sapiens OX=9606	3	2	2	2	19.6	19.6	19.6	12.276	107	0	13.624	2943100	2
O61058	CDC123	Cell division cycle protein 123 homolog OS=Homo sapiens OX=9606	4	2	2	2	5.4	5.4	5.4	33.891	295	0	11.822	1175800	2
O61059	ACOT7	Cytosolic acyl coenzyme A thioester hydrolase OS=Homo sapiens OX=9606	2	3	3	3	13.9	13.9	13.9	41.796	380	0	18.376	2413500	3
O61060	PSMD12	26S proteasome non-ATPase regulatory subunit 12 OS=Homo sapiens OX=9606	1	3	3	3	6.8	6.8	6.8	52.904	456	0	20.045	3297300	3
O61061	EIF3F	Eukaryotic translation initiation factor 3 subunit F OS=Homo sapiens OX=9606	2	3	3	3	13.4	13.4	13.4	37.563	357	0	23.195	3104800	3
O61062	PIR	Pirin OS=Homo sapiens OX=9606	1	3	3	3	16.9	16.9	16.9	32.113	290	0	17.208	3015200	2
O61063	PLXNB2	Plexin-B2 OS=Homo sapiens OX=9606	2	3	3	3	2	2	2	205.12	1838	0	16.09	1394600	3
O61064	TXNL1	Thioredoxin-like protein 1 OS=Homo sapiens OX=9606	5	3	3	3	15.2	15.2	15.2	32.251	289	0	20.945	7512800	4
O61065	DNPH1	2'-deoxynucleoside 5'-phosphate N-hydrolase 1 OS=Homo sapiens OX=9606	2	3	3	3	22.4	22.4	22.4	19.108	174	0	30.698	16691000	5
O61066	TRAPPC3	Trafficking protein particle complex subunit 3 OS=Homo sapiens OX=9606	4	3	3	3	15	15	15	20.274	180	0	18.511	5032200	3
O61067	SGTA	Small glutamine-rich tetratricopeptide repeat-containing protein alpha OS=Homo sapiens OX=9606	2	3	3	3	11.2	11.2	11.2	34.063	313	0	20.984	5285900	4
O61068	OGA	Protein O-GlcNAcase OS=Homo sapiens OX=9606	2	3	3	3	2.9	2.9	2.9	102.91	916	0	16.278	1247300	3
O61069	SNX2	Sorting nexin-2 OS=Homo sapiens OX=9606	2	3	3	3	7.1	7.1	7.1	58.47	519	0	19.288	2200300	3
O61070	EIF3J	Eukaryotic translation initiation factor 3 subunit J OS=Homo sapiens OX=9606	3	3	3	3	12.8	12.8	12.8	29.062	258	0	23.804	7802200	5
O61071	HSPA4L	Heat shock 70 kDa protein 4L OS=Homo sapiens OX=9606	3	7	3	3	9.7	5	5	94.511	839	0	19.393	3441100	3
O61072	TXNDC12	Thioredoxin domain-containing protein 12 OS=Homo sapiens OX=9606	3	3	3	3	22.7	22.7	22.7	19.206	172	0	21.025	4664000	2
O61073	TOMM40	Mitochondrial import receptor subunit TOM40 homolog OS=Homo sapiens OX=9606	3	3	3	3	11.6	11.6	11.6	37.893	361	0	21.443	8275700	2
O61074	KRT14	Keratin, type I cytoskeletal 14 OS=Homo sapiens OX=9606	25	10	6	3	19.9	14.6	8.1	51.561	472	0	38.796	6823700	5
O61075	CAT	Catalase OS=Homo sapiens OX=9606	1	3	3	3	10.1	10.1	10.1	59.755	527	0	20.468	3156200	4
O61076	TYMS	Thymidylate synthase OS=Homo sapiens OX=9606	1	3	3	3	16.6	16.6	16.6	35.716	313	0	16.429	970960	1
O61077	RPN1	Dolichyl-diphosphooligosaccharide--protein glycosyltransferase subunit 1 OS=Homo sapiens OX=9606	3	3	3	3	6.6	6.6	6.6	68.569	607	0	20.383	3232200	1
O61078	GNAI2	Guanine nucleotide-binding protein G(i) subunit alpha-2 OS=Homo sapiens OX=9606	4	7	3	3	26.2	13.5	13.5	40.45	355	0	20.059	6794500	4
O61079	ATP1B1	Sodium/potassium-transporting ATPase subunit beta-1 OS=Homo sapiens OX=9606	2	3	3	3	13.9	13.9	13.9	35.061	303	0	20.871	7371500	4
O61080	ITGA5	Integrin alpha-5 OS=Homo sapiens OX=9606	1	3	3	3	5.6	5.6	5.6	114.54	1049	0	26.35	8398100	4
O61081	GNAI3	Guanine nucleotide-binding protein G(i) subunit alpha OS=Homo sapiens OX=9606	1	7	7	3	22.6	22.6	9.9	40.532	354	0	45.269	17508000	7
O61082	PARP1	Poly [ADP-ribose] polymerase 1 OS=Homo sapiens OX=9606	3	3	3	3	3.4	3.4	3.4	113.08	1014	0	19.095	1934600	3
O61083	ALPI	Intestinal-type alkaline phosphatase OS=Homo sapiens OX=9606	1	7	3	3	16.9	8.5	8.5	56.811	528	0	21.562	14417000	4
O61084	SLC2A1	Solute carrier family 2, facilitated glucose transporter member 1 OS=Homo sapiens OX=9606	3	3	3	3	6.7	6.7	6.7	54.083	492	0	22.515	6297200	3
O61085	ADH5	Alcohol dehydrogenase class-3 OS=Homo sapiens OX=9606	5	3	3	3	14.4	14.4	14.4	39.724	374	0	18.502	2346600	3
O61086	COX4I1	Cytochrome c oxidase subunit 4 isoform 1, mitochondrial OS=Homo sapiens OX=9606	6	3	3	3	19.5	19.5	19.5	19.576	169	0	18.418	6723800	2
O61087	AKR1A1	Aldo-keto reductase family 1 member A1 OS=Homo sapiens OX=9606	4	3	3	3	15.1	15.1	15.1	36.573	325	0	19.506	4917100	2
O61088	RPL35A	60S ribosomal protein L35a OS=Homo sapiens OX=9606	4	3	3	3	22.7	22.7	22.7	12.538	110	0	19.406	6968400	3
O61089	RAB6A	Ras-related protein Rab-6A OS=Homo sapiens OX=9606	7	4	4	3	24.5	24.5	19.2	23.593	208	0	31.057	30479000	6
O61090	ATP6V1B2	V-type proton ATPase subunit B, brain isoform OS=Homo sapiens OX=9606	5	3	3	3	8	8	8	56.5	511	0	21.868	2453100	2
O61091	COMT	Catechol O-methyltransferase OS=Homo sapiens OX=9606	5	3	3	3	18.5	18.5	18.5	30.037	271	0	21.676	8902800	4
O61092	GRN	Progranulin OS=Homo sapiens OX=9606	5	3	3	3	7.1	7.1	7.1	63.544	593	0	19.942	2496400	2
O61093	RPL12	60S ribosomal protein L12 OS=Homo sapiens OX=9606	1	3	3	3	24.2	24.2	24.2	17.818	165	0	29.654	5435600	1
O61094	FUS	RNA-binding protein FUS OS=Homo sapiens OX=9606	4	3	3	3	6.1	6.1	6.1	53.425	526	0	17.246	2652500	3
O61095	ARL3	ADP-ribosylation factor-like protein 3 OS=Homo sapiens OX=9606	1	3	3	3	20.9	20.9	20.9	20.455	182	0	18.572	4495000	3
O61096	NUDT1	7,8-dihydro-8-oxoguanine triphosphatase OS=Homo sapiens OX=9606	1	3	3	3	20.3	20.3	20.3	22.519	197	0	22.269	13850000	3
O61097	RPL3	60S ribosomal protein L3 OS=Homo sapiens OX=9606	6	3	3	3	8.2	8.2	8.2	46.108	403	0	23.202	14183000	5
O61098	GPD2	Glycerol-3-phosphate dehydrogenase, mitochondrial OS=Homo sapiens OX=9606	2	3	3	3	5	5	5	80.852	727	0	19.94	2682900	4
O61099	RPL29	60S ribosomal protein L29 OS=Homo sapiens OX=9606	2	3	3	3	22.6	22.6	22.6	17.752	159	0	17.876	3990400	3
O61100	ME1	NADP-dependent malic enzyme OS=Homo sapiens OX=9606	1	3	3	3	7.5	7.5	7.5	64.149	572	0	19.753	3219700	2
O61101	RPL34	60S ribosomal protein L34 OS=Homo sapiens OX=9606	1	3	3	3	13.7	13.7	13.7	13.293	117	0	17.491	11135000	4
O61102	SARS1	Serine--tRNA ligase, cytoplasmic OS=Homo sapiens OX=9606	2	3	3	3	8.8	8.8	8.8	58.777	514	0	18.575	7162500	4
O61103	ANXA11	Annexin A11 OS=Homo sapiens OX=9606	2	3	3	3	9.5	9.5	9.5	54.389	505	0	18.128	3105900	3
O61104	RAB9A	Ras-related protein Rab-9A OS=Homo sapiens OX=9606	3	3	3	3	19.9	19.9	19.9	22.837	201	0	21.824	7175700	3
O61105	PGD	6-phosphogluconate dehydrogenase, decarboxylating OS=Homo sapiens OX=9606	4	3	3	3	9.5	9.5	9.5	53.139	483	0	19.508	3643400	3
O61106	HNRNPF	Heterogeneous nuclear ribonucleoprotein F OS=Homo sapiens OX=9606	2	3	3	3	11.3	11.3	11.3	45.671	415	0	17.883	3845600	3
O61107	SLC25A1	Tricarboxylate transport protein, mitochondrial OS=Homo sapiens OX=9606	2	3	3	3	10.3	10.3	10.3	34.012	311	0	17.871	1896200	3
O61108	PSMD4	26S proteasome non-ATPase regulatory subunit 4 OS=Homo sapiens OX=9606	5	3	3	3	11.9	11.9	11.9	40.736	377	0	22.575	15969000	5
O61109	EIF3B	Eukaryotic translation initiation factor 3 subunit B OS=Homo sapiens OX=9606	2	3	3	3	4.5	4.5	4.5	92.48	814	0	20.505	3526700	3
O61110	S100A10	Protein S100-A10 OS=Homo sapiens OX=9606	1	3	3	3	32	32	32	11.203	97	0	18.618	7667700	4
O61111	PCBD1	Pterin-4-alpha-carbinolamine dehydratase OS=Homo sapiens OX=9606	1	3	3	3	29.8	29.8	29.8	11.999	104	0	16.914	7693000	2
O61112	RHOA	Transforming protein RhoA OS=Homo sapiens OX=9606	5	5	5	3	29	29	21.2	21.768	193	0	34.164	25600000	6
O61113	HSPE1	10 kDa heat shock protein, mitochondrial OS=Homo sapiens OX=9606	4	3	3	3	32.4	32.4	32.4	10.932	102	0	18.627	7117200	3
O61114	NUTF2	Nuclear transport factor 2 OS=Homo sapiens OX=9606	2	3	3	3	24.4	24.4	24.4	14.478	127	0	19.81	42056000	4
O61115	FAU	40S ribosomal protein S30 OS=Homo sapiens OX=9606	2	3	3	3	20.3	20.3	20.3	6.6478	59	0	20.319	6796500	3
O61116	RPL11	60S ribosomal protein L11 OS=Homo sapiens OX=9606	2	3	3	3	19.7	19.7	19.7	20.252	178	0	20.756	5130000	2
O61117	TMSB10	Thymosin beta-10 OS=Homo sapiens OX=9606	1	3	3	3	68.2	68.2	68.2	5.0256	44	0	20.105	10038000	4
O61118	YBX1	Y-box-binding protein 1 OS=Homo sapiens OX=9606	3	5	5	3	25.3	25.3	20.4	35.924	324	0	54.684	7600900	7
O61119	PAFAH1B2	Platelet-activating factor acetylhydrolase IB subunit beta OS=Homo sapiens OX=9606	2	3	3	3	17.5	17.5	17.5	25.569	229	0	20.858	2280300	2
O61120	PSME1	Proteasome activator complex subunit 1 OS=Homo sapiens OX=9606	3	3	3	3	10	10	10	28.723	249	0	16.889	3990300	3
O61121	LRP1	Prolow-density lipoprotein receptor-related protein 1 OS=Homo sapiens OX=9606	2	3	3	3	0.8	0.8	0.8	504.6	4544	0	17.884	2116500	2
O61122	G3BP1	Ras GTPase-activating protein-binding protein 1 OS=Homo sapiens OX=9606	2	3	3	3	7.5	7.5	7.5	52.164	466	0	19.686	2838600	2
O61123	DAG1	Dystroglycan OS=Homo sapiens OX=9606	1	3	3	3	4.8	4.8	4.8	97.44	895	0	19.889	2236500	2
O61124	MCM6	DNA replication licensing factor MCM6 OS=Homo sapiens OX=9606	1	3	3	3	2.6	2.6	2.6	92.888	821	0	16.25	1316400	3
O61125	PAFAH1B3	Platelet-activating factor acetylhydrolase IB subunit gamma OS=Homo sapiens OX=9606	3	3	3	3	11.3	11.3	11.3	25.734	231	0	17.956	3740800	4
O61126	EBP	3-beta-hydroxysteroid-Delta(8),Delta(7)-isomerase OS=Homo sapiens OX=9606	4	3	3	3	16.5	16.5	16.5	26.352	230	0	23.898	6483800	4
O61127	RPS26P11	Putative 40S ribosomal protein S26-like 1 OS=Homo sapiens OX=9606	2	3	3	3	31.3	31.3	31.3	13.002	115	0	21.447	20054000	3
O61128	LAMTOR1	Ragulator complex protein LAMTOR1 OS=Homo sapiens OX=9606	5	3	3	3	25.5	25.5	25.5	17.745	161	0	19.049	3184400	2
O61129	TWF2	Twinfilin-2 OS=Homo sapiens OX=9606	4	3	3	3	14.3	14.3	14.3	39.548	349	0	23.096	1477900	2
O61130	QSOX2	Sulfhydryl oxidase 2 OS=Homo sapiens OX=9606	2	3	3	3	4.3	4.3	4.3	77.528	698	0	15.904	1575500	1
O61131	TOR1AIP2	Torsin-1A-interacting protein 2 OS=Homo sapiens OX=9606	1	3	3	3	10.2	10.2	10.2	51.263	470	0	21.011	4696600	5
O61132	TNPO1	Transportin-1 OS=Homo sapiens OX=9606	5	3	3	3	3.7	3.7	3.7	102.35	898	0	21.188	1591500	3
O61133	IPO9	Importin-9 OS=Homo sapiens OX=9606	1	3	3	3	3.4	3.4	3.4	115.96	1041	0	19.129	3135700	3
O61134	TMED9	Transmembrane emp24 domain-containing protein 9 OS=Homo sapiens OX=9606	1	3	3	3	11.9	11.9	11.9	27.277	235	0	19.67	7543800	3
O61135	ITPA	Inosine triphosphate pyrophosphatase OS=Homo sapiens OX=9606	1	3	3	3	22.2	22.2	22.2	21.445	194	0	19.052	3217300	4
O61136	OLA1	Obg-like ATPase 1 OS=Homo sapiens OX=9606	3	3	3	3	9.8	9.8	9.8	44.743	396	0	19.895	3427600	3
O61137	ADPRS	ADP-ribose glycohydrolase ARH3 OS=Homo sapiens OX=9606	1	3	3	3	9.9	9.9	9.9	38.946	363	0	20.131	4687800	2
O61138	RCC2	Protein RCC2 OS=Homo sapiens OX=9606	1	3	3	3	7.1	7.1	7.1	56.084	522	0	16.754	1148300	2
O61139	DNAJB11	DnaJ homolog subfamily B member 11 OS=Homo sapiens OX=9606	2	3	3	3	14	14	14	40.513	358	0	23.68	3832000	3
O61140	UBQLN2	Ubiquilin-2 OS=Homo sapiens OX=9606	1	4	3	3	9.9	7.2	7.2	65.695	624	0	27.088	1688500	2
O61141	UCHL5	Ubiquitin carboxyl-terminal hydrolase isozyme L5 OS=Homo sapiens OX=9606	8	3	3	3	11.2	11.2	11.2	37.606	329	0	18.046	4540200	2
O61142	UCHL3	Ubiquitin carboxyl-terminal hydrolase OS=Homo sapiens OX=9606	3	3	3	3	18.6	18.6	18.6	21.945	194	0	21.895	7835100	3
O61143	NAA50	N-alpha-acetyltransferase 50 OS=Homo sapiens OX=9606	9	3	3	3	50.6	50.6	50.6	9.4367	81	0	19.307	5895800	2
O61144	HNRNPM	Heterogeneous nuclear ribonucleoprotein M OS=Homo sapiens OX=9606	5	3	3	3	7.3	7.3	7.3	77.569	730	0	18.526	5076800	3
O61145	PITPNB	Phosphatidylinositol transfer protein beta isoform OS=Homo sapiens OX=9606	4	4	3	3	20.7	17.7	17.7	31.581	271	0	21.007	6160700	3
O61146	TMED7-TICAM2	Protein TMED7-TICAM2 OS=Homo sapiens OX=9606	2	3	3	3	22.3	22.3	22.3	21.233	188	0	24.931	6657300	5
O61147	NAA15	N-alpha-acetyltransferase 15, NatA auxiliary subunit OS=Homo sapiens OX=9606	3	3	3	3	3.6	3.6	3.6	101.2	865	0	19.851	3100600	3
O61148	RPS15	40S ribosomal protein S15 OS=Homo sapiens OX=9606	8	3	3	3	33.1	33.1	33.1	13.742	118	0	18.32	1190800	2
O61149	TAPBP	Tapasin OS=Homo sapiens OX=9606	8	3	3	3	7.6	7.6	7.6	47.606	448	0	20.579	3110200	3
O61150	BAG6	BCL2-associated athanogene 6 OS=Homo sapiens OX=9606	16	3	3	3	3.2	3.2	3.2	113.46	1077	0	19.676	3863500	3
O61151	FASN	3-hydroxyacyl-[acyl-carrier-protein] dehydratase OS=Homo sapiens OX=9606	2	3	3	3	1.8	1.8	1.8	273.2	2509	0	19.492	1482300	3
O61152	TYMP	Thymidine phosphorylase (Fragment) OS=Homo sapiens OX=9606	5	3	3	3	14.2	14.2	14.2	29.597	289	0	20.985	3509300	4
O61153	PTBP1	Polypyrimidine tract-binding protein 1 OS=Homo sapiens OX=9606	10	3	3	3	6.8	6.8	6.8	56.51	527	0	21.382	3834600	3
O61154	XRCC6	ATP-dependent DNA helicase 2 subunit 1 OS=Homo sapiens OX=9606	2	3	3	3	6.8	6.8	6.8	64.283	559	0	18.015	1445400	2
O61155	ACTR3	Actin-related protein 3 OS=Homo sapiens OX=9606	8	3	3	3	8.4	8.4	8.4	42.003	367	0	17.612	1352600	3
O61156	ILF2	Interleukin enhancer-binding factor 2 OS=Homo sapiens OX=9606	4	3	3	3	11.1	11.1	11.1	38.91	352	0	17.575	4153200	2
O61157	CORO1C	Coronin OS=Homo sapiens OX=9606	10	3	3	3	11.4	11.4	11.4	41.603	369	0	16.705	3332600	3
O61158	PFN2	Profilin OS=Homo sapiens OX=9606	5	3	3	3	26.4	26.4	26.4	9.7982	91	0	22.759	7237700	3
O61159	PPP1R7	Protein phosphatase 1 regulatory subunit 7 (Fragment) OS=Homo sapiens OX=9606	6	3	3	3	13.5	13.5	13.5	32.39	282	0	17.435	3723300	3
O61160	CRTAP	Cartilage-associated protein OS=Homo sapiens OX=9606	2	3	3	3	8.4	8.4	8.4	41.432	358	0	19.886	5010000	5
O61161	GART	Trifunctional purine biosynthetic protein adenosine-3 (Fragment) OS=Homo sapiens OX=9606	6	3	3	3	41.2	41.2	41.2	14.46	136	0	23.505	6007700	3
O61162	UBE2H	Ubiquitin-conjugating enzyme E2 H (Fragment) OS=Homo sapiens OX=9606	5	3	3	3	20.4	20.4	20.4	11.545	103	0	18.244	2334400	3
O61163	HNRNPAB	Heterogeneous nuclear ribonucleoprotein A/B OS=Homo sapiens OX=9606	4	3	3	3	15.7	15.7	15.7	30.302	280	0	19.862	1956200	3
O61164	RPL9	60S ribosomal protein L9 (Fragment) OS=Homo sapiens OX=9606	6	3	3	3	15.5	15.5	15.5	20.775	181	0	20.638	12159000	4
O61165	ELOC	Elongin-C (Fragment) OS=Homo sapiens OX=9606	3	3	3	3	47.2	47.2	47.2	9.9601	89	0	32.303	7326200	3
O61166	SKP1	S-phase kinase-associated protein 1 OS=Homo sapiens OX=9606	5	3	3	3	25.8	25.8	25.8	18.72	163	0	18.668	2689700	3
O61167	CAST	Calpain inhibitor (Fragment) OS=Homo sapiens OX=9606	19	3	3	3	5.1	5.1	5.1	69.749	642	0	17.291	4918100	3
O61168	PLOD2	Procollagen-lysine 5-dioxygenase OS=Homo sapiens OX=9606	3	3	3	3	6.3	6.3	6.3	81.169	703	0	18.333	387300000	3
O61169	RPL15	Ribosomal protein L15 (Fragment) OS=Homo sapiens OX=9606	6	3	3	3	29.3	29.3	29.3	15.722	133	0	23.212	6639500	4
O61170	UBXN1	UBX domain-containing protein 1 (Fragment) OS=Homo sapiens OX=9606	4	3	3	3	12.4	12.4	12.4	32.611	290	0	19.427	3355800	3
O61171	CSRP1	Cysteine and glycine-rich protein 1 OS=Homo sapiens OX=9606	4	3	3	3	33.8	33.8	33.8	16.94	160	0	26.042	6147500	3
O61172	TCP1	T-complex protein 1 subunit alpha OS=Homo sapiens OX=9606	5	3	3	3	10.2	10.2	10.2	36.456	332	0	20.595	4981300	2
O61173	NACA	Nascent polypeptide-associated complex subunit alpha (Fragment) OS=Homo sapiens OX=9606	9	3	3	3	42.3	42.3	42.3	7.813	71	0	25.499	15236000	6
O61174	FAM162A	Protein FAM162A OS=Homo sapiens OX=9606	3	3	3	3	26.4	26.4	26.4	16.515	144	0	18.287	5334700	3
O61175	UBA3	NEDD8-activating enzyme E1 catalytic subunit OS=Homo sapiens OX=9606	2	3	3	3	9.5	9.5	9.5	47.271	422	0	18.775	9427400	3
O61176	CAPRIN1	Caprin-1 OS=Homo sapiens OX=9606	3	3	3	3	4.9	4.9	4.9	70.353	628	0	21.602	5747400	2
O61177	RPL21	60S ribosomal protein L21 OS=Homo sapiens OX=9606	4	3	3	3	39.1	39.1	39.1	9.8864	87	0	28.422	14134000	4
O61178	NRDC	Nardilysin OS=Homo sapiens OX=9606	5	3	3	3	2.9	2.9	2.9	125.12	1087	0	20.492	2545100	3
O61179	APEX1	DNA-(apurinic or apyrimidinic site) endonuclease (Fragment) OS=Homo sapiens OX=9606	10	3	3	3	45.8	45.8	45.8	11.691	107	0	18.095	2097400	3
O61180	PPP5C	Serine/threonine-protein phosphatase (Fragment) OS=Homo sapiens OX=9606	3	3	3	3	8.2	8.2	8.2	55.096	485	0	18.235	3936000	2
O61181	COPS2	COP9 signalosome complex subunit 2 (Fragment) OS=Homo sapiens OX=9606	4	3	3	3	14.1	14.1	14.1	30.91	263	0	17.648	1106600	1
O61182	RPL28	60S ribosomal protein L28 OS=Homo sapiens OX=9606	4	3	3	3	33	33	33	12.39	112	0	21.882	9183400	4
O61183	GLG1	Golgi apparatus protein 1 OS=Homo sapiens OX=9606	3	3	3	3	5.4	5.4	5.4	79.317	698	0	19.61	1885800	3
O61184	UQCRC2	Cytochrome b-c1 complex subunit 2, mitochondrial OS=Homo sapiens OX=9606	4	3	3	3	12.4	12.4	12.4	44.634	412	0	20.765	1212500	2
O61185	HMOX2	Heme oxygenase (biliverdin-producing) (Fragment) OS=Homo sapiens OX=9606	8	3	3	3	17.9	17.9	17.9	26.578	229	0	18.56	4410200	3
O61186	PITPNA	Phosphatidylinositol transfer protein alpha isoform (Fragment) OS=Homo sapiens OX=9606	9	4	4	3	16.3	16.3	12.4	24.64	209	0	24.127	6946800	5
O61187	SRSF2	Serine/arginine-rich splicing factor 2 (Fragment) OS=Homo sapiens OX=9606	4	3	3	3	23.1	23.1	23.1	15.156	130	0	17.537	4759500	3
O61188	#N/A	#N/A	5	3	3	3	14.9	14.9	14.9	37.98	342	0	25.774	8224400	2
O61189	PSMD8	26S proteasome non-ATPase regulatory subunit 8 OS=Homo sapiens OX=9606	4	3	3	3	18.6	18.6	18.6	19.781	172	0	20.585	5121500	3
O61190	HNRNPL	Heterogeneous nuclear ribonucleoprotein L (Fragment) OS=Homo sapiens OX=9606	4	3	3	3	11.9	11.9	11.9	58.362	530	0	23.131	6476600	5
O61191	TUBB	Tubulin beta chain OS=Homo sapiens OX=9606	11	24	4	3	56.1	16.9	13.4	47.766	426	0	47.118	47216000	6
O61192	DDX39B	RNA helicase OS=Homo sapiens OX=9606	30	3	3	3	6.4	6.4	6.4	48.825	425	0	18.363	2184000	2
O61193	LMNA	Prelamin-A/C OS=Homo sapiens OX=9606	4	3	3	3	9	9	9	55.762	491	0	19.973	2990600	3
O61194	STK26	Serine/threonine-protein kinase 26 OS=Homo sapiens OX=9606	14	3	3	3	6.6	6.6	6.6	43.867	392	0	18.196	3828800	4
O61195	AKR1C3	Aldo-keto reductase family 1 member C3 (Fragment) OS=Homo sapiens OX=9606	11	3	3	3	23.2	23.2	23.2	17.563	155	0	18.306	1717600	2
O61196	DFFA	DNA fragmentation factor subunit alpha OS=Homo sapiens OX=9606	2	4	4	4	14.2	14.2	14.2	36.521	331	0	25.503	4800400	3
O61197	KPNA3	Importin subunit alpha-4 OS=Homo sapiens OX=9606	1	4	4	4	5.8	5.8	5.8	57.81	521	0	23.905	3835800	4
O61198	PODXL	Podocalyxin OS=Homo sapiens OX=9606	1	4	4	4	6.8	6.8	6.8	58.635	558	0	25.535	12459000	5
O61199	HNRNPR	Heterogeneous nuclear ribonucleoprotein R OS=Homo sapiens OX=9606	3	7	7	4	12.5	12.5	7.6	70.942	633	0	43.709	16279000	4
O61200	SYNCRIP	Heterogeneous nuclear ribonucleoprotein Q OS=Homo sapiens OX=9606	3	7	4	4	14	9	9	69.602	623	0	24.394	6849600	2
O61201	PDCD6	Programmed cell death protein 6 OS=Homo sapiens OX=9606	4	4	4	4	23.6	23.6	23.6	21.868	191	0	29.582	9942400	5
O61202	ACTL6A	Actin-like protein 6A OS=Homo sapiens OX=9606	2	4	4	4	16.6	16.6	16.6	47.46	429	0	36.63	9428900	6
O61203	GSR	Glutathione reductase, mitochondrial OS=Homo sapiens OX=9606	3	4	4	4	11.5	11.5	11.5	56.256	522	0	31.741	8270800	5
O61204	AK1	Adenylate kinase isoenzyme 1 OS=Homo sapiens OX=9606	3	4	4	4	26.3	26.3	26.3	21.635	194	0	23.705	6152100	3
O61205	SOD2	Superoxide dismutase [Mn], mitochondrial OS=Homo sapiens OX=9606	5	4	4	4	18.9	18.9	18.9	24.75	222	0	24.903	7925800	6
O61206	EIF2S1	Eukaryotic translation initiation factor 2 subunit 1 OS=Homo sapiens OX=9606	3	4	4	4	11.7	11.7	11.7	36.112	315	0	24.898	3976400	4
O61207	GLA	Alpha-galactosidase A OS=Homo sapiens OX=9606	4	4	4	4	10.3	10.3	10.3	48.766	429	0	24.086	9085500	4
O61208	RO60	60 kDa SS-A/Ro ribonucleoprotein OS=Homo sapiens OX=9606	3	4	4	4	10	10	10	60.67	538	0	28.939	10166000	5
O61209	SLC25A6	ADP/ATP translocase 3 OS=Homo sapiens OX=9606	2	14	4	4	33.9	12.4	12.4	32.866	298	0	37.177	6975600	4
O61210	COX5A	Cytochrome c oxidase subunit 5A, mitochondrial OS=Homo sapiens OX=9606	5	4	4	4	27.3	27.3	27.3	16.762	150	0	25.432	12848000	5
O61211	PTGS1	Prostaglandin G/H synthase 1 OS=Homo sapiens OX=9606	4	4	4	4	9.2	9.2	9.2	68.686	599	0	37.786	6501500	4
O61212	PSMB6	Proteasome subunit beta type-6 OS=Homo sapiens OX=9606	3	4	4	4	29.7	29.7	29.7	25.357	239	0	29.526	47220000	6
O61213	FEN1	Flap endonuclease 1 OS=Homo sapiens OX=9606	3	4	4	4	8.7	8.7	8.7	42.592	380	0	24.09	4604600	3
O61214	CAPZA2	F-actin-capping protein subunit alpha-2 OS=Homo sapiens OX=9606	4	6	4	4	23.1	17.5	17.5	32.949	286	0	27.166	7966300	3
O61215	ALDH9A1	4-trimethylaminobutyraldehyde dehydrogenase OS=Homo sapiens OX=9606	1	4	4	4	9.1	9.1	9.1	53.801	494	0	23.534	11339000	4
O61216	RAB5C	Ras-related protein Rab-5C OS=Homo sapiens OX=9606	10	4	4	4	23.1	23.1	23.1	23.482	216	0	27.349	14029000	4
O61217	SSR4	Translocon-associated protein subunit delta OS=Homo sapiens OX=9606	2	4	4	4	15.6	15.6	15.6	18.998	173	0	25.077	3556400	5
O61218	PSMD7	26S proteasome non-ATPase regulatory subunit 7 OS=Homo sapiens OX=9606	3	4	4	4	18.2	18.2	18.2	37.025	324	0	34.629	9949600	5
O61219	MANF	Mesencephalic astrocyte-derived neurotrophic factor OS=Homo sapiens OX=9606	3	4	4	4	35.7	35.7	35.7	20.7	182	0	29.922	28542000	9
O61220	EIF6	Eukaryotic translation initiation factor 6 OS=Homo sapiens OX=9606	6	4	4	4	28.6	28.6	28.6	26.599	245	0	44.605	2032200	3
O61221	CDC42	Cell division control protein 42 homolog OS=Homo sapiens OX=9606	4	5	4	4	36.6	30.9	30.9	21.258	191	0	26.772	22772000	5
O61222	RPS7	40S ribosomal protein S7 OS=Homo sapiens OX=9606	3	4	4	4	27.8	27.8	27.8	22.127	194	0	26.323	6705600	3
O61223	RPS6	40S ribosomal protein S6 OS=Homo sapiens OX=9606	3	4	4	4	16.9	16.9	16.9	28.68	249	0	27.563	9539500	5
O61224	GNB1	Guanine nucleotide-binding protein G(I)/G(S)/G(T) subunit beta-1 OS=Homo sapiens OX=9606	17	4	4	4	13.5	13.5	13.5	37.377	340	0	30.051	16453000	7
O61225	ARF1	ADP-ribosylation factor 1 OS=Homo sapiens OX=9606	10	7	7	4	56.4	56.4	27.6	20.697	181	0	53.925	47909000	10
O61226	EEF1A2	Elongation factor 1-alpha 2 OS=Homo sapiens OX=9606	5	11	4	4	34.3	17.5	17.5	50.47	463	0	34.085	42469000	7
O61227	TWF1	Twinfilin-1 OS=Homo sapiens OX=9606	3	4	4	4	14.6	14.6	14.6	40.282	350	0	33.297	7359500	4
O61228	CBX3	Chromobox protein homolog 3 OS=Homo sapiens OX=9606	4	4	4	4	20.8	20.8	20.8	20.811	183	0	26.3	9676400	6
O61229	PCBP1	Poly(rC)-binding protein 1 OS=Homo sapiens OX=9606	3	7	7	4	27.8	27.8	15.2	37.497	356	0	52.008	23918000	8
O61230	PSMD5	26S proteasome non-ATPase regulatory subunit 5 OS=Homo sapiens OX=9606	2	4	4	4	9.9	9.9	9.9	56.195	504	0	27.915	4166700	3
O61231	P3H1	Prolyl 3-hydroxylase 1 OS=Homo sapiens OX=9606	3	4	4	4	6.1	6.1	6.1	83.393	736	0	27.301	5074200	4
O61232	HIKESHI	Protein Hikeshi OS=Homo sapiens OX=9606	4	4	4	4	22.8	22.8	22.8	21.627	197	0	27.921	11962000	4
O61233	ATL3	Atlastin-3 OS=Homo sapiens OX=9606	3	4	4	4	10.4	10.4	10.4	60.541	541	0	24.321	4909900	5
O61234	HUWE1	E3 ubiquitin-protein ligase HUWE1 OS=Homo sapiens OX=9606	2	4	4	4	1.3	1.3	1.3	481.89	4374	0	27.096	2446500	4
O61235	GPX8	Probable glutathione peroxidase 8 OS=Homo sapiens OX=9606	3	4	4	4	21.1	21.1	21.1	23.881	209	0	24.5	5963500	2
O61236	LRRC59	Leucine-rich repeat-containing protein 59 OS=Homo sapiens OX=9606	1	4	4	4	16.6	16.6	16.6	34.93	307	0	28.98	8833400	5
O61237	RCN3	Reticulocalbin-3 OS=Homo sapiens OX=9606	3	4	4	4	21	21	21	37.493	328	0	33.949	6718200	4
O61238	COPS4	COP9 signalosome complex subunit 4 OS=Homo sapiens OX=9606	4	4	4	4	12.8	12.8	12.8	46.268	406	0	24.758	2654800	4
O61239	ADI1	1,2-dihydroxy-3-keto-5-methylthiopentene dioxygenase OS=Homo sapiens OX=9606	3	4	4	4	30.7	30.7	30.7	21.498	179	0	32.318	13091000	6
O61240	CHMP4B	Charged multivesicular body protein 4b OS=Homo sapiens OX=9606	1	4	4	4	20.1	20.1	20.1	24.95	224	0	37.525	5842400	4
O61241	SLC25A22	Mitochondrial glutamate carrier 1 OS=Homo sapiens OX=9606	18	4	4	4	13.9	13.9	13.9	34.47	323	0	29.595	7029900	3
O61242	PCYOX1	Prenylcysteine oxidase 1 OS=Homo sapiens OX=9606	5	4	4	4	12.3	12.3	12.3	56.639	505	0	26.37	7402800	4
O61243	CDV3	Protein CDV3 homolog OS=Homo sapiens OX=9606	6	4	4	4	43.4	43.4	43.4	27.335	258	0	24.56	4124000	4
O61244	CNPY2	Protein canopy homolog 2 OS=Homo sapiens OX=9606	5	4	4	4	33.5	33.5	33.5	20.652	182	0	26.844	11456000	3
O61245	RPL36	60S ribosomal protein L36 OS=Homo sapiens OX=9606	3	4	4	4	31.4	31.4	31.4	12.254	105	0	24.599	10087000	5
O61246	SRPRB	Signal recognition particle receptor subunit beta OS=Homo sapiens OX=9606	2	4	4	4	18.5	18.5	18.5	29.702	271	0	26.776	7219100	6
O61247	DDOST	Dolichyl-diphosphooligosaccharide--protein glycosyltransferase 48 kDa subunit OS=Homo sapiens OX=9606	3	4	4	4	10.9	10.9	10.9	48.799	439	0	26.873	6352900	4
O61248	FTO	Alpha-ketoglutarate-dependent dioxygenase FTO OS=Homo sapiens OX=9606	9	4	4	4	14	14	14	48.605	421	0	29.435	7042800	4
O61249	ALDH7A1	Alpha-aminoadipic semialdehyde dehydrogenase (Fragment) OS=Homo sapiens OX=9606	14	4	4	4	14.1	14.1	14.1	37.713	348	0	25.99	6648900	4
O61250	FBXO2	F-box only protein 2 (Fragment) OS=Homo sapiens OX=9606	3	4	4	4	18.3	18.3	18.3	30.299	268	0	29.315	8423600	4
O61251	RNPEP	Aminopeptidase B OS=Homo sapiens OX=9606	5	4	4	4	10.8	10.8	10.8	68.168	611	0	29.449	6025900	4
O61252	JMJD6	Bifunctional arginine demethylase and lysyl-hydroxylase JMJD6 OS=Homo sapiens OX=9606	4	4	4	4	19.1	19.1	19.1	39.241	335	0	23.322	3064600	3
O61253	DEK	Protein DEK OS=Homo sapiens OX=9606	8	4	4	4	12.4	12.4	12.4	39.5	347	0	25.214	3292200	3
O61254	LASP1	LIM and SH3 domain protein 1 (Fragment) OS=Homo sapiens OX=9606	3	4	4	4	31.9	31.9	31.9	18.98	166	0	36.648	10353000	5
O61255	RPL23	60S ribosomal protein L23 (Fragment) OS=Homo sapiens OX=9606	6	4	4	4	31.9	31.9	31.9	9.6694	91	0	29.275	5999400	3
O61256	NSDHL	Sterol-4-alpha-carboxylate 3-dehydrogenase, decarboxylating (Fragment) OS=Homo sapiens OX=9606	2	4	4	4	24.8	24.8	24.8	28.146	254	0	29.373	5407600	4
O61257	CYCS	Cytochrome c (Fragment) OS=Homo sapiens OX=9606	3	4	4	4	27.7	27.7	27.7	11.333	101	0	24.089	16453000	7
O61258	RPL24	60S ribosomal protein L24 OS=Homo sapiens OX=9606	3	4	4	4	38	38	38	14.369	121	0	27.425	7433200	4
O61259	RPL32	60S ribosomal protein L32 (Fragment) OS=Homo sapiens OX=9606	4	4	4	4	25.6	25.6	25.6	15.616	133	0	28.852	17245000	5
O61260	TMEM33	Transmembrane protein 33 (Fragment) OS=Homo sapiens OX=9606	3	4	4	4	18.9	18.9	18.9	25.223	222	0	25.96	3044600	4
O61261	RPL30	60S ribosomal protein L30 (Fragment) OS=Homo sapiens OX=9606	5	4	4	4	43	43	43	12.656	114	0	27.955	9195400	4
O61262	RPL14	60S ribosomal protein L14 OS=Homo sapiens OX=9606	2	4	4	4	34.7	34.7	34.7	14.558	124	0	26.727	27151000	9
O61263	UBA5	UFM1-activating enzyme OS=Homo sapiens OX=9606	7	4	4	4	13.3	13.3	13.3	38.753	347	0	28.745	13984000	8
O61264	CALD1	Caldesmon OS=Homo sapiens OX=9606	5	4	4	4	10.8	10.8	10.8	61.705	536	0	27.024	4906200	4
O61265	RPL27A	60S ribosomal protein L27a OS=Homo sapiens OX=9606	4	4	4	4	35.2	35.2	35.2	12.201	108	0	27.756	14883000	6
O61266	MYG1	MYG1 exonuclease OS=Homo sapiens OX=9606	4	4	4	4	23.5	23.5	23.5	24.058	213	0	27.66	13022000	5
O61267	RTN4	Reticulon OS=Homo sapiens OX=9606	4	4	4	4	21.7	21.7	21.7	37.144	345	0	27.07	21941000	5
O61268	EIF5A2	Eukaryotic translation initiation factor 5A OS=Homo sapiens OX=9606	8	4	4	4	37.1	37.1	37.1	11.687	105	0	31.758	8462900	4
O61269	CD44	CD44 antigen OS=Homo sapiens OX=9606	12	4	4	4	21.4	21.4	21.4	22.683	206	0	27.134	14968000	5
O61270	PSMD1	26S proteasome non-ATPase regulatory subunit 1 (Fragment) OS=Homo sapiens OX=9606	3	4	4	4	29.2	29.2	29.2	20.317	192	0	26.453	7729200	5
O61271	PSMD13	26S proteasome non-ATPase regulatory subunit 13 OS=Homo sapiens OX=9606	7	4	4	4	11.7	11.7	11.7	39.829	349	0	23.549	4497500	3
O61272	PSME3	Proteasome activator complex subunit 3 OS=Homo sapiens OX=9606	11	4	4	4	20.7	20.7	20.7	23.259	198	0	28.535	10659000	4
O61273	RPS5	40S ribosomal protein S5 (Fragment) OS=Homo sapiens OX=9606	4	4	4	4	18	18	18	22.391	200	0	27.614	24926000	3
O61274	UBA6	Ubiquitin-like modifier-activating enzyme 6 OS=Homo sapiens OX=9606	2	5	5	5	5.5	5.5	5.5	117.97	1052	0	32.188	4889900	6
O61275	PGP	Glycerol-3-phosphate phosphatase OS=Homo sapiens OX=9606	1	5	5	5	22.1	22.1	22.1	34.006	321	0	33.068	35314000	5
O61276	PDXK	Pyridoxal kinase OS=Homo sapiens OX=9606	3	5	5	5	24	24	24	35.102	312	0	34.931	11664000	6
O61277	PPM1G	Protein phosphatase 1G OS=Homo sapiens OX=9606	1	5	5	5	12.3	12.3	12.3	59.271	546	0	31.885	7911500	4
O61278	PSMD3	26S proteasome non-ATPase regulatory subunit 3 OS=Homo sapiens OX=9606	2	5	5	5	11.8	11.8	11.8	60.977	534	0	31.45	5919700	5
O61279	TOMM70	Mitochondrial import receptor subunit TOM70 OS=Homo sapiens OX=9606	1	5	5	5	9	9	9	67.454	608	0	41.522	3914200	5
O61280	ITGB1	Integrin beta-1 OS=Homo sapiens OX=9606	7	5	5	5	6.4	6.4	6.4	88.414	798	0	41.378	13356000	5
O61281	EPHX1	Epoxide hydrolase 1 OS=Homo sapiens OX=9606	3	5	5	5	16.3	16.3	16.3	52.948	455	0	41.417	12013000	6
O61282	EPRS1	Bifunctional glutamate/proline--tRNA ligase OS=Homo sapiens OX=9606	1	5	5	5	4.6	4.6	4.6	170.59	1512	0	36.347	6363100	4
O61283	ENO2	Gamma-enolase OS=Homo sapiens OX=9606	4	9	6	5	26.7	18.2	16.4	47.268	434	0	39.738	21981000	9
O61284	TXN	Thioredoxin OS=Homo sapiens OX=9606	1	5	5	5	42.9	42.9	42.9	11.737	105	0	41.046	95899000	8
O61285	CLU	Clusterin OS=Homo sapiens OX=9606	10	5	5	5	14.9	14.9	14.9	52.494	449	0	38.141	58019000	4
O61286	CKB	Creatine kinase B-type OS=Homo sapiens OX=9606	4	5	5	5	20.2	20.2	20.2	42.644	381	0	39.667	15924000	8
O61287	H1-5	Histone H1.5 OS=Homo sapiens OX=9606	1	5	5	5	23.9	23.9	23.9	22.58	226	0	34.283	11623000	6
O61288	EIF2S2	Eukaryotic translation initiation factor 2 subunit 2 OS=Homo sapiens OX=9606	1	5	5	5	15.3	15.3	15.3	38.388	333	0	30.591	3576900	5
O61289	SFPQ	Splicing factor, proline- and glutamine-rich OS=Homo sapiens OX=9606	5	5	5	5	9.6	9.6	9.6	76.149	707	0	30.442	7333800	3
O61290	S100A4	Protein S100-A4 OS=Homo sapiens OX=9606	1	5	5	5	31.7	31.7	31.7	11.728	101	0	33.441	91705000	12
O61291	DDT	D-dopachrome decarboxylase OS=Homo sapiens OX=9606	4	5	5	5	40.7	40.7	40.7	12.712	118	0	43.398	48511000	10
O61292	CTH	Cystathionine gamma-lyase OS=Homo sapiens OX=9606	1	5	5	5	16	16	16	44.508	405	0	33.494	10235000	5
O61293	RDX	Radixin OS=Homo sapiens OX=9606	4	15	5	5	21.8	9.3	9.3	68.563	583	0	31.637	2548000	2
O61294	ATP6V1A	V-type proton ATPase catalytic subunit A OS=Homo sapiens OX=9606	3	5	5	5	11	11	11	68.303	617	0	46.726	7304300	5
O61295	USP5	Ubiquitin carboxyl-terminal hydrolase 5 OS=Homo sapiens OX=9606	2	5	5	5	8.9	8.9	8.9	95.785	858	0	34.733	10136000	5
O61296	GMPS	GMP synthase [glutamine-hydrolyzing] OS=Homo sapiens OX=9606	1	5	5	5	10.4	10.4	10.4	76.715	693	0	31.685	6615800	5
O61297	THOP1	Thimet oligopeptidase OS=Homo sapiens OX=9606	7	5	5	5	9.9	9.9	9.9	78.839	689	0	28.343	5294600	4
O61298	YARS1	Tyrosine--tRNA ligase, cytoplasmic OS=Homo sapiens OX=9606	2	5	5	5	8.7	8.7	8.7	59.143	528	0	29.264	5988900	3
O61299	RAD23B	UV excision repair protein RAD23 homolog B OS=Homo sapiens OX=9606	4	5	5	5	20.3	20.3	20.3	43.171	409	0	32.278	4866700	3
O61300	ADK	Adenosine kinase OS=Homo sapiens OX=9606	1	5	5	5	18.2	18.2	18.2	40.545	362	0	33.197	13548000	6
O61301	TPD52	Tumor protein D52 OS=Homo sapiens OX=9606	4	7	7	5	53.6	53.6	38.4	24.327	224	0	60.146	33946000	10
O61302	RAB2A	Ras-related protein Rab-2A OS=Homo sapiens OX=9606	7	5	5	5	32.1	32.1	32.1	23.545	212	0	43.617	10049000	5
O61303	RPL23A	60S ribosomal protein L23a OS=Homo sapiens OX=9606	6	5	5	5	28.2	28.2	28.2	17.695	156	0	29.942	15702000	5
O61304	RPL10A	60S ribosomal protein L10a OS=Homo sapiens OX=9606	1	5	5	5	29	29	29	24.831	217	0	30.804	26490000	7
O61305	GNAS	Guanine nucleotide-binding protein G(s) subunit alpha isoforms short OS=Homo sapiens OX=9606	20	6	5	5	19	16.2	16.2	45.664	394	0	31.379	9891800	5
O61306	PPP2R2A	Serine/threonine-protein phosphatase 2A 55 kDa regulatory subunit B alpha isoform OS=Homo sapiens OX=9606	6	7	7	5	19.2	19.2	13.6	51.691	447	0	49.626	16971000	7
O61307	FOXK1	Forkhead box protein K1 OS=Homo sapiens OX=9606	4	5	5	5	7.1	7.1	7.1	75.456	733	0	33.372	6373000	3
O61308	SLC7A5	Large neutral amino acids transporter small subunit 1 OS=Homo sapiens OX=9606	6	5	5	5	10.7	10.7	10.7	55.01	507	0	35.867	23749000	5
O61309	PLOD1	Procollagen-lysine,2-oxoglutarate 5-dioxygenase 1 OS=Homo sapiens OX=9606	2	5	5	5	7.2	7.2	7.2	83.549	727	0	30.407	5380900	7
O61310	NUCB1	Nucleobindin-1 OS=Homo sapiens OX=9606	3	5	5	5	14.1	14.1	14.1	53.879	461	0	35.329	7712200	8
O61311	AHNAK	Neuroblast differentiation-associated protein AHNAK OS=Homo sapiens OX=9606	1	5	5	5	4	4	4	629.09	5890	0	28.636	4239700	5
O61312	UBE2V1	Ubiquitin-conjugating enzyme E2 variant 1 OS=Homo sapiens OX=9606	9	9	9	5	51.7	51.7	32.7	16.495	147	0	62.672	48820000	9
O61313	NAE1	NEDD8-activating enzyme E1 regulatory subunit OS=Homo sapiens OX=9606	3	5	5	5	9.9	9.9	9.9	60.246	534	0	31.954	14042000	6
O61314	MESD	LRP chaperone MESD OS=Homo sapiens OX=9606	2	5	5	5	25.6	25.6	25.6	26.076	234	0	45.782	14972000	7
O61315	KARS1	Lysine--tRNA ligase OS=Homo sapiens OX=9606	5	5	5	5	9.9	9.9	9.9	68.047	597	0	32.671	5011200	4
O61316	EIF4H	Eukaryotic translation initiation factor 4H OS=Homo sapiens OX=9606	1	5	5	5	29.4	29.4	29.4	27.385	248	0	51.212	4160800	4
O61317	PTGES3	Prostaglandin E synthase 3 OS=Homo sapiens OX=9606	2	5	5	5	25	25	25	18.697	160	0	59.193	27416000	7
O61318	DPYSL2	Dihydropyrimidinase-related protein 2 OS=Homo sapiens OX=9606	6	5	5	5	14.2	14.2	14.2	62.293	572	0	35.23	5961000	6
O61319	WDR44	WD repeat-containing protein 44 OS=Homo sapiens OX=9606	2	5	5	5	7.4	7.4	7.4	101.37	913	0	33.522	8290600	5
O61320	C9orf64	Queuosine salvage protein OS=Homo sapiens OX=9606	3	5	5	5	12.3	12.3	12.3	39.028	341	0	33.779	4739400	4
O61321	CAND1	Cullin-associated NEDD8-dissociated protein 1 OS=Homo sapiens OX=9606	3	5	5	5	6.6	6.6	6.6	136.37	1230	0	28.382	4491400	5
O61322	PDCD6IP	Programmed cell death 6-interacting protein OS=Homo sapiens OX=9606	1	5	5	5	6.2	6.2	6.2	96.022	868	0	33.694	2526200	5
O61323	IRGQ	Immunity-related GTPase family Q protein OS=Homo sapiens OX=9606	2	5	5	5	12	12	12	62.717	623	0	30.268	7166800	4
O61324	NDRG1	Protein NDRG1 OS=Homo sapiens OX=9606	11	5	5	5	22.6	22.6	22.6	42.835	394	0	37.61	17621000	7
O61325	TFG	Protein TFG OS=Homo sapiens OX=9606	4	5	5	5	20.8	20.8	20.8	43.447	400	0	36.695	15248000	8
O61326	EFHD2	EF-hand domain-containing protein D2 OS=Homo sapiens OX=9606	6	5	5	5	20.4	20.4	20.4	26.697	240	0	34.01	6763500	4
O61327	GALM	Galactose mutarotase OS=Homo sapiens OX=9606	4	5	5	5	18.7	18.7	18.7	37.765	342	0	29.768	7268100	3
O61328	KCTD12	BTB/POZ domain-containing protein KCTD12 OS=Homo sapiens OX=9606	2	5	5	5	19.1	19.1	19.1	35.7	325	0	47.013	5745900	5
O61329	PSMB7	Proteasome subunit beta type-7 OS=Homo sapiens OX=9606	2	5	5	5	14.4	14.4	14.4	29.965	277	0	31.779	20066000	7
O61330	ADPGK	ADP-dependent glucokinase OS=Homo sapiens OX=9606	5	5	5	5	10.7	10.7	10.7	54.088	497	0	33.503	7555900	5
O61331	CNPY3	Protein canopy homolog 3 OS=Homo sapiens OX=9606	2	5	5	5	25.2	25.2	25.2	30.748	278	0	41.303	7678400	6
O61332	HTATIP2	Oxidoreductase HTATIP2 OS=Homo sapiens OX=9606	2	5	5	5	19.4	19.4	19.4	27.049	242	0	34.045	12100000	7
O61333	RAB1B	Ras-related protein Rab-1B OS=Homo sapiens OX=9606	5	6	6	5	34.3	34.3	28.9	22.171	201	0	41.822	32475000	9
O61334	MUC13	Mucin-13 OS=Homo sapiens OX=9606	1	5	5	5	14.8	14.8	14.8	54.603	512	0	35.618	15645000	5
O61335	TBC1D13	TBC1 domain family member 13 OS=Homo sapiens OX=9606	1	5	5	5	15.5	15.5	15.5	46.553	400	0	30.216	3212500	4
O61336	VAPA	Vesicle-associated membrane protein-associated protein A OS=Homo sapiens OX=9606	2	6	6	5	25.3	25.3	25.3	27.893	249	0	47.178	11376000	10
O61337	SLC25A10	Mitochondrial dicarboxylate carrier OS=Homo sapiens OX=9606	4	5	5	5	13.9	13.9	13.9	31.282	287	0	30.318	6909400	5
O61338	#N/A	#N/A	3	5	5	5	19.3	19.3	19.3	37.119	331	0	33.553	5235500	4
O61339	GBA	Glucosylceramidase OS=Homo sapiens OX=9606	4	5	5	5	10.2	10.2	10.2	50.263	449	0	30.155	13686000	6
O61340	CTPS1	CTP synthase OS=Homo sapiens OX=9606	8	5	5	5	11.9	11.9	11.9	63.723	564	0	28.832	8432800	4
O61341	RANBP1	Ran-specific GTPase-activating protein (Fragment) OS=Homo sapiens OX=9606	7	5	5	5	42.9	42.9	42.9	18.762	163	0	38.079	21743000	8
O61342	FLNB	Filamin-B OS=Homo sapiens OX=9606	3	5	5	5	3	3	3	256.28	2409	0	34.308	3303800	4
O61343	EIF4G1	Eukaryotic translation initiation factor 4 gamma 1 OS=Homo sapiens OX=9606	11	5	5	5	4.7	4.7	4.7	158.64	1436	0	33.5	6433300	5
O61344	PAICS	AIR carboxylase (Fragment) OS=Homo sapiens OX=9606	3	5	5	5	14.3	14.3	14.3	45.651	413	0	33.746	8102600	4
O61345	OTUB1	Ubiquitinyl hydrolase 1 OS=Homo sapiens OX=9606	6	5	5	5	28.2	28.2	28.2	28.05	241	0	35.711	5102200	5
O61346	HMBS	Hydroxymethylbilane synthase OS=Homo sapiens OX=9606	10	5	5	5	23.6	23.6	23.6	35.761	330	0	30.521	8213700	6
O61347	FTH1	Ferritin OS=Homo sapiens OX=9606	6	5	5	5	30.7	30.7	30.7	17.653	153	0	37.098	12478000	6
O61348	RACK1	Receptor of-activated protein C kinase 1 (Fragment) OS=Homo sapiens OX=9606	19	5	5	5	33.3	33.3	33.3	21.934	198	0	46.362	21586000	7
O61349	REXO2	Oligoribonuclease, mitochondrial OS=Homo sapiens OX=9606	4	5	5	5	34.6	34.6	34.6	21.848	188	0	46.843	18678000	5
O61350	NAP1L1	Nucleosome assembly protein 1-like 1 (Fragment) OS=Homo sapiens OX=9606	16	7	5	5	34.8	29.8	29.8	23.417	198	0	40.304	53536000	8
O61351	PSME2	Proteasome activator complex subunit 2 OS=Homo sapiens OX=9606	4	5	5	5	25	25	25	26.011	228	0	37.798	8804300	6
O61352	SULT1A1	Sulfotransferase (Fragment) OS=Homo sapiens OX=9606	7	7	7	5	31.7	31.7	21.7	32.625	281	0	46.354	10818000	7
O61353	CYB5B	Cytochrome b5 type B OS=Homo sapiens OX=9606	5	5	5	5	55.7	55.7	55.7	15.716	140	0	37.008	79394000	10
O61354	SLC25A11	Mitochondrial 2-oxoglutarate/malate carrier protein (Fragment) OS=Homo sapiens OX=9606	2	5	5	5	22	22	22	32.182	296	0	43.158	9428900	9
O61355	CRK	Adapter molecule crk OS=Homo sapiens OX=9606	2	5	5	5	36.3	36.3	36.3	25.503	223	0	30.416	7435900	4
O61356	RPS15A	40S ribosomal protein S15a OS=Homo sapiens OX=9606	8	5	5	5	40	40	40	11.477	100	0	31.14	33620000	10
O61357	RPL18A	60S ribosomal protein L18a (Fragment) OS=Homo sapiens OX=9606	5	5	5	5	40.4	40.4	40.4	16.714	141	0	33.691	20798000	5
O61358	EGFR	Receptor protein-tyrosine kinase OS=Homo sapiens OX=9606	11	5	5	5	5.5	5.5	5.5	120.69	1091	0	32.165	5168300	5
O61359	NQO2	Ribosyldihydronicotinamide dehydrogenase [quinone] OS=Homo sapiens OX=9606	4	5	5	5	30.1	30.1	30.1	21.537	193	0	37.179	16699000	7
O61360	MTHFD1	C-1-tetrahydrofolate synthase, cytoplasmic OS=Homo sapiens OX=9606	6	5	5	5	6.3	6.3	6.3	92.569	854	0	33.001	6549300	4
O61361	SCAMP3	Secretory carrier-associated membrane protein 3 OS=Homo sapiens OX=9606	1	6	6	6	22.2	22.2	22.2	38.287	347	0	44.718	13646000	7
O61362	P4HA2	Prolyl 4-hydroxylase subunit alpha-2 OS=Homo sapiens OX=9606	9	6	6	6	16.4	16.4	16.4	60.901	535	0	47.438	11001000	7
O61363	PLOD3	Multifunctional procollagen lysine hydroxylase and glycosyltransferase LH3 OS=Homo sapiens OX=9606	5	6	6	6	10	10	10	84.784	738	0	41.232	15392000	9
O61364	NPM1	Nucleophosmin OS=Homo sapiens OX=9606	3	6	6	6	22.4	22.4	22.4	32.575	294	0	54.577	29949000	8
O61365	TPT1	Translationally-controlled tumor protein OS=Homo sapiens OX=9606	8	6	6	6	38.4	38.4	38.4	19.595	172	0	44.301	50735000	10
O61366	LGALS3	Galectin-3 OS=Homo sapiens OX=9606	2	6	6	6	28.4	28.4	28.4	26.152	250	0	43.44	19364000	7
O61367	AHCY	Adenosylhomocysteinase OS=Homo sapiens OX=9606	1	6	6	6	15.5	15.5	15.5	47.716	432	0	48.523	7760100	4
O61368	RPS12	40S ribosomal protein S12 OS=Homo sapiens OX=9606	1	6	6	6	52.3	52.3	52.3	14.515	132	0	55.448	20676000	7
O61369	PSMB4	Proteasome subunit beta type-4 OS=Homo sapiens OX=9606	1	6	6	6	19.3	19.3	19.3	29.204	264	0	41.053	26083000	7
O61370	BLVRB	Flavin reductase (NADPH) OS=Homo sapiens OX=9606	5	6	6	6	41.7	41.7	41.7	22.119	206	0	43.315	22822000	9
O61371	PRDX5	Peroxiredoxin-5, mitochondrial OS=Homo sapiens OX=9606	1	6	6	6	33.2	33.2	33.2	22.086	214	0	43.069	25819000	9
O61372	L1CAM	Neural cell adhesion molecule L1 OS=Homo sapiens OX=9606	4	6	6	6	5.3	5.3	5.3	140	1257	0	34.922	8634400	5
O61373	RPL22	60S ribosomal protein L22 OS=Homo sapiens OX=9606	10	6	6	6	57	57	57	14.787	128	0	42.31	37589000	9
O61374	MAP2K2	Dual specificity mitogen-activated protein kinase kinase 2 OS=Homo sapiens OX=9606	5	6	6	6	16.2	16.2	16.2	44.424	400	0	40.052	7393200	5
O61375	RPS19	40S ribosomal protein S19 OS=Homo sapiens OX=9606	6	6	6	6	40.7	40.7	40.7	16.06	145	0	38.597	15416000	5
O61376	LSS	Lanosterol synthase OS=Homo sapiens OX=9606	4	6	6	6	11.5	11.5	11.5	83.308	732	0	40.025	9693800	7
O61377	TMED10	Transmembrane emp24 domain-containing protein 10 OS=Homo sapiens OX=9606	2	6	6	6	31.1	31.1	31.1	24.976	219	0	52.398	39612000	8
O61378	ACLY	ATP-citrate synthase OS=Homo sapiens OX=9606	1	6	6	6	8.5	8.5	8.5	120.84	1101	0	40.537	5224300	4
O61379	RARS1	Arginine--tRNA ligase, cytoplasmic OS=Homo sapiens OX=9606	3	6	6	6	10.8	10.8	10.8	75.378	660	0	44.089	14058000	9
O61380	ATP1B3	Sodium/potassium-transporting ATPase subunit beta-3 OS=Homo sapiens OX=9606	6	6	6	6	33.7	33.7	33.7	31.512	279	0	41.572	21118000	9
O61381	RPS20	40S ribosomal protein S20 OS=Homo sapiens OX=9606	4	6	6	6	44.5	44.5	44.5	13.373	119	0	39.414	31285000	8
O61382	RAP1B	Ras-related protein Rap-1b OS=Homo sapiens OX=9606	21	6	6	6	34.8	34.8	34.8	20.825	184	0	44.265	51835000	9
O61383	RPL27	60S ribosomal protein L27 OS=Homo sapiens OX=9606	4	6	6	6	30.1	30.1	30.1	15.798	136	0	36.013	13271000	4
O61384	RPS13	40S ribosomal protein S13 OS=Homo sapiens OX=9606	3	6	6	6	28.5	28.5	28.5	17.222	151	0	41.767	14975000	6
O61385	PSMC6	26S proteasome regulatory subunit 10B OS=Homo sapiens OX=9606	4	6	6	6	22.4	22.4	22.4	44.172	389	0	41.359	21497000	8
O61386	RAC1	Ras-related C3 botulinum toxin substrate 1 OS=Homo sapiens OX=9606	8	7	7	6	37	37	31.2	21.45	192	0	45.111	25581000	9
O61387	ACTA1	Actin, alpha skeletal muscle OS=Homo sapiens OX=9606	8	29	6	6	45.1	15.4	15.4	42.051	377	0	85.337	281510000	11
O61388	TUBB4B	Tubulin beta-4B chain OS=Homo sapiens OX=9606	14	26	26	6	55.1	55.1	17.3	49.83	445	0	249.18	271340000	51
O61389	BASP1	Brain acid soluble protein 1 OS=Homo sapiens OX=9606	1	6	6	6	57.3	57.3	57.3	22.693	227	0	61.011	40478000	7
O61390	GLO1	Lactoylglutathione lyase OS=Homo sapiens OX=9606	1	6	6	6	26.6	26.6	26.6	20.777	184	0	37.924	45558000	10
O61391	YWHAH	14-3-3 protein eta OS=Homo sapiens OX=9606	4	8	6	6	27.6	23.6	23.6	28.218	246	0	52.706	33852000	8
O61392	ILF3	Interleukin enhancer-binding factor 3 OS=Homo sapiens OX=9606	8	6	6	6	8.2	8.2	8.2	95.337	894	0	36.536	8176600	8
O61393	LMAN2	Vesicular integral-membrane protein VIP36 OS=Homo sapiens OX=9606	5	6	6	6	12.9	12.9	12.9	40.228	356	0	40.556	14928000	8
O61394	SELENBP1	Methanethiol oxidase OS=Homo sapiens OX=9606	6	6	6	6	21.6	21.6	21.6	52.39	472	0	42.697	12285000	6
O61395	QPRT	Nicotinate-nucleotide pyrophosphorylase [carboxylating] OS=Homo sapiens OX=9606	2	6	6	6	24.2	24.2	24.2	30.845	297	0	40.257	30283000	8
O61396	RCN1	Reticulocalbin-1 OS=Homo sapiens OX=9606	2	6	6	6	22.7	22.7	22.7	38.89	331	0	49.093	22045000	8
O61397	ELOB	Elongin-B OS=Homo sapiens OX=9606	4	6	6	6	38.1	38.1	38.1	13.133	118	0	39.667	19198000	9
O61398	EEF1A1P5	Putative elongation factor 1-alpha-like 3 OS=Homo sapiens OX=9606	6	13	13	6	28.6	28.6	11.7	50.184	462	0	102.03	380370000	40
O61399	NCEH1	Neutral cholesterol ester hydrolase 1 OS=Homo sapiens OX=9606	4	6	6	6	15	15	15	45.807	408	0	35.881	9555100	6
O61400	SERBP1	Plasminogen activator inhibitor 1 RNA-binding protein OS=Homo sapiens OX=9606	1	6	6	6	15.4	15.4	15.4	44.965	408	0	41.227	10173000	6
O61401	ANP32B	Acidic leucine-rich nuclear phosphoprotein 32 family member B OS=Homo sapiens OX=9606	1	7	6	6	20.3	17.5	17.5	28.787	251	0	37.801	42767000	12
O61402	MYDGF	Myeloid-derived growth factor OS=Homo sapiens OX=9606	3	6	6	6	32.9	32.9	32.9	18.795	173	0	43.287	48664000	9
O61403	ERGIC1	Endoplasmic reticulum-Golgi intermediate compartment protein 1 OS=Homo sapiens OX=9606	3	6	6	6	21.4	21.4	21.4	32.592	290	0	37.055	13610000	5
O61404	GLOD4	Glyoxalase domain-containing protein 4 OS=Homo sapiens OX=9606	9	6	6	6	18.2	18.2	18.2	34.793	313	0	41.077	10353000	6
O61405	CHORDC1	Cysteine and histidine-rich domain-containing protein 1 OS=Homo sapiens OX=9606	5	6	6	6	18.7	18.7	18.7	37.489	332	0	44.763	8585600	6
O61406	CDK1	Cell division cycle 2, G1 to S and G2 to M, isoform CRA_a OS=Homo sapiens OX=9606	34	7	7	6	26.6	26.6	23.9	34.081	297	0	47.606	23429000	8
O61407	PSMA2	Proteasome subunit alpha type OS=Homo sapiens OX=9606	3	6	6	6	26.5	26.5	26.5	25.898	234	0	41.526	67751000	9
O61408	TPM3	Tropomyosin alpha-3 chain OS=Homo sapiens OX=9606	9	12	12	6	52	52	30.4	26.42	227	0	96.818	52204000	15
O61409	RPS14	40S ribosomal protein S14 (Fragment) OS=Homo sapiens OX=9606	3	6	6	6	26.7	26.7	26.7	16.159	150	0	52.507	23328000	10
O61410	SUMF2	Inactive C-alpha-formylglycine-generating enzyme 2 OS=Homo sapiens OX=9606	14	6	6	6	19.2	19.2	19.2	31.915	286	0	42.574	21752000	6
O61411	NQO1	NAD(P)H dehydrogenase [quinone] 1 OS=Homo sapiens OX=9606	4	6	6	6	26.2	26.2	26.2	22.793	202	0	44.039	15585000	8
O61412	PSPH	O-phosphoserine phosphohydrolase (Fragment) OS=Homo sapiens OX=9606	2	6	6	6	30.5	30.5	30.5	20.745	187	0	38.362	32526000	6
O61413	PTGR1	15-oxoprostaglandin 13-reductase OS=Homo sapiens OX=9606	4	6	6	6	26.7	26.7	26.7	32.729	300	0	44.309	11580000	8
O61414	AK2	Nucleoside-diphosphate kinase OS=Homo sapiens OX=9606	6	6	6	6	43.7	43.7	43.7	21.226	190	0	39.864	18651000	9
O61415	MYL6	Myosin light polypeptide 6 OS=Homo sapiens OX=9606	14	6	6	6	49.7	49.7	49.7	16.29	145	0	56.554	22706000	6
O61416	HNRNPA1	Helix-destabilizing protein OS=Homo sapiens OX=9606	9	6	6	6	32.9	32.9	32.9	33.155	307	0	44.593	21362000	9
O61417	HNRNPD	Heterogeneous nuclear ribonucleoprotein D0 (Fragment) OS=Homo sapiens OX=9606	7	6	6	6	32.9	32.9	32.9	23.811	210	0	40.776	20965000	12
O61418	TKFC	ATP-dependent dihydroxyacetone kinase (Fragment) OS=Homo sapiens OX=9606	4	6	6	6	14.6	14.6	14.6	54.661	533	0	41.98	6602800	5
O61419	HEXA	Beta-hexosaminidase OS=Homo sapiens OX=9606	6	6	6	6	13.9	13.9	13.9	58.44	509	0	40.108	12352000	6
O61420	RPL19	Ribosomal protein L19 OS=Homo sapiens OX=9606	3	6	6	6	27.5	27.5	27.5	23.134	193	0	45.482	15549000	6
O61421	NME1-NME2	Nucleoside diphosphate kinase OS=Homo sapiens OX=9606	8	15	15	6	66.4	66.4	24.7	32.642	292	0	121.19	130540000	30
O61422	PSMC3	26S proteasome regulatory subunit 6A OS=Homo sapiens OX=9606	7	6	6	6	18.4	18.4	18.4	47.352	423	0	38.905	10440000	7
O61423	PGRMC1	Membrane-associated progesterone receptor component 1 OS=Homo sapiens OX=9606	1	7	7	7	32.3	32.3	32.3	21.671	195	0	55.459	22395000	10
O61424	SLC9A3R1	Na(+)/H(+) exchange regulatory cofactor NHE-RF1 OS=Homo sapiens OX=9606	3	7	7	7	23.2	23.2	23.2	38.868	358	0	44.221	12477000	4
O61425	TPD52L2	Tumor protein D54 OS=Homo sapiens OX=9606	3	7	7	7	40.3	40.3	40.3	22.237	206	0	72.935	28671000	10
O61426	SOD1	Superoxide dismutase [Cu-Zn] OS=Homo sapiens OX=9606	2	7	7	7	82.5	82.5	82.5	15.936	154	0	65.18	17153000	6
O61427	GSTP1	Glutathione S-transferase P OS=Homo sapiens OX=9606	5	7	7	7	48.1	48.1	48.1	23.356	210	0	58.86	46109000	9
O61428	APEH	Acylamino-acid-releasing enzyme OS=Homo sapiens OX=9606	6	7	7	7	10.1	10.1	10.1	81.224	732	0	47.343	18471000	8
O61429	RPS2	40S ribosomal protein S2 OS=Homo sapiens OX=9606	7	7	7	7	25.9	25.9	25.9	31.324	293	0	45.102	24331000	8
O61430	CBR1	Carbonyl reductase [NADPH] 1 OS=Homo sapiens OX=9606	3	10	10	7	53.1	53.1	39.7	30.375	277	0	89.096	23049000	10
O61431	PSMA4	Proteasome subunit alpha type-4 OS=Homo sapiens OX=9606	11	7	7	7	29.1	29.1	29.1	29.483	261	0	50.881	29032000	7
O61432	RPL13	60S ribosomal protein L13 OS=Homo sapiens OX=9606	5	7	7	7	34.6	34.6	34.6	24.261	211	0	47.02	12531000	8
O61433	STOM	Stomatin OS=Homo sapiens OX=9606	2	7	7	7	32.6	32.6	32.6	31.73	288	0	51.524	16901000	7
O61434	PSMA5	Proteasome subunit alpha type-5 OS=Homo sapiens OX=9606	1	7	7	7	30.7	30.7	30.7	26.411	241	0	51.24	41867000	10
O61435	BSG	Basigin OS=Homo sapiens OX=9606	7	7	7	7	23.1	23.1	23.1	42.2	385	0	70.342	14441000	7
O61436	CAPG	Macrophage-capping protein OS=Homo sapiens OX=9606	4	7	7	7	23	23	23	38.498	348	0	51.388	32254000	6
O61437	RPL13A	60S ribosomal protein L13a OS=Homo sapiens OX=9606	4	7	7	7	24.6	24.6	24.6	23.577	203	0	45.525	25230000	9
O61438	RPL35	60S ribosomal protein L35 OS=Homo sapiens OX=9606	2	7	7	7	39	39	39	14.551	123	0	50.949	30857000	7
O61439	MCAM	Cell surface glycoprotein MUC18 OS=Homo sapiens OX=9606	1	7	7	7	18.3	18.3	18.3	71.607	646	0	49.642	16382000	8
O61440	PSMC4	26S proteasome regulatory subunit 6B OS=Homo sapiens OX=9606	1	7	7	7	25.6	25.6	25.6	47.366	418	0	51.133	11553000	9
O61441	DSTN	Destrin OS=Homo sapiens OX=9606	2	8	7	7	41.2	34.5	34.5	18.506	165	0	49.2	42717000	10
O61442	UBE2K	Ubiquitin-conjugating enzyme E2 K OS=Homo sapiens OX=9606	2	7	7	7	36	36	36	22.406	200	0	48.185	27096000	8
O61443	PSMC5	26S proteasome regulatory subunit 8 OS=Homo sapiens OX=9606	9	7	7	7	23.2	23.2	23.2	45.626	406	0	47.733	11713000	7
O61444	HMGCS1	Hydroxymethylglutaryl-CoA synthase, cytoplasmic OS=Homo sapiens OX=9606	2	7	7	7	23.1	23.1	23.1	57.293	520	0	67.402	18835000	9
O61445	PPAT	Amidophosphoribosyltransferase OS=Homo sapiens OX=9606	3	7	7	7	17.2	17.2	17.2	57.398	517	0	48.131	15725000	6
O61446	CKAP4	Cytoskeleton-associated protein 4 OS=Homo sapiens OX=9606	1	7	7	7	17.6	17.6	17.6	66.022	602	0	48.366	6545300	7
O61447	IL18	Interleukin-18 OS=Homo sapiens OX=9606	1	7	7	7	37.8	37.8	37.8	22.326	193	0	49.28	59060000	7
O61448	MAPRE1	Microtubule-associated protein RP/EB family member 1 OS=Homo sapiens OX=9606	1	7	7	7	31.3	31.3	31.3	29.999	268	0	52.086	16932000	10
O61449	COLGALT1	Procollagen galactosyltransferase 1 OS=Homo sapiens OX=9606	3	7	7	7	12.7	12.7	12.7	71.635	622	0	49.766	18223000	9
O61450	LPCAT1	Lysophosphatidylcholine acyltransferase 1 OS=Homo sapiens OX=9606	3	7	7	7	13.3	13.3	13.3	59.151	534	0	47.855	11921000	6
O61451	PGM2	Phosphoglucomutase-2 OS=Homo sapiens OX=9606	4	7	7	7	18.1	18.1	18.1	68.283	612	0	44.77	13338000	6
O61452	TSNAX	Translin-associated protein X OS=Homo sapiens OX=9606	6	7	7	7	31.7	31.7	31.7	33.112	290	0	60.493	22752000	8
O61453	NIF3L1	NIF3-like protein 1 OS=Homo sapiens OX=9606	6	7	7	7	23.6	23.6	23.6	41.968	377	0	49.951	19335000	11
O61454	HEBP1	Heme-binding protein 1 OS=Homo sapiens OX=9606	4	7	7	7	46.6	46.6	46.6	21.097	189	0	51.731	19726000	10
O61455	NUDT5	ADP-sugar pyrophosphatase OS=Homo sapiens OX=9606	6	7	7	7	28.8	28.8	28.8	24.327	219	0	64.638	16528000	7
O61456	NSFL1C	NSFL1 cofactor p47 OS=Homo sapiens OX=9606	3	7	7	7	27.8	27.8	27.8	40.572	370	0	49.243	22311000	8
O61457	STRAP	Serine-threonine kinase receptor-associated protein OS=Homo sapiens OX=9606	2	7	7	7	31.4	31.4	31.4	38.438	350	0	51.404	15378000	9
O61458	VDAC2	Outer mitochondrial membrane protein porin 2 (Fragment) OS=Homo sapiens OX=9606	5	7	7	7	31.9	31.9	31.9	30.348	282	0	55.513	33146000	8
O61459	RPSA	40S ribosomal protein SA (Fragment) OS=Homo sapiens OX=9606	4	7	7	7	38	38	38	29.404	263	0	61.111	30649000	9
O61460	CCT5	T-complex protein 1 subunit epsilon OS=Homo sapiens OX=9606	4	7	7	7	19.1	19.1	19.1	53.848	486	0	47.473	17670000	10
O61461	EEF1D	Elongation factor 1-delta (Fragment) OS=Homo sapiens OX=9606	19	7	7	7	54.8	54.8	54.8	18.157	166	0	60.197	23410000	10
O61462	HNRNPC	Heterogeneous nuclear ribonucleoproteins C1/C2 OS=Homo sapiens OX=9606	23	7	7	7	22.9	22.9	22.9	25.256	231	0	49.02	17066000	8
O61463	RPL18	60S ribosomal protein L18 (Fragment) OS=Homo sapiens OX=9606	7	7	7	7	43.7	43.7	43.7	18.863	167	0	54.476	42048000	10
O61464	DUT	Deoxyuridine 5'-triphosphate nucleotidohydrolase OS=Homo sapiens OX=9606	8	7	7	7	49.1	49.1	49.1	17.827	167	0	56.999	15672000	7
O61465	RAB11A	Ras-related protein Rab-11A (Fragment) OS=Homo sapiens OX=9606	5	7	7	7	44.5	44.5	44.5	17.668	155	0	48.149	72858000	10
O61466	UBB	Polyubiquitin-B (Fragment) OS=Homo sapiens OX=9606	24	7	7	7	52.7	52.7	52.7	10.469	93	0	74.14	125540000	13
O61467	RPS11	40S ribosomal protein S11 OS=Homo sapiens OX=9606	4	7	7	7	50.8	50.8	50.8	13.997	118	0	43.496	14107000	6
O61468	RPS8	40S ribosomal protein S8 OS=Homo sapiens OX=9606	2	7	7	7	44.7	44.7	44.7	21.879	188	0	50.857	26581000	9
O61469	XPNPEP1	Xaa-Pro aminopeptidase 1 OS=Homo sapiens OX=9606	4	7	7	7	14.3	14.3	14.3	62.138	552	0	45.822	25724000	8
O61470	AHSA1	Activator of 90 kDa heat shock protein ATPase homolog 1 OS=Homo sapiens OX=9606	6	8	8	8	28.4	28.4	28.4	38.274	338	0	56.219	21637000	9
O61471	GOT2	Aspartate aminotransferase, mitochondrial OS=Homo sapiens OX=9606	1	8	8	8	27	27	27	47.517	430	0	57.318	34789000	7
O61472	CAPN1	Calpain-1 catalytic subunit OS=Homo sapiens OX=9606	11	8	8	8	13.3	13.3	13.3	81.889	714	0	49.228	13894000	7
O61473	HEXB	Beta-hexosaminidase subunit beta OS=Homo sapiens OX=9606	5	8	8	8	15.6	15.6	15.6	63.111	556	0	63.728	37543000	12
O61474	ACTN1	Alpha-actinin-1 OS=Homo sapiens OX=9606	7	24	8	8	30.9	13.6	13.6	103.06	892	0	66.767	19280000	9
O61475	POR	NADPH--cytochrome P450 reductase OS=Homo sapiens OX=9606	4	8	8	8	14.3	14.3	14.3	76.689	677	0	54.038	7398400	7
O61476	SRM	Spermidine synthase OS=Homo sapiens OX=9606	5	8	8	8	24.2	24.2	24.2	33.824	302	0	56.391	32560000	11
O61477	CFL1	Cofilin-1 OS=Homo sapiens OX=9606	8	14	14	8	64.5	64.5	39.2	18.502	166	0	122.34	336960000	31
O61478	PSMA3	Proteasome subunit alpha type-3 OS=Homo sapiens OX=9606	5	8	8	8	32.2	32.2	32.2	28.433	255	0	58.146	71873000	15
O61479	RPL10	60S ribosomal protein L10 OS=Homo sapiens OX=9606	9	8	8	8	34.1	34.1	34.1	24.604	214	0	54.04	36859000	14
O61480	ERP29	Endoplasmic reticulum resident protein 29 OS=Homo sapiens OX=9606	3	8	8	8	38.3	38.3	38.3	28.993	261	0	61.378	64493000	12
O61481	LRPAP1	Alpha-2-macroglobulin receptor-associated protein OS=Homo sapiens OX=9606	2	8	8	8	27.5	27.5	27.5	41.465	357	0	57.188	13065000	9
O61482	MAT2A	S-adenosylmethionine synthase isoform type-2 OS=Homo sapiens OX=9606	2	8	8	8	25.1	25.1	25.1	43.66	395	0	57.676	22485000	10
O61483	PRDX2	Peroxiredoxin-2 OS=Homo sapiens OX=9606	2	9	8	8	49.5	43.9	43.9	21.892	198	0	47.567	12320000	9
O61484	ST13	Hsc70-interacting protein OS=Homo sapiens OX=9606	7	8	8	8	24.1	24.1	24.1	41.331	369	0	57.291	20177000	13
O61485	UBE2N	Ubiquitin-conjugating enzyme E2 N OS=Homo sapiens OX=9606	6	8	8	8	61.2	61.2	61.2	17.138	152	0	59.2	47326000	11
O61486	PSMC1	26S proteasome regulatory subunit 4 OS=Homo sapiens OX=9606	1	8	8	8	18.6	18.6	18.6	49.184	440	0	52.786	24825000	7
O61487	BLMH	Bleomycin hydrolase OS=Homo sapiens OX=9606	6	8	8	8	24.4	24.4	24.4	52.562	455	0	62.485	33634000	8
O61488	COTL1	Coactosin-like protein OS=Homo sapiens OX=9606	2	8	8	8	65.5	65.5	65.5	15.945	142	0	66.908	14792000	8
O61489	UAP1	UDP-N-acetylhexosamine pyrophosphorylase OS=Homo sapiens OX=9606	1	8	8	8	16.3	16.3	16.3	58.768	522	0	53.122	17744000	9
O61490	CDC37	Hsp90 co-chaperone Cdc37 OS=Homo sapiens OX=9606	5	8	8	8	35.4	35.4	35.4	44.468	378	0	52.315	19380000	6
O61491	FSCN1	Fascin OS=Homo sapiens OX=9606	4	8	8	8	19.3	19.3	19.3	54.529	493	0	61.837	57041000	11
O61492	TMEM43	Transmembrane protein 43 OS=Homo sapiens OX=9606	2	8	8	8	32.5	32.5	32.5	44.875	400	0	57.117	24321000	10
O61493	PTGES2	Prostaglandin E synthase 2 OS=Homo sapiens OX=9606	3	8	8	8	37.9	37.9	37.9	41.943	377	0	54.568	27596000	8
O61494	RPL17	60S ribosomal protein L17 (Fragment) OS=Homo sapiens OX=9606	12	8	8	8	43.8	43.8	43.8	19.586	169	0	61.906	13114000	9
O61495	HARS1	Histidine--tRNA ligase OS=Homo sapiens OX=9606	11	8	8	8	22	22	22	49.623	440	0	48.703	6433000	8
O61496	EZR	Ezrin OS=Homo sapiens OX=9606	2	16	8	8	24.7	16.6	16.6	69.371	586	0	61.176	22027000	10
O61497	TXNRD1	Thioredoxin-disulfide reductase OS=Homo sapiens OX=9606	13	8	8	8	19.3	19.3	19.3	53.166	482	0	64.787	38634000	13
O61498	ARHGDIA	Rho GDP-dissociation inhibitor 1 (Fragment) OS=Homo sapiens OX=9606	6	8	8	8	49.2	49.2	49.2	21.517	193	0	80.398	42513000	9
O61499	RPL26	60S ribosomal protein L26 (Fragment) OS=Homo sapiens OX=9606	10	8	8	8	62.6	62.6	62.6	12.63	107	0	49.939	26863000	8
O61500	PGLS	6-phosphogluconolactonase OS=Homo sapiens OX=9606	4	9	9	9	59.3	59.3	59.3	27.547	258	0	69.768	37566000	18
O61501	CYB5R3	NADH-cytochrome b5 reductase 3 OS=Homo sapiens OX=9606	2	9	9	9	35.2	35.2	35.2	34.234	301	0	58.961	48418000	10
O61502	PNP	Purine nucleoside phosphorylase OS=Homo sapiens OX=9606	4	9	9	9	50.5	50.5	50.5	32.118	289	0	68.909	38223000	13
O61503	HSPB1	Heat shock protein beta-1 OS=Homo sapiens OX=9606	3	9	9	9	45.4	45.4	45.4	22.782	205	0	95.309	78853000	20
O61504	APRT	Adenine phosphoribosyltransferase OS=Homo sapiens OX=9606	5	9	9	9	61.7	61.7	61.7	19.608	180	0	77.76	103000000	14
O61505	LGALS1	Galectin-1 OS=Homo sapiens OX=9606	2	9	9	9	67.4	67.4	67.4	14.716	135	0	85.429	17116000	6
O61506	UMPS	Uridine 5'-monophosphate synthase OS=Homo sapiens OX=9606	5	9	9	9	25.6	25.6	25.6	52.221	480	0	62.191	19697000	10
O61507	FDPS	Farnesyl pyrophosphate synthase OS=Homo sapiens OX=9606	5	9	9	9	26.7	26.7	26.7	48.275	419	0	76.526	112730000	14
O61508	VDAC1	Voltage-dependent anion-selective channel protein 1 OS=Homo sapiens OX=9606	2	9	9	9	33.6	33.6	33.6	30.772	283	0	63.833	32046000	15
O61509	RPS3	40S ribosomal protein S3 OS=Homo sapiens OX=9606	12	9	9	9	40.7	40.7	40.7	26.688	243	0	57.286	21608000	12
O61510	ATP5F1A	ATP synthase subunit alpha, mitochondrial OS=Homo sapiens OX=9606	24	9	9	9	21.7	21.7	21.7	59.75	553	0	67.043	14804000	7
O61511	PPP2R1A	Serine/threonine-protein phosphatase 2A 65 kDa regulatory subunit A alpha isoform OS=Homo sapiens OX=9606	7	13	13	9	32.3	32.3	21.7	65.308	589	0	108.92	60930000	14
O61512	SERPINB1	Leukocyte elastase inhibitor OS=Homo sapiens OX=9606	1	9	9	9	29.3	29.3	29.3	42.741	379	0	72.402	23350000	10
O61513	CCT6A	T-complex protein 1 subunit zeta OS=Homo sapiens OX=9606	2	9	9	9	23.5	23.5	23.5	58.024	531	0	62.441	22019000	8
O61514	HDGF	Hepatoma-derived growth factor OS=Homo sapiens OX=9606	7	9	9	9	61.7	61.7	61.7	26.788	240	0	90.562	37703000	15
O61515	CAPZA1	F-actin-capping protein subunit alpha-1 OS=Homo sapiens OX=9606	1	11	11	9	50	50	44.4	32.922	286	0	79.019	68171000	15
O61516	USP14	Ubiquitin carboxyl-terminal hydrolase 14 OS=Homo sapiens OX=9606	4	9	9	9	22.3	22.3	22.3	56.068	494	0	66.835	18714000	11
O61517	RPS16	40S ribosomal protein S16 OS=Homo sapiens OX=9606	6	9	9	9	52.1	52.1	52.1	16.445	146	0	56.647	19780000	10
O61518	RPL8	60S ribosomal protein L8 OS=Homo sapiens OX=9606	5	9	9	9	28	28	28	28.024	257	0	59.479	41981000	13
O61519	CAP1	Adenylyl cyclase-associated protein 1 OS=Homo sapiens OX=9606	10	17	17	9	41.9	41.9	23.6	51.901	475	0	126.22	82707000	19
O61520	NSUN2	RNA cytosine C(5)-methyltransferase NSUN2 OS=Homo sapiens OX=9606	2	9	9	9	12	12	12	86.47	767	0	57.363	14933000	11
O61521	PRDX4	Peroxiredoxin-4 OS=Homo sapiens OX=9606	4	11	9	9	53.9	49.4	49.4	30.54	271	0	71.326	42997000	13
O61522	NAXE	NAD(P)H-hydrate epimerase OS=Homo sapiens OX=9606	3	9	9	9	44.8	44.8	44.8	31.674	288	0	79.19	35089000	13
O61523	DCPS	m7GpppX diphosphatase OS=Homo sapiens OX=9606	2	9	9	9	29.1	29.1	29.1	38.608	337	0	62.052	26354000	12
O61524	NAP1L4	Nucleosome assembly protein 1-like 4 OS=Homo sapiens OX=9606	13	11	11	9	33.6	33.6	30.9	42.823	375	0	98.105	63039000	16
O61525	CCT7	T-complex protein 1 subunit eta OS=Homo sapiens OX=9606	2	9	9	9	17.5	17.5	17.5	59.366	543	0	58.194	20178000	10
O61526	CACYBP	Calcyclin-binding protein OS=Homo sapiens OX=9606	2	9	9	9	50.9	50.9	50.9	26.21	228	0	87.075	24507000	10
O61527	SAE1	SUMO-activating enzyme subunit 1 OS=Homo sapiens OX=9606	7	9	9	9	36.4	36.4	36.4	38.449	346	0	66.541	22416000	11
O61528	NUDC	Nuclear migration protein nudC OS=Homo sapiens OX=9606	3	9	9	9	23.9	23.9	23.9	38.242	331	0	63.947	6748300	6
O61529	GDA	Guanine deaminase OS=Homo sapiens OX=9606	3	29	29	9	82.2	82.2	20.5	51.002	454	0	298.62	281370000	52
O61530	MTCH2	Mitochondrial carrier homolog 2 OS=Homo sapiens OX=9606	2	9	9	9	34	34	34	33.331	303	0	69.276	90046000	16
O61531	PSMB3	Proteasome chain 13 (Fragment) OS=Homo sapiens OX=9606	4	9	9	9	62.8	62.8	62.8	16.161	145	0	60.903	27674000	11
O61532	ACY1	N-acyl-L-amino-acid amidohydrolase OS=Homo sapiens OX=9606	13	9	9	9	34.9	34.9	34.9	42.179	373	0	70.391	37621000	12
O61533	RPL7	60S ribosomal protein L7 OS=Homo sapiens OX=9606	4	9	9	9	39.4	39.4	39.4	24.433	208	0	63.982	89432000	12
O61534	TSN	Component 3 of promoter of RISC OS=Homo sapiens OX=9606	3	9	9	9	53.8	53.8	53.8	25.572	223	0	72.258	27251000	10
O61535	ANP32A	Acidic leucine-rich nuclear phosphoprotein 32 family member A OS=Homo sapiens OX=9606	5	10	10	9	39.5	39.5	35.6	19.997	177	0	92.54	44882000	13
O61536	PARK7	Parkinson disease protein 7 OS=Homo sapiens OX=9606	3	9	9	9	59.8	59.8	59.8	17.91	169	0	77.552	54330000	14
O61537	PSMD11	26S proteasome non-ATPase regulatory subunit 11 OS=Homo sapiens OX=9606	3	10	10	10	31.5	31.5	31.5	47.463	422	0	63.441	24244000	13
O61538	IDH1	Isocitrate dehydrogenase [NADP] cytoplasmic OS=Homo sapiens OX=9606	5	10	10	10	26.6	26.6	26.6	46.659	414	0	67.326	18384000	15
O61539	HNRNPA2B1	Heterogeneous nuclear ribonucleoproteins A2/B1 OS=Homo sapiens OX=9606	2	10	10	10	37.1	37.1	37.1	37.429	353	0	79.182	65098000	10
O61540	EEF1G	Elongation factor 1-gamma OS=Homo sapiens OX=9606	1	10	10	10	21.3	21.3	21.3	50.118	437	0	67.815	35541000	9
O61541	PEBP1	Phosphatidylethanolamine-binding protein 1 OS=Homo sapiens OX=9606	1	10	10	10	76.5	76.5	76.5	21.057	187	0	89.706	33201000	12
O61542	KRT9	Keratin, type I cytoskeletal 9 OS=Homo sapiens OX=9606	3	10	10	10	19.3	19.3	19.3	62.064	623	0	87.489	38080000	13
O61543	KRT2	Keratin, type II cytoskeletal 2 epidermal OS=Homo sapiens OX=9606	13	18	16	10	30.4	27.2	18.9	65.432	639	0	124.27	69453000	19
O61544	EIF2S3	Eukaryotic translation initiation factor 2 subunit 3 OS=Homo sapiens OX=9606	3	10	10	10	26.3	26.3	26.3	51.109	472	0	73.881	26707000	12
O61545	GDI2	Rab GDP dissociation inhibitor beta OS=Homo sapiens OX=9606	8	17	17	10	50.8	50.8	33	50.663	445	0	125.83	81755000	25
O61546	CCT4	T-complex protein 1 subunit delta OS=Homo sapiens OX=9606	1	10	10	10	22.1	22.1	22.1	57.924	539	0	70.333	21664000	7
O61547	RAB7A	Ras-related protein Rab-7a OS=Homo sapiens OX=9606	7	10	10	10	53.1	53.1	53.1	23.489	207	0	75.862	71640000	12
O61548	PSMA6	Proteasome subunit alpha type-6 OS=Homo sapiens OX=9606	8	10	10	10	41.1	41.1	41.1	27.399	246	0	72.988	120320000	16
O61549	SET	Protein SET OS=Homo sapiens OX=9606	4	10	10	10	43.4	43.4	43.4	33.488	290	0	102.88	140710000	24
O61550	SCCPDH	Saccharopine dehydrogenase-like oxidoreductase OS=Homo sapiens OX=9606	1	10	10	10	27.5	27.5	27.5	47.151	429	0	76.942	59233000	13
O61551	FKBP10	Peptidyl-prolyl cis-trans isomerase FKBP10 OS=Homo sapiens OX=9606	5	10	10	10	19.2	19.2	19.2	64.244	582	0	69.802	44571000	12
O61552	ERO1A	ERO1-like protein alpha OS=Homo sapiens OX=9606	5	10	10	10	27.8	27.8	27.8	54.392	468	0	88.487	21117000	11
O61553	PA2G4	Proliferation-associated protein 2G4 OS=Homo sapiens OX=9606	5	10	10	10	28.2	28.2	28.2	43.786	394	0	67.655	45197000	13
O61554	RPS9	#N/A	6	10	10	10	34.5	34.5	34.5	22.591	194	0	69.576	36098000	9
O61555	UGP2	UTP--glucose-1-phosphate uridylyltransferase OS=Homo sapiens OX=9606	10	10	10	10	23	23	23	56.967	508	0	67.107	34935000	11
O61556	HNRNPU	Heterogeneous nuclear ribonucleoprotein U (Fragment) OS=Homo sapiens OX=9606	14	10	10	10	17	17	17	80.648	728	0	72.347	34588000	13
O61557	CAPZB	F-actin-capping protein subunit beta OS=Homo sapiens OX=9606	4	10	10	10	52.3	52.3	52.3	29.295	260	0	79.34	58579000	12
O61558	RPLP0	60S acidic ribosomal protein P0 (Fragment) OS=Homo sapiens OX=9606	13	10	10	10	54.7	54.7	54.7	27.187	247	0	67.173	24338000	10
O61559	PCNA	Proliferating cell nuclear antigen OS=Homo sapiens OX=9606	1	11	11	11	38.7	38.7	38.7	28.768	261	0	93.128	86660000	19
O61560	FOLR1	Folate receptor alpha OS=Homo sapiens OX=9606	1	11	11	11	34.2	34.2	34.2	29.819	257	0	83.98	82148000	15
O61561	PSMB1	Proteasome subunit beta type-1 OS=Homo sapiens OX=9606	1	11	11	11	63.9	63.9	63.9	26.489	241	0	93.652	67176000	19
O61562	GSTM3	Glutathione S-transferase Mu 3 OS=Homo sapiens OX=9606	2	12	12	11	49.8	49.8	49.8	26.559	225	0	89.758	36304000	13
O61563	ACO1	Cytoplasmic aconitate hydratase OS=Homo sapiens OX=9606	1	11	11	11	15.9	15.9	15.9	98.398	889	0	81.041	14503000	13
O61564	MAP4	Microtubule-associated protein 4 OS=Homo sapiens OX=9606	7	11	11	11	14.1	14.1	14.1	121	1152	0	82.734	32478000	14
O61565	PSMB5	Proteasome subunit beta type-5 OS=Homo sapiens OX=9606	2	11	11	11	33.8	33.8	33.8	28.48	263	0	90.298	55970000	12
O61566	PSMC2	26S proteasome regulatory subunit 7 OS=Homo sapiens OX=9606	2	11	11	11	30	30	30	48.633	433	0	82.84	21391000	13
O61567	PSMB2	Proteasome subunit beta type-2 OS=Homo sapiens OX=9606	2	11	11	11	43.3	43.3	43.3	22.836	201	0	75.242	28767000	9
O61568	RPS3A	40S ribosomal protein S3a OS=Homo sapiens OX=9606	12	11	11	11	40.2	40.2	40.2	29.945	264	0	99.236	46021000	13
O61569	RPS18	40S ribosomal protein S18 OS=Homo sapiens OX=9606	4	11	11	11	59.2	59.2	59.2	17.718	152	0	78.352	36643000	12
O61570	GSTO1	Glutathione S-transferase omega-1 OS=Homo sapiens OX=9606	3	11	11	11	36.5	36.5	36.5	27.566	241	0	80.469	81901000	16
O61571	RPL6	60S ribosomal protein L6 OS=Homo sapiens OX=9606	7	11	11	11	38.9	38.9	38.9	32.728	288	0	82.814	31575000	11
O61572	DDB1	DNA damage-binding protein 1 OS=Homo sapiens OX=9606	7	11	11	11	12.3	12.3	12.3	126.97	1140	0	67.458	17914000	13
O61573	NAPRT	Nicotinate phosphoribosyltransferase OS=Homo sapiens OX=9606	6	11	11	11	28.4	28.4	28.4	57.578	538	0	83.421	29046000	15
O61574	SDF4	45 kDa calcium-binding protein OS=Homo sapiens OX=9606	3	11	11	11	29	29	29	41.806	362	0	72.724	17151000	9
O61575	ERP44	Endoplasmic reticulum resident protein 44 OS=Homo sapiens OX=9606	1	11	11	11	30.3	30.3	30.3	46.971	406	0	82.87	45887000	14
O61576	#N/A	#N/A	4	11	11	11	41.7	41.7	41.7	35.503	321	0	75.475	29093000	12
O61577	PHGDH	D-3-phosphoglycerate dehydrogenase OS=Homo sapiens OX=9606	14	11	11	11	20.9	20.9	20.9	55.938	526	0	79.416	24939000	15
O61578	GSS	Glutathione synthetase OS=Homo sapiens OX=9606	13	11	11	11	29.8	29.8	29.8	49.976	450	0	90.131	47534000	12
O61579	RPL5	60S ribosomal protein L5 (Fragment) OS=Homo sapiens OX=9606	4	11	11	11	51.3	51.3	51.3	27.045	238	0	76.017	32292000	12
O61580	CLIC1	Chloride intracellular channel protein 1 OS=Homo sapiens OX=9606	7	13	13	12	49.4	49.4	46.9	26.922	241	0	99.023	118930000	12
O61581	PSMA7	Proteasome subunit alpha type-7 OS=Homo sapiens OX=9606	5	12	12	12	46.4	46.4	46.4	27.887	248	0	89.763	82579000	18
O61582	PLIN3	Perilipin-3 OS=Homo sapiens OX=9606	4	12	12	12	40.1	40.1	40.1	47.074	434	0	115.21	60150000	16
O61583	HPRT1	Hypoxanthine-guanine phosphoribosyltransferase OS=Homo sapiens OX=9606	2	12	12	12	62.4	62.4	62.4	24.579	218	0	91.721	99994000	15
O61584	ASS1	Argininosuccinate synthase OS=Homo sapiens OX=9606	3	12	12	12	25	25	25	46.53	412	0	83.04	64067000	19
O61585	ALPL	Alkaline phosphatase, tissue-nonspecific isozyme OS=Homo sapiens OX=9606	3	12	12	12	33.8	33.8	33.8	57.304	524	0	89.225	54069000	23
O61586	ATP5F1B	ATP synthase subunit beta, mitochondrial OS=Homo sapiens OX=9606	5	12	12	12	36.7	36.7	36.7	56.559	529	0	92.221	56827000	17
O61587	P4HA1	Prolyl 4-hydroxylase subunit alpha-1 OS=Homo sapiens OX=9606	1	12	12	12	23.6	23.6	23.6	61.049	534	0	84.615	33462000	13
O61588	CAPN2	Calpain-2 catalytic subunit OS=Homo sapiens OX=9606	1	12	12	12	19.1	19.1	19.1	79.994	700	0	101.93	36463000	16
O61589	PSMA1	Proteasome subunit alpha type-1 OS=Homo sapiens OX=9606	3	12	12	12	41.1	41.1	41.1	29.555	263	0	100.77	73473000	21
O61590	ATIC	Bifunctional purine biosynthesis protein ATIC OS=Homo sapiens OX=9606	3	12	12	12	25.2	25.2	25.2	64.615	592	0	78.352	24117000	12
O61591	TAGLN2	Transgelin-2 OS=Homo sapiens OX=9606	4	12	12	12	65.8	65.8	65.8	22.391	199	0	101.84	45992000	13
O61592	TALDO1	Transaldolase OS=Homo sapiens OX=9606	2	12	12	12	35.9	35.9	35.9	37.54	337	0	89.034	63476000	14
O61593	MDH2	Malate dehydrogenase, mitochondrial OS=Homo sapiens OX=9606	2	12	12	12	44.4	44.4	44.4	35.503	338	0	154.46	92616000	20
O61594	KPNA2	Importin subunit alpha-1 OS=Homo sapiens OX=9606	3	12	12	12	34.6	34.6	34.6	57.861	529	0	90.895	33335000	15
O61595	RAB14	Ras-related protein Rab-14 OS=Homo sapiens OX=9606	2	12	12	12	58.6	58.6	58.6	23.897	215	0	86.452	22166000	10
O61596	HNRNPK	Heterogeneous nuclear ribonucleoprotein K OS=Homo sapiens OX=9606	4	12	12	12	32.2	32.2	32.2	50.976	463	0	91.478	31211000	14
O61597	YWHAG	14-3-3 protein gamma OS=Homo sapiens OX=9606	1	16	12	12	68.8	59.1	59.1	28.302	247	0	90.316	123050000	13
O61598	RPL7A	60S ribosomal protein L7a OS=Homo sapiens OX=9606	3	12	12	12	40.2	40.2	40.2	29.995	266	0	87.146	74261000	15
O61599	H4-16	Histone H4 OS=Homo sapiens OX=9606	1	12	12	12	61.2	61.2	61.2	11.367	103	0	98.171	251710000	22
O61600	RAN	GTP-binding nuclear protein Ran OS=Homo sapiens OX=9606	6	12	12	12	51.9	51.9	51.9	24.423	216	0	88.946	115200000	14
O61601	SLC25A24	Calcium-binding mitochondrial carrier protein SCaMC-1 OS=Homo sapiens OX=9606	3	12	12	12	27.3	27.3	27.3	53.354	477	0	83.309	27993000	15
O61602	VAT1	Synaptic vesicle membrane protein VAT-1 homolog OS=Homo sapiens OX=9606	8	12	12	12	40.5	40.5	40.5	41.92	393	0	91.146	101870000	17
O61603	NLN	Neurolysin, mitochondrial OS=Homo sapiens OX=9606	4	12	12	12	21.9	21.9	21.9	80.651	704	0	79.514	15045000	13
O61604	POFUT1	GDP-fucose protein O-fucosyltransferase 1 OS=Homo sapiens OX=9606	1	12	12	12	41.2	41.2	41.2	43.955	388	0	90.229	36543000	17
O61605	PABPC1	Polyadenylate-binding protein OS=Homo sapiens OX=9606	21	18	18	12	37.5	37.5	24.7	58.535	522	0	117.74	70965000	18
O61606	CCT3	T-complex protein 1 subunit gamma OS=Homo sapiens OX=9606	6	12	12	12	32	32	32	55.674	500	0	93.04	27628000	14
O61607	CALU	Calumenin OS=Homo sapiens OX=9606	2	13	13	13	43.5	43.5	43.5	37.106	315	0	129.79	87861000	15
O61608	IPO7	Importin-7 OS=Homo sapiens OX=9606	2	13	13	13	14.2	14.2	14.2	119.52	1038	0	97.861	17334000	12
O61609	LTA4H	Leukotriene A-4 hydrolase OS=Homo sapiens OX=9606	2	13	13	13	27.7	27.7	27.7	69.284	611	0	86.656	26291000	14
O61610	YWHAB	14-3-3 protein beta/alpha OS=Homo sapiens OX=9606	5	20	15	13	69.1	62.6	62.6	28.082	246	0	149.96	78945000	18
O61611	MDH1	Malate dehydrogenase, cytoplasmic OS=Homo sapiens OX=9606	6	13	13	13	42.2	42.2	42.2	36.426	334	0	101.22	85028000	16
O61612	NASP	Nuclear autoantigenic sperm protein OS=Homo sapiens OX=9606	8	13	13	13	22.8	22.8	22.8	85.237	788	0	108.44	70199000	17
O61613	CSE1L	Exportin-2 OS=Homo sapiens OX=9606	1	13	13	13	17.9	17.9	17.9	110.42	971	0	105.6	103270000	13
O61614	RPS4X	40S ribosomal protein S4, X isoform OS=Homo sapiens OX=9606	4	13	13	13	44.5	44.5	44.5	29.597	263	0	83.248	49430000	18
O61615	PPIA	Peptidyl-prolyl cis-trans isomerase A OS=Homo sapiens OX=9606	12	13	13	13	82.4	82.4	82.4	18.012	165	0	106.77	282810000	27
O61616	ACTG1	Actin, cytoplasmic 2 OS=Homo sapiens OX=9606	21	41	41	13	80.5	80.5	39.5	41.792	375	0	323.31	3875800000	136
O61617	CCT2	T-complex protein 1 subunit beta OS=Homo sapiens OX=9606	3	13	13	13	36.1	36.1	36.1	57.488	535	0	93.708	46805000	12
O61618	PSMD2	26S proteasome non-ATPase regulatory subunit 2 OS=Homo sapiens OX=9606	4	13	13	13	18.7	18.7	18.7	100.2	908	0	95.602	30452000	19
O61619	TXNDC5	Thioredoxin domain-containing protein 5 OS=Homo sapiens OX=9606	1	13	13	13	36.6	36.6	36.6	47.628	432	0	92.069	99049000	17
O61620	APMAP	Adipocyte plasma membrane-associated protein OS=Homo sapiens OX=9606	2	13	13	13	41.1	41.1	41.1	46.48	416	0	95.37	58247000	12
O61621	DPP3	Dipeptidyl peptidase 3 OS=Homo sapiens OX=9606	8	13	13	13	27.1	27.1	27.1	82.588	737	0	104.62	37093000	19
O61622	UBA2	SUMO-activating enzyme subunit 2 OS=Homo sapiens OX=9606	6	13	13	13	26.6	26.6	26.6	71.223	640	0	89.073	44591000	16
O61623	IMPDH2	Inosine-5'-monophosphate dehydrogenase 2 (Fragment) OS=Homo sapiens OX=9606	4	14	14	13	38.3	38.3	36.6	50.957	470	0	109.52	39223000	18
O61624	CAPNS1	Calpain small subunit 1 OS=Homo sapiens OX=9606	12	14	14	14	54.5	54.5	54.5	28.315	268	0	117.89	72296000	23
O61625	SLC25A5	ADP/ATP translocase 2 OS=Homo sapiens OX=9606	3	24	24	14	48.3	48.3	27.5	32.852	298	0	221.78	273830000	32
O61626	ALPP	Alkaline phosphatase, placental type OS=Homo sapiens OX=9606	2	18	18	14	43	43	36.4	57.953	535	0	140.21	128850000	17
O61627	PFN1	Profilin-1 OS=Homo sapiens OX=9606	4	14	14	14	75.7	75.7	75.7	15.054	140	0	111.62	227270000	24
O61628	HMGB1	High mobility group protein B1 OS=Homo sapiens OX=9606	5	14	14	14	47	47	47	24.893	215	0	94.329	91399000	18
O61629	NCL	Nucleolin OS=Homo sapiens OX=9606	2	14	14	14	20.7	20.7	20.7	76.613	710	0	144.46	35065000	15
O61630	PAK2	Serine/threonine-protein kinase PAK 2 OS=Homo sapiens OX=9606	9	14	14	14	41	41	41	58.042	524	0	99.993	24589000	15
O61631	NIBAN2	Protein Niban 2 OS=Homo sapiens OX=9606	1	14	14	14	22.7	22.7	22.7	84.137	746	0	109.59	41093000	18
O61632	ANXA6	Annexin A6 OS=Homo sapiens OX=9606	10	15	15	15	27.2	27.2	27.2	75.872	673	0	123.31	36946000	21
O61633	ANXA3	Annexin A3 OS=Homo sapiens OX=9606	6	15	15	15	41.2	41.2	41.2	36.375	323	0	117.04	60062000	22
O61634	PRKCSH	Glucosidase 2 subunit beta OS=Homo sapiens OX=9606	6	15	15	15	24.1	24.1	24.1	59.425	528	0	102.52	145240000	20
O61635	CCT8	T-complex protein 1 subunit theta OS=Homo sapiens OX=9606	3	15	15	15	30.1	30.1	30.1	59.62	548	0	103.65	62177000	20
O61636	EIF4A1	Eukaryotic initiation factor 4A-I OS=Homo sapiens OX=9606	23	15	15	15	37.9	37.9	37.9	46.153	406	0	112.14	68452000	14
O61637	SSB	Lupus La protein OS=Homo sapiens OX=9606	4	16	16	16	44.6	44.6	44.6	46.836	408	0	114.25	82350000	17
O61638	PGAM1	Phosphoglycerate mutase 1 OS=Homo sapiens OX=9606	3	16	16	16	60.6	60.6	60.6	28.804	254	0	177.52	321230000	28
O61639	MSN	Moesin OS=Homo sapiens OX=9606	5	26	26	16	37.4	37.4	24.8	67.819	577	0	213.18	108930000	34
O61640	PGM1	Phosphoglucomutase-1 OS=Homo sapiens OX=9606	2	16	16	16	34.9	34.9	34.9	61.448	562	0	113.56	40965000	14
O61641	HSPH1	Heat shock protein 105 kDa OS=Homo sapiens OX=9606	4	20	17	16	22.8	19.9	19.9	96.864	858	0	119.25	63290000	21
O61642	SFXN1	Sideroflexin-1 OS=Homo sapiens OX=9606	6	16	16	16	51.2	51.2	51.2	35.619	322	0	130.08	110500000	27
O61643	IPO5	Importin-5 OS=Homo sapiens OX=9606	18	17	17	17	21.6	21.6	21.6	123.63	1097	0	113.51	36508000	19
O61644	ANXA1	Annexin A1 OS=Homo sapiens OX=9606	3	17	17	17	56.4	56.4	56.4	38.714	346	0	148.7	149230000	27
O61645	ATP1A1	Sodium/potassium-transporting ATPase subunit alpha-1 OS=Homo sapiens OX=9606	14	17	17	17	19.6	19.6	19.6	112.89	1023	0	120.95	40785000	19
O61646	HSPD1	60 kDa heat shock protein, mitochondrial OS=Homo sapiens OX=9606	7	17	17	17	38.4	38.4	38.4	61.054	573	0	130.97	45344000	19
O61647	HSPA8	Heat shock cognate 71 kDa protein OS=Homo sapiens OX=9606	14	38	37	17	52	52	26	70.897	646	0	323.31	603380000	60
O61648	GOT1	Aspartate aminotransferase, cytoplasmic OS=Homo sapiens OX=9606	1	17	17	17	53.3	53.3	53.3	46.247	413	0	148.02	125420000	24
O61649	WARS1	Tryptophan--tRNA ligase, cytoplasmic OS=Homo sapiens OX=9606	27	17	17	17	42.5	42.5	42.5	53.165	471	0	149.57	96491000	28
O61650	SFN	14-3-3 protein sigma OS=Homo sapiens OX=9606	1	19	17	17	63.3	60.1	60.1	27.774	248	0	162.81	116540000	24
O61651	YWHAZ	14-3-3 protein zeta/delta OS=Homo sapiens OX=9606	10	21	17	17	67.3	63.7	63.7	27.745	245	0	240.73	159610000	18
O61652	KPNB1	Importin subunit beta-1 OS=Homo sapiens OX=9606	5	17	17	17	22.8	22.8	22.8	97.169	876	0	133.78	94823000	22
O61653	UGDH	UDP-glucose 6-dehydrogenase OS=Homo sapiens OX=9606	7	18	18	18	44.5	44.5	44.5	55.023	494	0	159.86	66551000	17
O61654	KRT1	Keratin, type II cytoskeletal 1 OS=Homo sapiens OX=9606	2	27	27	18	42.2	42.2	31.8	66.038	644	0	234.36	176030000	36
O61655	KRT10	Keratin, type I cytoskeletal 10 OS=Homo sapiens OX=9606	41	23	23	18	43.3	43.3	37	58.826	584	0	181.77	128960000	26
O61656	PLS3	Plastin-3 OS=Homo sapiens OX=9606	9	18	18	18	34.9	34.9	34.9	70.81	630	0	140.08	93683000	21
O61657	YWHAQ	14-3-3 protein theta OS=Homo sapiens OX=9606	2	23	21	18	70.2	70.2	63.7	27.764	245	0	180.8	120660000	23
O61658	SERPINB6	Serpin B6 OS=Homo sapiens OX=9606	14	18	18	18	61.4	61.4	61.4	42.621	376	0	137.82	87281000	23
O61659	SERPINH1	Serpin H1 OS=Homo sapiens OX=9606	13	18	18	18	54.3	54.3	54.3	46.44	418	0	209.07	188280000	29
O61660	PSAT1	Phosphoserine aminotransferase OS=Homo sapiens OX=9606	1	18	18	18	49.2	49.2	49.2	40.422	370	0	128.44	117470000	27
O61661	FLNA	Filamin-A OS=Homo sapiens OX=9606	4	18	18	18	11.4	11.4	11.4	245.85	2315	0	126.87	32131000	18
O61662	NPEPPS	Aminopeptidase OS=Homo sapiens OX=9606	10	18	18	18	22.7	22.7	22.7	102.99	915	0	126.4	79542000	22
O61663	ANXA5	Annexin A5 OS=Homo sapiens OX=9606	5	19	19	19	55.9	55.9	55.9	35.936	320	0	185.15	531910000	36
O61664	PKM	Pyruvate kinase PKM OS=Homo sapiens OX=9606	12	19	19	19	57.3	57.3	57.3	57.936	531	0	149.55	121710000	26
O61665	PRDX6	Peroxiredoxin-6 OS=Homo sapiens OX=9606	1	19	19	19	78.1	78.1	78.1	25.035	224	0	160.02	376540000	40
O61666	FKBP4	Peptidyl-prolyl cis-trans isomerase FKBP4 OS=Homo sapiens OX=9606	4	19	19	19	52.7	52.7	52.7	51.804	459	0	136.9	76409000	27
O61667	PRDX1	Peroxiredoxin-1 OS=Homo sapiens OX=9606	3	22	22	19	73.4	73.4	61.8	22.11	199	0	179.61	240050000	43
O61668	PPIB	Peptidyl-prolyl cis-trans isomerase B OS=Homo sapiens OX=9606	1	20	20	20	67.6	67.6	67.6	23.742	216	0	180.77	395170000	49
O61669	PPA1	Inorganic pyrophosphatase OS=Homo sapiens OX=9606	2	20	20	20	71.6	71.6	71.6	32.66	289	0	173.81	185130000	29
O61670	SLC3A2	4F2 cell-surface antigen heavy chain OS=Homo sapiens OX=9606	9	20	20	20	33.6	33.6	33.6	64.872	599	0	143.71	230890000	28
O61671	TFRC	Transferrin receptor protein 1 OS=Homo sapiens OX=9606	4	21	21	21	31.1	31.1	31.1	84.87	760	0	157.79	67948000	22
O61672	HSPA1B	Heat shock 70 kDa protein 1B OS=Homo sapiens OX=9606	4	32	30	21	46.2	42.7	29	70.051	641	0	268.64	246510000	42
O61673	RPL4	60S ribosomal protein L4 OS=Homo sapiens OX=9606	4	21	21	21	42.9	42.9	42.9	47.697	427	0	162.46	103500000	29
O61674	YWHAE	14-3-3 protein epsilon OS=Homo sapiens OX=9606	6	23	23	21	68.2	68.2	68.2	29.174	255	0	203.3	225360000	35
O61675	PDIA6	Protein disulfide-isomerase A6 OS=Homo sapiens OX=9606	1	21	21	21	49.8	49.8	49.8	48.121	440	0	183.48	300790000	25
O61676	GPI	Glucose-6-phosphate isomerase OS=Homo sapiens OX=9606	21	22	22	22	54.7	54.7	54.7	63.146	558	0	184.74	104120000	23
O61677	CALR	Calreticulin OS=Homo sapiens OX=9606	3	22	22	22	56.1	56.1	56.1	48.141	417	0	253.41	609660000	55
O61678	CANX	Calnexin OS=Homo sapiens OX=9606	12	22	22	22	36.8	36.8	36.8	67.567	592	0	174.14	206670000	44
O61679	ALDOA	Fructose-bisphosphate aldolase A OS=Homo sapiens OX=9606	12	25	25	23	70.3	70.3	60.7	39.42	364	0	211.86	234750000	31
O61680	TKT	Transketolase OS=Homo sapiens OX=9606	5	23	23	23	41.9	41.9	41.9	67.877	623	0	178.63	143350000	38
O61681	IQGAP1	Ras GTPase-activating-like protein IQGAP1 OS=Homo sapiens OX=9606	9	23	23	23	16.7	16.7	16.7	189.25	1657	0	168.32	42824000	28
O61682	AARS1	Alanine--tRNA ligase, cytoplasmic OS=Homo sapiens OX=9606	2	25	25	25	29.2	29.2	29.2	106.81	968	0	202.82	53978000	32
O61683	PFAS	Phosphoribosylformylglycinamidine synthase OS=Homo sapiens OX=9606	8	26	26	26	28.6	28.6	28.6	144.73	1338	0	217.21	110750000	34
O61684	GARS1	Glycine--tRNA ligase OS=Homo sapiens OX=9606	2	26	26	26	40.1	40.1	40.1	83.165	739	0	245.58	201280000	44
O61685	LDHB	L-lactate dehydrogenase B chain OS=Homo sapiens OX=9606	5	30	27	27	70.4	66.5	66.5	36.638	334	0	313.4	587190000	52
O61686	ANXA2	Annexin A2 OS=Homo sapiens OX=9606	24	27	27	27	77.3	77.3	77.3	38.604	339	0	249.21	375360000	46
O61687	STIP1	Stress-induced-phosphoprotein 1 OS=Homo sapiens OX=9606	4	27	27	27	53.6	53.6	53.6	62.639	543	0	223.87	116380000	41
O61688	TPI1	Triosephosphate isomerase OS=Homo sapiens OX=9606	4	27	27	27	81.8	81.8	81.8	30.791	286	0	261.98	758720000	44
O61689	G6PD	Glucose-6-phosphate 1-dehydrogenase OS=Homo sapiens OX=9606	4	28	28	28	53.6	53.6	53.6	59.256	515	0	215.26	116230000	35
O61690	VCL	Vinculin OS=Homo sapiens OX=9606	2	28	28	28	36.4	36.4	36.4	123.8	1134	0	208.44	75352000	36
O61691	UGGT1	UDP-glucose:glycoprotein glucosyltransferase 1 OS=Homo sapiens OX=9606	5	28	28	28	22.5	22.5	22.5	177.19	1555	0	204.67	73240000	33
O61692	PDIA3	Protein disulfide-isomerase A3 OS=Homo sapiens OX=9606	1	35	35	29	63.8	63.8	54.7	56.782	505	0	323.31	857290000	59
O61693	ACTN4	Alpha-actinin-4 OS=Homo sapiens OX=9606	17	47	47	30	59.7	59.7	41.5	104.85	911	0	323.31	298560000	79
O61694	LDHA	L-lactate dehydrogenase A chain OS=Homo sapiens OX=9606	16	34	34	30	86.4	86.4	78.3	36.688	332	0	323.31	865730000	38
O61695	PGK1	Phosphoglycerate kinase 1 OS=Homo sapiens OX=9606	2	32	32	32	81.5	81.5	81.5	44.614	417	0	297.14	287370000	54
O61696	HSPA4	Heat shock 70 kDa protein 4 OS=Homo sapiens OX=9606	3	37	37	34	47.9	47.9	44.9	94.33	840	0	292.54	248470000	58
O61697	UBA1	Ubiquitin-like modifier-activating enzyme 1 OS=Homo sapiens OX=9606	7	35	35	35	44.1	44.1	44.1	117.85	1058	0	323.31	262210000	50
O61698	HYOU1	Hypoxia up-regulated protein 1 OS=Homo sapiens OX=9606	13	35	35	35	39.8	39.8	39.8	104.78	937	0	268.57	174690000	38
O61699	GAPDH	Glyceraldehyde-3-phosphate dehydrogenase OS=Homo sapiens OX=9606	2	37	37	36	90.1	90.1	90.1	36.053	335	0	323.31	683900000	100
O61700	HSP90AB1	Heat shock protein HSP 90-beta OS=Homo sapiens OX=9606	3	63	63	36	56.5	56.5	44.6	83.263	724	0	323.31	1335200000	151
O61701	EEF2	Elongation factor 2 OS=Homo sapiens OX=9606	1	37	37	37	46.3	46.3	46.3	95.337	858	0	286.09	218480000	51
O61702	TARS1	Threonine--tRNA ligase 1, cytoplasmic OS=Homo sapiens OX=9606	13	38	38	38	50.5	50.5	50.5	83.434	723	0	277.1	146270000	45
O61703	GANAB	Neutral alpha-glucosidase AB OS=Homo sapiens OX=9606	4	38	38	38	48.8	48.8	48.8	106.87	944	0	323.31	403530000	60
O61704	PDIA4	Protein disulfide-isomerase A4 OS=Homo sapiens OX=9606	2	39	39	39	51.6	51.6	51.6	72.932	645	0	301.18	297050000	63
O61705	HSP90AA1	Heat shock protein HSP 90-alpha OS=Homo sapiens OX=9606	6	61	40	40	57.4	42.1	42.1	84.659	732	0	323.31	532410000	59
O61706	P4HB	Protein disulfide-isomerase OS=Homo sapiens OX=9606	12	41	41	41	68.3	68.3	68.3	57.116	508	0	323.31	542020000	53
O61707	ENO1	Alpha-enolase OS=Homo sapiens OX=9606	9	45	45	42	85.3	85.3	80.2	47.168	434	0	323.31	1169900000	137
O61708	VCP	Transitional endoplasmic reticulum ATPase OS=Homo sapiens OX=9606	3	42	42	42	60.2	60.2	60.2	89.321	806	0	323.31	204050000	47
O61709	HSP90B1	Endoplasmin OS=Homo sapiens OX=9606	6	51	49	49	62.1	60.4	60.4	92.468	803	0	323.31	774260000	93
O61710	HSPA5	Endoplasmic reticulum chaperone BiP OS=Homo sapiens OX=9606	3	52	52	51	62.4	62.4	62.4	72.332	654	0	323.31	867660000	91

## Sheet: HOTAIR-3
Majority protein IDs	Protein Name	Description	Number of proteins	Peptides	Razor + unique peptides	Unique peptides	Sequence coverage [%]	Unique + razor sequence coverage [%]	Unique sequence coverage [%]	Mol. weight [kDa]	Sequence length	Sequence lengths	Q-value	Score	Intensity	MS/MS count	Only identified by site	Reverse	Potential contaminant
P49588	AARS1	Alanine--tRNA ligase, cytoplasmic OS=Homo sapiens OX=9606	2	27	27	27	32.5	32.5	32.5	106.81	968	968;280	0	239.41	56529000	37
D6R9I9	ABCE1	ATP-binding cassette sub-family E member 1 OS=Homo sapiens OX=9606	4	2	2	2	6.2	6.2	6.2	47.037	421	421;599;147;210	0	14.016	1730100	2
H0YGW7	ABCF1	ATP-binding cassette sub-family F member 1 (Fragment) OS=Homo sapiens OX=9606	2	2	2	2	5.2	5.2	5.2	67.55	596	596;845	0	12.153	1477400	2
P49748	ACADVL	Very long-chain specific acyl-CoA dehydrogenase, mitochondrial OS=Homo sapiens OX=9606	3	3	3	3	6.7	6.7	6.7	70.389	655	655;282;204	0	18.581	1313700	1
P53396	ACLY	ATP-citrate synthase OS=Homo sapiens OX=9606	2	3	3	3	3.6	3.6	3.6	120.84	1101	1101;109	0	23.025	4799200	3
P21399	ACO1	Cytoplasmic aconitate hydratase OS=Homo sapiens OX=9606	1	11	11	11	16	16	16	98.398	889	889	0	73.712	15934000	12
O00154	ACOT7	Cytosolic acyl coenzyme A thioester hydrolase OS=Homo sapiens OX=9606	2	3	3	3	9.2	9.2	9.2	41.796	380	380;279	0	19.321	1653700	3
O95573	ACSL3	Long-chain-fatty-acid--CoA ligase 3 OS=Homo sapiens OX=9606	2	5	5	4	9.9	9.9	7.4	80.419	720	720;141	0	29.262	5679400	5
P68133	ACTA1	Actin, alpha skeletal muscle OS=Homo sapiens OX=9606	8	27	4	4	37.1	9	9	42.051	377	377;377;376;377;254;144;151;151	0	57.126	301590000	15
O96019	ACTL6A	Actin-like protein 6A OS=Homo sapiens OX=9606	3	5	5	5	19.1	19.1	19.1	47.46	429	429;161;426	0	46.01	8893400	8
P12814	ACTN1	Alpha-actinin-1 OS=Homo sapiens OX=9606	8	27	11	11	33.7	16.4	16.4	103.06	892	892;822;238;260;251;144;297;207	0	84.863	17318000	13
O43707	ACTN4	Alpha-actinin-4 OS=Homo sapiens OX=9606	19	47	47	31	61.8	61.8	45.3	104.85	911	911;521;342;182;901;858;894;944;105;182;263;686;85;126;131;588;2002;2564;2564	0	323.31	308160000	84
A0A1B0GU86	ACY1	N-acyl-L-amino-acid amidohydrolase OS=Homo sapiens OX=9606	13	7	7	7	20.4	20.4	20.4	42.179	373	373;408;586;275;509;228;264;201;39;66;74;113;103	0	54.88	27787000	11
P11766	ADH5	Alcohol dehydrogenase class-3 OS=Homo sapiens OX=9606	5	4	4	4	12	12	12	39.724	374	374;262;56;95;115	0	23.283	4800400	4
Q9BV57	ADI1	1,2-dihydroxy-3-keto-5-methylthiopentene dioxygenase OS=Homo sapiens OX=9606	3	2	2	2	19.6	19.6	19.6	21.498	179	179;99;117	0	18.856	7307900	5
P55263	ADK	Adenosine kinase OS=Homo sapiens OX=9606	1	5	5	5	18.8	18.8	18.8	40.545	362	362	0	34.398	13987000	7
Q96SZ5	ADO	2-aminoethanethiol dioxygenase OS=Homo sapiens OX=9606	1	2	2	2	5.9	5.9	5.9	29.751	270	270	0.0011429	10.782	341400	1
Q9BRR6	ADPGK	ADP-dependent glucokinase OS=Homo sapiens OX=9606	4	5	5	5	14.1	14.1	14.1	54.088	497	497;57;113;204	0	34.423	9999900	7
Q9NX46	ADPRS	ADP-ribose glycohydrolase ARH3 OS=Homo sapiens OX=9606	1	2	2	2	7.4	7.4	7.4	38.946	363	363	0	15.127	1480500	1
P30520	ADSS2	Adenylosuccinate synthetase isozyme 2 OS=Homo sapiens OX=9606	1	6	6	6	19.1	19.1	19.1	50.097	456	456	0	36.815	4238300	7
E9PG39	AGK	Acylglycerol kinase, mitochondrial OS=Homo sapiens OX=9606	10	2	2	2	10.2	10.2	10.2	26.925	244	244;350;394;418;422;51;146;214;226;330	0	11.33	1069700	2
Q6RW13	AGTRAP	Type-1 angiotensin II receptor-associated protein OS=Homo sapiens OX=9606	1	2	2	2	24.5	24.5	24.5	17.419	159	159	0	19.728	1754600	2
P23526	AHCY	Adenosylhomocysteinase OS=Homo sapiens OX=9606	1	9	9	9	22.5	22.5	22.5	47.716	432	432	0	65.003	12392000	7
Q09666	AHNAK	Neuroblast differentiation-associated protein AHNAK OS=Homo sapiens OX=9606	1	7	7	7	7.8	7.8	7.8	629.09	5890	5890	0	40.989	3259800	6
O95433	AHSA1	Activator of 90 kDa heat shock protein ATPase homolog 1 OS=Homo sapiens OX=9606	6	7	7	7	24	24	24	38.274	338	338;203;216;90;133;100	0	50.86	15469000	8
P00568	AK1	Adenylate kinase isoenzyme 1 OS=Homo sapiens OX=9606	2	2	2	2	12.9	12.9	12.9	21.635	194	194;210	0	13.562	2567700	3
F8W1A4	AK2	Adenylate kinase 2, mitochondrial OS=Homo sapiens OX=9606	6	6	6	6	39.7	39.7	39.7	25.63	232	232;239;190;133;162;42	0	46.145	10898000	9
P14550	AKR1A1	Aldo-keto reductase family 1 member A1 OS=Homo sapiens OX=9606	4	5	5	5	22.8	22.8	22.8	36.573	325	325;119;140;147	0	32.963	3780800	5
P15121	AKR1B1	Aldo-keto reductase family 1 member B1 OS=Homo sapiens OX=9606	3	4	4	4	21.5	21.5	21.5	35.853	316	316;263;316	0	24.39	7831200	5
A0A1B0GUY0	ALDH7A1	Alpha-aminoadipic semialdehyde dehydrogenase (Fragment) OS=Homo sapiens OX=9606	13	3	3	3	11.5	11.5	11.5	37.713	348	348;472;499;521;536;539;545;554;294;479;164;193;239	0	22.368	4742400	3
P49189	ALDH9A1	4-trimethylaminobutyraldehyde dehydrogenase OS=Homo sapiens OX=9606	1	7	7	7	18.6	18.6	18.6	53.801	494	494	0	48.979	21113000	9
P04075	ALDOA	Fructose-bisphosphate aldolase A OS=Homo sapiens OX=9606	12	24	24	22	70.3	70.3	60.7	39.42	364	364;368;361;278;155;162;140;204;130;316;342;364	0	219.01	207370000	32
P09972	ALDOC	Fructose-bisphosphate aldolase C OS=Homo sapiens OX=9606	7	8	6	6	35.4	25.8	25.8	39.455	364	364;336;149;175;180;122;135	0	45.992	13872000	5
P09923	ALPI	Intestinal-type alkaline phosphatase OS=Homo sapiens OX=9606	1	8	3	3	17.6	8.5	8.5	56.811	528	528	0	22.575	11343000	4
P05186	ALPL	Alkaline phosphatase, tissue-nonspecific isozyme OS=Homo sapiens OX=9606	3	12	12	12	27.3	27.3	27.3	57.304	524	524;216;1866	0	92.435	35275000	18
P05187	ALPP	Alkaline phosphatase, placental type OS=Homo sapiens OX=9606	2	18	18	13	45.2	45.2	37.9	57.953	535	535;532	0	146.37	90315000	18
H0YN26	ANP32A	Acidic leucine-rich nuclear phosphoprotein 32 family member A OS=Homo sapiens OX=9606	5	9	9	8	39.5	39.5	35.6	19.997	177	177;249;79;131;234	0	79.075	35806000	12
Q92688	ANP32B	Acidic leucine-rich nuclear phosphoprotein 32 family member B OS=Homo sapiens OX=9606	1	6	5	5	25.5	22.7	22.7	28.787	251	251	0	40.531	18255000	10
E9PPH5	ANP32E	Acidic leucine-rich nuclear phosphoprotein 32 family member E (Fragment) OS=Homo sapiens OX=9606	4	2	2	2	23.7	23.7	23.7	13.128	114	114;268;149;165	0	13.245	2404700	2
P04083	ANXA1	Annexin A1 OS=Homo sapiens OX=9606	3	15	15	15	54	54	54	38.714	346	346;204;115	0	157.28	121740000	28
P50995	ANXA11	Annexin A11 OS=Homo sapiens OX=9606	2	3	3	3	10.1	10.1	10.1	54.389	505	505;148	0	19.764	2947200	4
P07355	ANXA2	Annexin A2 OS=Homo sapiens OX=9606	24	27	27	27	73.7	73.7	73.7	38.604	339	339;256;227;230;248;339;176;175;139;142;149;119;132;133;134;79;110;146;81;59;65;47;69;45	0	292.72	343010000	52
P12429	ANXA3	Annexin A3 OS=Homo sapiens OX=9606	6	14	14	14	47.7	47.7	47.7	36.375	323	323;284;154;104;134;55	0	101.69	53140000	19
Q6P452	ANXA4	Annexin OS=Homo sapiens OX=9606	3	4	4	4	15.7	15.7	15.7	33.552	299	299;319;142	0	24.157	3526200	4
P08758	ANXA5	Annexin A5 OS=Homo sapiens OX=9606	5	20	20	20	64.7	64.7	64.7	35.936	320	320;260;220;163;35	0	233.58	358690000	34
P08133	ANXA6	Annexin A6 OS=Homo sapiens OX=9606	9	14	14	4	25.1	25.1	7.6	75.872	673	673;330;129;150;129;156;91;110;95	0	130.36	26694000	18
P20073	ANXA7	Annexin A7 OS=Homo sapiens OX=9606	1	4	4	4	9	9	9	52.739	488	488	0	26.671	9764300	5
P13798	APEH	Acylamino-acid-releasing enzyme OS=Homo sapiens OX=9606	5	6	6	6	9	9	9	81.224	732	732;737;308;232;284	0	48.869	13867000	10
G3V3C7	APEX1	DNA-(apurinic or apyrimidinic site) endonuclease (Fragment) OS=Homo sapiens OX=9606	9	3	3	3	24.7	24.7	24.7	19.056	174	174;263;318;107;146;162;172;242;150	0	18.047	3224700	3
Q9HDC9	APMAP	Adipocyte plasma membrane-associated protein OS=Homo sapiens OX=9606	2	14	14	14	48.1	48.1	48.1	46.48	416	416;409	0	113.92	58587000	15
P07741	APRT	Adenine phosphoribosyltransferase OS=Homo sapiens OX=9606	5	9	9	9	61.7	61.7	61.7	19.608	180	180;148;162;153;63	0	98.979	83456000	14
P84077	ARF1	ADP-ribosylation factor 1 OS=Homo sapiens OX=9606	10	8	8	6	52.5	52.5	35.4	20.697	181	181;181;210;62;102;150;180;40;50;59	0	63.065	60492000	9
P18085	ARF4	ADP-ribosylation factor 4 OS=Homo sapiens OX=9606	4	4	2	2	26.7	9.4	9.4	20.511	180	180;127;153;71	0	13.47	4886300	2
J3KTF8	ARHGDIA	Rho GDP-dissociation inhibitor 1 (Fragment) OS=Homo sapiens OX=9606	6	10	10	10	55.4	55.4	55.4	21.517	193	193;204;235;249;129;92	0	116.85	39049000	12
P40616	ARL1	ADP-ribosylation factor-like protein 1 OS=Homo sapiens OX=9606	6	3	3	3	22.7	22.7	22.7	20.417	181	181;135;194;17;52;64	0	20.632	5312800	3
P36405	ARL3	ADP-ribosylation factor-like protein 3 OS=Homo sapiens OX=9606	1	3	3	3	10.4	10.4	10.4	20.455	182	182	0	18.156	2473900	2
P00966	ASS1	Argininosuccinate synthase OS=Homo sapiens OX=9606	3	15	15	15	26.9	26.9	26.9	46.53	412	412;198;179	0	112.96	75047000	19
P31939	ATIC	Bifunctional purine biosynthesis protein ATIC OS=Homo sapiens OX=9606	4	13	13	13	27.9	27.9	27.9	64.615	592	592;231;170;84	0	92.091	26565000	16
Q6DD88	ATL3	Atlastin-3 OS=Homo sapiens OX=9606	3	3	3	3	8.7	8.7	8.7	60.541	541	541;523;169	0	17.851	3906900	3
P05023	ATP1A1	Sodium/potassium-transporting ATPase subunit alpha-1 OS=Homo sapiens OX=9606	13	18	18	18	22.9	22.9	22.9	112.89	1023	1023;983;1010;1013;1226;714;1009;1020;1029;1039;106;144;1035	0	137.18	62350000	26
P05026	ATP1B1	Sodium/potassium-transporting ATPase subunit beta-1 OS=Homo sapiens OX=9606	2	3	3	3	13.9	13.9	13.9	35.061	303	303;130	0	18.8	6992700	3
P54709	ATP1B3	Sodium/potassium-transporting ATPase subunit beta-3 OS=Homo sapiens OX=9606	6	3	3	3	14.3	14.3	14.3	31.512	279	279;133;27;43;44;119	0	22.722	18161000	6
H7C5W9	ATP2A2	Endoplasmic reticulum class 1/2 Ca(2+) ATPase (Fragment) OS=Homo sapiens OX=9606	3	2	2	2	3.2	3.2	3.2	102.48	933	933;1042;1043	0	12.679	2952800	2
E7ERY9	ATP2B1	Calcium-transporting ATPase OS=Homo sapiens OX=9606	11	4	4	4	4.8	4.8	4.8	106.86	963	963;1220;996;1099;1243;1160;1188;1220;1241;162;300	0	25.188	2068600	5
P25705	ATP5F1A	ATP synthase subunit alpha, mitochondrial OS=Homo sapiens OX=9606	24	9	9	9	20.8	20.8	20.8	59.75	553	553;205;207;144;199;77;111;58;65;69;97;112;149;154;162;184;243;254;267;615;625;639;708;736	0	81.563	15134000	10
P06576	ATP5F1B	ATP synthase subunit beta, mitochondrial OS=Homo sapiens OX=9606	5	11	11	11	31.4	31.4	31.4	56.559	529	529;362;284;270;133	0	89.55	37599000	14
Q15904	ATP6AP1	V-type proton ATPase subunit S1 OS=Homo sapiens OX=9606	4	2	2	2	4.3	4.3	4.3	52.025	470	470;230;273;281	0	11.606	1792100	1
B7Z641	ATP6V0A1	V-type proton ATPase subunit a OS=Homo sapiens OX=9606	8	2	2	2	2.7	2.7	2.7	90.499	788	788;794;837;68;93;130;195;198	0	11.183	1251400	1
P38606	ATP6V1A	V-type proton ATPase catalytic subunit A OS=Homo sapiens OX=9606	3	7	7	7	13.8	13.8	13.8	68.303	617	617;184;221	0	49.979	12118000	10
P80723	BASP1	Brain acid soluble protein 1 OS=Homo sapiens OX=9606	1	5	5	5	57.3	57.3	57.3	22.693	227	227	0	39.191	19668000	6
P51572	BCAP31	B-cell receptor-associated protein 31 OS=Homo sapiens OX=9606	5	4	4	4	18.7	18.7	18.7	27.991	246	246;182;187;188;211	0	31.309	6913500	4
E9PDD6	BCL2L13	Bcl-2-like protein 13 OS=Homo sapiens OX=9606	8	2	2	2	23.4	23.4	23.4	19.019	171	171;485;78;80;92;128;461;509	0	14.099	1846300	2
K7ES02	BLMH	Bleomycin hydrolase (Fragment) OS=Homo sapiens OX=9606	6	11	11	11	47.5	47.5	47.5	37.198	318	318;455;262;231;71;93	0	87.874	42497000	13
P30043	BLVRB	Flavin reductase (NADPH) OS=Homo sapiens OX=9606	5	4	4	4	27.7	27.7	27.7	22.119	206	206;163;245;121;154	0	29.153	15396000	6
P35613	BSG	Basigin OS=Homo sapiens OX=9606	7	8	8	8	23.9	23.9	23.9	42.2	385	385;189;221;160;84;52;132	0	63.45	20792000	9
P20290	BTF3	Transcription factor BTF3 OS=Homo sapiens OX=9606	1	3	3	3	7.3	7.3	7.3	22.168	206	206	0	18.15	2905300	2
J3QT28	BUB3	Mitotic checkpoint protein BUB3 (Fragment) OS=Homo sapiens OX=9606	2	2	2	2	7.6	7.6	7.6	31.703	278	278;328	0	11.54	318820	2
Q7L1Q6	BZW1	Basic leucine zipper and W2 domain-containing protein 1 OS=Homo sapiens OX=9606	3	3	3	2	6.9	6.9	5.3	48.043	419	419;135;294	0	16.076	1016200	1
Q5T6V5	C9orf64	Queuosine salvage protein OS=Homo sapiens OX=9606	3	6	6	6	14.7	14.7	14.7	39.028	341	341;200;60	0	40.702	12576000	6
Q9HB71	CACYBP	Calcyclin-binding protein OS=Homo sapiens OX=9606	2	8	8	8	42.5	42.5	42.5	26.21	228	228;50	0	78.031	35017000	12
C9J813	CALD1	Caldesmon (Fragment) OS=Homo sapiens OX=9606	4	2	2	2	7.4	7.4	7.4	54.158	459	459;536;557;793	0	13.146	1843800	2
P27797	CALR	Calreticulin OS=Homo sapiens OX=9606	3	22	22	22	56.1	56.1	56.1	48.141	417	417;247;163	0	279.39	549300000	60
O43852	CALU	Calumenin OS=Homo sapiens OX=9606	2	11	11	11	42.9	42.9	42.9	37.106	315	315;147	0	115.98	75588000	15
Q86VP6	CAND1	Cullin-associated NEDD8-dissociated protein 1 OS=Homo sapiens OX=9606	3	7	7	7	6.7	6.7	6.7	136.37	1230	1230;770;442	0	50.864	7829700	6
P27824	CANX	Calnexin OS=Homo sapiens OX=9606	12	23	23	23	37.7	37.7	37.7	67.567	592	592;308;131;170;134;144;168;189;107;78;96;610	0	178.92	152920000	37
Q01518	CAP1	Adenylyl cyclase-associated protein 1 OS=Homo sapiens OX=9606	10	20	20	10	47.2	47.2	26.9	51.901	475	475;215;174;176;179;201;203;208;145;58	0	163.41	94970000	30
P40121	CAPG	Macrophage-capping protein OS=Homo sapiens OX=9606	4	8	8	8	29.3	29.3	29.3	38.498	348	348;253;103;218	0	63.752	20928000	9
P07384	CAPN1	Calpain-1 catalytic subunit OS=Homo sapiens OX=9606	11	12	12	12	14.7	14.7	14.7	81.889	714	714;122;135;148;152;161;163;191;191;201;63	0	75.991	16122000	11
P17655	CAPN2	Calpain-2 catalytic subunit OS=Homo sapiens OX=9606	1	13	13	13	23.1	23.1	23.1	79.994	700	700	0	100.71	30039000	16
P04632	CAPNS1	Calpain small subunit 1 OS=Homo sapiens OX=9606	12	13	13	13	56.7	56.7	56.7	28.315	268	268;322;278;196;197;238;161;163;100;94;72;248	0	102.67	40344000	19
G3V153	CAPRIN1	Caprin-1 OS=Homo sapiens OX=9606	3	4	4	4	6.7	6.7	6.7	70.353	628	628;709;186	0	25.126	5617600	3
P52907	CAPZA1	F-actin-capping protein subunit alpha-1 OS=Homo sapiens OX=9606	1	9	9	7	47.6	47.6	38.1	32.922	286	286	0	75.924	57075000	12
P47755	CAPZA2	F-actin-capping protein subunit alpha-2 OS=Homo sapiens OX=9606	4	7	5	5	36.4	26.9	26.9	32.949	286	286;174;146;174	0	46.654	7566200	5
B1AK87	CAPZB	F-actin-capping protein subunit beta OS=Homo sapiens OX=9606	4	9	9	9	48.1	48.1	48.1	29.295	260	260;301;277;260	0	80.553	32408000	10
B4DKY1	CARS1	Cysteinyl-tRNA synthetase OS=Homo sapiens OX=9606	2	2	2	2	3.5	3.5	3.5	84.277	739	739;748	0	20.319	4362900	3
E7EQ12	CAST	Calpain inhibitor OS=Homo sapiens OX=9606	14	4	4	4	16.3	16.3	16.3	46.133	423	423;430;431;436;450;465;636;642;673;693;694;708;754;203	0	21.963	3924100	4
F2Z3I9	CASTOR1	Cytosolic arginine sensor for mTORC1 subunit 1 OS=Homo sapiens OX=9606	7	2	2	2	35.7	35.7	35.7	4.97	42	42;62;74;291;329;62;329	0	10.938	892250	2
P04040	CAT	Catalase OS=Homo sapiens OX=9606	1	4	4	4	10.1	10.1	10.1	59.755	527	527	0	25.979	3584700	4
Q6NZI2	CAVIN1	Caveolae-associated protein 1 OS=Homo sapiens OX=9606	1	3	3	3	9	9	9	43.476	390	390	0	19.928	4160300	4
P16152	CBR1	Carbonyl reductase [NADPH] 1 OS=Homo sapiens OX=9606	4	11	11	11	57	57	57	30.375	277	277;178;222;277	0	73.665	23265000	12
P35520	CBS	Cystathionine beta-synthase OS=Homo sapiens OX=9606	3	2	2	2	5.8	5.8	5.8	60.586	551	551;551;224	0	15.805	1451400	2
Q13185	CBX3	Chromobox protein homolog 3 OS=Homo sapiens OX=9606	4	4	4	4	27.3	27.3	27.3	20.811	183	183;62;101;107	0	28.319	5123400	5
F5GWF6	CCT2	CCT-beta OS=Homo sapiens OX=9606	3	14	14	14	37.5	37.5	37.5	56.806	530	530;535;416	0	97.755	42079000	15
P49368	CCT3	T-complex protein 1 subunit gamma OS=Homo sapiens OX=9606	8	15	15	15	37.6	37.6	37.6	60.533	545	545;500;234;276;144;154;161;188	0	100.07	33341000	22
P50991	CCT4	T-complex protein 1 subunit delta OS=Homo sapiens OX=9606	1	12	12	12	27.1	27.1	27.1	57.924	539	539	0	75.523	30286000	11
P48643	CCT5	T-complex protein 1 subunit epsilon OS=Homo sapiens OX=9606	5	10	10	10	24	24	24	59.67	541	541;486;503;520;44	0	68.405	27788000	13
P40227	CCT6A	T-complex protein 1 subunit zeta OS=Homo sapiens OX=9606	2	10	10	10	22.2	22.2	22.2	58.024	531	531;530	0	66.389	13826000	10
Q99832	CCT7	T-complex protein 1 subunit eta OS=Homo sapiens OX=9606	2	9	9	9	23.6	23.6	23.6	59.366	543	543;98	0	63.308	29739000	9
P50990	CCT8	T-complex protein 1 subunit theta OS=Homo sapiens OX=9606	3	15	15	15	30.3	30.3	30.3	59.62	548	548;323;107	0	101.93	54160000	20
H0YD13	CD44	CD44 antigen OS=Homo sapiens OX=9606	12	4	4	4	21.4	21.4	21.4	22.683	206	206;742;240;277;287;294;78;183;229;80;82;232	0	25.197	11625000	4
P32320	CDA	Cytidine deaminase OS=Homo sapiens OX=9606	1	4	4	4	47.9	47.9	47.9	16.185	146	146	0	26.509	6295000	5
X6RKY7	CDC123	Cell division cycle protein 123 homolog (Fragment) OS=Homo sapiens OX=9606	4	2	2	2	10.8	10.8	10.8	17.777	157	157;295;336;183	0	11.085	1672800	1
Q16543	CDC37	Hsp90 co-chaperone Cdc37 OS=Homo sapiens OX=9606	5	6	6	6	26.7	26.7	26.7	44.468	378	378;230;353;104;184	0	50.138	11415000	6
P60953	CDC42	Cell division control protein 42 homolog OS=Homo sapiens OX=9606	4	5	4	4	27.2	21.5	21.5	21.258	191	191;115;136;156	0	31.472	37475000	7
A0A024QZP7	CDK1	Cell division cycle 2, G1 to S and G2 to M, isoform CRA_a OS=Homo sapiens OX=9606	34	8	8	7	31.6	31.6	29	34.081	297	297;297;224;189;164;238;298;305;346;39;143;213;239;260;292;324;340;372;393;418;435;448;456;469;470;474;496;523;915;1099;1201;1308;1490;1512	0	54.345	24567000	9
F8VYH9	CDK4	Cyclin-dependent kinase 4 (Fragment) OS=Homo sapiens OX=9606	10	3	2	2	21.2	16.5	16.5	18.685	170	170;201;203;303;132;186;208;74;111;115	0	13.792	4480400	2
Q00534	CDK6	Cyclin-dependent kinase 6 OS=Homo sapiens OX=9606	1	3	2	2	9.8	7.4	7.4	36.938	326	326	0	11.388	2068900	1
Q96G23	CERS2	Ceramide synthase 2 OS=Homo sapiens OX=9606	8	2	2	2	8.9	8.9	8.9	44.876	380	380;128;192;222;228;249;304;377	0	14.677	3454700	2
P23528	CFL1	Cofilin-1 OS=Homo sapiens OX=9606	7	18	18	13	92.2	92.2	66.9	18.502	166	166;159;204;149;90;122;79	0	182.74	337390000	39
Q9Y281	CFL2	Cofilin-2 OS=Homo sapiens OX=9606	3	7	2	2	44	17.5	17.5	18.736	166	166;58;21	0	12.433	2310700	2
Q9H444	CHMP4B	Charged multivesicular body protein 4b OS=Homo sapiens OX=9606	1	6	6	6	27.7	27.7	27.7	24.95	224	224	0	43.925	7119900	5
Q9UHD1	CHORDC1	Cysteine and histidine-rich domain-containing protein 1 OS=Homo sapiens OX=9606	5	7	7	7	26.2	26.2	26.2	37.489	332	332;184;116;120;144	0	64.707	10040000	9
Q9NZ45	CISD1	CDGSH iron-sulfur domain-containing protein 1 OS=Homo sapiens OX=9606	1	2	2	2	20.4	20.4	20.4	12.199	108	108	0	11.699	1121500	2
P12277	CKB	Creatine kinase B-type OS=Homo sapiens OX=9606	5	6	6	6	25.2	25.2	25.2	42.644	381	381;179;90;128;217	0	48.694	10369000	8
O00299	CLIC1	Chloride intracellular channel protein 1 OS=Homo sapiens OX=9606	7	13	13	12	54.8	54.8	52.3	26.922	241	241;133;200;222;242;247;410	0	97.073	68684000	11
E9PMI6	CLNS1A	Chloride channel, nucleotide sensitive 1A OS=Homo sapiens OX=9606	4	2	2	2	18	18	18	18.259	167	167;179;203;237	0	11.971	2492200	1
Q00610	CLTC	Clathrin heavy chain 1 OS=Homo sapiens OX=9606	7	5	5	5	3.5	3.5	3.5	191.61	1675	1675;1679;1260;1640;97;122;612	0	30.308	2014600	3
P10909	CLU	Clusterin OS=Homo sapiens OX=9606	10	4	4	4	13.1	13.1	13.1	52.494	449	449;82;129;135;139;140;204;271;284;297	0	39.981	26450000	4
Q7Z7K0	CMC1	COX assembly mitochondrial protein homolog OS=Homo sapiens OX=9606	1	2	2	2	18.9	18.9	18.9	12.49	106	106	0	11.79	1534500	2
Q5T0D2	CMPK1	Nucleoside-diphosphate kinase OS=Homo sapiens OX=9606	3	2	2	2	14.2	14.2	14.2	18.979	169	169;196;179	0	12.818	1016200	4
Q96KP4	CNDP2	Cytosolic non-specific dipeptidase OS=Homo sapiens OX=9606	3	2	2	2	5.7	5.7	5.7	52.878	475	475;204;249	0	15.413	1886100	2
Q9Y2B0	CNPY2	Protein canopy homolog 2 OS=Homo sapiens OX=9606	5	2	2	2	17.6	17.6	17.6	20.652	182	182;80;102;168;263	0	15.069	1543700	1
Q9BT09	CNPY3	Protein canopy homolog 3 OS=Homo sapiens OX=9606	2	3	3	3	14.7	14.7	14.7	30.748	278	278;143	0	19.908	4006600	3
Q8NBJ5	COLGALT1	Procollagen galactosyltransferase 1 OS=Homo sapiens OX=9606	3	7	7	7	12.2	12.2	12.2	71.635	622	622;138;218	0	48.719	17122000	9
P21964	COMT	Catechol O-methyltransferase OS=Homo sapiens OX=9606	5	3	3	3	18.5	18.5	18.5	30.037	271	271;152;199;223;235	0	23.355	7976600	7
M0R061	COPE	Coatomer subunit epsilon OS=Homo sapiens OX=9606	3	2	2	2	25.3	25.3	25.3	16.453	146	146;308;331	0	14.065	756520	2
D6RD63	COPS4	COP9 signalosome complex subunit 4 (Fragment) OS=Homo sapiens OX=9606	4	3	3	3	11.6	11.6	11.6	31.433	275	275;406;420;438	0	19.245	4815600	3
Q9BR76	CORO1B	Coronin-1B OS=Homo sapiens OX=9606	3	2	2	2	3.9	3.9	3.9	54.234	489	489;260;282	0.0022548	10.617	627380	2
H0YHL7	CORO1C	Coronin-1C (Fragment) OS=Homo sapiens OX=9606	3	2	2	2	18.8	18.8	18.8	18.698	165	165;369;474	0	16.958	3234000	2
Q14019	COTL1	Coactosin-like protein OS=Homo sapiens OX=9606	2	10	10	10	81	81	81	15.945	142	142;73	0	67.933	14165000	11
P13073	COX4I1	Cytochrome c oxidase subunit 4 isoform 1, mitochondrial OS=Homo sapiens OX=9606	6	4	4	4	27.2	27.2	27.2	19.576	169	169;126;139;83;108;43	0	24.014	10241000	3
P20674	COX5A	Cytochrome c oxidase subunit 5A, mitochondrial OS=Homo sapiens OX=9606	5	3	3	3	23.3	23.3	23.3	16.762	150	150;69;111;153;84	0	22.43	4149300	3
P10606	COX5B	Cytochrome c oxidase subunit 5B, mitochondrial OS=Homo sapiens OX=9606	1	2	2	2	24	24	24	13.696	129	129	0	13.429	3404700	2
A6PVH9	CPNE1	Copine-1 OS=Homo sapiens OX=9606	11	2	2	2	7.1	7.1	7.1	53.046	481	481;533;537;542;152;174;201;209;231;304;427	0	22.847	2988400	2
Q9BRF8	CPPED1	Serine/threonine-protein phosphatase CPPED1 OS=Homo sapiens OX=9606	1	2	2	2	7	7	7	35.548	314	314	0	13.365	1292800	3
P31327	CPS1	Carbamoyl-phosphate synthase [ammonia], mitochondrial OS=Homo sapiens OX=9606	2	6	6	6	5.3	5.3	5.3	164.94	1500	1500;513	0	42.38	4021200	4
I3L297	CRK	Adapter molecule crk OS=Homo sapiens OX=9606	2	2	2	2	11.7	11.7	11.7	25.503	223	223;304	0	14.654	1330800	1
C9JP16	CRTAP	Cartilage-associated protein OS=Homo sapiens OX=9606	2	5	5	5	14.2	14.2	14.2	41.432	358	358;401	0	31.359	3661800	6
Q08257	CRYZ	Quinone oxidoreductase OS=Homo sapiens OX=9606	3	2	2	2	9.4	9.4	9.4	35.206	329	329;206;243	0	13.1	739110	1
P55060	CSE1L	Exportin-2 OS=Homo sapiens OX=9606	1	10	10	10	14	14	14	110.42	971	971	0	75.006	16994000	11
Q6UVK1	CSPG4	Chondroitin sulfate proteoglycan 4 OS=Homo sapiens OX=9606	1	2	2	2	1.3	1.3	1.3	250.53	2322	2322	0	11.554	1899400	1
E9PP21	CSRP1	Cysteine and glycine-rich protein 1 OS=Homo sapiens OX=9606	4	3	3	3	33.8	33.8	33.8	16.94	160	160;193;153;153	0	27.197	7459800	3
P04080	CSTB	Cystatin-B OS=Homo sapiens OX=9606	3	3	3	3	45.9	45.9	45.9	11.139	98	98;54;83	0	21.465	9679800	6
P32929	CTH	Cystathionine gamma-lyase OS=Homo sapiens OX=9606	1	8	8	8	31.9	31.9	31.9	44.508	405	405	0	54.795	17956000	8
A0A3B3IRI2	CTPS1	CTP synthase OS=Homo sapiens OX=9606	8	7	7	7	13.1	13.1	13.1	63.723	564	564;591;335;435;451;461;89;111	0	42.014	15009000	5
P10619	CTSA	Lysosomal protective protein OS=Homo sapiens OX=9606	3	2	2	2	6.5	6.5	6.5	54.465	480	480;481;498	0	12.859	1331600	2
Q14247	CTTN	Src substrate cortactin OS=Homo sapiens OX=9606	1	3	3	3	7.5	7.5	7.5	61.585	550	550	0	16.96	665970	3
D6RFH4	CYB5B	Cytochrome b5 type B OS=Homo sapiens OX=9606	5	3	3	3	35.9	35.9	35.9	14.846	131	131;140;146;150;64	0	33.701	27801000	7
P00387	CYB5R3	NADH-cytochrome b5 reductase 3 OS=Homo sapiens OX=9606	2	7	7	7	30.6	30.6	30.6	34.234	301	301;147	0	52.619	42157000	11
C9JFR7	CYCS	Cytochrome c (Fragment) OS=Homo sapiens OX=9606	3	5	5	5	28.7	28.7	28.7	11.333	101	101;105;105	0	30.13	21725000	7
Q9NUQ9	CYRIB	CYFIP-related Rac1 interactor B OS=Homo sapiens OX=9606	3	2	2	2	11.7	11.7	11.7	36.748	324	324;155;218	0	12.51	1964500	2
F5GXX5	DAD1	Dolichyl-diphosphooligosaccharide--protein glycosyltransferase subunit DAD1 OS=Homo sapiens OX=9606	4	2	2	2	25.9	25.9	25.9	9.5541	85	85;113;65;78	0	12.599	1844000	1
Q14118	DAG1	Dystroglycan OS=Homo sapiens OX=9606	1	2	2	2	3.4	3.4	3.4	97.44	895	895	0	12.337	1666300	1
E7ET49	DAGLB	Diacylglycerol lipase-beta OS=Homo sapiens OX=9606	2	3	3	3	5.1	5.1	5.1	68.951	631	631;672	0	19.874	2210500	3
P07108	DBI	Acyl-CoA-binding protein OS=Homo sapiens OX=9606	3	2	2	2	31	31	31	10.044	87	87;97;143	0	14.096	2525600	2
Q16643	DBN1	Drebrin OS=Homo sapiens OX=9606	4	4	4	4	8.8	8.8	8.8	71.428	649	649;317;124;391	0	32.411	3038400	3
Q96C86	DCPS	m7GpppX diphosphatase OS=Homo sapiens OX=9606	2	7	7	7	21.4	21.4	21.4	38.608	337	337;244	0	46.888	12431000	8
O95865	DDAH2	N(G),N(G)-dimethylarginine dimethylaminohydrolase 2 OS=Homo sapiens OX=9606	1	3	3	3	16.8	16.8	16.8	29.644	285	285	0	19.496	3046800	3
Q16531	DDB1	DNA damage-binding protein 1 OS=Homo sapiens OX=9606	7	19	19	19	21.1	21.1	21.1	126.97	1140	1140;1092;139;165;146;109;162	0	127.84	34586000	24
A0A0C4DGS1	DDOST	Dolichyl-diphosphooligosaccharide--protein glycosyltransferase 48 kDa subunit OS=Homo sapiens OX=9606	3	4	4	4	10	10	10	48.799	439	439;456;154	0	25.999	7625200	5
P30046	DDT	D-dopachrome decarboxylase OS=Homo sapiens OX=9606	5	5	5	5	50	50	50	12.712	118	118;132;134;166;50	0	42.673	39784000	7
A0A2R8YDT5	DDX3X	RNA helicase OS=Homo sapiens OX=9606	19	2	2	2	4.4	4.4	4.4	52.797	475	475;476;503;622;629;640;641;647;647;660;660;661;661;662;662;716;733;189;222	0	12.561	2119100	2
B4DFG0	DEK	Protein DEK OS=Homo sapiens OX=9606	7	3	3	3	11	11	11	39.5	347	347;375;380;380;122;285;303	0	20.825	2766000	3
O00273	DFFA	DNA fragmentation factor subunit alpha OS=Homo sapiens OX=9606	2	4	4	4	16.6	16.6	16.6	36.521	331	331;159	0	25.08	2963600	2
P00374	DHFR	Dihydrofolate reductase OS=Homo sapiens OX=9606	4	2	2	2	12.3	12.3	12.3	21.452	187	187;114;129;187	0	12.454	3094700	4
P49366	DHPS	Deoxyhypusine synthase OS=Homo sapiens OX=9606	11	2	2	2	7.9	7.9	7.9	40.97	369	369;370;68;90;132;132;137;139;159;182;277	0	15.496	2121600	2
O43143	DHX15	Pre-mRNA-splicing factor ATP-dependent RNA helicase DHX15 OS=Homo sapiens OX=9606	1	4	4	4	5.9	5.9	5.9	90.932	795	795	0	23.269	3539300	3
X6R9L0	DNAJC3	DnaJ homolog subfamily C member 3 OS=Homo sapiens OX=9606	2	2	2	2	4	4	4	51.911	453	453;504	0.0022831	10.771	2218800	2
O43598	DNPH1	2'-deoxynucleoside 5'-phosphate N-hydrolase 1 OS=Homo sapiens OX=9606	2	3	3	3	14.4	14.4	14.4	19.108	174	174;243	0	28.013	5352200	3
Q9NY33	DPP3	Dipeptidyl peptidase 3 OS=Homo sapiens OX=9606	8	13	13	13	25.6	25.6	25.6	82.588	737	737;756;757;177;201;104;170;90	0	102.54	29384000	15
Q16555	DPYSL2	Dihydropyrimidinase-related protein 2 OS=Homo sapiens OX=9606	3	3	3	3	6.1	6.1	6.1	62.293	572	572;677;170	0	21.769	2063000	3
P60981	DSTN	Destrin OS=Homo sapiens OX=9606	2	9	8	8	43	36.4	36.4	18.506	165	165;135	0	61.991	56093000	12
H0YNW5	DUT	Deoxyuridine 5'-triphosphate nucleotidohydrolase OS=Homo sapiens OX=9606	8	5	5	5	39.5	39.5	39.5	17.827	167	167;221;252;141;133;143;226;107	0	39.853	6974500	4
Q9NR20	DYRK4	Dual specificity tyrosine-phosphorylation-regulated kinase 4 OS=Homo sapiens OX=9606	2	2	2	2	3.3	3.3	3.3	59.608	520	520;634	0	12.164	21374000	2
Q5VTE0	EEF1A1P5	Putative elongation factor 1-alpha-like 3 OS=Homo sapiens OX=9606	6	15	15	7	42.9	42.9	24	50.184	462	462;462;441;426;106;145	0	140.22	409190000	46
Q05639	EEF1A2	Elongation factor 1-alpha 2 OS=Homo sapiens OX=9606	5	14	6	6	42.5	23.8	23.8	50.47	463	463;496;173;152;106	0	65.775	38435000	10
E9PQ49	EEF1D	Elongation factor 1-delta (Fragment) OS=Homo sapiens OX=9606	22	7	7	7	43.9	43.9	43.9	21.824	198	198;204;261;281;130;166;168;187;631;697;106;137;210;238;39;63;139;35;99;119;156;225	0	52.059	18214000	9
P26641	EEF1G	Elongation factor 1-gamma OS=Homo sapiens OX=9606	1	8	8	8	19.5	19.5	19.5	50.118	437	437	0	56.477	42379000	10
P13639	EEF2	Elongation factor 2 OS=Homo sapiens OX=9606	1	38	38	38	44.5	44.5	44.5	95.337	858	858	0	318.65	217230000	60
Q96C19	EFHD2	EF-hand domain-containing protein D2 OS=Homo sapiens OX=9606	6	3	3	3	15	15	15	26.697	240	240;179;81;127;142;239	0	18.811	11376000	5
P00533	EGFR	Epidermal growth factor receptor OS=Homo sapiens OX=9606	11	3	3	3	2.6	2.6	2.6	134.28	1210	1210;1091;1165;128;251;731;979;1055;1255;1266;1308	0	18.325	4961100	3
C9JIJ3	EHD1	EH domain-containing protein 1 (Fragment) OS=Homo sapiens OX=9606	7	2	2	2	13.8	13.8	13.8	16.572	145	145;148;374;534;548;535;543	0	13.268	1026900	2
Q14232	EIF2B1	Translation initiation factor eIF-2B subunit alpha OS=Homo sapiens OX=9606	3	2	2	2	7.2	7.2	7.2	33.712	305	305;152;202	0	12.547	2278000	3
P05198	EIF2S1	Eukaryotic translation initiation factor 2 subunit 1 OS=Homo sapiens OX=9606	3	4	4	4	12.4	12.4	12.4	36.112	315	315;252;273	0	25.105	4951800	6
P20042	EIF2S2	Eukaryotic translation initiation factor 2 subunit 2 OS=Homo sapiens OX=9606	1	2	2	2	5.4	5.4	5.4	38.388	333	333	0	15.645	2045700	2
P41091	EIF2S3	Eukaryotic translation initiation factor 2 subunit 3 OS=Homo sapiens OX=9606	3	11	11	11	32.2	32.2	32.2	51.109	472	472;472;183	0	94.395	29015000	12
Q14152	EIF3A	Eukaryotic translation initiation factor 3 subunit A OS=Homo sapiens OX=9606	1	2	2	2	1.4	1.4	1.4	166.57	1382	1382	0	10.858	770890	1
P55884	EIF3B	Eukaryotic translation initiation factor 3 subunit B OS=Homo sapiens OX=9606	2	4	4	4	6.1	6.1	6.1	92.48	814	814;302	0	25.798	3836200	3
Q99613	EIF3C	Eukaryotic translation initiation factor 3 subunit C OS=Homo sapiens OX=9606	2	2	2	2	3	3	3	105.34	913	913;914	0	13.755	934370	2
H0YDT6	EIF3F	Eukaryotic translation initiation factor 3 subunit F (Fragment) OS=Homo sapiens OX=9606	2	2	2	2	36	36	36	10.807	100	100;357	0	22.095	2462500	1
O75822	EIF3J	Eukaryotic translation initiation factor 3 subunit J OS=Homo sapiens OX=9606	1	2	2	2	8.1	8.1	8.1	29.062	258	258	0	12.324	1848200	2
K7ES31	EIF3K	Eukaryotic translation initiation factor 3 subunit K OS=Homo sapiens OX=9606	5	2	2	2	21.2	21.2	21.2	15.875	137	137;192;218;170;185	0	14.605	1544500	2
P60842	EIF4A1	Eukaryotic initiation factor 4A-I OS=Homo sapiens OX=9606	18	18	18	9	39.9	39.9	20.9	46.153	406	406;341;300;230;257;271;214;362;163;134;187;117;68;85;85;95;98;109	0	145.07	53611000	19
I3L3H2	EIF4A3	RNA helicase OS=Homo sapiens OX=9606	4	6	3	3	13.1	6.7	6.7	44.511	390	390;411;96;97	0	18.42	3275300	2
F8VX11	EIF4B	Eukaryotic translation initiation factor 4B (Fragment) OS=Homo sapiens OX=9606	8	2	2	2	11.4	11.4	11.4	41.454	360	360;611;616;169;175;185;227;275	0	23.12	4307700	3
E7EX73	EIF4G1	Eukaryotic translation initiation factor 4 gamma 1 OS=Homo sapiens OX=9606	11	4	4	4	4.2	4.2	4.2	158.64	1436	1436;1513;1560;1599;903;757;833;869;1585;1621;1774	0	25.865	4309600	3
Q15056	EIF4H	Eukaryotic translation initiation factor 4H OS=Homo sapiens OX=9606	1	3	3	3	19	19	19	27.385	248	248	0	23.895	11148000	4
F8WCJ1	EIF5A2	Eukaryotic translation initiation factor 5A OS=Homo sapiens OX=9606	8	5	5	5	37.1	37.1	37.1	11.687	105	105;109;115;146;153;154;154;186	0	38.915	6873500	4
P56537	EIF6	Eukaryotic translation initiation factor 6 OS=Homo sapiens OX=9606	6	3	3	3	18.8	18.8	18.8	26.599	245	245;108;59;108;110;186	0	33.095	3791100	1
Q15717	ELAVL1	ELAV-like protein 1 OS=Homo sapiens OX=9606	2	2	2	2	8.3	8.3	8.3	36.091	326	326;153	0	12.701	1826700	1
A0A0B4J296	ELOB	Elongin-B OS=Homo sapiens OX=9606	4	4	4	4	48.5	48.5	48.5	7.7561	66	66;118;113;140	0	24.29	10796000	4
E5RHG8	ELOC	Elongin-C (Fragment) OS=Homo sapiens OX=9606	3	3	3	3	47.2	47.2	47.2	9.9601	89	89;112;65	0	25.448	10241000	5
P06733	ENO1	Alpha-enolase OS=Homo sapiens OX=9606	11	45	45	40	85	85	78.6	47.168	434	434;434;195;171;125;83;70;101;33;73;103	0	323.31	968880000	128
P09104	ENO2	Gamma-enolase OS=Homo sapiens OX=9606	2	8	3	3	24.4	8.5	8.5	47.268	434	434;315	0	19.993	10263000	4
P13929	ENO3	Beta-enolase OS=Homo sapiens OX=9606	8	9	4	3	24.9	13.6	11.8	46.986	434	434;283;148;154;196;212;28;58	0	24.387	5607800	4
P07099	EPHX1	Epoxide hydrolase 1 OS=Homo sapiens OX=9606	3	8	8	8	20	20	20	52.948	455	455;136;161	0	48.175	11752000	10
P07814	EPRS1	Bifunctional glutamate/proline--tRNA ligase OS=Homo sapiens OX=9606	1	2	2	2	1.4	1.4	1.4	170.59	1512	1512	0	13.178	541650	2
Q969X5	ERGIC1	Endoplasmic reticulum-Golgi intermediate compartment protein 1 OS=Homo sapiens OX=9606	4	4	4	4	12.8	12.8	12.8	32.592	290	290;55;70;138	0	24.104	19759000	6
Q96HE7	ERO1A	ERO1-like protein alpha OS=Homo sapiens OX=9606	7	13	13	13	32.7	32.7	32.7	54.392	468	468;257;169;75;125;173;467	0	101.21	17045000	14
P30040	ERP29	Endoplasmic reticulum resident protein 29 OS=Homo sapiens OX=9606	2	7	7	7	37.5	37.5	37.5	28.993	261	261;160	0	51.573	46657000	11
Q9BS26	ERP44	Endoplasmic reticulum resident protein 44 OS=Homo sapiens OX=9606	1	11	11	11	35	35	35	46.971	406	406	0	95.54	36488000	14
P62495	ETF1	Eukaryotic peptide chain release factor subunit 1 OS=Homo sapiens OX=9606	5	3	3	3	8	8	8	49.03	437	437;95;208;423;119	0	19.286	4314200	3
P38117	ETFB	Electron transfer flavoprotein subunit beta OS=Homo sapiens OX=9606	1	2	2	2	7.8	7.8	7.8	27.843	255	255	0	12.284	1943200	2
E7EQR4	EZR	Ezrin OS=Homo sapiens OX=9606	2	19	10	10	26.3	16.7	16.7	69.371	586	586;586	0	78.566	23774000	11
B3KT28	FAF1	FAS-associated factor 1 OS=Homo sapiens OX=9606	3	2	2	2	6.9	6.9	6.9	53.653	464	464;490;650	0	14.061	1969600	2
P16930	FAH	Fumarylacetoacetase OS=Homo sapiens OX=9606	2	2	2	2	5.3	5.3	5.3	46.374	419	419;161	0	13.168	0	2
Q8IWE2	FAM114A1	Protein NOXP20 OS=Homo sapiens OX=9606	1	3	3	3	7.3	7.3	7.3	60.741	563	563	0	16.414	1994800	3
F8W7Q4	FAM162A	Protein FAM162A OS=Homo sapiens OX=9606	3	2	2	2	21.5	21.5	21.5	16.515	144	144;154;141	0	13.806	4084300	1
A0A0U1RQF0	FASN	3-hydroxyacyl-[acyl-carrier-protein] dehydratase OS=Homo sapiens OX=9606	2	5	5	5	4.2	4.2	4.2	273.2	2509	2509;2511	0	30.062	4378800	4
P62861	FAU	40S ribosomal protein S30 OS=Homo sapiens OX=9606	2	3	3	3	20.3	20.3	20.3	6.6478	59	59;98	0	18.882	6365500	2
A0A286YF37	FBXO2	F-box only protein 2 (Fragment) OS=Homo sapiens OX=9606	3	3	3	3	14.6	14.6	14.6	30.299	268	268;296;120	0	22.762	5443900	3
Q8NEZ5	FBXO22	F-box only protein 22 OS=Homo sapiens OX=9606	6	4	4	4	13.9	13.9	13.9	44.508	403	403;78;93;153;160;241	0	32.966	5348800	4
P14324	FDPS	Farnesyl pyrophosphate synthase OS=Homo sapiens OX=9606	5	10	10	10	30.8	30.8	30.8	48.275	419	419;174;248;274;80	0	101.81	115990000	17
P39748	FEN1	Flap endonuclease 1 OS=Homo sapiens OX=9606	3	2	2	2	7.1	7.1	7.1	42.592	380	380;154;165	0	11.908	1477300	1
Q96AY3	FKBP10	Peptidyl-prolyl cis-trans isomerase FKBP10 OS=Homo sapiens OX=9606	2	5	5	5	11.2	11.2	11.2	64.244	582	582;386	0	32.64	18291000	6
Q5W0X3	FKBP1A	Peptidylprolyl isomerase OS=Homo sapiens OX=9606	4	2	2	2	31.1	31.1	31.1	11.424	103	103;108;92;129	0	14.114	7232700	2
Q02790	FKBP4	Peptidyl-prolyl cis-trans isomerase FKBP4 OS=Homo sapiens OX=9606	4	20	20	20	51.2	51.2	51.2	51.804	459	459;86;84;51	0	166.3	72350000	26
O95302	FKBP9	Peptidyl-prolyl cis-trans isomerase FKBP9 OS=Homo sapiens OX=9606	3	2	2	2	3.7	3.7	3.7	63.083	570	570;142;225	0.0022701	10.701	2791400	0
A0A087WWY3	FLNA	Filamin-A OS=Homo sapiens OX=9606	5	26	26	26	15.2	15.2	15.2	245.85	2315	2315;2620;2647;604;232	0	173.68	41299000	24
E7EN95	FLNB	Filamin-B OS=Homo sapiens OX=9606	4	5	5	5	3.1	3.1	3.1	256.28	2409	2409;2602;72;195	0	30.724	3421300	4
I3L4I0	FLYWCH2	FLYWCH family member 2 (Fragment) OS=Homo sapiens OX=9606	3	2	2	2	20.9	20.9	20.9	9.56	91	91;140;144	0	11.179	1603200	1
P15328	FOLR1	Folate receptor alpha OS=Homo sapiens OX=9606	1	11	11	11	45.9	45.9	45.9	29.819	257	257	0	84.544	55491000	12
P85037	FOXK1	Forkhead box protein K1 OS=Homo sapiens OX=9606	1	6	6	6	8.5	8.5	8.5	75.456	733	733	0	37.226	7002400	5
Q16658	FSCN1	Fascin OS=Homo sapiens OX=9606	4	11	11	11	24.7	24.7	24.7	54.529	493	493;120;132;137	0	92.772	63298000	18
G3V192	FTH1	Ferritin OS=Homo sapiens OX=9606	6	6	6	6	46.4	46.4	46.4	17.653	153	153;183;113;58;95;114	0	50.231	23974000	10
A0A1B0GTY1	FTO	Alpha-ketoglutarate-dependent dioxygenase FTO OS=Homo sapiens OX=9606	9	4	4	4	14	14	14	48.605	421	421;450;455;457;481;505;533;559;275	0	26.696	6377900	5
P35637	FUS	RNA-binding protein FUS OS=Homo sapiens OX=9606	2	2	2	2	7.6	7.6	7.6	53.425	526	526;527	0	12.763	1574300	2
Q13283	G3BP1	Ras GTPase-activating protein-binding protein 1 OS=Homo sapiens OX=9606	2	3	3	3	7.5	7.5	7.5	52.164	466	466;148	0	18.4	3233100	3
P11413	G6PD	Glucose-6-phosphate 1-dehydrogenase OS=Homo sapiens OX=9606	4	26	26	26	54	54	54	59.256	515	515;338;256;320	0	241.6	107830000	37
Q14376	GALE	UDP-glucose 4-epimerase OS=Homo sapiens OX=9606	5	2	2	2	6	6	6	38.281	348	348;108;194;227;239	0	13.157	1759100	1
Q96C23	GALM	Galactose mutarotase OS=Homo sapiens OX=9606	4	3	3	3	8.5	8.5	8.5	37.765	342	342;194;194;218	0	18.132	2607300	2
Q14697	GANAB	Neutral alpha-glucosidase AB OS=Homo sapiens OX=9606	4	38	38	38	47.7	47.7	47.7	106.87	944	944;847;852;119	0	323.31	347010000	62
P04406	GAPDH	Glyceraldehyde-3-phosphate dehydrogenase OS=Homo sapiens OX=9606	2	36	36	35	90.1	90.1	90.1	36.053	335	335;260	0	323.31	977840000	120
P41250	GARS1	Glycine--tRNA ligase OS=Homo sapiens OX=9606	2	26	26	26	39.2	39.2	39.2	83.165	739	739;77	0	212.31	162450000	53
P22102	GART	Trifunctional purine biosynthetic protein adenosine-3 OS=Homo sapiens OX=9606	7	6	6	6	8.8	8.8	8.8	107.77	1010	1010;136;138;231;241;306;223	0	45.709	6334100	6
A0A0G2JNZ5	GBA	Glucosylceramidase OS=Homo sapiens OX=9606	4	5	5	5	10.2	10.2	10.2	50.263	449	449;536;536;487	0	29.18	12268000	5
Q9Y2T3	GDA	Guanine deaminase OS=Homo sapiens OX=9606	5	29	29	29	74.7	74.7	74.7	51.002	454	454;393;176;179;195	0	310.25	190520000	39
P31150	GDI1	Rab GDP dissociation inhibitor alpha OS=Homo sapiens OX=9606	2	12	5	5	34	18.8	18.8	50.582	447	447;147	0	36.476	4309200	5
P50395	GDI2	Rab GDP dissociation inhibitor beta OS=Homo sapiens OX=9606	7	19	19	12	49.9	49.9	34.6	50.663	445	445;263;130;148;203;155;125	0	175.5	84566000	27
E9PKL9	GFUS	GDP-4-keto-6-deoxy-D-mannose-3,5-epimerase-4-reductase (Fragment) OS=Homo sapiens OX=9606	6	2	2	2	8.6	8.6	8.6	29.666	268	268;321;33;118;198;221	0	14.016	2144300	2
H3BM42	GLG1	Golgi apparatus protein 1 OS=Homo sapiens OX=9606	2	2	2	2	3.9	3.9	3.9	79.317	698	698;1179	0	15.842	1097000	1
Q04760	GLO1	Lactoylglutathione lyase OS=Homo sapiens OX=9606	1	5	5	5	26.1	26.1	26.1	20.777	184	184	0	33.346	30060000	8
O60547	GMDS	GDP-mannose 4,6 dehydratase OS=Homo sapiens OX=9606	1	2	2	2	5.9	5.9	5.9	41.949	372	372	0	11.831	1792600	2
P49915	GMPS	GMP synthase [glutamine-hydrolyzing] OS=Homo sapiens OX=9606	1	7	7	7	14.3	14.3	14.3	76.715	693	693	0	48.821	6126900	5
P04899	GNAI2	Guanine nucleotide-binding protein G(i) subunit alpha-2 OS=Homo sapiens OX=9606	1	6	5	4	23.9	20.8	17.5	40.45	355	355	0	34.443	9121500	7
P08754	GNAI3	Guanine nucleotide-binding protein G(i) subunit alpha OS=Homo sapiens OX=9606	1	4	2	2	13.6	7.1	7.1	40.532	354	354	0	13.888	3697600	2
P63092	GNAS	Guanine nucleotide-binding protein G(s) subunit alpha isoforms short OS=Homo sapiens OX=9606	20	8	8	7	26.1	26.1	23.4	45.664	394	394;1037;158;160;381;54;61;61;84;87;93;104;123;146;148;193;199;350;354;354	0	51.478	23470000	9
P62873	GNB1	Guanine nucleotide-binding protein G(I)/G(S)/G(T) subunit beta-1 OS=Homo sapiens OX=9606	11	7	7	4	30	30	18.5	37.377	340	340;165;107;163;240;79;232;232;264;339;340	0	53.861	15912000	8
C9JIS1	GNB2	Guanine nucleotide-binding protein G(I)/G(S)/G(T) subunit beta-2 (Fragment) OS=Homo sapiens OX=9606	7	5	2	2	27.6	10.8	10.8	25.538	232	232;251;296;340;152;340;165	0	14.005	6560000	2
O00461	GOLIM4	Golgi integral membrane protein 4 OS=Homo sapiens OX=9606	2	3	3	3	6.2	6.2	6.2	81.879	696	696;668	0	22.909	2495400	3
P17174	GOT1	Aspartate aminotransferase, cytoplasmic OS=Homo sapiens OX=9606	1	19	19	19	56.4	56.4	56.4	46.247	413	413	0	177.62	136290000	25
P00505	GOT2	Aspartate aminotransferase, mitochondrial OS=Homo sapiens OX=9606	1	9	9	9	29.1	29.1	29.1	47.517	430	430	0	63.071	26340000	9
P43304	GPD2	Glycerol-3-phosphate dehydrogenase, mitochondrial OS=Homo sapiens OX=9606	2	4	4	4	7.4	7.4	7.4	80.852	727	727;379	0	25.763	3773400	4
P06744	GPI	Glucose-6-phosphate isomerase OS=Homo sapiens OX=9606	20	23	23	17	60.8	60.8	50.5	63.146	558	558;573;597;447;268;316;283;279;166;159;170;162;145;146;161;139;116;133;110;209	0	236.13	92898000	23
A0A2R8Y6B6	GPX1	Glutathione peroxidase 1 OS=Homo sapiens OX=9606	3	2	2	2	19.1	19.1	19.1	16.914	157	157;202;203	0	13.473	2348100	5
E7ETY7	GPX8	Glutathione peroxidase OS=Homo sapiens OX=9606	2	4	4	4	21.5	21.5	21.5	18.09	158	158;209	0	23.764	7344700	4
Q9UBQ7	GRHPR	Glyoxylate reductase/hydroxypyruvate reductase OS=Homo sapiens OX=9606	2	3	3	3	18.3	18.3	18.3	35.668	328	328;358	0	17.43	2283600	3
O60443	GSDME	Gasdermin-E OS=Homo sapiens OX=9606	2	3	3	3	9.9	9.9	9.9	54.554	496	496;356	0	17.755	2437000	2
H3BR35	GSPT1	Eukaryotic peptide chain release factor GTP-binding subunit ERF3A (Fragment) OS=Homo sapiens OX=9606	4	4	4	4	9.7	9.7	9.7	52.832	475	475;499;628;199	0	28.987	8931100	4
P00390	GSR	Glutathione reductase, mitochondrial OS=Homo sapiens OX=9606	3	5	5	5	15.7	15.7	15.7	56.256	522	522;123;131	0	40.438	7207300	7
A0A2R8Y430	GSS	Glutathione synthetase OS=Homo sapiens OX=9606	13	14	14	14	34.7	34.7	34.7	49.976	450	450;474;360;169;155;134;48;81;97;112;124;132;30	0	109.81	51513000	16
P21266	GSTM3	Glutathione S-transferase Mu 3 OS=Homo sapiens OX=9606	2	12	12	11	56.9	56.9	56.9	26.559	225	225;212	0	90.476	33185000	13
P78417	GSTO1	Glutathione S-transferase omega-1 OS=Homo sapiens OX=9606	3	12	12	12	38.2	38.2	38.2	27.566	241	241;200;180	0	90.92	70141000	16
P09211	GSTP1	Glutathione S-transferase P OS=Homo sapiens OX=9606	5	8	8	8	51	51	51	23.356	210	210;174;79;58;69	0	76.905	62219000	14
P16401	H1-5	Histone H1.5 OS=Homo sapiens OX=9606	1	6	6	6	24.8	24.8	24.8	22.58	226	226	0	37.877	7742900	4
Q93077	H2AC6	Histone H2A type 1-C OS=Homo sapiens OX=9606	10	6	6	2	35.4	35.4	13.8	14.105	130	130;130;130;131;140;143;122;127;76;130	0	47.422	63578000	9
Q99879	H2BC14	Histone H2B type 1-M OS=Homo sapiens OX=9606	12	9	9	3	50.8	50.8	9.5	13.989	126	126;126;126;126;126;126;126;166;126;126;127;122	0	69.412	92347000	12
Q16778	H2BC21	Histone H2B type 2-E OS=Homo sapiens OX=9606	7	8	2	2	49.2	7.9	7.9	13.92	126	126;126;126;126;126;164;193	0	12.887	9081900	2
P62805	H4-16	Histone H4 OS=Homo sapiens OX=9606	1	14	14	14	62.1	62.1	62.1	11.367	103	103	0	127.57	234800000	26
B3KWE1	HARS1	Histidine--tRNA ligase OS=Homo sapiens OX=9606	11	7	7	7	18.9	18.9	18.9	49.623	440	440;509;435;395;288;334;399;436;473;506;512	0	42.679	5203200	8
V9GYS5	HDDC2	5'-deoxynucleotidase HDDC2 OS=Homo sapiens OX=9606	3	2	2	2	19.6	19.6	19.6	12.276	107	107;108;204	0	14.097	2191400	2
P51858	HDGF	Hepatoma-derived growth factor OS=Homo sapiens OX=9606	1	5	5	5	30.4	30.4	30.4	26.788	240	240	0	40.449	14435000	5
Q9NRV9	HEBP1	Heme-binding protein 1 OS=Homo sapiens OX=9606	4	7	7	7	43.9	43.9	43.9	21.097	189	189;207;133;62	0	55.883	14410000	9
H3BS10	HEXA	Beta-hexosaminidase OS=Homo sapiens OX=9606	6	8	8	8	21	21	21	58.44	509	509;529;540;318;373;227	0	64.946	16851000	12
P07686	HEXB	Beta-hexosaminidase subunit beta OS=Homo sapiens OX=9606	6	8	8	8	14.9	14.9	14.9	63.111	556	556;331;170;202;35;52	0	69.497	22065000	10
Q53FT3	HIKESHI	Protein Hikeshi OS=Homo sapiens OX=9606	4	4	4	4	22.8	22.8	22.8	21.627	197	197;131;194;92	0	36.21	3223600	3
P01891	HLA-A	#N/A	41	11	11	2	44.4	44.4	7.1	40.908	365	365;299;299;325;326;339;342;365;365;365;365;365;365;365;299;325;365;365;371;299;339;362;365;365;367;371;394;362;362;362;362;362;241;241;241;241;362;362;49;80;80	0	81.939	18772000	11
Q8TCT9	HM13	Minor histocompatibility antigen H13 OS=Homo sapiens OX=9606	6	2	2	2	9.5	9.5	9.5	41.488	377	377;420;143;272;345;365	0	13.439	3066800	2
F5H345	HMBS	Hydroxymethylbilane synthase OS=Homo sapiens OX=9606	13	3	3	3	12.1	12.1	12.1	35.761	330	330;338;355;361;151;187;190;191;218;228;63;81;119	0	18.782	5084800	3
Q5T7C4	HMGB1	High mobility group protein B1 OS=Homo sapiens OX=9606	5	9	9	9	48.7	48.7	48.7	18.311	158	158;215;211;134;209	0	68.704	56719000	13
Q01581	HMGCS1	Hydroxymethylglutaryl-CoA synthase, cytoplasmic OS=Homo sapiens OX=9606	3	7	7	7	23.1	23.1	23.1	57.293	520	520;95;508	0	61.767	15380000	11
I3L159	HMOX2	Heme oxygenase (biliverdin-producing) (Fragment) OS=Homo sapiens OX=9606	5	3	3	3	17.9	17.9	17.9	26.578	229	229;238;316;370;110	0	28.137	2277300	1
F8W6I7	HNRNPA1	Helix-destabilizing protein OS=Homo sapiens OX=9606	9	7	7	7	36.8	36.8	36.8	33.155	307	307;372;231;145;156;320;191;275;113	0	50.387	6765400	7
P22626	HNRNPA2B1	Heterogeneous nuclear ribonucleoproteins A2/B1 OS=Homo sapiens OX=9606	2	9	9	9	34	34	34	37.429	353	353;261	0	63.959	15586000	8
P51991	HNRNPA3	Heterogeneous nuclear ribonucleoprotein A3 OS=Homo sapiens OX=9606	1	2	2	2	10.8	10.8	10.8	39.594	378	378	0	13.816	1886500	2
G3V576	HNRNPC	Heterogeneous nuclear ribonucleoproteins C1/C2 OS=Homo sapiens OX=9606	23	5	5	5	22.9	22.9	22.9	25.256	231	231;262;288;290;292;305;306;175;187;66;117;121;126;147;54;180;214;293;293;293;293;293;293	0	34.718	13928000	7
H0YA96	HNRNPD	Heterogeneous nuclear ribonucleoprotein D0 (Fragment) OS=Homo sapiens OX=9606	7	3	3	3	17.6	17.6	17.6	23.811	210	210;260;355;111;221;92;155	0	19.775	10027000	4
P52597	HNRNPF	Heterogeneous nuclear ribonucleoprotein F OS=Homo sapiens OX=9606	2	2	2	2	7	7	7	45.671	415	415;98	0	12.593	3519000	4
E9PCY7	HNRNPH1	Heterogeneous nuclear ribonucleoprotein H OS=Homo sapiens OX=9606	21	4	4	4	12.1	12.1	12.1	47.087	429	429;449;472;155;164;212;100;115;130;131;161;163;168;171;172;184;277;449;166;185;194	0	24.093	3356500	4
Q5T6W2	HNRNPK	Heterogeneous nuclear ribonucleoprotein K (Fragment) OS=Homo sapiens OX=9606	4	11	11	11	33.5	33.5	33.5	41.807	379	379;463;77;100	0	78.18	23239000	13
M0QZM1	HNRNPM	Heterogeneous nuclear ribonucleoprotein M (Fragment) OS=Homo sapiens OX=9606	5	2	2	2	7.8	7.8	7.8	39.933	383	383;730;730;116;214	0	12.515	3042700	2
O43390	HNRNPR	Heterogeneous nuclear ribonucleoprotein R OS=Homo sapiens OX=9606	2	5	2	2	8.4	3.5	3.5	70.942	633	633;494	0	13.006	1650000	2
A0A1W2PP35	HNRNPU	Heterogeneous nuclear ribonucleoprotein U (Fragment) OS=Homo sapiens OX=9606	14	9	9	9	15.8	15.8	15.8	80.648	728	728;804;825;602;744;527;546;547;549;302;327;372;128;181	0	71.177	31605000	12
P00492	HPRT1	Hypoxanthine-guanine phosphoribosyltransferase OS=Homo sapiens OX=9606	2	13	13	13	68.8	68.8	68.8	24.579	218	218;225	0	117.94	61714000	14
P07900	HSP90AA1	Heat shock protein HSP 90-alpha OS=Homo sapiens OX=9606	6	64	43	43	59.4	42.9	42.9	84.659	732	732;174;343;334;418;1859	0	323.31	539690000	74
P08238	HSP90AB1	Heat shock protein HSP 90-beta OS=Homo sapiens OX=9606	3	66	66	39	62.6	62.6	47.5	83.263	724	724;597;505	0	323.31	1156400000	155
Q58FF8	HSP90AB2P	Putative heat shock protein HSP 90-beta 2 OS=Homo sapiens OX=9606	1	15	2	2	23.9	4.5	4.5	44.348	381	381	0	23.106	55126000	8
P14625	HSP90B1	Endoplasmin OS=Homo sapiens OX=9606	6	51	49	49	60.6	58.9	58.9	92.468	803	803;315;315;147;399;48	0	323.31	570980000	78
P0DMV9	HSPA1B	Heat shock 70 kDa protein 1B OS=Homo sapiens OX=9606	4	31	28	19	44.5	39.9	26.8	70.051	641	641;641;642;476	0	234.62	243320000	51
P34932	HSPA4	Heat shock 70 kDa protein 4 OS=Homo sapiens OX=9606	3	36	36	33	49.5	49.5	46.5	94.33	840	840;699;475	0	323.01	205850000	58
O95757	HSPA4L	Heat shock 70 kDa protein 4L OS=Homo sapiens OX=9606	3	8	4	4	10.7	6.1	6.1	94.511	839	839;813;531	0	28.447	4676700	4
P11021	HSPA5	Endoplasmic reticulum chaperone BiP OS=Homo sapiens OX=9606	3	50	50	49	62.4	62.4	62.4	72.332	654	654;303;777	0	323.31	746350000	78
A8K7Q2	HSPA8	Heat shock cognate 71 kDa protein OS=Homo sapiens OX=9606	1	20	2	2	37.8	2.4	2.4	45.338	410	410	0	14.198	7692400	2
P11142	HSPA8	Heat shock cognate 71 kDa protein OS=Homo sapiens OX=9606	14	38	37	17	53.1	53.1	26	70.897	646	646;627;500;312;187;171;178;183;137;132;168;639;223;150	0	323.31	512650000	63
P38646	HSPA9	Stress-70 protein, mitochondrial OS=Homo sapiens OX=9606	4	3	3	3	5.7	5.7	5.7	73.68	679	679;62;95;180	0	18.74	4078300	2
P04792	HSPB1	Heat shock protein beta-1 OS=Homo sapiens OX=9606	3	9	9	9	56.1	56.1	56.1	22.782	205	205;186;37	0	78.206	49603000	19
Q9NZL4	HSPBP1	Hsp70-binding protein 1 OS=Homo sapiens OX=9606	1	2	2	2	7	7	7	39.302	359	359	0	12.954	912330	1
P10809	HSPD1	60 kDa heat shock protein, mitochondrial OS=Homo sapiens OX=9606	7	15	15	15	37	37	37	61.054	573	573;234;221;175;94;58;83	0	119.31	35616000	19
B8ZZL8	HSPE1	10 kDa heat shock protein, mitochondrial OS=Homo sapiens OX=9606	3	2	2	2	20.8	20.8	20.8	10.689	101	101;102;261	0	10.936	3480100	2
Q92598	HSPH1	Heat shock protein 105 kDa OS=Homo sapiens OX=9606	6	22	19	18	25.1	22.1	22.1	96.864	858	858;782;115;115;436;2849	0	136.35	59005000	23
E9PI87	HTATIP2	Oxidoreductase HTATIP2 OS=Homo sapiens OX=9606	2	5	5	5	26.5	26.5	26.5	21.976	196	196;242	0	36.306	10929000	6
Q7Z6Z7	HUWE1	E3 ubiquitin-protein ligase HUWE1 OS=Homo sapiens OX=9606	2	4	4	4	1.1	1.1	1.1	481.89	4374	4374;1197	0	23.846	2827400	4
A0A087X054	HYOU1	Hypoxia up-regulated protein 1 OS=Homo sapiens OX=9606	13	37	37	37	40.8	40.8	40.8	104.78	937	937;999;1000;656;677;678;224;211;147;149;154;102;92	0	295.16	176880000	45
Q5T5N3	IDE	Insulin-degrading enzyme (Fragment) OS=Homo sapiens OX=9606	3	2	2	2	10.5	10.5	10.5	29.15	257	257;1019;1019	0	12.348	2549700	1
O75874	IDH1	Isocitrate dehydrogenase [NADP] cytoplasmic OS=Homo sapiens OX=9606	4	7	7	7	19.8	19.8	19.8	46.659	414	414;157;62;73	0	51.268	14437000	11
P11717	IGF2R	Cation-independent mannose-6-phosphate receptor OS=Homo sapiens OX=9606	1	2	2	2	1	1	1	274.37	2491	2491	0	11.864	466800	2
Q14116	IL18	Interleukin-18 OS=Homo sapiens OX=9606	1	9	9	9	62.2	62.2	62.2	22.326	193	193	0	60.818	81954000	13
B4DY09	ILF2	Interleukin enhancer-binding factor 2 OS=Homo sapiens OX=9606	4	3	3	3	11.1	11.1	11.1	38.91	352	352;390;115;150	0	18.433	3674600	2
Q12906	ILF3	Interleukin enhancer-binding factor 3 OS=Homo sapiens OX=9606	8	5	5	5	7.2	7.2	7.2	95.337	894	894;254;77;79;99;122;161;180	0	31.415	7184800	7
H0YBL1	IMPA1	Inositol-1-monophosphatase (Fragment) OS=Homo sapiens OX=9606	4	3	3	3	12.1	12.1	12.1	28.529	265	265;277;153;180	0	19.296	1106500	2
A0A3B3IRL5	IMPDH1	Inosine-5'-monophosphate dehydrogenase (Fragment) OS=Homo sapiens OX=9606	7	3	2	2	8.6	7.1	7.1	54.272	509	509;513;514;289;184;190;226	0	28.031	1539800	1
P12268	IMPDH2	Inosine-5'-monophosphate dehydrogenase 2 OS=Homo sapiens OX=9606	3	14	14	13	40.3	40.3	38.7	55.804	514	514;470;279	0	112.23	34598000	16
O00410	IPO5	Importin-5 OS=Homo sapiens OX=9606	18	21	21	21	26.8	26.8	26.8	123.63	1097	1097;1099;170;182;57;70;74;80;88;99;101;124;126;34;36;45;46;1105	0	152.42	30759000	21
O95373	IPO7	Importin-7 OS=Homo sapiens OX=9606	1	10	10	10	9.6	9.6	9.6	119.52	1038	1038	0	91.045	8519000	7
Q96P70	IPO9	Importin-9 OS=Homo sapiens OX=9606	1	4	4	4	4.4	4.4	4.4	115.96	1041	1041	0	26.818	3752900	5
P46940	IQGAP1	Ras GTPase-activating-like protein IQGAP1 OS=Homo sapiens OX=9606	12	32	32	32	24	24	24	189.25	1657	1657;1191;1085;1402;1525;1575;43;48;107;509;1588;1631	0	234.24	61420000	39
Q8WZA9	IRGQ	Immunity-related GTPase family Q protein OS=Homo sapiens OX=9606	2	4	4	4	10.4	10.4	10.4	62.717	623	623;136	0	29.182	6110400	3
P08648	ITGA5	Integrin alpha-5 OS=Homo sapiens OX=9606	1	4	4	4	6.6	6.6	6.6	114.54	1049	1049	0	24.494	6613100	5
P06756	ITGAV	Integrin alpha-V OS=Homo sapiens OX=9606	1	3	3	3	2.5	2.5	2.5	116.04	1048	1048	0	16.448	1912400	0
P05556	ITGB1	Integrin beta-1 OS=Homo sapiens OX=9606	7	7	7	7	8.8	8.8	8.8	88.414	798	798;98;136;143;152;163;124	0	47.006	22108000	10
H3BMT0	JPT2	Jupiter microtubule-associated homolog 2 (Fragment) OS=Homo sapiens OX=9606	6	2	2	2	24.3	24.3	24.3	12.23	115	115;116;167;178;190;190	0	10.855	3041800	2
Q15046	KARS1	Lysine--tRNA ligase OS=Homo sapiens OX=9606	5	5	5	5	9.7	9.7	9.7	68.047	597	597;256;76;102;104	0	37.133	7622500	5
Q96CX2	KCTD12	BTB/POZ domain-containing protein KCTD12 OS=Homo sapiens OX=9606	1	3	3	3	11.1	11.1	11.1	35.7	325	325	0	35.319	3162900	3
P52292	KPNA2	Importin subunit alpha-1 OS=Homo sapiens OX=9606	3	10	10	10	28.2	28.2	28.2	57.861	529	529;134;143	0	76.703	30475000	13
Q5TFJ7	KPNA6	Importin subunit alpha-7 (Fragment) OS=Homo sapiens OX=9606	10	2	2	2	5.6	5.6	5.6	35.457	321	321;328;536;538;169;174;182;186;214;536	0.0022573	10.628	305380	1
Q14974	KPNB1	Importin subunit beta-1 OS=Homo sapiens OX=9606	6	20	20	20	27.7	27.7	27.7	97.169	876	876;690;148;248;22;60	0	158.51	89100000	22
P04264	KRT1	Keratin, type II cytoskeletal 1 OS=Homo sapiens OX=9606	2	24	24	16	35.2	35.2	28	66.038	644	644;644	0	247.17	88200000	27			+
P13645	KRT10	Keratin, type I cytoskeletal 10 OS=Homo sapiens OX=9606	46	25	25	19	45.2	45.2	40.9	58.826	584	584;593;570;437;464;464;486;165;206;415;420;423;450;450;458;459;459;494;494;391;404;404;416;416;416;416;425;425;430;448;448;449;453;455;455;456;456;458;467;467;468;468;471;476;525;525	0	233.81	114320000	29			+
P02533	KRT14	Keratin, type I cytoskeletal 14 OS=Homo sapiens OX=9606	25	14	8	2	24.4	19.1	5.5	51.561	472	472;472;473;473;456;349;196;400;400;452;403;456;456;469;474;95;181;48;93;98;220;291;424;424;431	0	58.785	13925000	8			+
P35908	KRT2	Keratin, type II cytoskeletal 2 epidermal OS=Homo sapiens OX=9606	39	19	17	10	33.8	30.7	20.3	65.432	639	639;645;535;535;638;524;531;539;572;578;578;638;119;196;201;273;289;457;469;469;469;483;483;511;511;520;523;523;525;529;529;534;540;540;543;594;600;600;600	0	142.58	51951000	18			+
P35527	KRT9	Keratin, type I cytoskeletal 9 OS=Homo sapiens OX=9606	3	10	9	9	20.7	19.6	19.6	62.064	623	623;623;390	0	84.525	30944000	13			+
P32004	L1CAM	Neural cell adhesion molecule L1 OS=Homo sapiens OX=9606	2	5	5	5	4.9	4.9	4.9	140	1257	1257;190	0	28.918	8552800	4
F5GX19	LAMTOR1	Late endosomal/lysosomal adaptor and MAPK and MTOR activator 1 OS=Homo sapiens OX=9606	5	2	2	2	19.7	19.7	19.7	15.687	142	142;160;161;79;99	0	12.47	1277700	1
Q9UHA4	LAMTOR3	Ragulator complex protein LAMTOR3 OS=Homo sapiens OX=9606	1	2	2	2	41.1	41.1	41.1	13.623	124	124	0	12.688	2124300	2
C9J9W2	LASP1	LIM and SH3 domain protein 1 (Fragment) OS=Homo sapiens OX=9606	3	4	4	4	31.9	31.9	31.9	18.98	166	166;261;91	0	28.381	4076700	5
P00338	LDHA	L-lactate dehydrogenase A chain OS=Homo sapiens OX=9606	17	40	40	35	93.1	93.1	84.9	36.688	332	332;156;144;114;89;94;72;42;45;45;46;183;225;241;318;332;381	0	323.31	982860000	52
A0A087WUM2	LDHAL6A	L-lactate dehydrogenase OS=Homo sapiens OX=9606	2	5	2	2	12	5.2	5.2	25.497	233	233;332	0	11.242	15506000	2
P07195	LDHB	L-lactate dehydrogenase B chain OS=Homo sapiens OX=9606	5	34	30	30	72.2	70.4	70.4	36.638	334	334;281;232;136;102	0	323.31	608140000	73
P09382	LGALS1	Galectin-1 OS=Homo sapiens OX=9606	2	9	9	9	67.4	67.4	67.4	14.716	135	135;38	0	83.774	18707000	6
P17931	LGALS3	Galectin-3 OS=Homo sapiens OX=9606	2	5	5	5	23.2	23.2	23.2	26.152	250	250;233	0	37.528	11963000	5
F8VS07	LIMA1	LIM domain and actin-binding protein 1 OS=Homo sapiens OX=9606	3	2	2	2	6.6	6.6	6.6	51.09	456	456;598;759	0	19.637	1791900	3
P49257	LMAN1	Protein ERGIC-53 OS=Homo sapiens OX=9606	1	3	3	3	12.4	12.4	12.4	57.548	510	510	0	23.325	1982200	5
Q12907	LMAN2	Vesicular integral-membrane protein VIP36 OS=Homo sapiens OX=9606	5	4	4	4	12.9	12.9	12.9	40.228	356	356;325;191;203;288	0	30.014	14798000	4
Q5TCI8	LMNA	Prelamin-A/C OS=Homo sapiens OX=9606	4	2	2	2	5.7	5.7	5.7	55.762	491	491;664;260;487	0	14.111	4692500	1
Q8NF37	LPCAT1	Lysophosphatidylcholine acyltransferase 1 OS=Homo sapiens OX=9606	3	7	7	7	15.5	15.5	15.5	59.151	534	534;234;489	0	50.15	10488000	7
Q07954	LRP1	Prolow-density lipoprotein receptor-related protein 1 OS=Homo sapiens OX=9606	1	4	4	4	1	1	1	504.6	4544	4544	0	23.84	503990	2
P30533	LRPAP1	Alpha-2-macroglobulin receptor-associated protein OS=Homo sapiens OX=9606	2	5	5	5	17.9	17.9	17.9	41.465	357	357;279	0	31.497	10213000	8
Q96AG4	LRRC59	Leucine-rich repeat-containing protein 59 OS=Homo sapiens OX=9606	1	3	3	3	11.4	11.4	11.4	34.93	307	307	0	20.818	4561300	3
P48449	LSS	Lanosterol synthase OS=Homo sapiens OX=9606	4	7	7	7	12.6	12.6	12.6	83.308	732	732;262;549;78	0	42.179	11120000	7
P09960	LTA4H	Leukotriene A-4 hydrolase OS=Homo sapiens OX=9606	2	12	12	12	25.5	25.5	25.5	69.284	611	611;132	0	80.292	22821000	13
P55145	MANF	Mesencephalic astrocyte-derived neurotrophic factor OS=Homo sapiens OX=9606	2	2	2	2	17	17	17	20.7	182	182;185	0	15.025	15133000	5
Q02750	MAP2K1	Dual specificity mitogen-activated protein kinase kinase 1 OS=Homo sapiens OX=9606	1	4	2	2	9.4	3.3	3.3	43.439	393	393	0	15.916	2930500	2
P36507	MAP2K2	Dual specificity mitogen-activated protein kinase kinase 2 OS=Homo sapiens OX=9606	4	5	5	3	13	13	7	44.424	400	400;303;405;104	0	30.415	10827000	4
P27816	MAP4	Microtubule-associated protein 4 OS=Homo sapiens OX=9606	7	12	12	12	16.4	16.4	16.4	121	1152	1152;2297;493;463;760;828;283	0	93.885	29117000	14
Q15691	MAPRE1	Microtubule-associated protein RP/EB family member 1 OS=Homo sapiens OX=9606	1	8	8	8	33.6	33.6	33.6	29.999	268	268	0	58.407	17733000	9
P29966	MARCKS	Myristoylated alanine-rich C-kinase substrate OS=Homo sapiens OX=9606	1	3	3	3	9.3	9.3	9.3	31.554	332	332	0	18.757	6505700	4
P31153	MAT2A	S-adenosylmethionine synthase isoform type-2 OS=Homo sapiens OX=9606	2	8	8	8	26.3	26.3	26.3	43.66	395	395;395	0	65.339	28825000	12
Q9NZL9	MAT2B	Methionine adenosyltransferase 2 subunit beta OS=Homo sapiens OX=9606	2	3	3	3	12.3	12.3	12.3	37.551	334	334;117	0	24.72	3764000	3
H0Y8T4	MATR3	Matrin-3 (Fragment) OS=Homo sapiens OX=9606	13	2	2	2	8.4	8.4	8.4	37.675	334	334;509;794;847;847;895;81;86;109;121;124;172;433	0	15.153	2344500	2
P43121	MCAM	Cell surface glycoprotein MUC18 OS=Homo sapiens OX=9606	1	5	5	5	13.5	13.5	13.5	71.607	646	646	0	39.106	8989700	5
Q14566	MCM6	DNA replication licensing factor MCM6 OS=Homo sapiens OX=9606	1	3	3	3	2.7	2.7	2.7	92.888	821	821	0	16.642	1058100	2
P40925	MDH1	Malate dehydrogenase, cytoplasmic OS=Homo sapiens OX=9606	6	14	14	14	46.7	46.7	46.7	36.426	334	334;210;169;222;119;114	0	123.22	62653000	11
P40926	MDH2	Malate dehydrogenase, mitochondrial OS=Homo sapiens OX=9606	2	15	15	15	55.3	55.3	55.3	35.503	338	338;231	0	151.22	94231000	31
P48163	ME1	NADP-dependent malic enzyme OS=Homo sapiens OX=9606	1	4	4	4	10.1	10.1	10.1	64.149	572	572	0	29.003	3227000	4
Q14696	MESD	LRP chaperone MESD OS=Homo sapiens OX=9606	1	2	2	2	17.5	17.5	17.5	26.076	234	234	0	15.703	3946200	4
P14174	MIF	Macrophage migration inhibitory factor OS=Homo sapiens OX=9606	1	2	2	2	17.4	17.4	17.4	12.476	115	115	0	17.833	28385000	2
Q5R3B4	MPC2	Mitochondrial pyruvate carrier (Fragment) OS=Homo sapiens OX=9606	2	2	2	2	27.6	27.6	27.6	11.681	105	105;127	0	11.177	1713200	1
P26038	MSN	Moesin OS=Homo sapiens OX=9606	2	26	26	16	35.7	35.7	23.6	67.819	577	577;103	0	183.47	134640000	40
O94776	MTA2	Metastasis-associated protein MTA2 OS=Homo sapiens OX=9606	1	2	2	2	3.4	3.4	3.4	75.022	668	668	0	11.35	957060	2
Q9Y6C9	MTCH2	Mitochondrial carrier homolog 2 OS=Homo sapiens OX=9606	2	11	11	10	42.9	42.9	35	33.331	303	303;262	0	106.62	75765000	17
P00403	MT-CO2	Cytochrome c oxidase subunit 2 OS=Homo sapiens OX=9606	1	3	3	3	20.3	20.3	20.3	25.565	227	227	0	18.277	3781600	3
V9GZ78	MTHFD1	C-1-tetrahydrofolate synthase, cytoplasmic OS=Homo sapiens OX=9606	6	4	4	4	5.3	5.3	5.3	92.569	854	854;922;935;935;964;644	0	23.219	6089900	2
Q9H3R2	MUC13	Mucin-13 OS=Homo sapiens OX=9606	1	6	6	6	14.8	14.8	14.8	54.603	512	512	0	41.743	8657600	6
H3BP35	MVD	Diphosphomevalonate decarboxylase (Fragment) OS=Homo sapiens OX=9606	5	3	3	3	16.2	16.2	16.2	29.378	271	271;400;41;51;91	0	23.22	10360000	3
Q969H8	MYDGF	Myeloid-derived growth factor OS=Homo sapiens OX=9606	3	5	5	5	26	26	26	18.795	173	173;84;189	0	38.116	37898000	10
F8VR84	MYG1	MYG1 exonuclease OS=Homo sapiens OX=9606	4	4	4	4	23.5	23.5	23.5	24.058	213	213;376;301;130	0	28.519	9522400	4
P35580	MYH10	Myosin-10 OS=Homo sapiens OX=9606	6	3	3	3	1.7	1.7	1.7	229	1976	1976;1960;508;638;1972;1995	0	16.976	1006500	2
F8VPF3	MYL6	Myosin light polypeptide 6 (Fragment) OS=Homo sapiens OX=9606	14	6	6	6	59.2	59.2	59.2	14.436	130	130;145;151;152;152;161;238;103;115;196;175;208;47;83	0	52.956	19635000	3
F5H6E2	MYO1C	Unconventional myosin-Ic OS=Homo sapiens OX=9606	2	2	2	2	1.6	1.6	1.6	118.99	1039	1039;1063	0	11.305	1826500	2
Q9NZM1	MYOF	Myoferlin OS=Homo sapiens OX=9606	1	2	2	2	1.7	1.7	1.7	234.71	2061	2061	0.0022599	10.63	883940	1
A0A0B4J1W3	NAA15	N-alpha-acetyltransferase 15, NatA auxiliary subunit OS=Homo sapiens OX=9606	3	4	4	4	4.9	4.9	4.9	101.2	865	865;866;864	0	27.07	4437600	4
E7EQ69	NAA50	N-alpha-acetyltransferase 50 OS=Homo sapiens OX=9606	9	3	3	3	23.2	23.2	23.2	19.311	168	168;169;81;129;48;57;58;58;95	0	19.213	6075800	2
F8VZJ2	NACA	Nascent polypeptide-associated complex subunit alpha OS=Homo sapiens OX=9606	9	4	4	4	44.1	44.1	44.1	15.016	136	136;213;215;2078;71;148;198;126;213	0	33.929	19972000	7
Q13564	NAE1	NEDD8-activating enzyme E1 regulatory subunit OS=Homo sapiens OX=9606	3	5	5	5	9.9	9.9	9.9	60.246	534	534;129;112	0	32.644	14113000	5
P43490	NAMPT	Nicotinamide phosphoribosyltransferase OS=Homo sapiens OX=9606	2	5	5	5	17.1	17.1	17.1	55.52	491	491;368	0	30.202	11905000	5
Q9NR45	NANS	Sialic acid synthase OS=Homo sapiens OX=9606	1	2	2	2	5.6	5.6	5.6	40.307	359	359	0	13.892	1870000	1
H0YHC3	NAP1L1	Nucleosome assembly protein 1-like 1 (Fragment) OS=Homo sapiens OX=9606	16	7	5	5	34.8	29.8	29.8	23.417	198	198;207;209;264;327;349;379;383;385;391;177;328;114;215;237;161	0	41.182	23853000	10
Q99733	NAP1L4	Nucleosome assembly protein 1-like 4 OS=Homo sapiens OX=9606	13	8	8	6	23.7	23.7	21.1	42.823	375	375;107;128;133;140;178;169;278;78;154;156;101;204	0	71.719	30466000	11
Q6XQN6	NAPRT	Nicotinate phosphoribosyltransferase OS=Homo sapiens OX=9606	6	14	14	14	34	34	34	57.578	538	538;584;490;128;163;232	0	99.625	26722000	15
P49321	NASP	Nuclear autoantigenic sperm protein OS=Homo sapiens OX=9606	8	12	12	12	17.8	17.8	17.8	85.237	788	788;422;175;256;154;268;288;316	0	124.78	74676000	17
Q8NCW5	NAXE	NAD(P)H-hydrate epimerase OS=Homo sapiens OX=9606	3	9	9	9	44.8	44.8	44.8	31.674	288	288;245;260	0	75.592	24855000	9
Q6PIU2	NCEH1	Neutral cholesterol ester hydrolase 1 OS=Homo sapiens OX=9606	4	6	6	6	18.4	18.4	18.4	45.807	408	408;440;448;284	0	39.828	15869000	7
P19338	NCL	Nucleolin OS=Homo sapiens OX=9606	2	12	12	12	20	20	20	76.613	710	710;296	0	127.66	18240000	13
Q92597	NDRG1	Protein NDRG1 OS=Homo sapiens OX=9606	11	5	5	5	22.6	22.6	22.6	42.835	394	394;141;103;133;156;158;165;167;193;216;95	0	36.384	9026800	5
Q96TA1	NIBAN2	Protein Niban 2 OS=Homo sapiens OX=9606	1	11	11	11	18.2	18.2	18.2	84.137	746	746	0	110.59	25362000	15
Q9GZT8	NIF3L1	NIF3-like protein 1 OS=Homo sapiens OX=9606	6	5	5	5	17.5	17.5	17.5	41.968	377	377;209;252;162;162;84	0	34.613	11746000	7
Q9BYT8	NLN	Neurolysin, mitochondrial OS=Homo sapiens OX=9606	4	8	8	8	14.8	14.8	14.8	80.651	704	704;600;414;283	0	50.751	9420900	9
Q32Q12	NME1-NME2	Nucleoside diphosphate kinase OS=Homo sapiens OX=9606	8	16	16	7	66.1	66.1	24.7	32.642	292	292;197;152;139;82;82;137;60	0	121.93	95801000	25
E9PLK3	NPEPPS	Aminopeptidase OS=Homo sapiens OX=9606	8	21	21	21	24.9	24.9	24.9	102.99	915	915;919;478;169;65;201;127;158	0	152.13	86885000	24
P06748	NPM1	Nucleophosmin OS=Homo sapiens OX=9606	3	5	5	5	18.7	18.7	18.7	32.575	294	294;111;59	0	40.778	25655000	5
B4DLR8	NQO1	NAD(P)H dehydrogenase [quinone] 1 OS=Homo sapiens OX=9606	4	8	8	8	30.7	30.7	30.7	22.793	202	202;274;269;253	0	61.464	20578000	10
Q5TD07	NQO2	Ribosyldihydronicotinamide dehydrogenase [quinone] OS=Homo sapiens OX=9606	4	5	5	5	34.7	34.7	34.7	21.537	193	193;231;139;63	0	36.251	9362000	5
P01111	NRAS	GTPase NRas OS=Homo sapiens OX=9606	5	3	3	3	18.5	18.5	18.5	21.229	189	189;189;43;75;189	0	20.113	4229500	4
G3V1R5	NRDC	Nardilysin OS=Homo sapiens OX=9606	5	6	6	6	6	6	6	125.12	1087	1087;1151;1219;949;538	0	37.085	4182700	6
Q15738	NSDHL	Sterol-4-alpha-carboxylate 3-dehydrogenase, decarboxylating OS=Homo sapiens OX=9606	2	4	4	4	14.5	14.5	14.5	41.9	373	373;254	0	26.891	5519700	7
Q9UNZ2	NSFL1C	NSFL1 cofactor p47 OS=Homo sapiens OX=9606	2	8	8	8	25.9	25.9	25.9	40.572	370	370;274	0	54.675	7854700	4
Q08J23	NSUN2	RNA cytosine C(5)-methyltransferase NSUN2 OS=Homo sapiens OX=9606	2	13	13	13	21.8	21.8	21.8	86.47	767	767;202	0	86.34	19759000	15
Q9BV86	NTMT1	N-terminal Xaa-Pro-Lys N-methyltransferase 1 OS=Homo sapiens OX=9606	3	2	2	2	13	13	13	25.387	223	223;70;109	0	14.247	1830200	2
Q02818	NUCB1	Nucleobindin-1 OS=Homo sapiens OX=9606	3	6	6	6	15	15	15	53.879	461	461;267;295	0	39.127	5850900	7
Q9Y266	NUDC	Nuclear migration protein nudC OS=Homo sapiens OX=9606	3	6	6	6	23.3	23.3	23.3	38.242	331	331;186;133	0	42.623	17160000	6
P36639	NUDT1	7,8-dihydro-8-oxoguanine triphosphatase OS=Homo sapiens OX=9606	1	3	3	3	14.2	14.2	14.2	22.519	197	197	0	25.738	11550000	4
P50583	NUDT2	Bis(5'-nucleosyl)-tetraphosphatase [asymmetrical] OS=Homo sapiens OX=9606	1	2	2	2	15.6	15.6	15.6	16.829	147	147	0	11.325	2249100	2
Q9UKK9	NUDT5	ADP-sugar pyrophosphatase OS=Homo sapiens OX=9606	5	4	4	4	17.8	17.8	17.8	24.327	219	219;232;137;180;186	0	31.844	12655000	4
P61970	NUTF2	Nuclear transport factor 2 OS=Homo sapiens OX=9606	2	4	4	4	35.4	35.4	35.4	14.478	127	127;107	0	27.634	38773000	4
O60502	OGA	Protein O-GlcNAcase OS=Homo sapiens OX=9606	2	2	2	2	1.6	1.6	1.6	102.91	916	916;256	0.0022624	10.663	1381700	2
C9JTK6	OLA1	Obg-like ATPase 1 (Fragment) OS=Homo sapiens OX=9606	3	2	2	2	22.4	22.4	22.4	12.302	116	116;396;416	0	13.891	3605600	2
Q9NPF4	OSGEP	Probable tRNA N6-adenosine threonylcarbamoyltransferase OS=Homo sapiens OX=9606	1	2	2	2	8.1	8.1	8.1	36.426	335	335	0	13.062	3316400	3
F5GYN4	OTUB1	Ubiquitinyl hydrolase 1 OS=Homo sapiens OX=9606	6	4	4	4	22	22	22	28.05	241	241;271;272;280;170;286	0	24.304	4719600	4
Q32P28	P3H1	Prolyl 3-hydroxylase 1 OS=Homo sapiens OX=9606	3	5	5	5	7.5	7.5	7.5	83.393	736	736;207;222	0	34.828	5979600	5
P13674	P4HA1	Prolyl 4-hydroxylase subunit alpha-1 OS=Homo sapiens OX=9606	1	11	11	11	25.3	25.3	25.3	61.049	534	534	0	88.843	25070000	13
O15460	P4HA2	Prolyl 4-hydroxylase subunit alpha-2 OS=Homo sapiens OX=9606	9	4	4	4	10.7	10.7	10.7	60.901	535	535;101;114;146;153;167;184;204;236	0	31.379	7858400	6
P07237	P4HB	Protein disulfide-isomerase OS=Homo sapiens OX=9606	12	38	38	38	65.6	65.6	65.6	57.116	508	508;464;274;200;208;148;188;156;166;117;106;54	0	323.31	558920000	62
Q9UQ80	PA2G4	Proliferation-associated protein 2G4 OS=Homo sapiens OX=9606	5	13	13	13	32.2	32.2	32.2	43.786	394	394;284;187;160;64	0	87.757	34908000	12
A0A087WTT1	PABPC1	Polyadenylate-binding protein OS=Homo sapiens OX=9606	18	13	13	9	29.1	29.1	18.6	58.535	522	522;591;636;604;284;174;631;131;108;165;118;129;550;75;197;249;382;614	0	106.32	38552000	16
B1ANR0	PABPC4	Polyadenylate-binding protein OS=Homo sapiens OX=9606	5	6	2	2	12.2	3.3	3.3	67.97	615	615;644;129;112;200	0	11.012	1574600	2
E9PJ75	PACSIN3	Protein kinase C and casein kinase substrate in neurons protein 3 (Fragment) OS=Homo sapiens OX=9606	6	4	4	4	31	31	31	16.175	142	142;148;320;405;424;69	0	26.165	6105500	5
P68402	PAFAH1B2	Platelet-activating factor acetylhydrolase IB subunit beta OS=Homo sapiens OX=9606	2	2	2	2	9.2	9.2	9.2	25.569	229	229;175	0	12.625	375800	1
E9PBS1	PAICS	AIR carboxylase (Fragment) OS=Homo sapiens OX=9606	3	6	6	6	18.9	18.9	18.9	45.651	413	413;425;333	0	41.342	8468500	5
Q13177	PAK2	Serine/threonine-protein kinase PAK 2 OS=Homo sapiens OX=9606	5	9	9	9	28.1	28.1	28.1	58.042	524	524;181;543;559;221	0	70.963	9589800	11
K7ELW0	PARK7	Parkinson disease protein 7 OS=Homo sapiens OX=9606	3	10	10	10	70.4	70.4	70.4	17.91	169	169;189;160	0	85.072	42804000	15
P09874	PARP1	Poly [ADP-ribose] polymerase 1 OS=Homo sapiens OX=9606	3	3	3	3	3.4	3.4	3.4	113.08	1014	1014;108;155	0	19.777	1906800	2
P61457	PCBD1	Pterin-4-alpha-carbinolamine dehydratase OS=Homo sapiens OX=9606	1	2	2	2	16.3	16.3	16.3	11.999	104	104	0	11.842	2135300	2
Q15365	PCBP1	Poly(rC)-binding protein 1 OS=Homo sapiens OX=9606	3	6	6	4	22.2	22.2	15.2	37.497	356	356;64;36	0	42.781	10537000	5
Q15366	PCBP2	Poly(rC)-binding protein 2 OS=Homo sapiens OX=9606	11	5	3	3	20.5	13.7	13.7	38.58	365	365;158;202;321;160;301;322;361;371;112;184	0	19.818	7260100	3
P12004	PCNA	Proliferating cell nuclear antigen OS=Homo sapiens OX=9606	1	14	14	14	42.9	42.9	42.9	28.768	261	261	0	117.8	89982000	20
Q9UHG3	PCYOX1	Prenylcysteine oxidase 1 OS=Homo sapiens OX=9606	5	4	4	4	8.9	8.9	8.9	56.639	505	505;293;154;209;129	0	26.44	9751300	6
H7C5M9	PDCD10	Programmed cell death protein 10 (Fragment) OS=Homo sapiens OX=9606	9	2	2	2	16.4	16.4	16.4	14.117	122	122;134;146;186;202;212;59;79;149	0	12.62	7649400	2
Q8WUM4	PDCD6IP	Programmed cell death 6-interacting protein OS=Homo sapiens OX=9606	1	4	4	4	5.5	5.5	5.5	96.022	868	868	0	28.163	2865800	4
P30101	PDIA3	Protein disulfide-isomerase A3 OS=Homo sapiens OX=9606	1	35	35	30	65.1	65.1	56	56.782	505	505	0	323.31	585550000	51
P13667	PDIA4	Protein disulfide-isomerase A4 OS=Homo sapiens OX=9606	2	32	32	32	48.8	48.8	48.8	72.932	645	645;646	0	271.34	259330000	56
Q14554	PDIA5	Protein disulfide-isomerase A5 OS=Homo sapiens OX=9606	1	2	2	2	3.1	3.1	3.1	59.594	519	519	0.0011442	10.799	30141000	1
Q15084	PDIA6	Protein disulfide-isomerase A6 OS=Homo sapiens OX=9606	1	21	21	21	48.2	48.2	48.2	48.121	440	440	0	205.57	196260000	29
O00764	PDXK	Pyridoxal kinase OS=Homo sapiens OX=9606	3	6	6	6	27.9	27.9	27.9	35.102	312	312;272;87	0	49.246	9011100	8
P30086	PEBP1	Phosphatidylethanolamine-binding protein 1 OS=Homo sapiens OX=9606	1	9	9	9	82.4	82.4	82.4	21.057	187	187	0	88.728	32352000	11
O15067	PFAS	Phosphoribosylformylglycinamidine synthase OS=Homo sapiens OX=9606	7	30	30	30	33.9	33.9	33.9	144.73	1338	1338;385;131;135;62;116;103	0	230.76	114720000	39
Q9UHV9	PFDN2	Prefoldin subunit 2 OS=Homo sapiens OX=9606	1	2	2	2	16.9	16.9	16.9	16.648	154	154	0	15.116	3203800	2
H3BPF6	PFDN5	Prefoldin subunit 5 (Fragment) OS=Homo sapiens OX=9606	3	3	3	3	21.7	21.7	21.7	17.047	152	152;154;84	0	18.625	4921100	3
P08237	PFKM	ATP-dependent 6-phosphofructokinase, muscle type OS=Homo sapiens OX=9606	3	4	3	2	6.3	5.1	4	85.182	780	780;883;694	0	17.093	1230300	1
Q01813	PFKP	ATP-dependent 6-phosphofructokinase, platelet type OS=Homo sapiens OX=9606	6	6	6	4	8.9	8.9	5.4	85.595	784	784;568;103;118;166;210	0	35.139	3275000	7
P07737	PFN1	Profilin-1 OS=Homo sapiens OX=9606	4	14	14	14	75.7	75.7	75.7	15.054	140	140;104;140;165	0	111.8	202070000	21
C9J712	PFN2	Profilin OS=Homo sapiens OX=9606	5	3	3	3	26.4	26.4	26.4	9.7982	91	91;140;91;110;188	0	28.744	3873500	3
P18669	PGAM1	Phosphoglycerate mutase 1 OS=Homo sapiens OX=9606	3	17	17	17	70.9	70.9	70.9	28.804	254	254;254;253	0	203.26	183700000	26
P52209	PGD	6-phosphogluconate dehydrogenase, decarboxylating OS=Homo sapiens OX=9606	5	3	3	3	8.1	8.1	8.1	53.139	483	483;160;205;256;224	0	20.344	4533500	3
P00558	PGK1	Phosphoglycerate kinase 1 OS=Homo sapiens OX=9606	2	30	30	30	80.6	80.6	80.6	44.614	417	417;417	0	323.31	228390000	55
O95336	PGLS	6-phosphogluconolactonase OS=Homo sapiens OX=9606	4	8	8	8	51.2	51.2	51.2	27.547	258	258;216;179;147	0	57.062	28498000	15
P36871	PGM1	Phosphoglucomutase-1 OS=Homo sapiens OX=9606	2	16	16	16	35.2	35.2	35.2	61.448	562	562;584	0	117.25	37381000	18
Q96G03	PGM2	Phosphoglucomutase-2 OS=Homo sapiens OX=9606	4	5	5	5	11.1	11.1	11.1	68.283	612	612;86;195;59	0	38.972	14659000	7
A6NDG6	PGP	Glycerol-3-phosphate phosphatase OS=Homo sapiens OX=9606	2	5	5	5	22.4	22.4	22.4	34.006	321	321;57	0	35.616	14836000	7
O00264	PGRMC1	Membrane-associated progesterone receptor component 1 OS=Homo sapiens OX=9606	1	5	5	5	20.5	20.5	20.5	21.671	195	195	0	35.602	11581000	8
O15173	PGRMC2	Membrane-associated progesterone receptor component 2 OS=Homo sapiens OX=9606	1	5	5	5	22.4	22.4	22.4	23.818	223	223	0	33.364	6020700	4
A0A286YF22	PHGDH	D-3-phosphoglycerate dehydrogenase OS=Homo sapiens OX=9606	14	8	8	8	20.7	20.7	20.7	55.938	526	526;533;445;532;429;239;97;123;165;63;72;145;276;89	0	61.573	18948000	9
O00625	PIR	Pirin OS=Homo sapiens OX=9606	1	2	2	2	7.2	7.2	7.2	32.113	290	290	0	12.026	3690600	2
I3L4H1	PITPNA	Phosphatidylinositol transfer protein alpha isoform (Fragment) OS=Homo sapiens OX=9606	10	6	6	5	22.5	22.5	18.7	24.64	209	209;270;270;115;142;83;98;121;44;66	0	36.897	8766000	6
A0A0A0MSW4	PITPNB	Phosphatidylinositol transfer protein beta isoform OS=Homo sapiens OX=9606	4	4	3	3	20.3	17.3	17.3	31.581	271	271;271;120;167	0	20.23	5003100	3
P14618	PKM	Pyruvate kinase PKM OS=Homo sapiens OX=9606	12	23	23	23	61.2	61.2	61.2	57.936	531	531;457;485;281;366;151;162;168;82;51;69;574	0	213.14	179360000	43
O60664	PLIN3	Perilipin-3 OS=Homo sapiens OX=9606	4	13	13	13	43.5	43.5	43.5	47.074	434	434;172;292;168	0	124.92	45443000	19
Q02809	PLOD1	Procollagen-lysine,2-oxoglutarate 5-dioxygenase 1 OS=Homo sapiens OX=9606	2	3	3	3	4.5	4.5	4.5	83.549	727	727;283	0	20.572	3837600	4
E7ETU9	PLOD2	Procollagen-lysine 5-dioxygenase OS=Homo sapiens OX=9606	3	3	3	3	6.3	6.3	6.3	81.169	703	703;737;229	0	21.291	297290000	6
O60568	PLOD3	Multifunctional procollagen lysine hydroxylase and glycosyltransferase LH3 OS=Homo sapiens OX=9606	6	8	8	8	13	13	13	84.784	738	738;270;264;66;125;171	0	49.162	11451000	9
P13797	PLS3	Plastin-3 OS=Homo sapiens OX=9606	8	17	17	17	30	30	30	70.81	630	630;617;190;164;627;629;266;246	0	135.19	111380000	27
Q15126	PMVK	Phosphomevalonate kinase OS=Homo sapiens OX=9606	2	2	2	2	11.5	11.5	11.5	21.995	192	192;652	0.0022753	10.705	2268000	2
P00491	PNP	Purine nucleoside phosphorylase OS=Homo sapiens OX=9606	5	10	10	10	52.2	52.2	52.2	32.118	289	289;221;93;61;585	0	94.326	40375000	14
J3QQV6	PNPO	Pyridoxal 5'-phosphate synthase (Fragment) OS=Homo sapiens OX=9606	4	3	3	3	29.7	29.7	29.7	19.085	165	165;238;261;151	0	19.208	3063200	2
O00592	PODXL	Podocalyxin OS=Homo sapiens OX=9606	1	3	3	3	5.2	5.2	5.2	58.635	558	558	0	18.74	20435000	4
Q9H488	POFUT1	GDP-fucose protein O-fucosyltransferase 1 OS=Homo sapiens OX=9606	1	12	12	12	43.6	43.6	43.6	43.955	388	388	0	89.51	25874000	17
A0A0J9YXF2	PON2	Paraoxonase 2, isoform CRA_a OS=Homo sapiens OX=9606	7	4	4	4	13.6	13.6	13.6	41.527	375	375;342;354;354;50;84;219	0	30.727	12039000	7
E7EMD0	POR	NADPH--cytochrome P450 reductase OS=Homo sapiens OX=9606	3	5	5	5	17	17	17	47.401	418	418;677;725	0	38.882	5028100	7
Q6S8J3	POTEE	POTE ankyrin domain family member E OS=Homo sapiens OX=9606	5	15	2	2	14.4	4.6	4.6	121.36	1075	1075;1075;1075;1038;375	0	11.265	6539700	4
Q15181	PPA1	Inorganic pyrophosphatase OS=Homo sapiens OX=9606	2	17	17	17	54.3	54.3	54.3	32.66	289	289;178	0	165.43	101510000	22
Q06203	PPAT	Amidophosphoribosyltransferase OS=Homo sapiens OX=9606	3	7	7	7	17	17	17	57.398	517	517;192;72	0	53.562	9091100	4
P62937	PPIA	Peptidyl-prolyl cis-trans isomerase A OS=Homo sapiens OX=9606	12	14	13	13	82.4	82.4	82.4	18.012	165	165;120;121;58;164;164;164;164;164;164;164;164	0	100.7	315410000	24
P23284	PPIB	Peptidyl-prolyl cis-trans isomerase B OS=Homo sapiens OX=9606	4	22	22	21	70.4	70.4	70.4	23.742	216	216;96;144;177	0	204.14	333950000	52
P45877	PPIC	Peptidyl-prolyl cis-trans isomerase C OS=Homo sapiens OX=9606	1	3	2	2	9.4	6.6	6.6	22.763	212	212	0.0022779	10.724	543280	2
Q08752	PPID	Peptidyl-prolyl cis-trans isomerase D OS=Homo sapiens OX=9606	1	2	2	2	6.8	6.8	6.8	40.763	370	370	0	11.982	1020200	2
O15355	PPM1G	Protein phosphatase 1G OS=Homo sapiens OX=9606	1	4	4	4	10.4	10.4	10.4	59.271	546	546	0	24.703	4263000	4
Q9Y570	PPME1	Protein phosphatase methylesterase 1 OS=Homo sapiens OX=9606	1	3	3	3	14.2	14.2	14.2	42.315	386	386	0	22.134	3433400	3
P67775	PPP2CA	Serine/threonine-protein phosphatase 2A catalytic subunit alpha isoform OS=Homo sapiens OX=9606	4	3	3	3	12.9	12.9	12.9	35.594	309	309;309;124;52	0	27.98	6647200	5
P30153	PPP2R1A	Serine/threonine-protein phosphatase 2A 65 kDa regulatory subunit A alpha isoform OS=Homo sapiens OX=9606	7	17	17	12	37	37	26.3	65.308	589	589;410;395;132;83;119;135	0	133.61	61859000	21
P63151	PPP2R2A	Serine/threonine-protein phosphatase 2A 55 kDa regulatory subunit B alpha isoform OS=Homo sapiens OX=9606	7	7	7	7	19.2	19.2	19.2	51.691	447	447;197;453;105;132;443;447	0	64.844	12295000	8
A8MU39	PPP5C	Serine/threonine-protein phosphatase OS=Homo sapiens OX=9606	3	2	2	2	7.3	7.3	7.3	42.394	371	371;485;499	0	10.936	2692400	2
O00743	PPP6C	Serine/threonine-protein phosphatase 6 catalytic subunit OS=Homo sapiens OX=9606	1	3	3	3	11.5	11.5	11.5	35.144	305	305	0	18.735	2663700	5
H7BXH2	PPP6R3	Serine/threonine-protein phosphatase 6 regulatory subunit 3 OS=Homo sapiens OX=9606	7	2	2	2	2.3	2.3	2.3	92.407	827	827;838;873;75;186;580;641	0.0022676	10.699	683870	0
Q06830	PRDX1	Peroxiredoxin-1 OS=Homo sapiens OX=9606	3	21	21	19	73.4	73.4	61.8	22.11	199	199;171;97	0	173.53	215140000	39
P32119	PRDX2	Peroxiredoxin-2 OS=Homo sapiens OX=9606	2	8	7	7	49.5	43.9	43.9	21.892	198	198;136	0	47.387	9624600	10
Q13162	PRDX4	Peroxiredoxin-4 OS=Homo sapiens OX=9606	4	8	7	7	38.7	34.3	34.3	30.54	271	271;161;186;185	0	60.297	27330000	13
P30044	PRDX5	Peroxiredoxin-5, mitochondrial OS=Homo sapiens OX=9606	1	7	7	7	37.9	37.9	37.9	22.086	214	214	0	71.262	15516000	9
P30041	PRDX6	Peroxiredoxin-6 OS=Homo sapiens OX=9606	1	22	22	22	78.1	78.1	78.1	25.035	224	224	0	193.37	259150000	39
P14314	PRKCSH	Glucosidase 2 subunit beta OS=Homo sapiens OX=9606	6	16	16	16	26.5	26.5	26.5	59.425	528	528;535;168;200;140;144	0	119.34	76810000	19
E9PKG1	PRMT1	Protein arginine N-methyltransferase 1 OS=Homo sapiens OX=9606	6	2	2	2	8.6	8.6	8.6	37.709	325	325;371;160;205;207;238	0	14.389	3134400	3
Q96M27	PRRC1	Protein PRRC1 OS=Homo sapiens OX=9606	1	2	2	2	6.3	6.3	6.3	46.701	445	445	0	15.302	3497500	3
I3L0U2	PRSS21	Testisin (Fragment) OS=Homo sapiens OX=9606	3	2	2	2	10.1	10.1	10.1	24.706	218	218;256;314	0	12.465	2252700	2
Q9Y617	PSAT1	Phosphoserine aminotransferase OS=Homo sapiens OX=9606	1	18	18	18	45.4	45.4	45.4	40.422	370	370	0	146.9	110440000	23
P25786	PSMA1	Proteasome subunit alpha type-1 OS=Homo sapiens OX=9606	3	12	12	12	46.4	46.4	46.4	29.555	263	263;238;164	0	102.6	46698000	21
A0A024RA52	PSMA2	Proteasome subunit alpha type OS=Homo sapiens OX=9606	3	6	6	6	26.5	26.5	26.5	25.898	234	234;234;164	0	51.499	35664000	10
P25788	PSMA3	Proteasome subunit alpha type-3 OS=Homo sapiens OX=9606	5	7	7	7	32.2	32.2	32.2	28.433	255	255;180;36;54;83	0	52.23	48564000	10
H0YMZ1	PSMA4	Proteasome subunit alpha type (Fragment) OS=Homo sapiens OX=9606	11	6	6	6	33.2	33.2	33.2	24.526	220	220;236;261;230;183;209;174;181;122;125;86	0	47.873	29891000	6
P28066	PSMA5	Proteasome subunit alpha type-5 OS=Homo sapiens OX=9606	1	8	8	8	35.7	35.7	35.7	26.411	241	241	0	65.73	35451000	9
P60900	PSMA6	Proteasome subunit alpha type-6 OS=Homo sapiens OX=9606	8	11	11	11	48	48	48	27.399	246	246;252;203;148;107;41;67;85	0	84.598	79364000	18
O14818	PSMA7	Proteasome subunit alpha type-7 OS=Homo sapiens OX=9606	5	9	9	9	42.7	42.7	42.7	27.887	248	248;187;256;224;63	0	65.376	67236000	20
P20618	PSMB1	Proteasome subunit beta type-1 OS=Homo sapiens OX=9606	1	11	11	11	56.8	56.8	56.8	26.489	241	241	0	103.54	32584000	17
P49721	PSMB2	Proteasome subunit beta type-2 OS=Homo sapiens OX=9606	2	10	10	10	47.3	47.3	47.3	22.836	201	201;84	0	75.689	14817000	6
A0A087WUL2	PSMB3	Proteasome chain 13 (Fragment) OS=Homo sapiens OX=9606	4	9	9	9	62.8	62.8	62.8	16.161	145	145;205;107;112	0	68.684	23165000	10
P28070	PSMB4	Proteasome subunit beta type-4 OS=Homo sapiens OX=9606	1	7	7	7	26.9	26.9	26.9	29.204	264	264	0	55.537	31889000	7
P28074	PSMB5	Proteasome subunit beta type-5 OS=Homo sapiens OX=9606	2	12	12	12	40.7	40.7	40.7	28.48	263	263;118	0	110.96	72406000	13
P28072	PSMB6	Proteasome subunit beta type-6 OS=Homo sapiens OX=9606	3	3	3	3	13.4	13.4	13.4	25.357	239	239;102;213	0	28.614	40271000	5
Q99436	PSMB7	Proteasome subunit beta type-7 OS=Homo sapiens OX=9606	2	5	5	5	14.4	14.4	14.4	29.965	277	277;210	0	32.857	20142000	8
P62191	PSMC1	26S proteasome regulatory subunit 4 OS=Homo sapiens OX=9606	1	6	6	6	11.8	11.8	11.8	49.184	440	440	0	38.551	24630000	6
P35998	PSMC2	26S proteasome regulatory subunit 7 OS=Homo sapiens OX=9606	2	11	11	11	29.6	29.6	29.6	48.633	433	433;130	0	87.425	22549000	12
E9PM69	PSMC3	26S proteasome regulatory subunit 6A OS=Homo sapiens OX=9606	7	6	6	6	20.9	20.9	20.9	44.323	397	397;423;439;311;257;301;184	0	42.821	8216000	7
P43686	PSMC4	26S proteasome regulatory subunit 6B OS=Homo sapiens OX=9606	1	7	7	7	25.1	25.1	25.1	47.366	418	418	0	41.808	10144000	5
P62195	PSMC5	26S proteasome regulatory subunit 8 OS=Homo sapiens OX=9606	8	8	8	8	27.3	27.3	27.3	45.626	406	406;169;263;215;241;257;143;52	0	59.356	9501800	7
P62333	PSMC6	26S proteasome regulatory subunit 10B OS=Homo sapiens OX=9606	7	8	8	8	26.7	26.7	26.7	44.172	389	389;403;262;194;67;70;97	0	53.099	18874000	9
H7C378	PSMD1	26S proteasome non-ATPase regulatory subunit 1 (Fragment) OS=Homo sapiens OX=9606	3	3	3	3	28.6	28.6	28.6	20.317	192	192;953;953	0	19.604	5846300	2
O00231	PSMD11	26S proteasome non-ATPase regulatory subunit 11 OS=Homo sapiens OX=9606	2	8	8	8	24.9	24.9	24.9	47.463	422	422;187	0	51.65	15943000	9
O00232	PSMD12	26S proteasome non-ATPase regulatory subunit 12 OS=Homo sapiens OX=9606	1	5	5	5	12.9	12.9	12.9	52.904	456	456	0	35.433	5715200	5
J3KNQ3	PSMD13	26S proteasome non-ATPase regulatory subunit 13 OS=Homo sapiens OX=9606	7	7	7	7	18.6	18.6	18.6	39.829	349	349;376;377;221;263;70;113	0	45.271	8877900	8
Q13200	PSMD2	26S proteasome non-ATPase regulatory subunit 2 OS=Homo sapiens OX=9606	4	10	10	10	14.1	14.1	14.1	100.2	908	908;217;143;203	0	84.095	22269000	17
O43242	PSMD3	26S proteasome non-ATPase regulatory subunit 3 OS=Homo sapiens OX=9606	2	6	6	6	15.7	15.7	15.7	60.977	534	534;117	0	42.493	6511300	6
P55036	PSMD4	26S proteasome non-ATPase regulatory subunit 4 OS=Homo sapiens OX=9606	5	2	2	2	7.2	7.2	7.2	40.736	377	377;380;84;193;203	0	14.648	3606600	2
Q16401	PSMD5	26S proteasome non-ATPase regulatory subunit 5 OS=Homo sapiens OX=9606	2	3	3	3	7.3	7.3	7.3	56.195	504	504;72	0	21.365	2421000	3
Q15008	PSMD6	26S proteasome non-ATPase regulatory subunit 6 OS=Homo sapiens OX=9606	3	6	6	6	16.7	16.7	16.7	45.531	389	389;144;226	0	39.986	6038600	7
P51665	PSMD7	26S proteasome non-ATPase regulatory subunit 7 OS=Homo sapiens OX=9606	3	4	4	4	18.5	18.5	18.5	37.025	324	324;177;198	0	32.266	8692200	2
K7EJC1	PSMD8	26S proteasome non-ATPase regulatory subunit 8 OS=Homo sapiens OX=9606	4	3	3	3	18.6	18.6	18.6	19.781	172	172;250;287;350	0	24.108	3416900	3
Q06323	PSME1	Proteasome activator complex subunit 1 OS=Homo sapiens OX=9606	3	3	3	3	11.6	11.6	11.6	28.723	249	249;90;114	0	16.681	1688900	3
H0YM70	PSME2	Proteasome activator complex subunit 2 OS=Homo sapiens OX=9606	3	3	3	3	18.9	18.9	18.9	26.011	228	228;239;254	0	27.149	2642100	2
K7ESG5	PSME3	Proteasome activator complex subunit 3 OS=Homo sapiens OX=9606	11	5	5	5	28.3	28.3	28.3	23.259	198	198;231;254;179;170;193;96;110;118;130;42	0	35.879	5119700	4
C9JBI3	PSPH	O-phosphoserine phosphohydrolase (Fragment) OS=Homo sapiens OX=9606	5	7	7	7	39.6	39.6	39.6	20.745	187	187;225;10;46;90	0	46.699	20874000	9
A6NLN1	PTBP1	Polypyrimidine tract-binding protein 1 OS=Homo sapiens OX=9606	10	3	3	3	6.8	6.8	6.8	56.51	527	527;531;588;149;237;105;182;227;256;552	0	23.865	5680500	3
Q9H7Z7	PTGES2	Prostaglandin E synthase 2 OS=Homo sapiens OX=9606	3	9	9	9	36.9	36.9	36.9	41.943	377	377;186;265	0	70.573	20559000	9
Q15185	PTGES3	Prostaglandin E synthase 3 OS=Homo sapiens OX=9606	2	5	5	5	25	25	25	18.697	160	160;164	0	47.767	27471000	7
Q9P2B2	PTGFRN	Prostaglandin F2 receptor negative regulator OS=Homo sapiens OX=9606	1	2	2	2	3.9	3.9	3.9	98.555	879	879	0	11.911	1317300	2
F2Z3J9	PTGR1	15-oxoprostaglandin 13-reductase OS=Homo sapiens OX=9606	4	7	7	7	26.7	26.7	26.7	32.729	300	300;329;73;119	0	56.83	10188000	7
A0A087X296	PTGS1	Cyclooxygenase-1 OS=Homo sapiens OX=9606	4	3	3	3	9.4	9.4	9.4	63.286	551	551;599;402;171	0	27.567	6847300	2
A6PVN6	PTPA	Serine/threonine-protein phosphatase 2A activator (Fragment) OS=Homo sapiens OX=9606	11	2	2	2	13.6	13.6	13.6	19.319	176	176;250;253;329;358;64;104;129;132;263;288	0	13.501	2013100	2
E7EUH7	PUS7	Pseudouridylate synthase 7 homolog OS=Homo sapiens OX=9606	3	3	3	3	7.6	7.6	7.6	50.552	448	448;661;132	0	17.032	3317100	3
Q15274	QPRT	Nicotinate-nucleotide pyrophosphorylase [carboxylating] OS=Homo sapiens OX=9606	2	4	4	4	14.5	14.5	14.5	30.845	297	297;164	0	27.713	32066000	5
Q6ZRP7	QSOX2	Sulfhydryl oxidase 2 OS=Homo sapiens OX=9606	2	4	4	4	6.2	6.2	6.2	77.528	698	698;284	0	22.796	1385100	3
P61026	RAB10	Ras-related protein Rab-10 OS=Homo sapiens OX=9606	10	6	5	4	29	23.5	20.5	22.541	200	200;44;47;48;92;188;207;212;237;246	0	36.763	171900000	6
H3BMH2	RAB11A	Ras-related protein Rab-11A (Fragment) OS=Homo sapiens OX=9606	5	6	6	6	37.4	37.4	37.4	17.668	155	155;198;216;218;146	0	41.242	43441000	7
P61106	RAB14	Ras-related protein Rab-14 OS=Homo sapiens OX=9606	2	9	9	9	47.4	47.4	47.4	23.897	215	215;181	0	84.664	26975000	11
A0A087X163	RAB18	Ras-related protein Rab-18 OS=Homo sapiens OX=9606	4	5	5	4	34.6	34.6	31.3	20.42	182	182;206;161;291	0	35.568	7832000	5
P62820	RAB1A	Ras-related protein Rab-1A OS=Homo sapiens OX=9606	2	8	2	2	39	6.3	6.3	22.677	205	205;173	0	15.116	3083600	2
Q9H0U4	RAB1B	Ras-related protein Rab-1B OS=Homo sapiens OX=9606	3	9	9	3	55.2	55.2	21.9	22.171	201	201;169;201	0	73.885	68567000	14
Q9UL25	RAB21	Ras-related protein Rab-21 OS=Homo sapiens OX=9606	1	2	2	2	12	12	12	24.347	225	225	0	15.442	1795800	2
P61019	RAB2A	Ras-related protein Rab-2A OS=Homo sapiens OX=9606	10	10	10	10	46.2	46.2	46.2	23.545	212	212;181;208;216;135;62;104;10;69;121	0	103.81	28360000	13
F5H157	RAB35	Ras-related protein Rab-35 (Fragment) OS=Homo sapiens OX=9606	5	3	2	2	14.6	11.4	11.4	21.214	185	185;201;147;495;916	0	10.95	1143600	1
P51148	RAB5C	Ras-related protein Rab-5C OS=Homo sapiens OX=9606	10	3	3	3	16.7	16.7	16.7	23.482	216	216;150;161;282;27;100;115;124;215;215	0	20.942	9006800	3
P20340	RAB6A	Ras-related protein Rab-6A OS=Homo sapiens OX=9606	6	5	5	2	30.3	30.3	11.5	23.593	208	208;83;124;49;71;87	0	41.433	36942000	9
P51149	RAB7A	Ras-related protein Rab-7a OS=Homo sapiens OX=9606	7	10	10	10	66.2	66.2	66.2	23.489	207	207;150;160;116;134;98;91	0	84.957	62264000	13
P63000	RAC1	Ras-related C3 botulinum toxin substrate 1 OS=Homo sapiens OX=9606	8	9	9	8	45.3	45.3	39.6	21.45	192	192;192;192;130;136;148;166;185	0	59.992	34950000	12
J3KPE3	RACK1	Receptor of-activated protein C kinase 1 OS=Homo sapiens OX=9606	19	8	8	8	32.6	32.6	32.6	30.104	273	273;317;198;274;247;233;269;101;194;236;300;321;83;138;160;197;147;153;86	0	72.164	23966000	13
Q5W0S5	RAD23B	UV excision repair protein RAD23 homolog B (Fragment) OS=Homo sapiens OX=9606	3	4	4	4	33.6	33.6	33.6	15.213	146	146;409;80	0	30.139	6714900	5
P11233	RALA	Ras-related protein Ral-A OS=Homo sapiens OX=9606	2	5	5	2	21.8	21.8	15	23.567	206	206;164	0	38.48	14144000	8
P11234	RALB	Ras-related protein Ral-B OS=Homo sapiens OX=9606	3	5	2	2	22.3	15.5	15.5	23.408	206	206;167;171	0	19.641	4802600	3
P62826	RAN	GTP-binding nuclear protein Ran OS=Homo sapiens OX=9606	6	17	17	17	56.5	56.5	56.5	24.423	216	216;233;234;198;103;128	0	141.63	131440000	21
C9JJ34	RANBP1	Ran-specific GTPase-activating protein (Fragment) OS=Homo sapiens OX=9606	7	4	4	4	41.7	41.7	41.7	18.762	163	163;201;278;145;204;165;53	0	37.683	18220000	6
K7EIJ4	RANBP3	Ran-binding protein 3 (Fragment) OS=Homo sapiens OX=9606	3	2	2	2	17.4	17.4	17.4	16.965	155	155;494;567	0	12.254	1531200	2
P61224	RAP1B	Ras-related protein Rap-1b OS=Homo sapiens OX=9606	21	5	5	5	26.6	26.6	26.6	20.825	184	184;184;103;118;121;157;179;184;48;53;84;87;93;98;101;122;127;129;136;139;32	0	40.416	34663000	6
P61225	RAP2B	Ras-related protein Rap-2b OS=Homo sapiens OX=9606	4	2	2	2	14.8	14.8	14.8	20.504	183	183;108;183;183	0	12.197	2663900	2
P54136	RARS1	Arginine--tRNA ligase, cytoplasmic OS=Homo sapiens OX=9606	3	9	9	9	19.1	19.1	19.1	75.378	660	660;129;113	0	61.523	13502000	11
Q09028	RBBP4	Histone-binding protein RBBP4 OS=Homo sapiens OX=9606	10	6	2	2	15.8	10.1	10.1	47.655	425	425;175;180;207;262;167;62;85;87;104	0	12.396	3209500	4
E9PC52	RBBP7	Histone-binding protein RBBP7 OS=Homo sapiens OX=9606	4	7	7	3	21.6	21.6	15.9	46.938	416	416;425;285;67	0	51.511	8917400	7
H3BR27	RBMX	RNA-binding motif protein, X chromosome OS=Homo sapiens OX=9606	7	2	2	2	39.7	39.7	39.7	8.6098	78	78;158;292;296;390;391;37	0	13.555	1363900	2
Q9P258	RCC2	Protein RCC2 OS=Homo sapiens OX=9606	1	3	3	3	7.9	7.9	7.9	56.084	522	522	0	19.662	2228000	3
Q15293	RCN1	Reticulocalbin-1 OS=Homo sapiens OX=9606	1	4	4	4	16.9	16.9	16.9	38.89	331	331	0	40.958	19621000	6
Q14257	RCN2	Reticulocalbin-2 OS=Homo sapiens OX=9606	3	2	2	2	10.1	10.1	10.1	36.876	317	317;155;216	0	13.42	2487300	2
P35241	RDX	Radixin OS=Homo sapiens OX=9606	7	15	5	5	22.6	10.6	10.6	68.563	583	583;590;534;116;148;115;152	0	32.963	7569100	6
Q00765	REEP5	Receptor expression-enhancing protein 5 OS=Homo sapiens OX=9606	5	3	3	3	14.8	14.8	14.8	21.493	189	189;99;122;145;165	0	18.526	3621300	3
H0YGR4	REXO2	Oligoribonuclease, mitochondrial (Fragment) OS=Homo sapiens OX=9606	9	7	7	7	38.5	38.5	38.5	22.006	192	192;237;188;222;67;79;85;90;121	0	48.364	20383000	7
P61586	RHOA	Transforming protein RhoA OS=Homo sapiens OX=9606	11	7	7	2	29.5	29.5	15	21.768	193	193;127;129;187;199;66;90;91;129;248;271	0	48.759	25766000	13
Q5JR08	RHOC	Rho-related GTP-binding protein RhoC (Fragment) OS=Homo sapiens OX=9606	3	7	2	2	27.7	12.8	12.8	21.523	188	188;193;169	0	12.133	6545500	2
P84095	RHOG	Rho-related GTP-binding protein RhoG OS=Homo sapiens OX=9606	8	3	2	2	17.8	12	12	21.308	191	191;41;50;86;153;178;205;214	0	11.845	4550800	2
P13489	RNH1	Ribonuclease inhibitor OS=Homo sapiens OX=9606	5	2	2	2	6.3	6.3	6.3	49.973	461	461;189;194;199;285	0	18.156	2691900	2
A6NKB8	RNPEP	Aminopeptidase B OS=Homo sapiens OX=9606	5	6	6	6	15.7	15.7	15.7	68.168	611	611;650;171;151;344	0	46.96	8886400	7
P10155	RO60	60 kDa SS-A/Ro ribonucleoprotein OS=Homo sapiens OX=9606	2	4	4	4	11	11	11	60.67	538	538;193	0	32.621	11824000	5
P27635	RPL10	60S ribosomal protein L10 OS=Homo sapiens OX=9606	10	9	9	9	34.1	34.1	34.1	24.604	214	214;163;178;200;91;131;214;108;181;28	0	64.403	44634000	16
P62906	RPL10A	60S ribosomal protein L10a OS=Homo sapiens OX=9606	1	8	8	8	36.4	36.4	36.4	24.831	217	217	0	58.402	28047000	13
P62913	RPL11	60S ribosomal protein L11 OS=Homo sapiens OX=9606	2	6	6	6	34.3	34.3	34.3	20.252	178	178;167	0	38.437	6221700	6
P30050	RPL12	60S ribosomal protein L12 OS=Homo sapiens OX=9606	1	2	2	2	18.8	18.8	18.8	17.818	165	165	0	21.835	5758200	3
P26373	RPL13	60S ribosomal protein L13 OS=Homo sapiens OX=9606	5	6	6	6	23.7	23.7	23.7	24.261	211	211;126;54;63;78	0	39.535	16769000	8
P40429	RPL13A	60S ribosomal protein L13a OS=Homo sapiens OX=9606	6	10	10	10	34	34	34	23.577	203	203;210;142;102;46;48	0	60.192	45802000	13
E7EPB3	RPL14	60S ribosomal protein L14 OS=Homo sapiens OX=9606	2	4	4	4	34.7	34.7	34.7	14.558	124	124;215	0	28.312	25189000	10
A0A2R8YEM3	RPL15	Ribosomal protein L15 (Fragment) OS=Homo sapiens OX=9606	6	5	5	5	35.5	35.5	35.5	19.968	169	169;174;204;133;138;175	0	33.591	9937900	6
J3KRB3	RPL17	60S ribosomal protein L17 (Fragment) OS=Homo sapiens OX=9606	12	6	6	6	37.2	37.2	37.2	14.894	129	129;131;138;169;171;174;174;184;190;228;97;56	0	41.217	18042000	9
H0YHA7	RPL18	60S ribosomal protein L18 (Fragment) OS=Homo sapiens OX=9606	7	6	6	6	31.1	31.1	31.1	18.863	167	167;188;190;130;133;164;138	0	50.459	28905000	9
M0R3D6	RPL18A	60S ribosomal protein L18a (Fragment) OS=Homo sapiens OX=9606	5	6	6	6	47.5	47.5	47.5	16.714	141	141;147;176;154;137	0	44.255	32419000	8
J3QR09	RPL19	Ribosomal protein L19 OS=Homo sapiens OX=9606	3	5	5	5	27.5	27.5	27.5	23.134	193	193;194;196	0	37.071	13161000	6
M0R181	RPL21	60S ribosomal protein L21 (Fragment) OS=Homo sapiens OX=9606	4	5	5	5	36.1	36.1	36.1	14.149	122	122;160;87;59	0	44.909	20172000	5
P35268	RPL22	60S ribosomal protein L22 OS=Homo sapiens OX=9606	10	5	5	5	55.5	55.5	55.5	14.787	128	128;89;95;79;48;53;47;121;122;142	0	36.174	28654000	7
P62829	RPL23	60S ribosomal protein L23 OS=Homo sapiens OX=9606	6	6	6	6	32.1	32.1	32.1	14.865	140	140;91;122;81;114;34	0	40.239	7628600	5
P62750	RPL23A	60S ribosomal protein L23a OS=Homo sapiens OX=9606	6	3	3	3	12.2	12.2	12.2	17.695	156	156;158;170;175;194;70	0	18.778	6272400	3
C9JXB8	RPL24	60S ribosomal protein L24 OS=Homo sapiens OX=9606	3	4	4	4	34.7	34.7	34.7	14.369	121	121;150;157	0	28.078	10640000	5
J3QRI7	RPL26	60S ribosomal protein L26 (Fragment) OS=Homo sapiens OX=9606	10	6	6	6	52.3	52.3	52.3	12.63	107	107;107;110;145;128;135;145;63;38;63	0	39.298	29165000	8
P61353	RPL27	60S ribosomal protein L27 OS=Homo sapiens OX=9606	4	7	7	7	36.8	36.8	36.8	15.798	136	136;144;38;40	0	43.499	17181000	9
E9PLL6	RPL27A	60S ribosomal protein L27a OS=Homo sapiens OX=9606	4	4	4	4	33.3	33.3	33.3	12.201	108	108;148;91;113	0	27.678	23809000	6
H0YMF4	RPL28	60S ribosomal protein L28 OS=Homo sapiens OX=9606	4	4	4	4	33	33	33	12.39	112	112;137;170;89	0	26.857	11314000	6
P47914	RPL29	60S ribosomal protein L29 OS=Homo sapiens OX=9606	2	2	2	2	14.5	14.5	14.5	17.752	159	159;167	0	13.47	13896000	4
G5E9G0	RPL3	60S ribosomal protein L3 OS=Homo sapiens OX=9606	6	5	5	5	11.1	11.1	11.1	40.267	351	351;403;272;305;180;261	0	28.453	11534000	3
E5RI99	RPL30	60S ribosomal protein L30 (Fragment) OS=Homo sapiens OX=9606	5	4	4	4	43	43	43	12.656	114	114;115;56;51;96	0	31.139	9261400	3
D3YTB1	RPL32	60S ribosomal protein L32 (Fragment) OS=Homo sapiens OX=9606	4	7	7	7	45.9	45.9	45.9	15.616	133	133;135;153;62	0	52.951	20094000	7
P49207	RPL34	60S ribosomal protein L34 OS=Homo sapiens OX=9606	1	2	2	2	12.8	12.8	12.8	13.293	117	117	0	11.536	7471100	2
P42766	RPL35	60S ribosomal protein L35 OS=Homo sapiens OX=9606	2	7	7	7	39	39	39	14.551	123	123;96	0	56.095	16481000	6
P18077	RPL35A	60S ribosomal protein L35a OS=Homo sapiens OX=9606	4	4	4	4	23.6	23.6	23.6	12.538	110	110;55;57;94	0	25.021	10581000	5
Q9Y3U8	RPL36	60S ribosomal protein L36 OS=Homo sapiens OX=9606	3	5	5	5	31.4	31.4	31.4	12.254	105	105;94;68	0	31.083	8631700	5
C9J4Z3	RPL37A	60S ribosomal protein L37a OS=Homo sapiens OX=9606	7	2	2	2	39.7	39.7	39.7	7.624	68	68;92;58;60;72;75;88	0	12.955	1445500	2
J3KT73	RPL38	60S ribosomal protein L38 OS=Homo sapiens OX=9606	4	2	2	2	39.1	39.1	39.1	7.5649	64	64;67;70;21	0	15.236	9373400	4
P36578	RPL4	60S ribosomal protein L4 OS=Homo sapiens OX=9606	4	21	21	21	47.1	47.1	47.1	47.697	427	427;333;170;171	0	158.32	77614000	24
A0A2R8Y6J3	RPL5	60S ribosomal protein L5 (Fragment) OS=Homo sapiens OX=9606	4	12	12	12	56.3	56.3	56.3	27.045	238	238;297;130;170	0	85.5	51202000	16
Q02878	RPL6	60S ribosomal protein L6 OS=Homo sapiens OX=9606	7	14	14	14	41	41	41	32.728	288	288;159;160;63;105;118;120	0	100.31	25101000	12
A8MUD9	RPL7	60S ribosomal protein L7 OS=Homo sapiens OX=9606	4	13	13	13	54.8	54.8	54.8	24.433	208	208;248;99;88	0	97.526	61906000	17
P62424	RPL7A	60S ribosomal protein L7a OS=Homo sapiens OX=9606	3	12	12	12	39.1	39.1	39.1	29.995	266	266;151;191	0	90.701	92621000	16
P62917	RPL8	60S ribosomal protein L8 OS=Homo sapiens OX=9606	5	8	8	8	25.3	25.3	25.3	28.024	257	257;205;235;167;148	0	56.312	54102000	14
D6RAN4	RPL9	60S ribosomal protein L9 (Fragment) OS=Homo sapiens OX=9606	6	6	6	6	35.9	35.9	35.9	20.775	181	181;192;220;166;90;113	0	39.89	21896000	10
F8VU65	RPLP0	60S acidic ribosomal protein P0 (Fragment) OS=Homo sapiens OX=9606	13	9	9	9	49.4	49.4	49.4	27.187	247	247;281;317;166;244;246;142;153;156;317;121;111;107	0	61.291	24066000	10
P04843	RPN1	Dolichyl-diphosphooligosaccharide--protein glycosyltransferase subunit 1 OS=Homo sapiens OX=9606	3	3	3	3	6.9	6.9	6.9	68.569	607	607;121;435	0	21.006	5331200	3
Q5JYR4	RPN2	Dolichyl-diphosphooligosaccharide--protein glycosyltransferase subunit 2 (Fragment) OS=Homo sapiens OX=9606	4	3	3	3	31.3	31.3	31.3	18.17	166	166;344;631;162	0	30.937	4718500	3
Q9NQG5	RPRD1B	Regulation of nuclear pre-mRNA domain-containing protein 1B OS=Homo sapiens OX=9606	1	2	2	2	6.1	6.1	6.1	36.899	326	326	0	11.354	1002300	1
P46783	RPS10	40S ribosomal protein S10 OS=Homo sapiens OX=9606	6	2	2	2	20	20	20	18.898	165	165;121;172;186;213;291	0	16.534	3439400	2
P62280	RPS11	40S ribosomal protein S11 OS=Homo sapiens OX=9606	3	7	7	7	41.8	41.8	41.8	18.431	158	158;118;79	0	45.008	23237000	7
P25398	RPS12	40S ribosomal protein S12 OS=Homo sapiens OX=9606	1	4	4	4	32.6	32.6	32.6	14.515	132	132	0	28.745	8483200	6
P62277	RPS13	40S ribosomal protein S13 OS=Homo sapiens OX=9606	3	7	7	7	33.1	33.1	33.1	17.222	151	151;148;116	0	47.594	16117000	6
A0A2R8Y811	RPS14	40S ribosomal protein S14 (Fragment) OS=Homo sapiens OX=9606	3	7	7	7	42	42	42	16.159	150	150;151;134	0	61.644	19170000	9
K7EM56	RPS15	40S ribosomal protein S15 OS=Homo sapiens OX=9606	8	2	2	2	22.3	22.3	22.3	12.99	112	112;118;135;141;145;152;68;129	0	12.86	3428200	3
P62249	RPS16	40S ribosomal protein S16 OS=Homo sapiens OX=9606	6	9	9	9	51.4	51.4	51.4	16.445	146	146;129;100;85;50;152	0	61.535	19716000	10
P08708	RPS17	40S ribosomal protein S17 OS=Homo sapiens OX=9606	5	2	2	2	16.3	16.3	16.3	15.55	135	135;136;191;584;59	0	15.204	22436000	4
P62269	RPS18	40S ribosomal protein S18 OS=Homo sapiens OX=9606	4	11	11	11	53.3	53.3	53.3	17.718	152	152;33;34;82	0	74.413	27217000	13
P39019	RPS19	40S ribosomal protein S19 OS=Homo sapiens OX=9606	6	4	4	4	24.8	24.8	24.8	16.06	145	145;71;71;76;100;102	0	25.856	6298500	4
P15880	RPS2	40S ribosomal protein S2 OS=Homo sapiens OX=9606	7	6	6	6	23.2	23.2	23.2	31.324	293	293;195;235;155;209;218;197	0	43.145	12500000	7
P60866	RPS20	40S ribosomal protein S20 OS=Homo sapiens OX=9606	4	5	5	5	37.8	37.8	37.8	13.373	119	119;61;46;64	0	36.942	23517000	6
Q8WVC2	RPS21	40S ribosomal protein S21 OS=Homo sapiens OX=9606	3	2	2	2	34.6	34.6	34.6	8.85	81	81;83;90	0	16.497	4395100	2
P62266	RPS23	40S ribosomal protein S23 OS=Homo sapiens OX=9606	2	3	3	3	16.1	16.1	16.1	15.807	143	143;134	0	21.49	9251600	4
E7ETK0	RPS24	40S ribosomal protein S24 OS=Homo sapiens OX=9606	6	2	2	2	15.3	15.3	15.3	15.197	131	131;131;132;133;165;90	0.0022727	10.702	1969900	1
P62851	RPS25	40S ribosomal protein S25 OS=Homo sapiens OX=9606	1	3	3	3	24	24	24	13.742	125	125	0	21.434	15901000	4
Q5JNZ5	RPS26P11	Putative 40S ribosomal protein S26-like 1 OS=Homo sapiens OX=9606	2	3	3	3	31.3	31.3	31.3	13.002	115	115;115	0	22.526	27149000	5
P42677	RPS27	40S ribosomal protein S27 OS=Homo sapiens OX=9606	4	2	2	2	31	31	31	9.461	84	84;84;97;100	0	14.934	4371400	2
P62979	RPS27A	Ubiquitin-40S ribosomal protein S27a OS=Homo sapiens OX=9606	24	8	8	8	39.7	39.7	39.7	17.965	156	156;93;106;122;128;134;136;149;153;155;160;169;206;229;229;305;685;156;63;95;114;138;43;61	0	84.7	130020000	16
P23396	RPS3	40S ribosomal protein S3 OS=Homo sapiens OX=9606	12	9	9	9	39.9	39.9	39.9	26.688	243	243;117;135;158;123;231;91;115;128;171;44;33	0	59.537	25147000	11
P61247	RPS3A	40S ribosomal protein S3a OS=Homo sapiens OX=9606	12	13	13	13	50.4	50.4	50.4	29.945	264	264;223;208;227;193;205;190;145;125;95;101;65	0	99.166	35481000	11
P62701	RPS4X	40S ribosomal protein S4, X isoform OS=Homo sapiens OX=9606	2	11	11	6	39.5	39.5	22.8	29.597	263	263;263	0	75.581	44417000	17
M0QZN2	RPS5	40S ribosomal protein S5 OS=Homo sapiens OX=9606	4	3	3	3	19.4	19.4	19.4	14.763	134	134;200;204;225	0	21.358	18232000	4
P62753	RPS6	40S ribosomal protein S6 OS=Homo sapiens OX=9606	3	8	8	8	26.1	26.1	26.1	28.68	249	249;218;91	0	55.444	43985000	8
A0A2R8Y623	RPS7	40S ribosomal protein S7 (Fragment) OS=Homo sapiens OX=9606	3	2	2	2	18.3	18.3	18.3	19.405	169	169;187;194	0	20.443	14487000	3
Q5JR95	RPS8	40S ribosomal protein S8 OS=Homo sapiens OX=9606	2	10	10	10	58	58	58	21.879	188	188;208	0	82.045	40899000	14
A0A024R4M0	RPS9	#N/A	6	9	9	9	33	33	33	22.591	194	194;194;139;156;77;79	0	58.788	43453000	9
C9J9K3	RPSA	40S ribosomal protein SA (Fragment) OS=Homo sapiens OX=9606	4	9	9	9	38	38	38	29.404	263	263;295;300;116	0	78.27	25991000	14
Q9HB90	RRAGC	Ras-related GTP-binding protein C OS=Homo sapiens OX=9606	2	2	2	2	3.5	3.5	3.5	44.223	399	399;400	0	11.168	705620	1
E9PL69	RRM1	Ribonucleoside-diphosphate reductase large subunit OS=Homo sapiens OX=9606	2	3	3	3	7	7	7	64.836	570	570;792	0	18.34	1921600	1
F8W914	RTN4	Reticulon OS=Homo sapiens OX=9606	4	4	4	4	21.7	21.7	21.7	37.144	345	345;1192;203;127	0	27.281	31640000	6
Q9Y265	RUVBL1	RuvB-like 1 OS=Homo sapiens OX=9606	4	3	3	3	10.7	10.7	10.7	50.227	456	456;315;131;267	0	22.1	3239600	3
Q9Y230	RUVBL2	RuvB-like 2 OS=Homo sapiens OX=9606	6	4	4	4	10.2	10.2	10.2	51.156	463	463;259;354;39;50;109	0	26.021	2714500	3
P60903	S100A10	Protein S100-A10 OS=Homo sapiens OX=9606	1	3	3	3	32	32	32	11.203	97	97	0	19.283	6706900	4
P31949	S100A11	Protein S100-A11 OS=Homo sapiens OX=9606	1	2	2	2	27.6	27.6	27.6	11.74	105	105	0	22.547	5219000	2
P26447	S100A4	Protein S100-A4 OS=Homo sapiens OX=9606	1	5	5	5	31.7	31.7	31.7	11.728	101	101	0	36.736	62989000	12
R4GN98	S100A6	Protein S100 (Fragment) OS=Homo sapiens OX=9606	2	3	3	3	42.4	42.4	42.4	9.681	85	85;90	0	19.322	2139800	3
Q9UBE0	SAE1	SUMO-activating enzyme subunit 1 OS=Homo sapiens OX=9606	8	5	5	5	19.9	19.9	19.9	38.449	346	346;205;265;299;71;98;133;157	0	43.584	8135500	6
P82979	SARNP	SAP domain-containing ribonucleoprotein OS=Homo sapiens OX=9606	4	3	3	3	13.3	13.3	13.3	23.671	210	210;213;523;52	0	17.002	3996900	2
P49591	SARS1	Serine--tRNA ligase, cytoplasmic OS=Homo sapiens OX=9606	2	4	4	4	8.6	8.6	8.6	58.777	514	514;536	0	25.064	8213400	4
A0A087X020	SBDS	Ribosome maturation protein SBDS OS=Homo sapiens OX=9606	2	4	4	4	14.8	14.8	14.8	28.864	250	250;250	0	28.981	3288800	3
O14828	SCAMP3	Secretory carrier-associated membrane protein 3 OS=Homo sapiens OX=9606	1	4	4	4	13.5	13.5	13.5	38.287	347	347	0	29.353	5269800	3
B7ZKQ9	SCARB1	SCARB1 protein OS=Homo sapiens OX=9606	4	2	2	2	4.2	4.2	4.2	53.847	481	481;499;552;146	0	12.473	1248800	1
Q8NBX0	SCCPDH	Saccharopine dehydrogenase-like oxidoreductase OS=Homo sapiens OX=9606	1	11	11	11	32.6	32.6	32.6	47.151	429	429	0	86.464	54654000	12
Q12765	SCRN1	Secernin-1 OS=Homo sapiens OX=9606	1	2	2	2	6.5	6.5	6.5	46.382	414	414	0	15.17	886420	2
Q9BRK5	SDF4	45 kDa calcium-binding protein OS=Homo sapiens OX=9606	3	5	5	5	18.2	18.2	18.2	41.806	362	362;243;254	0	35.893	7996200	6
A0A087X1I3	SDHA	Flavoprotein subunit of complex II OS=Homo sapiens OX=9606	5	3	3	3	8.3	8.3	8.3	56.662	519	519;583;664;126;356	0	25.384	1991200	2
Q13228	SELENBP1	Methanethiol oxidase OS=Homo sapiens OX=9606	6	9	9	9	26.9	26.9	26.9	52.39	472	472;295;123;165;305;80	0	61.529	11323000	12
Q8NC51	SERBP1	Plasminogen activator inhibitor 1 RNA-binding protein OS=Homo sapiens OX=9606	1	3	3	3	7.6	7.6	7.6	44.965	408	408	0	19.369	2196500	3
P30740	SERPINB1	Leukocyte elastase inhibitor OS=Homo sapiens OX=9606	1	10	10	10	29.8	29.8	29.8	42.741	379	379	0	83.046	21175000	12
P35237	SERPINB6	Serpin B6 OS=Homo sapiens OX=9606	14	15	15	15	56.6	56.6	56.6	42.621	376	376;380;395;332;171;61;77;60;81;124;164;189;259;374	0	120.3	52001000	20
P50454	SERPINH1	Serpin H1 OS=Homo sapiens OX=9606	13	20	20	20	57.7	57.7	57.7	46.44	418	418;201;324;295;247;249;203;150;165;166;56;142;85	0	210.69	104860000	37
Q01105	SET	Protein SET OS=Homo sapiens OX=9606	4	10	10	10	42.1	42.1	42.1	33.488	290	290;266;292;302	0	143.49	107150000	19
Q8WTS6	SETD7	Histone-lysine N-methyltransferase SETD7 OS=Homo sapiens OX=9606	2	2	2	2	6.3	6.3	6.3	40.72	366	366;362	0	12.27	1715800	2
Q15393	SF3B3	Splicing factor 3B subunit 3 OS=Homo sapiens OX=9606	1	3	3	3	3.8	3.8	3.8	135.58	1217	1217	0	21.348	1342400	2
P31947	SFN	14-3-3 protein sigma OS=Homo sapiens OX=9606	1	16	14	14	59.7	59.7	59.7	27.774	248	248	0	131.83	70818000	23
P23246	SFPQ	Splicing factor, proline- and glutamine-rich OS=Homo sapiens OX=9606	1	2	2	2	4.5	4.5	4.5	76.149	707	707	0	14.934	4055900	3
Q9H9B4	SFXN1	Sideroflexin-1 OS=Homo sapiens OX=9606	6	16	16	15	52.5	52.5	46.6	35.619	322	322;193;177;144;56;22	0	118.8	80920000	30
O43765	SGTA	Small glutamine-rich tetratricopeptide repeat-containing protein alpha OS=Homo sapiens OX=9606	2	3	3	3	11.2	11.2	11.2	34.063	313	313;162	0	17.859	4138100	2
G3V2Y4	SHMT2	Glycine hydroxymethyltransferase (Fragment) OS=Homo sapiens OX=9606	5	2	2	2	13.2	13.2	13.2	25.676	234	234;504;215;237;264	0	12.014	748310	1
Q99720	SIGMAR1	Sigma non-opioid intracellular receptor 1 OS=Homo sapiens OX=9606	1	2	2	2	9.4	9.4	9.4	25.127	223	223	0	14.325	4946200	3
P53985	SLC16A1	Monocarboxylate transporter 1 OS=Homo sapiens OX=9606	3	2	2	2	7	7	7	53.944	500	500;296;456	0	21.303	9151400	3
O15427	SLC16A3	Monocarboxylate transporter 4 OS=Homo sapiens OX=9606	10	2	2	2	5.6	5.6	5.6	49.469	465	465;79;135;157;163;219;223;235;263;291	0	13.372	7321800	3
Q15758	SLC1A5	Neutral amino acid transporter B(0) OS=Homo sapiens OX=9606	2	2	2	2	3.7	3.7	3.7	56.598	541	541;365	0	11.646	7003900	2
Q9UBX3	SLC25A10	Mitochondrial dicarboxylate carrier OS=Homo sapiens OX=9606	4	7	7	7	28.9	28.9	28.9	31.282	287	287;442;406;113	0	47.734	13339000	7
I3L1P8	SLC25A11	Mitochondrial 2-oxoglutarate/malate carrier protein (Fragment) OS=Homo sapiens OX=9606	2	7	7	7	30.1	30.1	30.1	32.182	296	296;314	0	54.774	14537000	8
Q9H936	SLC25A22	Mitochondrial glutamate carrier 1 OS=Homo sapiens OX=9606	19	4	4	4	13.6	13.6	13.6	34.47	323	323;97;103;114;117;127;134;156;161;177;190;196;197;247;313;65;72;78;315	0	26.613	5200000	4
Q6NUK1	SLC25A24	Calcium-binding mitochondrial carrier protein SCaMC-1 OS=Homo sapiens OX=9606	3	10	10	10	22.4	22.4	22.4	53.354	477	477;270;110	0	67.069	22383000	12
Q00325	SLC25A3	Phosphate carrier protein, mitochondrial OS=Homo sapiens OX=9606	5	13	13	13	36.2	36.2	36.2	40.094	362	362;324;153;154;156	0	100.3	67824000	18
P05141	SLC25A5	ADP/ATP translocase 2 OS=Homo sapiens OX=9606	2	25	25	13	51.7	51.7	30.9	32.852	298	298;315	0	229.58	270520000	32
P12236	SLC25A6	ADP/ATP translocase 3 OS=Homo sapiens OX=9606	3	20	8	8	51.3	26.8	26.8	32.866	298	298;298;208	0	88.19	21295000	10
P11166	SLC2A1	Solute carrier family 2, facilitated glucose transporter member 1 OS=Homo sapiens OX=9606	3	3	3	3	6.7	6.7	6.7	54.083	492	492;496;520	0	21.172	9388200	4
F5GZS6	SLC3A2	4F2 cell-surface antigen heavy chain OS=Homo sapiens OX=9606	9	21	21	21	35.2	35.2	35.2	64.872	599	599;630;631;247;145;175;135;47;122	0	169.84	257360000	30
E9PS74	SLC43A3	Solute carrier family 43 member 3 (Fragment) OS=Homo sapiens OX=9606	3	2	2	2	6.6	6.6	6.6	36.797	331	331;491;137	0	41.945	2882200	2
Q01650	SLC7A5	Large neutral amino acids transporter small subunit 1 OS=Homo sapiens OX=9606	6	5	5	5	10.7	10.7	10.7	55.01	507	507;168;241;245;511;515	0	33.624	44907000	9
O14745	SLC9A3R1	Na(+)/H(+) exchange regulatory cofactor NHE-RF1 OS=Homo sapiens OX=9606	3	6	6	6	26.3	26.3	26.3	38.868	358	358;215;35	0	40.152	9616100	4
Q92922	SMARCC1	SWI/SNF complex subunit SMARCC1 OS=Homo sapiens OX=9606	3	2	2	2	2.4	2.4	2.4	122.87	1105	1105;1214;1245	0	12.454	806110	2
Q9UQE7	SMC3	Structural maintenance of chromosomes protein 3 OS=Homo sapiens OX=9606	1	2	2	2	2	2	2	141.54	1217	1217	0	11.043	2424700	2
Q7KZF4	SND1	Staphylococcal nuclease domain-containing protein 1 OS=Homo sapiens OX=9606	2	4	4	4	4.9	4.9	4.9	102	910	910;231	0	27.063	6971500	3
J3QLI9	SNRPD1	Small nuclear ribonucleoprotein Sm D1 OS=Homo sapiens OX=9606	2	2	2	2	44	44	44	8.3926	75	75;119	0	16.343	5781700	2
J3QLE5	SNRPN	Small nuclear ribonucleoprotein-associated protein N (Fragment) OS=Homo sapiens OX=9606	5	5	5	5	24.9	24.9	24.9	17.546	169	169;240;240;59;70	0	30.307	8668200	7
O60749	SNX2	Sorting nexin-2 OS=Homo sapiens OX=9606	2	3	3	3	6.7	6.7	6.7	58.47	519	519;265	0	18.273	2353800	2
P00441	SOD1	Superoxide dismutase [Cu-Zn] OS=Homo sapiens OX=9606	2	7	7	7	82.5	82.5	82.5	15.936	154	154;135	0	57.161	20572000	7
F5H3C5	SOD2	Superoxide dismutase (Fragment) OS=Homo sapiens OX=9606	5	3	3	3	30.6	30.6	30.6	12.13	111	111;183;190;222;61	0	18.522	8204900	3
E9PRB9	SPCS2	Microsomal signal peptidase 25 kDa subunit OS=Homo sapiens OX=9606	5	2	2	2	18.4	18.4	18.4	10.163	87	87;157;226;227;257	0	11.289	2073100	2
E7EMC7	SQSTM1	Sequestosome-1 OS=Homo sapiens OX=9606	6	2	2	2	9.8	9.8	9.8	41.013	378	378;440;69;73;167;190	0	13.62	1633900	1
P19623	SRM	Spermidine synthase OS=Homo sapiens OX=9606	5	10	10	10	36.4	36.4	36.4	33.824	302	302;119;134;83;93	0	71.72	33782000	12
Q9Y5M8	SRPRB	Signal recognition particle receptor subunit beta OS=Homo sapiens OX=9606	2	3	3	3	18.1	18.1	18.1	29.702	271	271;160	0	22.297	4089600	4
P05455	SSB	Lupus La protein OS=Homo sapiens OX=9606	4	13	13	13	35.3	35.3	35.3	46.836	408	408;134;184;120	0	128.97	59511000	17
P51571	SSR4	Translocon-associated protein subunit delta OS=Homo sapiens OX=9606	2	4	4	4	15.6	15.6	15.6	18.998	173	173;148	0	32.106	5878500	6
P50502	ST13	Hsc70-interacting protein OS=Homo sapiens OX=9606	7	7	7	7	25.2	25.2	25.2	41.331	369	369;146;211;240;162;369;38	0	49.82	10172000	8
P31948	STIP1	Stress-induced-phosphoprotein 1 OS=Homo sapiens OX=9606	4	20	20	20	41.4	41.4	41.4	62.639	543	543;236;138;137	0	174.19	85266000	32
Q8NBY1	STK26	Serine/threonine-protein kinase 26 OS=Homo sapiens OX=9606	13	2	2	2	4.1	4.1	4.1	43.867	392	392;416;438;148;161;163;177;209;247;369;412;426;443	0.002265	10.667	1524600	1
A2A2D0	STMN1	Stathmin (Fragment) OS=Homo sapiens OX=9606	2	2	2	2	31.8	31.8	31.8	9.7931	85	85;149	0	12.204	5083100	5
P27105	STOM	Stomatin OS=Homo sapiens OX=9606	2	9	9	9	38.2	38.2	38.2	31.73	288	288;168	0	93.428	26849000	11
Q9Y3F4	STRAP	Serine-threonine kinase receptor-associated protein OS=Homo sapiens OX=9606	2	7	7	7	26.6	26.6	26.6	38.438	350	350;95	0	58.196	14531000	9
P53999	SUB1	Activated RNA polymerase II transcriptional coactivator p15 OS=Homo sapiens OX=9606	1	2	2	2	30.7	30.7	30.7	14.395	127	127	0	13.771	3415900	2
H3BRY5	SULT1A1	Sulfotransferase (Fragment) OS=Homo sapiens OX=9606	7	7	7	5	27	27	21	32.625	281	281;295;295;262;192;169;221	0	43.193	9775800	6
Q8NBJ7	SUMF2	Inactive C-alpha-formylglycine-generating enzyme 2 OS=Homo sapiens OX=9606	14	7	7	7	21.6	21.6	21.6	33.843	301	301;320;274;286;305;352;358;304;232;165;183;236;102;150	0	48.02	14384000	6
B7Z645	SYNCRIP	Heterogeneous nuclear ribonucleoprotein Q OS=Homo sapiens OX=9606	3	6	6	3	14.2	14.2	7.5	52.046	464	464;623;185	0	39.014	12541000	5
P37802	TAGLN2	Transgelin-2 OS=Homo sapiens OX=9606	4	13	13	13	68.8	68.8	68.8	22.391	199	199;187;115;199	0	108.64	38482000	15
P37837	TALDO1	Transaldolase OS=Homo sapiens OX=9606	2	13	13	13	39.2	39.2	39.2	37.54	337	337;318	0	93.198	61156000	13
A0A0G2JKZ1	TAPBP	Tapasin OS=Homo sapiens OX=9606	8	3	3	3	7.6	7.6	7.6	47.606	448	448;448;466;466;504;361;156;192	0	19.607	4237700	3
P26639	TARS1	Threonine--tRNA ligase 1, cytoplasmic OS=Homo sapiens OX=9606	13	42	42	42	57.8	57.8	57.8	83.434	723	723;129;118;131;50;766;802;55;56;66;443;636;718	0	309.54	190350000	56
Q9NVG8	TBC1D13	TBC1 domain family member 13 OS=Homo sapiens OX=9606	1	3	3	3	7.8	7.8	7.8	46.553	400	400	0	16.08	1487100	2
E5RIW3	TBCA	Tubulin-specific chaperone A OS=Homo sapiens OX=9606	4	2	2	2	34.5	34.5	34.5	10.08	84	84;108;119;131	0	16.655	14935000	3
P17987	TCP1	T-complex protein 1 subunit alpha OS=Homo sapiens OX=9606	9	8	8	8	16	16	16	60.343	556	556;401;433;332;221;111;136;91;100	0	52.62	21173000	10
Q92734	TFG	Protein TFG OS=Homo sapiens OX=9606	4	5	5	5	20.8	20.8	20.8	43.447	400	400;157;181;128	0	34.182	7182200	3
P02786	TFRC	Transferrin receptor protein 1 OS=Homo sapiens OX=9606	4	24	24	24	33.6	33.6	33.6	84.87	760	760;679;118;81	0	200.53	74203000	28
P52888	THOP1	Thimet oligopeptidase OS=Homo sapiens OX=9606	5	4	4	4	6.4	6.4	6.4	78.839	689	689;176;568;204;260	0	25.093	4094900	3
H0YCY6	TKFC	ATP-dependent dihydroxyacetone kinase (Fragment) OS=Homo sapiens OX=9606	4	6	6	6	15	15	15	54.661	533	533;575;219;162	0	38.823	4978000	5
P29401	TKT	Transketolase OS=Homo sapiens OX=9606	5	25	25	25	45.1	45.1	45.1	67.877	623	623;457;334;153;81	0	231.09	138460000	41
Q99805	TM9SF2	Transmembrane 9 superfamily member 2 OS=Homo sapiens OX=9606	1	3	3	3	3.9	3.9	3.9	75.775	663	663	0	16.112	1094000	1
J3QQY2	TMCO1	Calcium load-activated calcium channel OS=Homo sapiens OX=9606	3	2	2	2	22.1	22.1	22.1	11.372	104	104;239;143	0	11.814	3446200	2
P49755	TMED10	Transmembrane emp24 domain-containing protein 10 OS=Homo sapiens OX=9606	2	7	7	7	31.1	31.1	31.1	24.976	219	219;153	0	96.013	41614000	12
A0A0A6YYA0	TMED7-TICAM2	Protein TMED7-TICAM2 OS=Homo sapiens OX=9606	2	3	3	3	22.3	22.3	22.3	21.233	188	188;224	0	25.74	13224000	6
Q9BVK6	TMED9	Transmembrane emp24 domain-containing protein 9 OS=Homo sapiens OX=9606	1	5	5	5	11.9	11.9	11.9	27.277	235	235	0	33.382	7917800	5
Q8WUH6	TMEM263	Transmembrane protein 263 OS=Homo sapiens OX=9606	1	2	2	2	31	31	31	11.748	116	116	0	11.138	2697500	1
D6RAA6	TMEM33	Transmembrane protein 33 (Fragment) OS=Homo sapiens OX=9606	3	4	4	4	18.9	18.9	18.9	25.223	222	222;247;155	0	25.366	3525700	5
Q9BTV4	TMEM43	Transmembrane protein 43 OS=Homo sapiens OX=9606	2	7	7	7	26.5	26.5	26.5	44.875	400	400;133	0	44.727	11669000	8
P63313	TMSB10	Thymosin beta-10 OS=Homo sapiens OX=9606	1	3	3	3	68.2	68.2	68.2	5.0256	44	44	0	21.022	6959300	4
Q9H3N1	TMX1	Thioredoxin-related transmembrane protein 1 OS=Homo sapiens OX=9606	1	2	2	2	8.6	8.6	8.6	31.791	280	280	0	13.928	2556800	1
Q96JJ7	TMX3	Protein disulfide-isomerase TMX3 OS=Homo sapiens OX=9606	1	2	2	2	6.8	6.8	6.8	51.871	454	454	0	14.303	3746200	2
Q92973	TNPO1	Transportin-1 OS=Homo sapiens OX=9606	4	2	2	2	2.3	2.3	2.3	102.35	898	898;136;766;897	0	12.102	1321300	2
O96008	TOMM40	Mitochondrial import receptor subunit TOM40 homolog OS=Homo sapiens OX=9606	3	5	5	5	16.1	16.1	16.1	37.893	361	361;168;214	0	35.282	16377000	6
O94826	TOMM70	Mitochondrial import receptor subunit TOM70 OS=Homo sapiens OX=9606	1	3	3	3	4.8	4.8	4.8	67.454	608	608	0	20.556	3443600	3
Q8NFQ8	TOR1AIP2	Torsin-1A-interacting protein 2 OS=Homo sapiens OX=9606	1	2	2	2	7.2	7.2	7.2	51.263	470	470	0	12.316	1773600	4
P55327	TPD52	Tumor protein D52 OS=Homo sapiens OX=9606	4	5	5	4	28.6	28.6	21.9	24.327	224	224;278;60;148	0	39.251	23715000	7
O43399	TPD52L2	Tumor protein D54 OS=Homo sapiens OX=9606	3	7	7	7	40.3	40.3	40.3	22.237	206	206;222;152	0	68.068	27284000	8
P60174	TPI1	Triosephosphate isomerase OS=Homo sapiens OX=9606	4	26	26	26	80.4	80.4	80.4	30.791	286	286;113;98;38	0	306.7	742250000	45
A0A087WWU8	TPM3	Tropomyosin alpha-3 chain OS=Homo sapiens OX=9606	8	9	9	4	46.3	46.3	24.2	26.42	227	227;232;285;95;214;285;285;49	0	74.039	43508000	11
P13693	TPT1	Translationally-controlled tumor protein OS=Homo sapiens OX=9606	8	5	5	5	25	25	25	19.595	172	172;188;197;160;162;140;77;139	0	40.496	31989000	8
A6NKE1	TRAPPC3	Trafficking protein particle complex subunit 3 OS=Homo sapiens OX=9606	3	2	2	2	13.6	13.6	13.6	13.343	118	118;180;188	0	13.082	2472100	2
Q15645	TRIP13	Pachytene checkpoint protein 2 homolog OS=Homo sapiens OX=9606	2	2	2	2	6	6	6	48.55	432	432;249	0	12.521	1435100	2
E9PGT1	TSN	Component 3 of promoter of RISC OS=Homo sapiens OX=9606	3	9	9	9	53.8	53.8	53.8	25.572	223	223;228;185	0	86.753	26626000	11
Q99598	TSNAX	Translin-associated protein X OS=Homo sapiens OX=9606	5	7	7	7	25.5	25.5	25.5	33.112	290	290;163;186;188;138	0	47.781	12443000	8
B1AH87	TSPO	Peripheral-type benzodiazepine receptor (Fragment) OS=Homo sapiens OX=9606	2	3	3	3	36.4	36.4	36.4	11.896	107	107;169	0	22.27	11602000	4
P68363	TUBA1B	Tubulin alpha-1B chain OS=Homo sapiens OX=9606	25	18	18	3	54.3	54.3	12	50.151	451	451;451;448;450;450;449;450;467;246;156;219;275;112;130;446;75;81;49;47;119;153;180;198;231;241	0	165.07	142500000	33
Q9BQE3	TUBA1C	Tubulin alpha-1C chain OS=Homo sapiens OX=9606	3	17	2	2	51.7	9.1	9.1	49.895	449	449;519;325	0	13.935	3365600	2
Q5JP53	TUBB	Tubulin beta chain OS=Homo sapiens OX=9606	14	23	4	3	56.1	16.9	13.4	47.766	426	426;444;372;450;797;338;446;189;451;536;97;118;148;164	0	40.735	68136000	12
P68371	TUBB4B	Tubulin beta-4B chain OS=Homo sapiens OX=9606	14	24	24	3	58	58	13	49.83	445	445;444;444;155;103;107;109;110;160;144;157;167;104;119	0	281.19	178610000	50
Q12792	TWF1	Twinfilin-1 OS=Homo sapiens OX=9606	4	5	5	5	19.1	19.1	19.1	40.282	350	350;291;59;113	0	78.084	17420000	5
Q6IBS0	TWF2	Twinfilin-2 OS=Homo sapiens OX=9606	4	3	3	3	14.3	14.3	14.3	39.548	349	349;254;1186;55	0	27.186	1603500	4
P10599	TXN	Thioredoxin OS=Homo sapiens OX=9606	1	3	3	3	30.5	30.5	30.5	11.737	105	105	0	24.514	48895000	6
O95881	TXNDC12	Thioredoxin domain-containing protein 12 OS=Homo sapiens OX=9606	1	2	2	2	17.4	17.4	17.4	19.206	172	172	0	13.535	2392200	1
Q9BRA2	TXNDC17	Thioredoxin domain-containing protein 17 OS=Homo sapiens OX=9606	4	2	2	2	15.4	15.4	15.4	13.941	123	123;75;80;98	0	11.125	2619300	3
Q8NBS9	TXNDC5	Thioredoxin domain-containing protein 5 OS=Homo sapiens OX=9606	1	14	14	14	38.2	38.2	38.2	47.628	432	432	0	125.12	88601000	17
O43396	TXNL1	Thioredoxin-like protein 1 OS=Homo sapiens OX=9606	4	2	2	2	10	10	10	32.251	289	289;27;69;281	0	13.514	3602300	2
E2QRB9	TXNRD1	Thioredoxin-disulfide reductase OS=Homo sapiens OX=9606	11	10	10	10	28.7	28.7	28.7	50.723	460	460;482;498;548;568;648;649;175;103;44;139	0	76.831	25825000	14
A0A494C0L6	TYMP	Thymidine phosphorylase (Fragment) OS=Homo sapiens OX=9606	5	3	3	3	14.2	14.2	14.2	29.597	289	289;445;482;169;73	0	21.578	3340500	5
Q16222	UAP1	UDP-N-acetylhexosamine pyrophosphorylase OS=Homo sapiens OX=9606	2	9	9	9	16.5	16.5	16.5	58.768	522	522;507	0	58.465	16159000	9
P22314	UBA1	Ubiquitin-like modifier-activating enzyme 1 OS=Homo sapiens OX=9606	7	36	36	36	49.4	49.4	49.4	117.85	1058	1058;506;270;284;173;195;234	0	317.36	244180000	48
Q9UBT2	UBA2	SUMO-activating enzyme subunit 2 OS=Homo sapiens OX=9606	6	15	15	15	25.2	25.2	25.2	71.223	640	640;262;215;54;74;166	0	102.47	40100000	17
F8W8D4	UBA3	NEDD8-activating enzyme E1 catalytic subunit OS=Homo sapiens OX=9606	2	2	2	2	4	4	4	47.271	422	422;463	0	12.484	6690000	3
E7EWE1	UBA5	UFM1-activating enzyme OS=Homo sapiens OX=9606	7	5	5	5	13.8	13.8	13.8	38.753	347	347;377;404;79;108;64;110	0	35.552	9011300	6
A0AVT1	UBA6	Ubiquitin-like modifier-activating enzyme 6 OS=Homo sapiens OX=9606	2	6	6	6	6	6	6	117.97	1052	1052;88	0	37.612	4141700	5
C9JZG9	UBE2H	Ubiquitin-conjugating enzyme E2 H (Fragment) OS=Homo sapiens OX=9606	5	2	2	2	23.3	23.3	23.3	11.545	103	103;123;183;62;149	0	14.004	2368200	3
H3BPC4	UBE2I	SUMO-conjugating enzyme UBC9 (Fragment) OS=Homo sapiens OX=9606	4	2	2	2	37.1	37.1	37.1	7.8891	70	70;137;158;184	0	13.108	4188300	2
P61086	UBE2K	Ubiquitin-conjugating enzyme E2 K OS=Homo sapiens OX=9606	2	4	4	4	28.5	28.5	28.5	22.406	200	200;123	0	32.683	20659000	6
P61088	UBE2N	Ubiquitin-conjugating enzyme E2 N OS=Homo sapiens OX=9606	6	6	6	6	44.1	44.1	44.1	17.138	152	152;105;152;87;89;153	0	42.656	31137000	11
Q13404	UBE2V1	Ubiquitin-conjugating enzyme E2 variant 1 OS=Homo sapiens OX=9606	9	7	7	4	41.5	41.5	29.3	16.495	147	147;105;370;103;105;109;52;89;154	0	50.174	36018000	9
E9PJ81	UBXN1	UBX domain-containing protein 1 (Fragment) OS=Homo sapiens OX=9606	4	3	3	3	12.4	12.4	12.4	32.611	290	290;293;297;238	0	20.562	2219300	2
A0A087WTB8	UCHL3	Ubiquitin carboxyl-terminal hydrolase OS=Homo sapiens OX=9606	3	4	4	4	23.7	23.7	23.7	21.945	194	194;228;230	0	25.397	4935700	5
Q9Y5K5	UCHL5	Ubiquitin carboxyl-terminal hydrolase isozyme L5 OS=Homo sapiens OX=9606	8	3	3	3	11.2	11.2	11.2	37.606	329	329;355;368;115;183;218;258;99	0	16.875	1576700	2
O60701	UGDH	UDP-glucose 6-dehydrogenase OS=Homo sapiens OX=9606	7	20	20	20	53.2	53.2	53.2	55.023	494	494;84;130;153;181;53;55	0	186.85	79105000	22
Q9NYU2	UGGT1	UDP-glucose:glycoprotein glucosyltransferase 1 OS=Homo sapiens OX=9606	5	31	31	31	24.2	24.2	24.2	177.19	1555	1555;131;1516;54;58	0	216.08	66482000	32
A0A087WYS1	UGP2	UTP--glucose-1-phosphate uridylyltransferase OS=Homo sapiens OX=9606	10	9	9	9	23.4	23.4	23.4	56.967	508	508;508;517;212;150;170;175;104;135;76	0	71.426	29515000	13
P11172	UMPS	Uridine 5'-monophosphate synthase OS=Homo sapiens OX=9606	5	10	10	10	27.5	27.5	27.5	52.221	480	480;342;57;66;142	0	64.812	21451000	11
P31930	UQCRC1	Cytochrome b-c1 complex subunit 1, mitochondrial OS=Homo sapiens OX=9606	1	2	2	2	7.5	7.5	7.5	52.645	480	480	0	11.589	1132800	2
P54578	USP14	Ubiquitin carboxyl-terminal hydrolase 14 OS=Homo sapiens OX=9606	4	9	9	9	22.3	22.3	22.3	56.068	494	494;448;20;28	0	61.643	19786000	9
P45974	USP5	Ubiquitin carboxyl-terminal hydrolase 5 OS=Homo sapiens OX=9606	2	3	3	3	4.8	4.8	4.8	95.785	858	858;137	0	23.475	4352400	3
Q9BV40	VAMP8	Vesicle-associated membrane protein 8 OS=Homo sapiens OX=9606	3	2	2	2	24	24	24	11.438	100	100;74;99	0	11.619	2663500	1
Q9P0L0	VAPA	Vesicle-associated membrane protein-associated protein A OS=Homo sapiens OX=9606	2	6	6	5	22.9	22.9	18.1	27.893	249	249;29	0	41.206	6551700	6
O95292	VAPB	Vesicle-associated membrane protein-associated protein B/C OS=Homo sapiens OX=9606	2	4	3	3	16.9	11.9	11.9	27.228	243	243;71	0	19.456	3625200	2
P50552	VASP	Vasodilator-stimulated phosphoprotein OS=Homo sapiens OX=9606	3	2	2	2	6.3	6.3	6.3	39.829	380	380;59;103	0	13.977	2811000	2
Q99536	VAT1	Synaptic vesicle membrane protein VAT-1 homolog OS=Homo sapiens OX=9606	8	15	15	15	48.1	48.1	48.1	41.92	393	393;125;146;151;154;30;92;1179	0	113.79	71255000	19
P61758	VBP1	Prefoldin subunit 3 OS=Homo sapiens OX=9606	1	2	2	2	17.8	17.8	17.8	22.626	197	197	0	12.544	2840900	2
P18206	VCL	Vinculin OS=Homo sapiens OX=9606	2	23	23	23	30	30	30	123.8	1134	1134;57	0	179.75	62439000	29
P55072	VCP	Transitional endoplasmic reticulum ATPase OS=Homo sapiens OX=9606	3	41	41	41	54.6	54.6	54.6	89.321	806	806;115;160	0	323.31	157730000	52
P21796	VDAC1	Voltage-dependent anion-selective channel protein 1 OS=Homo sapiens OX=9606	2	10	10	10	40.3	40.3	40.3	30.772	283	283;183	0	90.474	37674000	18
A0A0A0MR02	VDAC2	Outer mitochondrial membrane protein porin 2 (Fragment) OS=Homo sapiens OX=9606	5	8	8	8	35.5	35.5	35.5	30.348	282	282;294;194;204;109	0	64.814	34081000	10
O75436	VPS26A	Vacuolar protein sorting-associated protein 26A OS=Homo sapiens OX=9606	3	2	2	2	8	8	8	38.169	327	327;63;226	0	12.329	1992000	2
Q96QK1	VPS35	Vacuolar protein sorting-associated protein 35 OS=Homo sapiens OX=9606	1	3	3	3	3.8	3.8	3.8	91.706	796	796	0	18.497	2869800	1
P23381	WARS1	Tryptophan--tRNA ligase, cytoplasmic OS=Homo sapiens OX=9606	27	18	18	18	46.1	46.1	46.1	53.165	471	471;223;226;212;140;153;154;150;152;177;124;185;107;114;25;33;36;40;55;58;63;68;70;86;97;104;105	0	142.43	77287000	27
O75083	WDR1	WD repeat-containing protein 1 OS=Homo sapiens OX=9606	2	3	3	3	6.9	6.9	6.9	66.193	606	606;245	0	20.884	7822700	4
H7BY83	WDR44	WD repeat-containing protein 44 (Fragment) OS=Homo sapiens OX=9606	2	5	5	5	7.7	7.7	7.7	89.847	806	806;913	0	38.818	10420000	5
Q5T6H7	XPNPEP1	Xaa-Pro aminopeptidase 1 OS=Homo sapiens OX=9606	4	6	6	6	14.5	14.5	14.5	62.138	552	552;623;233;303	0	51.839	26815000	8
B1AHC9	XRCC6	ATP-dependent DNA helicase 2 subunit 1 OS=Homo sapiens OX=9606	2	4	4	4	8.1	8.1	8.1	64.283	559	559;609	0	21.807	2865600	1
P54577	YARS1	Tyrosine--tRNA ligase, cytoplasmic OS=Homo sapiens OX=9606	2	4	4	4	8.9	8.9	8.9	59.143	528	528;388	0	26.273	2108000	4
P67809	YBX1	Y-box-binding protein 1 OS=Homo sapiens OX=9606	3	5	5	3	25.3	25.3	20.4	35.924	324	324;374;216	0	41.028	8256100	6
P31946	YWHAB	14-3-3 protein beta/alpha OS=Homo sapiens OX=9606	5	19	13	11	63.4	54.5	54.5	28.082	246	246;74;100;149;81	0	189.37	114230000	21
P62258	YWHAE	14-3-3 protein epsilon OS=Homo sapiens OX=9606	6	22	20	20	68.2	68.2	68.2	29.174	255	255;94;107;115;109;38	0	198.26	103850000	30
P61981	YWHAG	14-3-3 protein gamma OS=Homo sapiens OX=9606	1	16	11	11	60.7	48.6	48.6	28.302	247	247	0	98.269	134570000	14
Q04917	YWHAH	14-3-3 protein eta OS=Homo sapiens OX=9606	4	9	6	6	37.8	31.3	31.3	28.218	246	246;162;39;72	0	58.904	11976000	9
P27348	YWHAQ	14-3-3 protein theta OS=Homo sapiens OX=9606	2	21	17	16	70.2	66.5	63.7	27.764	245	245;149	0	145.88	103770000	20
P63104	YWHAZ	14-3-3 protein zeta/delta OS=Homo sapiens OX=9606	10	22	22	17	69.8	69.8	63.7	27.745	245	245;246;137;168;75;92;98;125;130;51	0	300.14	235330000	25
O75844	ZMPSTE24	CAAX prenyl protease 1 homolog OS=Homo sapiens OX=9606	1	5	5	5	10.9	10.9	10.9	54.812	475	475	0	30.593	5220700	5
K7ERW9			3	2	2	2	11.5	11.5	11.5	21.872	200	200;331;348	0	13.363	2273100	2
H7C469		Peptidase A1 domain-containing protein (Fragment) OS=Homo sapiens OX=9606 PE=1 SV=7	13	2	2	2	6.5	6.5	6.5	35.785	336	336;405;405;406;409;410;412;189;199;276;299;557;582	0	13.393	1674700	2
E9PAM4		Phosphatidylinositol 4-kinase type 2 OS=Homo sapiens OX=9606 PE=3 SV=1	2	3	3	3	8	8	8	51.218	449	449;479	0	16.03	730540	2
A0A0A0MS41			4	9	8	8	36.1	30.2	30.2	35.503	321	321;321;325;177	0	56.801	32567000	11

## Sheet: RNase A-1
Majority protein IDs	Protein Name	Peptides	Razor + unique peptides	Unique peptides	Sequence coverage [%]	Unique + razor sequence coverage [%]	Unique sequence coverage [%]	Mol. weight [kDa]	Sequence length	Q-value	Score	Intensity	MS/MS count
H0YA55	ALB	7	2	2	10.6	4	4	51.459	454	0	16.915	514100	3
P08779	KRT16	10	2	2	19.9	4.7	4.7	51.267	473	0	18.186	490090	3
P02533	KRT14	10	6	2	20.1	14.8	4.9	51.561	472	0	78.805	2494900	11
J3QR09	RPL19	2	2	2	5.2	5.2	5.2	23.134	193	0	12.251	156870	2
P00338	LDHA	3	2	2	10.8	7.2	7.2	36.688	332	0	13.627	549480	2
I3L0S0	P4HB	2	2	2	12.2	12.2	12.2	16.215	148	0	12.07	0	2
P46779	RPL28	2	2	2	13.1	13.1	13.1	15.747	137	0	14.005	527570	2
E9PKZ0	RPL8	2	2	2	13.2	13.2	13.2	22.389	205	0	12.768	192580	2
E9PJD9	RPL27A	2	2	2	14.3	14.3	14.3	10.127	91	0	15.092	686510	4
P81605	DCD	2	2	2	20	20	20	11.284	110	0	11.817	319540	2
J3QSA3	UBB	2	2	2	44.2	44.2	44.2	4.8535	43	0	13.367	1047500	3
P08238	HSP90AB1	3	3	3	3.7	3.7	3.7	83.263	724	0	20.925	652460	3
Q5T749	KPRP	3	3	3	4.7	4.7	4.7	64.135	579	0	18.197	420550	3
E9PKE3	HSPA8	3	3	3	5.1	5.1	5.1	68.805	627	0	17.111	145620	3
E7EUT5	GAPDH	3	3	3	15	15	15	27.87	260	0	29.204	297610	3
P47914	RPL29	3	3	3	15.1	15.1	15.1	17.752	159	0	29.226	523880	3
P51858	HDGF	3	3	3	15.4	15.4	15.4	26.788	240	0	22.86	998480	4
J3QSB4	RPL13	3	3	3	17.5	17.5	17.5	14.692	126	0	18.987	363570	4
P14625	HSP90B1	4	4	4	4.5	4.5	4.5	92.468	803	0	32.439	785260	6
P13647	KRT5	12	8	4	22.9	15.9	8.8	62.378	590	0	82.093	6086000	14
P07195	LDHB	5	5	4	16.8	16.8	13.2	36.638	334	0	35.462	1389200	4
P19013	KRT4	6	5	5	10.7	9	9	57.285	534	0	45.135	3330100	7
P60174	TPI1	5	5	5	24.5	24.5	24.5	30.791	286	0	35.504	1369900	6
P00441	SOD1	5	5	5	37	37	37	15.936	154	0	30.891	1908700	7
P60709	ACTB	10	10	10	33.6	33.6	33.6	41.736	375	0	98.504	12502000	16
P13645	KRT10	21	21	15	38.7	38.7	32.4	58.826	584	0	292.11	16744000	31
P04264	KRT1	23	21	16	32	30.1	24.8	66.038	644	0	234.45	20696000	46
P35527	KRT9	20	19	19	36.9	35.8	35.8	62.064	623	0	227.02	16633000	29

## Sheet: RNase A-2
Majority protein IDs	Protein Name	Peptides	Razor + unique peptides	Unique peptides	Sequence coverage [%]	Unique + razor sequence coverage [%]	Unique sequence coverage [%]	Mol. weight [kDa]	Sequence length	Q-value	Score	Intensity	MS/MS count
P49588	AARS1	5	5	5	7.3	7.3	7.3	106.81	968	0	32.564	967040	8
H9KV75	ACTN1	6	2	2	8.8	2.9	2.9	94.825	822	0	11.509	252910	2
O43707	ACTN4	10	10	6	13.8	13.8	8.6	104.85	911	0	72.934	2192200	14
H0YA55	ALB	7	2	2	10.6	4	4	51.459	454	0	15.233	1013400	3
P04075	ALDOA	13	13	11	32.4	32.4	28	39.42	364	0	141.15	12446000	19
P05186	ALPL	2	2	2	4.4	4.4	4.4	57.304	524	0	13.834	757920	2
P05187	ALPP	6	6	3	14	14	7.5	57.953	535	0	53.53	3805600	7
H7BZ09	ANP32A	2	2	2	27.8	27.8	27.8	9.1874	79	0	13.529	149660	2
P04083	ANXA1	4	4	4	18.2	18.2	18.2	38.714	346	0	70.435	2029300	5
P07355	ANXA2	13	13	13	41.3	41.3	41.3	38.604	339	0	123.29	4958800	19
P08758	ANXA5	6	6	6	22.2	22.2	22.2	35.936	320	0	49.444	3170700	7
P13798	APEH	3	3	3	4.1	4.1	4.1	81.224	732	0	19.73	1069300	4
H0Y512	APMAP	2	2	2	4.4	4.4	4.4	45.294	409	0	12.244	400150	3
H3BSW3	APRT	4	4	4	61.9	61.9	61.9	6.9189	63	0	54.159	1445900	4
P00966	ASS1	7	7	7	20.4	20.4	20.4	46.53	412	0	49.72	1178900	7
P31939	ATIC	2	2	2	4.7	4.7	4.7	64.615	592	0	13.223	776380	0
P05023	ATP1A1	8	8	8	9.4	9.4	9.4	112.89	1023	0	59.15	2068400	11
E7ERY9	ATP2B1	2	2	2	2.3	2.3	2.3	106.86	963	0	13.086	241020	2
P25705	ATP5F1A	2	2	2	4.2	4.2	4.2	59.75	553	0	12.769	377920	1
P38606	ATP6V1A	2	2	2	5.2	5.2	5.2	68.303	617	0	15.024	303850	6
K7ES02	BLMH	3	3	3	13.8	13.8	13.8	37.198	318	0	25.287	1934400	3
A0A087WUV8	BSG	2	2	2	18	18	18	20.542	189	0	11.47	192900	2
Q9HB71	CACYBP	2	2	2	8.3	8.3	8.3	26.21	228	0	15.473	336140	3
P27797	CALR	7	7	7	10.8	10.8	10.8	48.141	417	0	57.548	3818800	9
P27824	CANX	4	4	4	9.5	9.5	9.5	67.567	592	0	25.438	706500	5
Q01518	CAP1	4	4	4	11.2	11.2	11.2	51.901	475	0	34.135	2747500	5
P07384	CAPN1	3	3	3	4.8	4.8	4.8	81.889	714	0	18.664	750850	3
B1AK87	CAPZB	3	3	3	12.7	12.7	12.7	29.295	260	0	20.714	900340	2
B4DUR8	CCT3	3	3	3	6.8	6.8	6.8	55.674	500	0	19.341	463490	3
P50991	CCT4	2	2	2	4.3	4.3	4.3	57.924	539	0	14.385	263470	1
P50990	CCT8	4	4	4	10	10	10	59.62	548	0	31.365	919630	5
P23528	CFL1	9	9	7	52.4	52.4	45.2	18.502	166	0	123.67	27213000	20
Q9H444	CHMP4B	3	3	3	17	17	17	24.95	224	0	20.556	504250	4
Q9UHD1	CHORDC1	2	2	2	6.6	6.6	6.6	37.489	332	0	11.093	162670	2
O00299	CLIC1	4	4	4	21.2	21.2	21.2	26.922	241	0	36.909	5554600	5
Q8NBJ5	COLGALT1	2	2	2	4	4	4	71.635	622	0	11.542	342020	1
Q14019	COTL1	2	2	2	14.1	14.1	14.1	15.945	142	0	15.494	2348200	2
P32929	CTH	2	2	2	5.9	5.9	5.9	44.508	405	0	13.04	404610	3
F5GY55	DDB1	2	2	2	3.8	3.8	3.8	121.71	1092	0	11.788	261790	3
Q9NY33	DPP3	4	4	4	6.1	6.1	6.1	82.588	737	0	27.632	741350	5
F6RFD5	DSTN	5	3	3	31.9	23	23	15.397	135	0	20.407	2027400	5
H0YNW5	DUT	4	4	4	20.4	20.4	20.4	17.827	167	0	28.217	2688900	6
Q5VTE0	EEF1A1P5	11	11	4	21.6	21.6	10.4	50.184	462	0	76.921	16209000	16
Q05639	EEF1A2	9	2	2	18.6	7.3	7.3	50.47	463	0	12.575	3666200	3
P26641	EEF1G	5	5	5	12.1	12.1	12.1	50.118	437	0	48.727	1064000	4
P13639	EEF2	10	10	10	12.1	12.1	12.1	95.337	858	0	70.455	3821900	14
P05198	EIF2S1	2	2	2	7	7	7	36.112	315	0	11.348	182040	2
P60842	EIF4A1	3	3	3	9.9	9.9	9.9	46.153	406	0	19.69	1816800	4
P56537	EIF6	3	3	3	17.1	17.1	17.1	26.599	245	0	19.781	605210	2
P06733	ENO1	28	28	28	56.5	56.5	56.5	47.168	434	0	258.59	34347000	39
V9GYZ6	EPRS1	2	2	2	2.5	2.5	2.5	109.04	968	0	10.947	93706	2
Q96HE7	ERO1A	2	2	2	5.3	5.3	5.3	54.392	468	0	11.401	150650	2
P30040	ERP29	3	3	3	14.2	14.2	14.2	28.993	261	0	20.267	1203000	4
Q9BS26	ERP44	5	5	5	11.3	11.3	11.3	46.971	406	0	28.943	767260	6
A0A0U1RQF0	FASN	3	3	3	1.3	1.3	1.3	273.2	2509	0	18.529	319870	4
P62861	FAU	2	2	2	18.6	18.6	18.6	6.6478	59	0	17.908	1140400	3
A0A087X1D8	FDPS	2	2	2	19.5	19.5	19.5	20.033	174	0	15.24	379360	2
Q96AY3	FKBP10	5	5	5	7.6	7.6	7.6	64.244	582	0	29.706	1016800	4
Q02790	FKBP4	4	4	4	9.4	9.4	9.4	51.804	459	0	28.807	1343500	6
A0A087WWY3	FLNA	10	10	10	6.6	6.6	6.6	245.85	2315	0	74.738	1733000	10
P15328	FOLR1	3	3	3	12.8	12.8	12.8	29.819	257	0	18.132	1195200	5
Q16658	FSCN1	2	2	2	5.5	5.5	5.5	54.529	493	0	16.696	501790	3
P02794	FTH1	7	7	7	29.5	29.5	29.5	21.225	183	0	47.713	4395400	12
P11413	G6PD	9	9	9	17.1	17.1	17.1	59.256	515	0	58.06	1942900	9
Q14697	GANAB	16	16	16	16.3	16.3	16.3	106.87	944	0	124.4	9897300	29
P04406	GAPDH	27	27	27	62.4	62.4	62.4	36.053	335	0	323.31	28536000	30
P41250	GARS1	9	9	9	15.7	15.7	15.7	83.165	739	0	92.563	3775400	9
P22102	GART	2	2	2	3	3	3	107.77	1010	0	12.511	222050	3
Q9Y2T3	GDA	9	9	9	28	28	28	51.002	454	0	92.895	8127100	12
P50395	GDI2	3	3	3	9.9	9.9	9.9	50.663	445	0	20.407	892240	3
P63092	GNAS	3	3	3	8.9	8.9	8.9	45.664	394	0	17.88	551270	4
P17174	GOT1	4	4	4	11.1	11.1	11.1	46.247	413	0	22.545	638410	3
P06744	GPI	5	5	5	9.7	9.7	9.7	63.146	558	0	33.381	2815200	7
K7EMR1	GRN	2	2	2	15.1	15.1	15.1	18.07	172	0	12.477	160390	1
P00390	GSR	3	3	3	6.9	6.9	6.9	56.256	522	0	17.641	319260	3
P21266	GSTM3	3	3	3	13.8	13.8	13.8	26.559	225	0	18.34	640740	2
P78417	GSTO1	3	3	3	13.7	13.7	13.7	27.566	241	0	18.005	748740	4
P09211	GSTP1	5	5	5	27.6	27.6	27.6	23.356	210	0	52.433	5102400	5
P10412	H1-4	8	8	6	38.4	38.4	26.9	21.865	219	0	53.304	2228300	10
P16401	H1-5	6	4	4	27.9	16.8	16.8	22.58	226	0	24.586	471020	2
Q99878	H2AC14	3	3	3	29.7	29.7	29.7	13.936	128	0	29.28	2474200	2
Q16778	H2BC21	9	9	9	61.9	61.9	61.9	13.92	126	0	67.172	11296000	16
K7EK07	H3-3B	7	7	7	34.8	34.8	34.8	14.914	132	0	52.133	11347000	10
P62805	H4-16	7	7	7	56.3	56.3	56.3	11.367	103	0	53.914	3362400	13
P51858	HDGF	3	3	3	14.2	14.2	14.2	26.788	240	0	22.091	2033000	5
Q5T7C4	HMGB1	2	2	2	15.8	15.8	15.8	18.311	158	0	13.835	718320	3
Q01581	HMGCS1	2	2	2	6	6	6	57.293	520	0	14.301	75221	1
P22626	HNRNPA2B1	4	4	4	15.9	15.9	15.9	37.429	353	0	26.831	707560	4
G3V576	HNRNPC	4	4	4	18.2	18.2	18.2	25.256	231	0	26.559	797060	4
A0A1W2PP35	HNRNPU	3	3	3	4.7	4.7	4.7	80.648	728	0	21.967	783680	6
P00492	HPRT1	3	3	3	15.1	15.1	15.1	24.579	218	0	20.111	682130	5
Q86YZ3	HRNR	3	3	3	2.8	2.8	2.8	282.39	2850	0	31.31	926010	3
P07900	HSP90AA1	37	24	23	40.6	28.4	27.5	84.659	732	0	204.46	19885000	46
P08238	HSP90AB1	40	40	25	42.8	42.8	28.9	83.263	724	0	323.31	38696000	70
P14625	HSP90B1	33	31	31	34	32.3	32.3	92.468	803	0	221	26218000	54
P0DMV9	HSPA1B	12	9	4	19.3	15.9	5.8	70.051	641	0	69.98	5443300	12
P34932	HSPA4	8	8	7	12.6	12.6	11	94.33	840	0	60.159	2549800	11
E9PDE8	HSPA4L	3	2	2	4.8	3.1	3.1	91.953	813	0	13.041	54778	2
P11021	HSPA5	32	32	31	40.7	40.7	40.7	72.332	654	0	283.93	33530000	51
P11142	HSPA8	25	24	20	40.2	40.2	33.7	70.897	646	0	186.89	22676000	35
P04792	HSPB1	3	3	3	21.5	21.5	21.5	22.782	205	0	23.51	1197600	4
Q92598	HSPH1	4	3	3	5.9	4.3	4.3	96.864	858	0	56.943	955640	3
Q7Z6Z7	HUWE1	3	3	3	1	1	1	481.89	4374	0	18.153	409460	3
A0A087X054	HYOU1	8	8	8	10.7	10.7	10.7	104.78	937	0	64.701	3021300	12
Q14116	IL18	2	2	2	12.4	12.4	12.4	22.326	193	0	16.905	1263300	3
H0Y4R1	IMPDH2	3	3	3	6.8	6.8	6.8	50.957	470	0	18.288	653180	2
O00410	IPO5	2	2	2	2.3	2.3	2.3	123.63	1097	0	12.105	285600	2
P46940	IQGAP1	5	5	5	3	3	3	189.25	1657	0	30.155	818010	4
P05556	ITGB1	3	3	3	3.3	3.3	3.3	88.414	798	0	17.799	451940	2
P52292	KPNA2	3	3	3	8.3	8.3	8.3	57.861	529	0	39.826	950610	4
Q14974	KPNB1	3	3	3	4.6	4.6	4.6	97.169	876	0	20.615	1269600	3
P04264	KRT1	33	33	23	53.3	53.3	42.9	66.038	644	0	323.31	32699000	66
P13645	KRT10	22	22	16	35.4	35.4	31.2	58.826	584	0	275.16	46645000	39
P02533	KRT14	13	8	3	25.4	20.1	10.2	51.561	472	0	75.921	4537200	10
P08779	KRT16	12	4	4	26.8	14.2	14.2	51.267	473	0	25.734	1701500	6
P13647	KRT5	11	7	4	21.9	14.2	8.8	62.378	590	0	63.575	7278700	12
P35527	KRT9	16	15	15	35.5	34.3	34.3	62.064	623	0	194.74	24455000	20
P32004	L1CAM	2	2	2	2.1	2.1	2.1	140	1257	0	11.317	120180	1
P00338	LDHA	28	28	23	47.3	47.3	41.3	36.688	332	0	323.31	53193000	43
P07195	LDHB	23	19	19	42.8	42.8	42.8	36.638	334	0	164.24	27106000	30
G3V3R6	LGALS3	4	4	4	21.5	21.5	21.5	24.086	233	0	27.739	1855800	10
P09960	LTA4H	2	2	2	3.6	3.6	3.6	69.284	611	0	11.952	291170	2
P55145	MANF	2	2	2	12.1	12.1	12.1	20.7	182	0	11.935	567530	1
P27816	MAP4	7	7	7	9.3	9.3	9.3	121	1152	0	47.705	1087700	9
P31153	MAT2A	2	2	2	4.1	4.1	4.1	43.66	395	0	16.147	479170	5
P40925	MDH1	9	9	9	31.1	31.1	31.1	36.426	334	0	61.061	4966500	8
P40926	MDH2	5	5	5	21.6	21.6	21.6	35.503	338	0	39.361	1818200	6
P14174	MIF	2	2	2	17.4	17.4	17.4	12.476	115	0	15.377	636860	4
P26038	MSN	9	9	9	13.5	13.5	13.5	67.819	577	0	57.022	2984800	12
Q9Y6C9	MTCH2	3	3	3	6.9	6.9	6.9	33.331	303	0	18.379	831340	5
Q9NZM1	MYOF	3	3	3	1.9	1.9	1.9	234.71	2061	0	17.401	296370	3
A0A087WUT5	NAPRT	2	2	2	7.8	7.8	7.8	24.476	232	0	12.917	442890	2
Q8NCW5	NAXE	2	2	2	10.4	10.4	10.4	31.674	288	0	17.12	1662600	2
Q6PIU2	NCEH1	3	3	3	9.8	9.8	9.8	45.807	408	0	24.458	886910	4
Q96TA1	NIBAN2	2	2	2	3.4	3.4	3.4	84.137	746	0	13.499	117880	2
P22392	NME2	3	3	3	25.7	25.7	25.7	17.298	152	0	23.166	2345800	9
E9PLK3	NPEPPS	5	5	5	5.4	5.4	5.4	102.99	915	0	36.749	623620	5
P06748	NPM1	2	2	2	10.9	10.9	10.9	32.575	294	0	18.675	814640	2
Q9UKK9	NUDT5	2	2	2	9.1	9.1	9.1	24.327	219	0	11.617	181980	3
P13674	P4HA1	2	2	2	4.7	4.7	4.7	61.049	534	0	13.284	222480	2
P07237	P4HB	17	17	17	28.7	28.7	28.7	57.116	508	0	118.78	12073000	24
A0A087WTT1	PABPC1	3	3	3	7.7	7.7	7.7	58.535	522	0	17.353	509670	4
Q15365	PCBP1	3	3	2	9.8	9.8	6.7	37.497	356	0	17.59	181130	3
P12004	PCNA	4	4	4	19.9	19.9	19.9	28.768	261	0	28.008	888020	3
P30101	PDIA3	27	27	21	49.1	49.1	37.6	56.782	505	0	225.03	19336000	44
P13667	PDIA4	10	10	10	12.9	12.9	12.9	72.932	645	0	67.735	3940500	12
Q15084	PDIA6	11	11	11	28	28	28	48.121	440	0	113.96	7869700	13
O15067	PFAS	10	10	10	9.1	9.1	9.1	144.73	1338	0	72.097	2678900	13
P07737	PFN1	8	8	8	43.6	43.6	43.6	15.054	140	0	82.401	7522700	7
P18669	PGAM1	10	10	10	42.1	42.1	42.1	28.804	254	0	88.944	6288100	16
P00558	PGK1	13	13	13	44.8	44.8	44.8	44.614	417	0	142.22	12822000	23
A6NDG6	PGP	2	2	2	7.5	7.5	7.5	34.006	321	0	12.957	574590	2
O00264	PGRMC1	2	2	2	11.8	11.8	11.8	21.671	195	0	13.56	296080	3
O15173	PGRMC2	2	2	2	14.8	14.8	14.8	23.818	223	0	14.845	76778	2
A0A286YF22	PHGDH	2	2	2	4.6	4.6	4.6	55.938	526	0	11.479	429830	1
P14618	PKM	11	11	11	29	29	29	57.936	531	0	89.316	12275000	18
H7C2V1	PLOD3	2	2	2	8.9	8.9	8.9	31.129	270	0	14.521	266720	4
A0A0A0MSQ0	PLS3	7	7	7	12.5	12.5	12.5	69.334	617	0	46.522	1969900	9
P00491	PNP	2	2	2	11.1	11.1	11.1	32.118	289	0	14.599	253320	3
Q15181	PPA1	5	5	5	20.1	20.1	20.1	32.66	289	0	31.445	1570000	6
P62937	PPIA	9	9	9	57	57	57	18.012	165	0	60.596	3575100	11
P23284	PPIB	9	9	9	47.7	47.7	47.7	23.742	216	0	70.78	3893600	19
P30153	PPP2R1A	4	4	4	8.8	8.8	8.8	65.308	589	0	24.279	1074800	4
A0A0A0MSI0	PRDX1	7	7	5	49.1	49.1	38	18.976	171	0	44.728	5684000	7
Q13162	PRDX4	4	2	2	15.5	8.5	8.5	30.54	271	0	14.226	203040	2
P30041	PRDX6	7	7	7	28.1	28.1	28.1	25.035	224	0	92.68	8342100	9
K7EPW7	PRKCSH	3	3	3	12.5	12.5	12.5	18.958	168	0	22.5	2730000	4
Q9Y617	PSAT1	6	6	6	13.2	13.2	13.2	40.422	370	0	37.38	1648800	6
P25786	PSMA1	4	4	4	17.1	17.1	17.1	29.555	263	0	23.379	779830	5
A0A024RA52	PSMA2	3	3	3	16.7	16.7	16.7	25.898	234	0	24.375	888730	2
P28066	PSMA5	4	4	4	20.3	20.3	20.3	26.411	241	0	24.19	630900	3
G3V3I1	PSMA6	3	3	3	23.6	23.6	23.6	16.645	148	0	25.115	735300	3
O14818	PSMA7	2	2	2	10.5	10.5	10.5	27.887	248	0	13.683	521440	4
P28074	PSMB5	3	3	3	13.7	13.7	13.7	28.48	263	0	20.601	365660	5
P28072	PSMB6	2	2	2	9.2	9.2	9.2	25.357	239	0	13.364	495690	2
P35998	PSMC2	3	3	3	10.4	10.4	10.4	48.633	433	0	17.333	678870	3
Q13200	PSMD2	3	3	3	5.2	5.2	5.2	100.2	908	0	20.583	815020	5
Q15185	PTGES3	2	2	2	10.6	10.6	10.6	18.697	160	0	13.986	101950	1
E7END7	RAB1A	2	2	2	16.2	16.2	16.2	19.018	173	0	13.635	374420	1
P51148	RAB5C	3	3	3	17.6	17.6	17.6	23.482	216	0	19.935	220920	2
P20340	RAB6A	2	2	2	12	12	12	23.593	208	0	12.228	333960	2
C9J4S4	RAB7A	2	2	2	25.5	25.5	25.5	10.961	98	0	33.189	2141600	2
P63000	RAC1	2	2	2	12.5	12.5	12.5	21.45	192	0	12.967	494550	2
P62826	RAN	8	8	8	26.4	26.4	26.4	24.423	216	0	68.834	5201400	10
C9JXG8	RANBP1	2	2	2	12.4	12.4	12.4	16.9	145	0	15.915	503750	1
A6NKB8	RNPEP	2	2	2	3.9	3.9	3.9	68.168	611	0	12.519	470150	2
F8W7C6	RPL10	2	2	2	12.9	12.9	12.9	18.565	163	0	11.371	597030	2
P26373	RPL13	11	11	11	43.1	43.1	43.1	24.261	211	0	88.103	5981500	13
E7EPB3	RPL14	2	2	2	18.5	18.5	18.5	14.558	124	0	12.565	115780	2
F8VUA6	RPL18	5	5	5	46.9	46.9	46.9	14.529	130	0	36.225	1723400	6
J3QR09	RPL19	4	4	4	15.5	15.5	15.5	23.134	193	0	44.569	1156700	4
M0R181	RPL21	5	5	5	30.3	30.3	30.3	14.149	122	0	34.886	2646600	8
K7EMA7	RPL23A	4	4	4	41.4	41.4	41.4	7.9232	70	0	24.965	1990600	5
C9JXB8	RPL24	2	2	2	18.2	18.2	18.2	14.369	121	0	14.148	699740	4
J3QRI7	RPL26	7	7	7	54.2	54.2	54.2	12.63	107	0	50.553	5191300	11
P61353	RPL27	3	3	3	32.4	32.4	32.4	15.798	136	0	19.899	1152400	6
P46776	RPL27A	5	5	5	23.6	23.6	23.6	16.561	148	0	36.939	6267800	16
P46779	RPL28	8	8	8	41.6	41.6	41.6	15.747	137	0	53.549	3412700	10
P47914	RPL29	5	5	5	25.2	25.2	25.2	17.752	159	0	38.62	6880000	6
P39023	RPL3	2	2	2	5	5	5	46.108	403	0	17.411	390840	2
B8ZZK4	RPL31	5	5	5	46.8	46.8	46.8	8.9876	79	0	31.972	5154800	5
D3YTB1	RPL32	2	2	2	17.3	17.3	17.3	15.616	133	0	13.901	2834800	3
P42766	RPL35	5	5	5	27.6	27.6	27.6	14.551	123	0	35.111	1507900	11
P36578	RPL4	7	7	7	18.7	18.7	18.7	47.697	427	0	53.449	2906100	10
P46777	RPL5	3	3	3	10.8	10.8	10.8	34.362	297	0	19.5	376440	2
Q02878	RPL6	11	11	11	30.2	30.2	30.2	32.728	288	0	73.401	2913000	14
A8MUD9	RPL7	3	3	3	13	13	13	24.433	208	0	18.079	968610	3
P62424	RPL7A	6	6	6	21.4	21.4	21.4	29.995	266	0	38.391	1681300	6
P62917	RPL8	6	6	6	19.5	19.5	19.5	28.024	257	0	46.327	2159300	9
B7Z4L4	RPN1	2	2	2	7.8	7.8	7.8	49.921	435	0	15.645	496400	4
M0QZC5	RPS11	2	2	2	19.5	19.5	19.5	13.997	118	0	13.221	420180	3
A0A2R8Y811	RPS14	5	5	5	20	20	20	16.159	150	0	32.64	1612000	4
I3L404	RPS2	2	2	2	13.5	13.5	13.5	16.565	155	0	12.157	539430	2
P60866	RPS20	4	4	4	34.5	34.5	34.5	13.373	119	0	29.549	1635800	6
P62266	RPS23	2	2	2	15.4	15.4	15.4	15.807	143	0	12.251	417250	2
Q5JNZ5	RPS26P11	2	2	2	20.9	20.9	20.9	13.002	115	0	11.918	968560	1
Q71UM5	RPS27L	2	2	2	25	25	25	9.4771	84	0	11.189	384690	1
F2Z2S8	RPS3	3	3	3	30.8	30.8	30.8	13.069	117	0	18.545	261050	3
P62701	RPS4X	3	3	3	9.9	9.9	9.9	29.597	263	0	23.9	532690	4
A0A2R8Y623	RPS7	2	2	2	10.1	10.1	10.1	19.405	169	0	11.638	145590	1
Q5JR95	RPS8	4	4	4	26.6	26.6	26.6	21.879	188	0	36.676	1003300	5
B5MCT8	RPS9	2	2	2	11.5	11.5	11.5	16.628	139	0	11.739	139510	1
C9J9K3	RPSA	3	3	3	19.4	19.4	19.4	29.404	263	0	30.164	1944800	3
O14828	SCAMP3	3	3	3	9.8	9.8	9.8	38.287	347	0	23.383	851230	5
Q8NBX0	SCCPDH	3	3	3	9.3	9.3	9.3	47.151	429	0	20.076	1382500	5
P35237	SERPINB6	2	2	2	7.2	7.2	7.2	42.621	376	0	12.436	646420	2
P50454	SERPINH1	5	5	5	14.1	14.1	14.1	46.44	418	0	37.097	5561200	6
Q01105	SET	3	3	3	9	9	9	33.488	290	0	22.396	1832600	5
P31947	SFN	3	2	2	11.7	8.5	8.5	27.774	248	0	14.243	2849900	2
P23246	SFPQ	2	2	2	3.8	3.8	3.8	76.149	707	0	11.91	209780	2
Q9H9B4	SFXN1	8	8	8	26.7	26.7	26.7	35.619	322	0	56.301	2293200	11
I3L1P8	SLC25A11	2	2	2	10.8	10.8	10.8	32.182	296	0	17.188	258220	1
Q00325	SLC25A3	10	10	10	24	24	24	40.094	362	0	71.834	4659600	10
P05141	SLC25A5	14	14	6	39.3	39.3	19.5	32.852	298	0	128.44	16305000	19
P12236	SLC25A6	10	2	2	29.2	9.4	9.4	32.866	298	0	11.603	331260	1
F5GZS6	SLC3A2	9	9	9	15	15	15	64.872	599	0	71.502	4856400	11
Q01650	SLC7A5	3	3	3	6.7	6.7	6.7	55.01	507	0	24.768	825620	4
P08621	SNRNP70	2	2	2	4.3	4.3	4.3	51.556	437	0	11.28	233330	3
P00441	SOD1	4	4	4	30.5	30.5	30.5	15.936	154	0	34.384	1751100	6
P19623	SRM	4	4	4	14.6	14.6	14.6	33.824	302	0	25.992	838690	5
P31948	STIP1	3	3	3	7.4	7.4	7.4	62.639	543	0	20.22	862800	3
A2A2D0	STMN1	2	2	2	30.6	30.6	30.6	9.7931	85	0	15.268	932560	5
P27105	STOM	3	3	3	13.5	13.5	13.5	31.73	288	0	19.442	1316400	5
E9PBT8	SUMF2	2	2	2	11.2	11.2	11.2	25.829	232	0	12.004	209400	1
P37802	TAGLN2	5	5	5	28.6	28.6	28.6	22.391	199	0	36.039	4476900	8
P37837	TALDO1	4	4	4	13.4	13.4	13.4	37.54	337	0	26.029	696510	6
P26639	TARS1	11	11	11	17.4	17.4	17.4	83.434	723	0	73.118	6494000	14
P02786	TFRC	7	7	7	10.8	10.8	10.8	84.87	760	0	79.929	3712100	10
P29401	TKT	18	18	18	29.1	29.1	29.1	67.877	623	0	127.13	6958700	24
Q9BVC6	TMEM109	2	2	2	9.1	9.1	9.1	26.21	243	0	12.394	319240	1
P60174	TPI1	19	19	19	71	71	71	30.791	286	0	183.28	19561000	21
P68363	TUBA1B	10	10	5	27.7	27.7	12	50.151	451	0	87.217	9801800	14
Q5JP53	TUBB	12	3	2	32.4	10.8	7.3	47.766	426	0	25.924	6040300	7
P68371	TUBB4B	13	13	3	31	31	7	49.83	445	0	98.787	6781500	26
Q12792	TWF1	2	2	2	7.1	7.1	7.1	40.282	350	0	13.73	300930	2
Q8NBS9	TXNDC5	2	2	2	8.6	8.6	8.6	47.628	432	0	13.291	270400	1
E9PKD3	TXNRD1	2	2	2	14.3	14.3	14.3	19.393	175	0	13.048	806800	4
Q16222	UAP1	2	2	2	4.4	4.4	4.4	58.768	522	0	12.337	266990	2
P22314	UBA1	15	15	15	16.6	16.6	16.6	117.85	1058	0	143.05	14737000	16
K7EPL2	UBA2	2	2	2	8.8	8.8	8.8	29.385	262	0	12.135	217350	1
J3QS39	UBB	6	6	6	65.6	65.6	65.6	10.469	93	0	64.023	5928900	10
O60701	UGDH	5	5	5	12.3	12.3	12.3	55.023	494	0	31.637	927120	8
Q9NYU2	UGGT1	2	2	2	1.7	1.7	1.7	177.19	1555	0	14.473	360050	3
A0A087WYS1	UGP2	3	3	3	6.9	6.9	6.9	56.967	508	0	19.088	441230	4
Q99536	VAT1	7	7	7	23.2	23.2	23.2	41.92	393	0	64.355	2234200	9
P18206	VCL	8	8	8	9	9	9	123.8	1134	0	53.753	1392700	11
P55072	VCP	12	12	12	14.4	14.4	14.4	89.321	806	0	87.929	4324400	15
C9JI87	VDAC1	2	2	2	13.7	13.7	13.7	20.274	183	0	12.513	139820	2
A0A0A0MR02	VDAC2	2	2	2	7.8	7.8	7.8	30.348	282	0	12.769	529490	2
P23381	WARS1	4	4	4	9.8	9.8	9.8	53.165	471	0	27.614	613040	4
D6RD66	WDR1	2	2	2	10.6	10.6	10.6	26.797	245	0	11.816	203830	2
Q5T6H7	XPNPEP1	2	2	2	4.5	4.5	4.5	62.138	552	0	11.52	928540	1
P31946	YWHAB	9	5	4	36.6	26.8	20.3	28.082	246	0	42.498	2238000	6
P62258	YWHAE	6	5	5	21.6	21.6	21.6	29.174	255	0	36.607	1261300	7
P61981	YWHAG	9	5	5	27.5	15	15	28.302	247	0	38.425	1386800	5
P27348	YWHAQ	7	5	5	22	15.1	15.1	27.764	245	0	39.497	763180	4
A0A0A0MS41	YWHAZ	13	13	9	45.3	45.3	38.8	27.745	245	0	92.126	5217300	15
A0A0A0MS41		5	5	5	20.2	20.2	20.2	35.503	321	0	29.589	921350	6

## Sheet: RNase A-3
Majority protein IDs	Protein Name	Peptides	Razor + unique peptides	Unique peptides	Sequence coverage [%]	Unique + razor sequence coverage [%]	Unique sequence coverage [%]	Mol. weight [kDa]	Sequence length	Q-value	Score	Intensity	MS/MS count
P02533	KRT14	7	5	2	16.1	12.3	4.9	51.561	472	0	51.793	2046300	9
P06748	NPM1	2	2	2	10.9	10.9	10.9	32.575	294	0	12.007	124680	2
P08779	KRT16	7	2	2	16.7	5.5	5.5	51.267	473	0	20.636	285750	2
P10696	ALPG	2	2	2	5.1	5.1	5.1	57.376	532	0	36.671	812910	3
P12004	PCNA	2	2	2	8	8	8	28.768	261	0	12.405	141130	1
P13639	EEF2	2	2	2	1.7	1.7	1.7	95.337	858	0	13.075	159330	2
P17174	GOT1	2	2	2	5.6	5.6	5.6	46.247	413	0	12.304	90932	2
P23284	PPIB	2	2	2	10.2	10.2	10.2	23.742	216	0	16.538	425410	4
P61981	YWHAG	4	3	2	17.8	14.6	8.1	28.302	247	0	18.142	810640	3
P62258	YWHAE	3	2	2	12.2	9	9	29.174	255	0	20.896	153070	1
P62805	H4-16	2	2	2	24.3	24.3	24.3	11.367	103	0	11.884	379210	4
P62937	PPIA	2	2	2	15.2	15.2	15.2	18.012	165	0	15.192	435890	3
P68371	TUBB4B	4	3	2	11.7	9.4	6.1	49.83	445	0	21.58	422340	3
Q02878	RPL6	2	2	2	6.6	6.6	6.6	32.728	288	0	12.069	288950	2
A0A087WTS8	HSPA4	2	2	2	5.7	5.7	5.7	52.599	475	0	11.889	68779	2
A0A087WVQ9	EEF1A1	2	2	2	7.9	7.9	7.9	47.883	441	0	21.017	2186000	4
A0A0A0MSI0	PRDX1	4	4	2	23.4	23.4	12.3	18.976	171	0	28.402	294750	2
A0A0C4DFV9	SET	2	2	2	7.5	7.5	7.5	31.124	266	0	12.616	511560	4
A0A1W2PQM2	TUBA1C	2	2	2	7.7	7.7	7.7	36.651	325	0	15.86	701810	3
D6RAE9	SFXN1	2	2	2	48.2	48.2	48.2	6.5954	56	0	12.498	199830	3
D6RFG5	ANXA3	2	2	2	20.8	20.8	20.8	17.145	154	0	13.373	171890	2
E9PJ21	HYOU1	2	2	2	3	3	3	72.976	656	0	13.365	172630	3
E9PJD9	RPL27A	2	2	2	14.3	14.3	14.3	10.127	91	0	24.778	1088800	5
F5H867	SLC3A2	2	2	2	11.1	11.1	11.1	14.757	135	0	12.796	186680	2
F8VUA6	RPL18	2	2	2	18.5	18.5	18.5	14.529	130	0	23.863	278150	3
G3V0E5	TFRC	2	2	2	3.5	3.5	3.5	75.963	679	0	13.179	417140	3
H0YA55	ALB	6	2	2	10.4	4	4	51.459	454	0	11.714	166290	2
H0YMD9	ANXA2	2	2	2	35.4	35.4	35.4	7.0798	65	0	40.601	393700	3
H3BU31	RPL4	2	2	2	12.9	12.9	12.9	18.966	171	0	12.994	210420	2
H7C144	ACTN4	2	2	2	7	7	7	39.001	342	0	11.621	120910	2
J3QR09	RPL19	2	2	2	5.2	5.2	5.2	23.134	193	0	13.487	380840	3
K7EJB9	CALR	2	2	2	12.6	12.6	12.6	28.431	247	0	18.483	633080	2
[truncated: 44 more rows]

## Sheet: NP-1
Majority protein IDs	Protein Name	Number of proteins	Peptides	Razor + unique peptides	Unique peptides	Sequence coverage [%]	Unique + razor sequence coverage [%]	Unique sequence coverage [%]	Mol. weight [kDa]	Sequence length	Q-value	Score	Intensity	MS/MS count
[truncated: 24 more rows]

[truncated: 2 more sheets: NP-2, NP-3]
