# Supplementary material for: Long noncoding RNA HOTAIR interacts with Y-Box Protein-1 (YBX1) to regulate cell proliferation
Source: Life Sci Alliance. 2021 Jul 15;4(9):e202101139. doi: 10.26508/lsa.202101139 (PMC8321693; doi:10.26508/lsa.202101139)
Supplement: Supplementary file 3 [file LSA-2021-01139_TableS3.xls]

## Sheet: Sheet1
Table S3 GO terms enriched in the identified HOTAIR Binding partners
Category	Term		Count	%	P Value	Genes
GOTERM_CC_DIRECT	GO:00005737	cytoplasm	7641/16364	0.466	1.8715e-28	CARS RPL5 HDDC2 CDD RPL30 PITPNB PITPNA PEBP1 PLOD3 PLOD2 PARK7 PLOD1 COMT TCTP IPO7 PSMD8 GPDM IPO9 RPL18A SNRPD1 BASP1 FTH1 ARHGDIA VPS35 RAB2A TPD52 RPS9 TPM3 ACTN1 FBXO2 6PGL P3H1 CNPY2 ACSL3 CNPY3 ILF2 SND1 6PGD ACLY ILF3 TMX3 CDC37 HMBS PSME1 CMPK1 VDAC1 EZR ALDH7A1 RPL28 TSTA3 ANP32A RPN2 UBA6 ARL3 UBA5 EIF5A2 RPN1 NDRG1 RTN4 SULT1A1 PRDX2 PRDX5 ATRAP PODXL PRDX1 SBP1 G3BP1 COX2 DIC XRCC6 …
GOTERM_CC_DIRECT	GO:00044424	intracellular part	10944/16364	0.668	1.2443e-22	RPL5 CDD RPL30 PITPNB PITPNA PPP2R2A PSMD8 PSMD7 RPL18A PSMD5 SNRPD1 FTH1 PSMD3 VPS35 ACTN1 FBXO2 P3H1 ACSL3 SND1 CDC37 SARNP HMBS PSME1 PSME2 VDAC1 EZR ALDH7A1 RPL28 TSTA3 ANP32A RPN2 EIF5A2 RPN1 SULT1A1 PRDX2 PRDX5 PRDX1 SBP1 COX2 DIC BTF3 XRCC6 PA2G4 FPPS ADHX RPL27A CALU HNRNPD RPS21 ARF1 ACY1 HEXB HEXA ADK XPO2 ANXA6 DHX15 ANXA7 TSPO TMED7 TCPZ DFFA TMED9 PARP1 SYK ANXA3 NSUN2 PTGR1 UCHL3 RH…
GOTERM_CC_DIRECT	GO:00005622	intracellular	11298/16364	0.69	5.3982e-22	RPL5 CDD RPL30 PITPNB PITPNA PPP2R2A PSMD8 PSMD7 RPL18A PSMD5 SNRPD1 FTH1 PSMD3 VPS35 ACTN1 FBXO2 P3H1 ACSL3 SND1 CDC37 SARNP HMBS PSME1 PSME2 VDAC1 EZR ALDH7A1 RPL28 TSTA3 ANP32A RPN2 EIF5A2 RPN1 GSPT1 SULT1A1 PRDX2 PRDX5 PRDX1 SBP1 COX2 DIC BTF3 XRCC6 PA2G4 FPPS ADHX RPL27A CALU HNRNPD RPS21 ARF1 ACY1 HEXB HEXA ADK XPO2 ANXA6 DHX15 ANXA7 TSPO TMED7 TCPZ DFFA TMED9 PARP1 SYK ANXA3 NSUN2 PTGR1 UC…
GOTERM_CC_DIRECT	GO:00044444	cytoplasmic part	5147/16364	0.314	1.0795e-19	CARS RPL5 HDDC2 CDD RPL30 PITPNB PEBP1 PLOD3 PLOD2 PARK7 PLOD1 COMT TCTP GPDM RPL18A SNRPD1 FTH1 ARHGDIA VPS35 RAB2A TPD52 RPS9 TPM3 ACTN1 FBXO2 P3H1 CNPY2 ACSL3 CNPY3 SND1 ACLY ILF3 TMX3 HMBS VDAC1 EZR ALDH7A1 RPL28 ANP32A RPN2 ARL3 EIF5A2 RPN1 RTN4 PRDX2 PRDX5 ATRAP PRDX1 SBP1 G3BP1 COX2 DIC PGES2 FPPS ADHX P4HA2 RPL27A CALU HNRNPD CDK1 UBE2N CYCS SRPRB RPS21 EIF4G1 ARF1 YWHAD ACY1 HEXB HEXA AD…
GOTERM_CC_DIRECT	GO:00005829	cytosol	1315/16364	0.08	3.3369e-15	CARS RPL5 CDD RPL30 ARF1 ACY1 ADK PARK7 COMT HEBP1 RPL18A SNRPD1 FTH1 ARHGDIA ANXA7 PGM2 VPS35 TCPZ PGM1 DFFA RPS9 GPX1 ACTN1 FBXO2 AHSA1 NME1 ACLY BLVRB MVD EZR ALDH7A1 RPL28 PDXK EIF5A2 GNAI2 CDC42 PRDX5 G3BP1 HARS RPL18 PAK2 EIF4B PGES2 RAB14 IMPDH1 RPL27A EIF3J HNRNPD CDK1 UBE2N CYCS BACH RPS21 EIF4G1 EIF3B
GOTERM_BP_DIRECT	GO:00008152	metabolic process	5950/14293	0.416	2.4429e-13	CARS RPL5 CDD RPL30 PITPNB PITPNA PLOD3 PPP2R2A PLOD2 PARK7 PLOD1 COMT PSMD8 PSMD7 GPDM RPL18A APMAP PSMD5 SNRPD1 PPME1 FTH1 PSMD3 PSPH RPS9 SNRPN FBXO2 6PGL P3H1 ACSL3 6PGD ACLY HMBS PSME1 CMPK1 PSME2 ALDH7A1 RPL28 FTO TSTA3 RPN2 PSMD13 UBA6 UBA5 EIF5A2 RPN1 GSPT1 SULT1A1 PRDX2 PRDX5 PRDX1 PNPO COX2 DIC BTF3 XRCC6 UBE2I PGES2 PA2G4 TBCA FPPS ADHX PAICS CDK6 NASP LA P4HA2 RPL27A HNRNPD CDK1 UBE2N…
GOTERM_BP_DIRECT	GO:00009987	cellular process	9360/14293	0.654	2.8778e-12	CARS RPL5 CDD RPL30 PEBP1 PLOD3 PPP2R2A PLOD2 PARK7 PLOD1 COMT TCTP IPO7 PSMD8 PSMD7 GPDM IPO9 RPL18A PSMD5 SNRPD1 BASP1 PPME1 FTH1 ARHGDIA PSMD3 VPS35 PSPH RAB2A TPD52 RPS9 SNRPN TPM3 ACTN1 FBXO2 6PGL ACSL3 SND1 6PGD ACLY ILF3 TMX3 CDC37 HMBS PSME1 CMPK1 PSME2 VDAC1 EZR ALDH7A1 RPL28 FTO TSTA3 ANP32A RPN2 PSMD13 UBA6 ARL3 UBA5 EIF5A2 RPN1 NDRG1 GSPT1 RTN4 SULT1A1 PRDX2 PRDX5 PODXL PRDX1 PNPO COX…
GOTERM_CC_DIRECT	GO:00022624	proteasome accessory complex	11/16364	0	1.8113e-11	PSMD8 PSMD7 RPN2 PSMD13 RPN1 PSME1 PSME2
GOTERM_BP_DIRECT	GO:00044238	primary metabolic process	5281/14293	0.369	3.1824e-11	CARS RPL5 CDD RPL30 PITPNB PITPNA PLOD3 PPP2R2A PLOD2 PLOD1 COMT PSMD8 PSMD7 GPDM RPL18A PSMD5 SNRPD1 PPME1 PSMD3 PSPH RPS9 SNRPN FBXO2 6PGL ACSL3 6PGD ACLY HMBS PSME1 CMPK1 PSME2 RPL28 FTO TSTA3 RPN2 PSMD13 UBA6 UBA5 EIF5A2 RPN1 GSPT1 SULT1A1 PRDX2 COX2 DIC BTF3 XRCC6 UBE2I PGES2 PA2G4 TBCA FPPS ADHX PAICS CDK6 NASP LA P4HA2 RPL27A HNRNPD CDK1 UBE2N CYCS SAE1 RPS21 SAE2 UBE2K EIF4G1 ACY1 ADPGK H…
GOTERM_BP_DIRECT	GO:00051443	positive regulation of ubiquitin-protein ligase activity	70/14293	0.004	3.5219e-10	PSMD8 PSMD7 RPN2 PSMD5 PSMB3 PSMD13 PSMD3 RPN1 PSME1 CDK1 UBE2N PSME2
GOTERM_BP_DIRECT	GO:00051351	positive regulation of ligase activity	73/14293	0.005	5.857e-10	PSMD8 PSMD7 RPN2 PSMD5 PSMB3 PSMD13 PSMD3 RPN1 PSME1 CDK1 UBE2N PSME2
GOTERM_MF_DIRECT	GO:00005488	binding	12354/15430	0.8	8.4816e-10	RPL5 CDD RPL30 PITPNB PITPNA PPP2R2A PSMD8 PSMD7 RPL18A PSMD5 SNRPD1 FTH1 PSMD3 VPS35 ACTN1 FBXO2 P3H1 ACSL3 SND1 CDC37 SARNP HMBS VDAC1 EZR RPL28 TSTA3 ANP32A RPN2 EIF5A2 RPN1 GSPT1 PRDX2 PRDX1 SBP1 PNPO COX2 DIC BTF3 XRCC6 PA2G4 FPPS ADHX PAICS RPL27A CALU HNRNPD RPS21 ARF1 ACY1 HEXB HEXA ADK XPO2 ANXA6 DHX15 ANXA7 TSPO TCPZ DFFA PARP1 SYK ANXA3 NSUN2 PTGR1 UCHL3 RHOA NME1 PLIN3 STRAP ALDOC THI…
GOTERM_BP_DIRECT	GO:00031145	anaphase-promoting complex-dependent proteasomal ubiquitin-dependent protein catabolic process	63/14293	0.004	1.5903e-09	PSMD8 PSMD7 RPN2 PSMD5 PSMB3 PSMD13 PSMD3 RPN1 PSME1 CDK1 PSME2
GOTERM_BP_DIRECT	GO:00051437	positive regulation of ubiquitin-protein ligase activity involved in mitotic cell cycle	64/14293	0.004	1.896e-09	PSMD8 PSMD7 RPN2 PSMD5 PSMB3 PSMD13 PSMD3 RPN1 PSME1 CDK1 PSME2
GOTERM_BP_DIRECT	GO:00051438	regulation of ubiquitin-protein ligase activity	81/14293	0.005	2.0337e-09	PSMD8 PSMD7 RPN2 PSMD5 PSMB3 PSMD13 PSMD3 RPN1 PSME1 CDK1 UBE2N PSME2
GOTERM_BP_DIRECT	GO:00044281	small molecule metabolic process	1370/14293	0.095	2.3477e-09	CARS CDD ACY1 ADPGK HEXB ADK PLOD1 COMT GPDM PPME1 PGM2 PSPH PGM1 GPX1 SYK NSUN2 6PGL ACSL3 PTGR1 6PGD NME1 ACLY CMPK1 ALDOC MVD UMPS THIO FTO TSTA3 PDXK EIF5A2 GSPT1 TYMP SULT1A1 PNPO COX2 HARS DIC PGES2 GSS ALDR SAHH FPPS ADHX PAICS P4HA2 IMPDH1 BACH GALM
GOTERM_BP_DIRECT	GO:00051340	regulation of ligase activity	84/14293	0.005	3.1268e-09	PSMD8 PSMD7 RPN2 PSMD5 PSMB3 PSMD13 PSMD3 RPN1 PSME1 CDK1 UBE2N PSME2
GOTERM_BP_DIRECT	GO:00051439	regulation of ubiquitin-protein ligase activity involved in mitotic cell cycle	68/14293	0.004	3.7143e-09	PSMD8 PSMD7 RPN2 PSMD5 PSMB3 PSMD13 PSMD3 RPN1 PSME1 CDK1 PSME2
GOTERM_MF_DIRECT	GO:00003824	catalytic activity	5094/15430	0.33	4.4829e-09	CARS HDDC2 CDD PLOD3 PPP2R2A PLOD2 PARK7 PLOD1 COMT GPDM APMAP PPME1 FTH1 PSPH RAB2A FBXO2 6PGL P3H1 ACSL3 ILF2 SND1 6PGD ACLY TMX3 HMBS CMPK1 ALDH7A1 FTO TSTA3 RPN2 UBA6 UBA5 RPN1 GSPT1 SULT1A1 PRDX2 PRDX5 PRDX1 G3BP1 PNPO COX2 MOT1 XRCC6 UBE2I PGES2 FPPS ADHX PAICS CDK6 P4HA2 CDK1 UBE2N SAE1 SAE2 UBE2K ARF1 ACY1 ADPGK HEXB HEXA ADK DHX15 PGM2 PGM1 DFFA GPX1 PARP1 SYK FBX22 NSUN2 PTGR1 UCHL3 RHO…
GOTERM_CC_DIRECT	GO:00000502	proteasome complex	60/16364	0.003	4.8318e-09	PSMD8 PSMD7 RPN2 PSMD5 PSMB3 PSMD13 PSMD3 RPN1 PSME1 PSME2
GOTERM_BP_DIRECT	GO:00044248	cellular catabolic process	776/14293	0.054	8.1848e-09	CDD RPN2 PSMD13 UBA6 HEXB RPN1 COMT GSPT1 PSMD8 PRDX2 PSMD7 PSMD5 PSMB3 PRDX1 PSMD3 DCPS DFFA UBE2I GPX1 FBX22 FBXO2 UCHL3 ADHX ACLY PSME1 HNRNPD CDK1 UBE2N PSME2 CYCS BLVRB BACH THIO UBE2K
GOTERM_BP_DIRECT	GO:00031398	positive regulation of protein ubiquitination	95/14293	0.006	1.3139e-08	PSMD8 PSMD7 RPN2 PSMD5 PSMB3 PSMD13 PSMD3 RPN1 PSME1 CDK1 UBE2N PSME2
GOTERM_CC_DIRECT	GO:00005838	proteasome regulatory particle	8/16364	0	1.9342e-08	PSMD8 PSMD7 RPN2 PSMD13 RPN1
GOTERM_BP_DIRECT	GO:00051436	negative regulation of ubiquitin-protein ligase activity involved in mitotic cell cycle	62/14293	0.004	1.998e-08	PSMD8 PSMD7 RPN2 PSMD5 PSMB3 PSMD13 PSMD3 RPN1 PSME1 PSME2
GOTERM_CC_DIRECT	GO:00043229	intracellular organelle	9315/16364	0.569	2.0887e-08	RPL5 HDDC2 RPL30 PITPNB PITPNA PEBP1 PLOD3 PLOD2 PARK7 PLOD1 COMT TCTP IPO7 PSMD8 GPDM IPO9 RPL18A SNRPD1 BASP1 FTH1 ARHGDIA VPS35 RAB2A TPD52 RPS9 SNRPN TPM3 ACTN1 FBXO2 P3H1 CNPY2 ACSL3 CNPY3 ILF2 SND1 ILF3 TMX3 SARNP HMBS CMPK1 VDAC1 EZR ALDH7A1 RPL28 FTO ANP32A RPN2 ARL3 UBA5 EIF5A2 RPN1 NDRG1 RTN4 PRDX2 PRDX5 ATRAP PRDX1 SBP1 G3BP1 COX2 MOT1 DIC BTF3 XRCC6 UBE2I CBX3 PGES2 PA2G4 TBCA FPPS AD…
GOTERM_CC_DIRECT	GO:00043226	organelle	9329/16364	0.57	2.4005e-08	RPL5 HDDC2 RPL30 PITPNB PITPNA PEBP1 PLOD3 PLOD2 PARK7 PLOD1 COMT TCTP IPO7 PSMD8 GPDM IPO9 RPL18A SNRPD1 BASP1 FTH1 ARHGDIA VPS35 RAB2A TPD52 RPS9 SNRPN TPM3 ACTN1 FBXO2 P3H1 CNPY2 ACSL3 CNPY3 ILF2 SND1 ILF3 TMX3 SARNP HMBS CMPK1 VDAC1 EZR ALDH7A1 RPL28 FTO ANP32A RPN2 ARL3 UBA5 EIF5A2 RPN1 NDRG1 RTN4 PRDX2 PRDX5 ATRAP PRDX1 SBP1 G3BP1 COX2 MOT1 DIC BTF3 XRCC6 UBE2I CBX3 PGES2 PA2G4 TBCA FPPS AD…
GOTERM_CC_DIRECT	GO:00043231	intracellular membrane-bounded organelle	8340/16364	0.509	2.5773e-08	RPL5 HDDC2 PITPNB PITPNA PEBP1 PLOD3 PLOD2 PARK7 PLOD1 COMT TCTP IPO7 PSMD8 GPDM IPO9 SNRPD1 BASP1 FTH1 VPS35 RAB2A TPD52 RPS9 SNRPN ACTN1 FBXO2 P3H1 CNPY2 ACSL3 CNPY3 ILF2 SND1 ILF3 TMX3 SARNP HMBS CMPK1 VDAC1 ALDH7A1 FTO ANP32A RPN2 ARL3 UBA5 EIF5A2 RPN1 NDRG1 RTN4 PRDX2 PRDX5 ATRAP PRDX1 SBP1 G3BP1 COX2 MOT1 DIC BTF3 XRCC6 UBE2I CBX3 PGES2 PA2G4 FPPS ADHX CDK6 NASP LA P4HA2 CALU HNRNPD CDK1 UB…
GOTERM_CC_DIRECT	GO:00043227	membrane-bounded organelle	8347/16364	0.51	2.7632e-08	RPL5 HDDC2 PITPNB PITPNA PEBP1 PLOD3 PLOD2 PARK7 PLOD1 COMT TCTP IPO7 PSMD8 GPDM IPO9 SNRPD1 BASP1 FTH1 VPS35 RAB2A TPD52 RPS9 SNRPN ACTN1 FBXO2 P3H1 CNPY2 ACSL3 CNPY3 ILF2 SND1 ILF3 TMX3 SARNP HMBS CMPK1 VDAC1 ALDH7A1 FTO ANP32A RPN2 ARL3 UBA5 EIF5A2 RPN1 NDRG1 RTN4 PRDX2 PRDX5 ATRAP PRDX1 SBP1 G3BP1 COX2 MOT1 DIC BTF3 XRCC6 UBE2I CBX3 PGES2 PA2G4 FPPS ADHX CDK6 NASP LA P4HA2 CALU HNRNPD CDK1 UB…
GOTERM_CC_DIRECT	GO:00032991	macromolecular complex	3157/16364	0.192	2.9533e-08	RPL5 RPL30 YWHAD PPP2R2A YBX1 IPO7 PSMD8 PTBP1 RO60 PSMD7 GPDM RPL18A PSMD5 SNRPD1 FTH1 PSMD3 ANXA6 DHX15 TCPZ RPS9 SNRPN PARP1 SYK TPM3 FBXO2 ILF2 SND1 DDOST NME1 TAPBP ACLY ILF3 PSME1 PSME2 STRAP VDAC1 EZR RPL28 CD44 PUR1 RPN2 LRP1 PSMD13 EIF5A2 RPN1 CAPG RTN4 PPM1G CAND1 RBBP4 PSMB3 COX2 RBBP7 RPL18 HNRNPA1 EIF4B XRCC6 ALDR NAP1L1 TOM40 PA2G4 TBCA CDK6 LA RPL27A EIF3J HNRNPD CDK1 UBE2N CYCS SR…
GOTERM_CC_DIRECT	GO:00048770	pigment granule	92/16364	0.005	2.9996e-08	RAB2A YWHAD PRDX1 RPN1 CALU ANXA6 SAHH CAPG NAP1L1 SND1 RAB7A
GOTERM_CC_DIRECT	GO:00042470	melanosome	92/16364	0.005	2.9996e-08	RAB2A YWHAD PRDX1 RPN1 CALU ANXA6 SAHH CAPG NAP1L1 SND1 RAB7A
GOTERM_BP_DIRECT	GO:00051352	negative regulation of ligase activity	66/14293	0.004	3.7262e-08	PSMD8 PSMD7 RPN2 PSMD5 PSMB3 PSMD13 PSMD3 RPN1 PSME1 PSME2
GOTERM_BP_DIRECT	GO:00051444	negative regulation of ubiquitin-protein ligase activity	66/14293	0.004	3.7262e-08	PSMD8 PSMD7 RPN2 PSMD5 PSMB3 PSMD13 PSMD3 RPN1 PSME1 PSME2
GOTERM_BP_DIRECT	GO:00009056	catabolic process	1006/14293	0.07	5.2487e-08	CDD RPN2 PSMD13 UBA6 ADPGK HEXB RPN1 COMT GSPT1 PSMD8 PRDX2 PSMD7 PSMD5 PSMB3 PRDX1 PSMD3 DCPS DFFA UBE2I GPX1 FBX22 FBXO2 6PGL UCHL3 ADHX 6PGD ACLY PSME1 HNRNPD CDK1 UBE2N PSME2 CYCS BLVRB ALDOC BACH THIO UBE2K
GOTERM_MF_DIRECT	GO:00016491	oxidoreductase activity	685/15430	0.044	5.4128e-08	FTO TSTA3 UBA5 PLOD3 PLOD2 PARK7 PLOD1 COX5B COX5A PRDX2 PRDX5 GPDM FTH1 PRDX1 PNPO COX2 NQO1 NQO2 GPX1 PGES2 TXNL1 P3H1 PTGR1 ADHX 6PGD P4HA2 IMPDH1 BLVRB ALDH7A1
GOTERM_BP_DIRECT	GO:00044260	cellular macromolecule metabolic process	3501/14293	0.244	6.9909e-08	CARS RPL5 RPL30 HEXB PLOD3 PPP2R2A PLOD2 PLOD1 YBX1 PSMD8 PTBP1 RO60 PSMD7 RPL18A PSMD5 SNRPD1 PPME1 PSMD3 DHX15 TCPZ DFFA RPS9 SNRPN GPX1 PARP1 SYK FBX22 FBXO2 NSUN2 AHSA1 UCHL3 DDOST TSN HMBS PSME1 PSME2 STRAP RPL28 FTO PUR1 RPN2 LRP1 PSMD13 UBA6 UBA5 EIF5A2 RPN1 GSPT1 GNAI2 TYMP PPM1G PRDX2 CAND1 RBBP4 PSMB3 HARS RBBP7 RPL18 HNRNPA1 DCPS PAK2 EIF4B BTF3 XRCC6 UBE2I NAP1L1 PA2G4 TBCA ADHX CDK6 …
GOTERM_BP_DIRECT	GO:00044249	cellular biosynthetic process	1686/14293	0.117	1.0067e-07	CARS RPL5 CDD RPL30 HEXB ADK PLOD1 YBX1 RO60 RPL18A TSPO PSPH RPS9 PARP1 SYK ACSL3 6PGD DDOST NME1 HMBS CMPK1 MVD UMPS RPL28 TSTA3 PUR1 PDXK RPN2 EIF5A2 RPN1 GSPT1 TYMP RBBP4 PNPO COX2 HARS RBBP7 RPL18 EIF4B DIC BTF3 NQO1 PGES2 NAP1L1 FPPS PAICS NASP IMPDH1 RPL27A EIF3J RPS21 EIF3B
GOTERM_CC_DIRECT	GO:00005783	endoplasmic reticulum	1019/16364	0.062	1.2216e-07	ANP32A RPN2 EIF5A2 RPN1 PEBP1 PLOD3 PLOD2 PLOD1 MESD RTN4 RAB21 ATRAP LMAN2 COX2 TMED7 RAB2A TPD52 TMED9 FBXO2 GSS P3H1 AHSA1 CNPY2 ACSL3 CNPY3 DDOST TAPBP RCN1 TMX3 RAB14 VAPA P4HA2 VAPB CALU SRPRB
GOTERM_BP_DIRECT	GO:00009058	biosynthetic process	1796/14293	0.125	1.2273e-07	CARS RPL5 CDD RPL30 HEXB ADK PLOD1 YBX1 RO60 RPL18A APMAP TSPO PSPH RPS9 PARP1 SYK ACSL3 6PGD DDOST NME1 ACLY HMBS CMPK1 MVD UMPS RPL28 TSTA3 PUR1 PDXK RPN2 EIF5A2 RPN1 GSPT1 TYMP RBBP4 PNPO COX2 HARS RBBP7 RPL18 EIF4B DIC BTF3 NQO1 PGES2 NAP1L1 FPPS PAICS NASP IMPDH1 RPL27A EIF3J RPS21 EIF3B
GOTERM_BP_DIRECT	GO:00044265	cellular macromolecule catabolic process	441/14293	0.03	1.2935e-07	DFFA UBE2I RPN2 PSMD13 UBA6 FBX22 FBXO2 RPN1 UCHL3 GSPT1 PSMD8 PSMD7 PSMD5 PSMB3 PSMD3 PSME1 HNRNPD CDK1 UBE2N PSME2 CYCS DCPS UBE2K
GOTERM_BP_DIRECT	GO:00006511	ubiquitin-dependent protein catabolic process	277/14293	0.019	1.322e-07	UBE2I RPN2 PSMD13 UBA6 FBX22 FBXO2 RPN1 UCHL3 PSMD8 PSMD7 PSMD5 PSMB3 PSMD3 PSME1 CDK1 UBE2N PSME2 UBE2K
GOTERM_CC_DIRECT	GO:00030529	ribonucleoprotein complex	502/16364	0.03	1.7191e-07	RPL5 RPL30 RPS9 SNRPN PA2G4 YBX1 ILF2 SND1 PTBP1 RO60 ILF3 RPL18A SNRPD1 LA RPL27A HNRNPD DHX15 STRAP SRPRB RPL18 HNRNPA1 RPL28 RPS21
GOTERM_BP_DIRECT	GO:00043632	modification-dependent macromolecule catabolic process	282/14293	0.019	1.7285e-07	UBE2I RPN2 PSMD13 UBA6 FBX22 FBXO2 RPN1 UCHL3 PSMD8 PSMD7 PSMD5 PSMB3 PSMD3 PSME1 CDK1 UBE2N PSME2 UBE2K
GOTERM_BP_DIRECT	GO:00019941	modification-dependent protein catabolic process	282/14293	0.019	1.7285e-07	UBE2I RPN2 PSMD13 UBA6 FBX22 FBXO2 RPN1 UCHL3 PSMD8 PSMD7 PSMD5 PSMB3 PSMD3 PSME1 CDK1 UBE2N PSME2 UBE2K
GOTERM_BP_DIRECT	GO:00031397	negative regulation of protein ubiquitination	78/14293	0.005	1.9081e-07	PSMD8 PSMD7 RPN2 PSMD5 PSMB3 PSMD13 PSMD3 RPN1 PSME1 PSME2
GOTERM_BP_DIRECT	GO:00031396	regulation of protein ubiquitination	121/14293	0.008	2.0174e-07	PSMD8 PSMD7 RPN2 PSMD5 PSMB3 PSMD13 PSMD3 RPN1 PSME1 CDK1 UBE2N PSME2
GOTERM_MF_DIRECT	GO:00003723	RNA binding	732/15430	0.047	2.216e-07	CARS RPL5 PUR1 RPL30 LRP1 EIF5A2 YBX1 PTBP1 RO60 RPL18A SNRPD1 G3BP1 RPL18 HNRNPA1 EIF4B RPS9 SNRPN NSUN2 PA2G4 ILF2 TSN ILF3 LA SARNP RPL27A HNRNPD RPL28 EIF4G1 EIF3B
GOTERM_BP_DIRECT	GO:00044267	cellular protein metabolic process	2150/14293	0.15	6.3387e-07	CARS RPL5 RPL30 HEXB PLOD3 PPP2R2A PLOD2 PLOD1 PSMD8 PSMD7 RPL18A PSMD5 PPME1 PSMD3 TCPZ RPS9 GPX1 PARP1 SYK FBX22 FBXO2 AHSA1 UCHL3 DDOST HMBS PSME1 PSME2 RPL28 RPN2 PSMD13 UBA6 UBA5 EIF5A2 RPN1 GSPT1 GNAI2 PPM1G PRDX2 CAND1 PSMB3 HARS RPL18 PAK2 EIF4B UBE2I TBCA ADHX CDK6 P4HA2 RPL27A EIF3J CDK1 UBE2N NAA15 SAE1 RPS21 SAE2 UBE2K EIF3B
GOTERM_BP_DIRECT	GO:00051603	proteolysis involved in cellular protein catabolic process	311/14293	0.021	7.3121e-07	UBE2I RPN2 PSMD13 UBA6 FBX22 FBXO2 RPN1 UCHL3 PSMD8 PSMD7 PSMD5 PSMB3 PSMD3 PSME1 CDK1 UBE2N PSME2 UBE2K
GOTERM_BP_DIRECT	GO:00044257	cellular protein catabolic process	314/14293	0.021	8.4038e-07	UBE2I RPN2 PSMD13 UBA6 FBX22 FBXO2 RPN1 UCHL3 PSMD8 PSMD7 PSMD5 PSMB3 PSMD3 PSME1 CDK1 UBE2N PSME2 UBE2K
GOTERM_BP_DIRECT	GO:00043161	proteasomal ubiquitin-dependent protein catabolic process	139/14293	0.009	9.1249e-07	PSMD8 PSMD7 RPN2 PSMD5 PSMB3 PSMD13 FBXO2 PSMD3 RPN1 PSME1 CDK1 PSME2
GOTERM_BP_DIRECT	GO:00010498	proteasomal protein catabolic process	139/14293	0.009	9.1249e-07	PSMD8 PSMD7 RPN2 PSMD5 PSMB3 PSMD13 FBXO2 PSMD3 RPN1 PSME1 CDK1 PSME2
GOTERM_MF_DIRECT	GO:00051920	peroxiredoxin activity	7/15430	0	1.1303e-06	PRDX2 PRDX5 PRDX1 PARK7
GOTERM_BP_DIRECT	GO:00009057	macromolecule catabolic process	503/14293	0.035	1.2974e-06	DFFA UBE2I RPN2 PSMD13 UBA6 FBX22 FBXO2 RPN1 UCHL3 GSPT1 PSMD8 PSMD7 PSMD5 PSMB3 PSMD3 PSME1 HNRNPD CDK1 UBE2N PSME2 CYCS DCPS UBE2K
GOTERM_CC_DIRECT	GO:00071212	subsynaptic reticulum	713/16364	0.043	2.07e-06	RPN2 EIF5A2 RPN1 PEBP1 PLOD3 PLOD2 PLOD1 RTN4 RAB21 ATRAP LMAN2 COX2 TMED7 RAB2A TMED9 ACSL3 DDOST TAPBP RCN1 TMX3 RAB14 VAPA P4HA2 VAPB CALU SRPRB
GOTERM_BP_DIRECT	GO:00030163	protein catabolic process	339/14293	0.023	2.5123e-06	UBE2I RPN2 PSMD13 UBA6 FBX22 FBXO2 RPN1 UCHL3 PSMD8 PSMD7 PSMD5 PSMB3 PSMD3 PSME1 CDK1 UBE2N PSME2 UBE2K
GOTERM_MF_DIRECT	GO:00016705	oxidoreductase activity, acting on paired donors, with incorporation or reduction of molecular oxygen	136/15430	0.008	2.5167e-06	FTO PRDX2 PRDX5 P4HA2 PRDX1 P3H1 COX2 PLOD3 PLOD2 PARK7 PLOD1
GOTERM_MF_DIRECT	GO:00008641	small protein activating enzyme activity	9/15430	0	3.9826e-06	UBA6 UBA5 SAE1 SAE2
GOTERM_MF_DIRECT	GO:00016706	oxidoreductase activity, acting on paired donors, with incorporation or reduction of molecular oxygen, 2-oxoglutarate as one donor, and incorporation of one atom each of oxygen into both donors	33/15430	0.002	4.8223e-06	FTO P4HA2 P3H1 PLOD3 PLOD2 PLOD1
GOTERM_BP_DIRECT	GO:00034641	cellular nitrogen compound metabolic process	2075/14293	0.145	5.1585e-06	CARS RPL5 CDD ACY1 ADK PLOD1 YBX1 COMT PTBP1 RO60 GPDM SNRPD1 DHX15 TSPO PSPH DFFA SNRPN PARP1 NSUN2 6PGL 6PGD TSN NME1 ACLY HMBS CMPK1 STRAP BLVRB UMPS FTO TSTA3 PUR1 LRP1 GSPT1 TYMP SULT1A1 RBBP4 HARS RBBP7 HNRNPA1 DCPS BTF3 NQO1 XRCC6 GSS NAP1L1 PA2G4 PAICS NASP LA IMPDH1 HNRNPD UBE2N CYCS EIF4G1
GOTERM_BP_DIRECT	GO:00031400	negative regulation of protein modification process	137/14293	0.009	5.3217e-06	PSMD8 PSMD7 RPN2 PSMD5 PSMB3 PSMD13 PSMD3 RPN1 PSME1 PSME2 PEBP1
GOTERM_CC_DIRECT	GO:00005791	rough endoplasmic reticulum	35/16364	0.002	5.3684e-06	RAB14 RPN1 PEBP1 PLOD3 PLOD2 PLOD1
GOTERM_CC_DIRECT	GO:00022626	cytosolic ribosome	75/16364	0.004	5.7681e-06	RPL5 RPL30 RPS9 RPL18A RPL27A RPL18 RPL28 RPS21
GOTERM_BP_DIRECT	GO:00006807	nitrogen compound metabolic process	2193/14293	0.153	5.9858e-06	CARS RPL5 CDD ACY1 HEXB ADK PLOD1 YBX1 COMT PTBP1 RO60 GPDM SNRPD1 DHX15 TSPO PSPH DFFA SNRPN PARP1 NSUN2 6PGL 6PGD TSN NME1 ACLY HMBS CMPK1 STRAP BLVRB UMPS FTO TSTA3 PUR1 LRP1 GSPT1 TYMP SULT1A1 RBBP4 HARS RBBP7 HNRNPA1 DCPS BTF3 NQO1 XRCC6 GSS NAP1L1 PA2G4 PAICS NASP LA P4HA2 IMPDH1 HNRNPD UBE2N CYCS EIF4G1
GOTERM_CC_DIRECT	GO:00022625	cytosolic large ribosomal subunit	36/16364	0.002	6.3725e-06	RPL5 RPL30 RPL18A RPL27A RPL18 RPL28
GOTERM_MF_DIRECT	GO:00031418	L-ascorbic acid binding	21/15430	0.001	7.5863e-06	P4HA2 P3H1 PLOD3 PLOD2 PLOD1
GOTERM_BP_DIRECT	GO:00031401	positive regulation of protein modification process	231/14293	0.016	7.6993e-06	RPN2 SYK PSMD13 RPN1 PSMD8 PSMD7 PSMD5 PSMB3 PSMD3 PSME1 CDK1 UBE2N PSME2 CD44
GOTERM_BP_DIRECT	GO:00043170	macromolecule metabolic process	4010/14293	0.28	7.9474e-06	CARS RPL5 RPL30 ACY1 HEXB PLOD3 PPP2R2A PLOD2 PLOD1 YBX1 PSMD8 PTBP1 RO60 PSMD7 RPL18A PSMD5 SNRPD1 PPME1 PSMD3 DHX15 TCPZ DFFA RPS9 SNRPN GPX1 PARP1 SYK FBX22 FBXO2 NSUN2 AHSA1 UCHL3 DDOST TSN HMBS PSME1 PSME2 STRAP RPL28 THOP1 FTO PUR1 RPN2 LRP1 PSMD13 UBA6 UBA5 EIF5A2 RPN1 GSPT1 GNAI2 TYMP PPM1G PRDX2 CAND1 RBBP4 PSMB3 HARS RBBP7 RPL18 HNRNPA1 DCPS PAK2 EIF4B BTF3 XRCC6 UBE2I NAP1L1 PA2G4 TBCA…
GOTERM_BP_DIRECT	GO:00055114	oxidation reduction	646/14293	0.045	8.5964e-06	FTO TSTA3 PLOD3 PLOD2 PLOD1 PRDX2 PRDX5 GPDM FTH1 PRDX1 PNPO COX2 NQO1 NQO2 GPX1 TXNL1 P3H1 PTGR1 ADHX 6PGD P4HA2 IMPDH1 CYCS BLVRB ALDH7A1
GOTERM_CC_DIRECT	GO:00044432	endoplasmic reticulum part	678/16364	0.041	8.6822e-06	RAB2A TMED9 RPN2 EIF5A2 RPN1 PLOD3 PLOD2 ACSL3 PLOD1 RTN4 DDOST TAPBP RAB21 RCN1 TMX3 VAPA ATRAP P4HA2 VAPB LMAN2 CALU COX2 SRPRB TMED7
GOTERM_BP_DIRECT	GO:00043086	negative regulation of catalytic activity	300/14293	0.02	8.7553e-06	NQO1 GPX1 RPN2 PSMD13 RPN1 GNAI3 GNAI2 PSMD8 PSMD7 CAND1 PSMD5 PSMB3 PSMD3 PSME1 PSME2 PAK2
GOTERM_BP_DIRECT	GO:00044092	negative regulation of molecular function	374/14293	0.026	9.8142e-06	NQO1 GPX1 RPN2 PSMD13 RPN1 GNAI3 PARK7 GNAI2 PSMD8 PRDX2 PSMD7 CAND1 PSMD5 PSMB3 PSMD3 PSME1 PSME2 PAK2
GOTERM_MF_DIRECT	GO:00000166	nucleotide binding	2253/15430	0.146	1.5451e-05	CARS ARF1 ADK PEBP1 PTBP1 DHX15 TCPZ RAB2A PARP1 SYK ACSL3 ILF2 RHOA 6PGD NME1 ACLY CMPK1 MVD RAB7A PDXK RALA UBA6 ARL3 UBA5 RAB1B GNAI3 GSPT1 GNAI2 CDC42 RAB21 G3BP1 PNPO HARS MOT1 HNRNPA1 PAK2 EIF4B XRCC6 UBE2I GSS ALDR ADHX PAICS RAB11A CDK6 RAB14 LA HNRNPD CDK1 UBE2N SRPRB SAE2 UBE2K EIF3B
GOTERM_CC_DIRECT	GO:00044445	cytosolic part	141/16364	0.008	1.5845e-05	RPL5 RPL30 PRDX5 RPS9 RPL18A RPL27A RPL18 RPL28 RPS21 TCPZ
GOTERM_CC_DIRECT	GO:00044464	cell part	15033/16364	0.918	1.6938e-05	RPL5 CDD RPL30 PITPNB PITPNA PPP2R2A PSMD8 PSMD7 RPL18A PSMD5 SNRPD1 FTH1 PSMD3 VPS35 ACTN1 FBXO2 P3H1 ACSL3 SND1 CDC37 SARNP HMBS PSME1 PSME2 VDAC1 EZR ALDH7A1 RPL28 TSTA3 ANP32A RPN2 EIF5A2 RPN1 GSPT1 SULT1A1 PRDX2 PRDX5 PRDX1 SBP1 COX2 DIC BTF3 XRCC6 PA2G4 FPPS ADHX RPL27A CALU HNRNPD RPS21 ARF1 ACY1 HEXB HEXA ADK XPO2 ANXA6 DHX15 ANXA7 MUC13 TSPO TMED7 TCPZ DFFA TMED9 PARP1 SYK ANXA3 NSUN2 PT…
GOTERM_CC_DIRECT	GO:00005623	cell	15034/16364	0.918	1.7142e-05	RPL5 CDD RPL30 PITPNB PITPNA PPP2R2A PSMD8 PSMD7 RPL18A PSMD5 SNRPD1 FTH1 PSMD3 VPS35 ACTN1 FBXO2 P3H1 ACSL3 SND1 CDC37 SARNP HMBS PSME1 PSME2 VDAC1 EZR ALDH7A1 RPL28 TSTA3 ANP32A RPN2 EIF5A2 RPN1 GSPT1 SULT1A1 PRDX2 PRDX5 PRDX1 SBP1 COX2 DIC BTF3 XRCC6 PA2G4 FPPS ADHX RPL27A CALU HNRNPD RPS21 ARF1 ACY1 HEXB HEXA ADK XPO2 ANXA6 DHX15 ANXA7 MUC13 TSPO TMED7 TCPZ DFFA TMED9 PARP1 SYK ANXA3 NSUN2 PT…
GOTERM_CC_DIRECT	GO:00005739	mitochondrion	1272/16364	0.077	1.8821e-05	HDDC2 YWHAD RAB1B PEBP1 PARK7 COX5B COMT COX5A HEBP1 PRDX2 PRDX5 GPDM FTH1 PRDX1 COX2 TSPO DIC GPX1 PGES2 ALDR TOM40 ACSL3 FPPS ADHX SND1 RHOA RAB11A NME1 ILF3 HMBS CYCS VDAC1 ALDOC BACH ALDH7A1
GOTERM_CC_DIRECT	GO:00044446	intracellular organelle part	4802/16364	0.293	2.0056e-05	RPL5 RPL30 ARF1 YWHAD PEBP1 PLOD3 PLOD2 PLOD1 YBX1 IPO7 PTBP1 LASP1 RPL18A SNRPD1 BASP1 DHX15 ANXA7 TSPO TMED7 RAB2A DFFA TMED9 RPS9 SNRPN PARP1 ANXA3 TPM3 ACTN1 NSUN2 ACSL3 ILF2 DDOST NME1 TAPBP ILF3 RCN1 TMX3 PLIN3 STRAP VDAC1 MVD EZR RPL28 THIO PUR1 RPN2 LRP1 ARL3 EIF5A2 RPN1 GBA CAPG FOXK1 COX5B COX5A RTN4 RAB21 LIMA1 RBBP4 ATRAP SBP1 LMAN2 COX2 RBBP7 RPL18 HNRNPA1 DIC XRCC6 UBE2I CBX3 PGES2 …
GOTERM_CC_DIRECT	GO:00042175	nuclear membrane-endoplasmic reticulum network	625/16364	0.038	2.2943e-05	RAB2A TMED9 RPN2 EIF5A2 RPN1 PLOD3 PLOD2 ACSL3 PLOD1 RTN4 DDOST TAPBP RAB21 TMX3 RAB14 VAPA ATRAP VAPB LMAN2 COX2 SRPRB TMED7
GOTERM_BP_DIRECT	GO:00032270	positive regulation of cellular protein metabolic process	290/14293	0.02	2.4104e-05	RPN2 SYK PSMD13 EIF5A2 RPN1 PSMD8 PSMD7 PSMD5 PSMB3 PSMD3 PSME1 CDK1 UBE2N PSME2 CD44
GOTERM_BP_DIRECT	GO:00006412	translation	291/14293	0.02	2.509e-05	CARS RPL5 RPL30 RPS9 EIF5A2 GSPT1 RPL18A RPL27A EIF3J HARS RPL18 RPL28 RPS21 EIF4B EIF3B
GOTERM_CC_DIRECT	GO:00030867	rough endoplasmic reticulum membrane	14/16364	0	2.5218e-05	RPN1 PLOD3 PLOD2 PLOD1
GOTERM_BP_DIRECT	GO:00044419	interspecies interaction between organisms	327/14293	0.022	2.5431e-05	RALA UBE2I GPX1 SYK SGTA FPPS IPO7 SND1 RHOA PSMB3 VAPB VDAC1 TNPO1 HNRNPA1 PAK2 EIF4G1
GOTERM_MF_DIRECT	GO:00003924	GTPase activity	209/15430	0.013	2.9681e-05	RAB2A CDC42 RAB21 ARF1 RALA RAB14 GNAI3 GSPT1 RHOA RAB11A RAB7A GNAI2
GOTERM_MF_DIRECT	GO:00031406	carboxylic acid binding	148/15430	0.009	3.5054e-05	P4HA2 GSS HMBS P3H1 PLOD3 BACH PLOD2 PLOD1 ADHX ACBP
GOTERM_CC_DIRECT	GO:00044422	organelle part	4869/16364	0.297	3.5911e-05	RPL5 RPL30 ARF1 YWHAD PEBP1 PLOD3 PLOD2 PLOD1 YBX1 IPO7 PTBP1 LASP1 RPL18A SNRPD1 BASP1 DHX15 ANXA7 TSPO TMED7 RAB2A DFFA TMED9 RPS9 SNRPN PARP1 ANXA3 TPM3 ACTN1 NSUN2 ACSL3 ILF2 DDOST NME1 TAPBP ILF3 RCN1 TMX3 PLIN3 STRAP VDAC1 MVD EZR RPL28 THIO PUR1 RPN2 LRP1 ARL3 EIF5A2 RPN1 GBA CAPG FOXK1 COX5B COX5A RTN4 RAB21 LIMA1 RBBP4 ATRAP SBP1 LMAN2 COX2 RBBP7 RPL18 HNRNPA1 DIC XRCC6 UBE2I CBX3 PGES2 …
GOTERM_BP_DIRECT	GO:00051247	positive regulation of protein metabolic process	307/14293	0.021	4.6505e-05	RPN2 SYK PSMD13 EIF5A2 RPN1 PSMD8 PSMD7 PSMD5 PSMB3 PSMD3 PSME1 CDK1 UBE2N PSME2 CD44
GOTERM_BP_DIRECT	GO:00045454	cell redox homeostasis	66/14293	0.004	4.8472e-05	PRDX2 PRDX5 TMX3 GPX1 PGES2 PRDX1 TXNL1
GOTERM_CC_DIRECT	GO:00005789	endoplasmic reticulum membrane	610/16364	0.037	4.8971e-05	RAB2A TMED9 RPN2 EIF5A2 RPN1 PLOD3 PLOD2 ACSL3 PLOD1 RTN4 DDOST TAPBP RAB21 TMX3 VAPA ATRAP VAPB LMAN2 COX2 SRPRB TMED7
GOTERM_MF_DIRECT	GO:00005525	GTP binding	373/15430	0.024	5.2988e-05	RAB2A ARF1 RALA ARL3 RAB1B GNAI3 GSPT1 RHOA RAB11A NME1 GNAI2 CDC42 RAB21 RAB14 SRPRB RAB7A
GOTERM_BP_DIRECT	GO:00051246	regulation of protein metabolic process	635/14293	0.044	5.6529e-05	UBE2I RPN2 SYK PSMD13 EIF5A2 RPN1 PEBP1 PA2G4 PSMD8 PSMD7 PSMD5 PSMB3 SARNP PSMD3 PSME1 CDK1 UBE2N PSME2 UBE2K CD44 EIF4B EIF4G1 EIF3B
GOTERM_MF_DIRECT	GO:00016684	oxidoreductase activity, acting on peroxide as acceptor	31/15430	0.002	5.6704e-05	PRDX2 PRDX5 GPX1 PRDX1 COX2
GOTERM_MF_DIRECT	GO:00004601	peroxidase activity	31/15430	0.002	5.6704e-05	PRDX2 PRDX5 GPX1 PRDX1 COX2
GOTERM_BP_DIRECT	GO:00019538	protein metabolic process	2608/14293	0.182	6.8716e-05	CARS RPL5 RPL30 ACY1 HEXB PLOD3 PPP2R2A PLOD2 PLOD1 PSMD8 PSMD7 RPL18A PSMD5 PPME1 PSMD3 TCPZ RPS9 GPX1 PARP1 SYK FBX22 FBXO2 AHSA1 UCHL3 DDOST HMBS PSME1 PSME2 RPL28 THOP1 RPN2 PSMD13 UBA6 UBA5 EIF5A2 RPN1 GSPT1 GNAI2 PPM1G PRDX2 CAND1 PSMB3 HARS RPL18 PAK2 EIF4B UBE2I TBCA ADHX CDK6 P4HA2 RPL27A EIF3J CDK1 UBE2N NAA15 SAE1 RPS21 SAE2 UBE2K EIF3B
GOTERM_BP_DIRECT	GO:00032268	regulation of cellular protein metabolic process	559/14293	0.039	7.228e-05	RPN2 SYK PSMD13 EIF5A2 RPN1 PEBP1 PA2G4 PSMD8 PSMD7 PSMD5 PSMB3 SARNP PSMD3 PSME1 CDK1 UBE2N PSME2 CD44 EIF4B EIF4G1 EIF3B
GOTERM_MF_DIRECT	GO:00019001	guanyl nucleotide binding	385/15430	0.024	7.6991e-05	RAB2A ARF1 RALA ARL3 RAB1B GNAI3 GSPT1 RHOA RAB11A NME1 GNAI2 CDC42 RAB21 RAB14 SRPRB RAB7A
GOTERM_MF_DIRECT	GO:00032561	guanyl ribonucleotide binding	385/15430	0.024	7.6991e-05	RAB2A ARF1 RALA ARL3 RAB1B GNAI3 GSPT1 RHOA RAB11A NME1 GNAI2 CDC42 RAB21 RAB14 SRPRB RAB7A
GOTERM_CC_DIRECT	GO:00005625	soluble fraction	320/16364	0.019	8.0254e-05	RAB2A YWHAD HEXB GSS 6PGL PEBP1 CAB45 COMT ADHX IPO7 NME1 ANXA7 MVD THOP1
GOTERM_BP_DIRECT	GO:00048523	negative regulation of cellular process	1843/14293	0.128	8.1576e-05	PUR1 CDD YWHAD RPN2 LRP1 PSMD13 RPN1 GNAI3 PEBP1 CAPG COMT TCTP RTN4 GNAI2 PPM1G PSMD8 PRDX2 LIMA1 PRDX5 PSMD7 RBBP4 PSMD5 PSMB3 BASP1 PODXL FTH1 ARHGDIA PSMD3 COX2 MOT1 RBBP7 DFFA UBE2I GPX1 CBX3 ACTN1 GSS P3H1 PA2G4 RHOA NME1 ILF3 CDK6 PSME1 CDK1 PSME2 CD44
GOTERM_MF_DIRECT	GO:00051213	dioxygenase activity	77/15430	0.004	8.4001e-05	FTO P4HA2 P3H1 COX2 PLOD3 PLOD2 PLOD1
GOTERM_MF_DIRECT	GO:00016702	oxidoreductase activity, acting on single donors with incorporation of molecular oxygen, incorporation of two atoms of oxygen	77/15430	0.004	8.4001e-05	FTO P4HA2 P3H1 COX2 PLOD3 PLOD2 PLOD1
GOTERM_BP_DIRECT	GO:00006414	translational elongation	97/14293	0.006	8.6673e-05	RPL5 RPL30 RPS9 RPL18A RPL27A RPL18 RPL28 RPS21
GOTERM_MF_DIRECT	GO:00016701	oxidoreductase activity, acting on single donors with incorporation of molecular oxygen	78/15430	0.005	9.1231e-05	FTO P4HA2 P3H1 COX2 PLOD3 PLOD2 PLOD1
GOTERM_BP_DIRECT	GO:00044283	small molecule biosynthetic process	445/14293	0.031	9.6288e-05	TSTA3 CDD PDXK SYK PGES2 ADK ACSL3 PLOD1 PAICS 6PGD NME1 IMPDH1 PNPO CMPK1 COX2 UMPS PSPH DIC
GOTERM_MF_DIRECT	GO:00032555	purine ribonucleotide binding	1844/15430	0.119	0.00013122	CARS ARF1 PDXK RALA UBA6 ARL3 UBA5 RAB1B ADK GNAI3 PEBP1 GSPT1 GNAI2 CDC42 RAB21 G3BP1 DHX15 HARS MOT1 PAK2 TCPZ RAB2A XRCC6 UBE2I SYK GSS ALDR ACSL3 PAICS ILF2 RHOA RAB11A NME1 ACLY CDK6 RAB14 CMPK1 CDK1 UBE2N SRPRB MVD SAE2 UBE2K RAB7A
GOTERM_MF_DIRECT	GO:00032553	ribonucleotide binding	1844/15430	0.119	0.00013122	CARS ARF1 PDXK RALA UBA6 ARL3 UBA5 RAB1B ADK GNAI3 PEBP1 GSPT1 GNAI2 CDC42 RAB21 G3BP1 DHX15 HARS MOT1 PAK2 TCPZ RAB2A XRCC6 UBE2I SYK GSS ALDR ACSL3 PAICS ILF2 RHOA RAB11A NME1 ACLY CDK6 RAB14 CMPK1 CDK1 UBE2N SRPRB MVD SAE2 UBE2K RAB7A
GOTERM_BP_DIRECT	GO:00046483	heterocycle metabolic process	337/14293	0.023	0.00013227	CDD PDXK ADK PAICS NME1 TYMP ACLY P4HA2 IMPDH1 HMBS PNPO CMPK1 TSPO BLVRB UMPS
GOTERM_BP_DIRECT	GO:00006139	nucleobase, nucleoside, nucleotide and nucleic acid metabolic process	1783/14293	0.124	0.00015324	CARS FTO RPL5 TSTA3 PUR1 CDD LRP1 ADK YBX1 GSPT1 TYMP PTBP1 RO60 GPDM RBBP4 SNRPD1 DHX15 HARS RBBP7 HNRNPA1 DCPS BTF3 XRCC6 DFFA SNRPN PARP1 NSUN2 6PGL NAP1L1 PA2G4 PAICS 6PGD TSN NME1 ACLY NASP LA IMPDH1 HNRNPD CMPK1 UBE2N STRAP CYCS UMPS EIF4G1
GOTERM_CC_DIRECT	GO:00031982	vesicle	714/16364	0.043	0.00016244	RAB2A YWHAD LRP1 ANXA3 HEXB RPN1 GNAI3 SAHH PEBP1 CAPG NAP1L1 SND1 RAB11A RAB21 RAB14 VAPA ATRAP PRDX1 CALU ANXA6 ANXA7 RAB7A
GOTERM_CC_DIRECT	GO:00015934	large ribosomal subunit	63/16364	0.003	0.00016599	RPL5 RPL30 RPL18A RPL27A RPL18 RPL28
GOTERM_BP_DIRECT	GO:00032269	negative regulation of cellular protein metabolic process	199/14293	0.013	0.00016755	PSMD8 PSMD7 RPN2 PSMD5 PSMB3 PSMD13 PSMD3 RPN1 PSME1 PSME2 PEBP1
GOTERM_CC_DIRECT	GO:00033279	ribosomal subunit	120/16364	0.007	0.00017431	RPL5 RPL30 RPS9 RPL18A RPL27A RPL18 RPL28 RPS21
GOTERM_MF_DIRECT	GO:00048037	cofactor binding	253/15430	0.016	0.00018464	TSTA3 NQO1 NQO2 PDXK PARP1 UBA5 HMBS PNPO BACH ADHX 6PGD ACBP
GOTERM_MF_DIRECT	GO:00050662	coenzyme binding	181/15430	0.011	0.00018856	TSTA3 NQO1 NQO2 PARP1 HMBS PNPO BACH ADHX 6PGD ACBP
GOTERM_BP_DIRECT	GO:00048519	negative regulation of biological process	2019/14293	0.141	0.00018948	CDD YWHAD PEBP1 COMT TCTP PSMD8 PSMD7 PSMD5 BASP1 FTH1 ARHGDIA PSMD3 DFFA GPX1 ACTN1 P3H1 SND1 RHOA NME1 ILF3 PSME1 PSME2 CD44 PUR1 RPN2 LRP1 PSMD13 RPN1 GNAI3 CAPG RTN4 GNAI2 PPM1G CDC42 PRDX2 LIMA1 PRDX5 RBBP4 PSMB3 PODXL COX2 MOT1 RBBP7 UBE2I CBX3 GSS PA2G4 CDK6 CDK1
GOTERM_BP_DIRECT	GO:00034614	cellular response to reactive oxygen species	38/14293	0.002	0.00021598	PRDX2 PRDX5 GPX1 PRDX1 CDK1
GOTERM_MF_DIRECT	GO:00016830	carbon-carbon lyase activity	43/15430	0.002	0.00028139	ACLY ALDOC MVD UMPS PAICS
GOTERM_BP_DIRECT	GO:00051248	negative regulation of protein metabolic process	212/14293	0.014	0.00029007	PSMD8 PSMD7 RPN2 PSMD5 PSMB3 PSMD13 PSMD3 RPN1 PSME1 PSME2 PEBP1
GOTERM_BP_DIRECT	GO:00009116	nucleoside metabolic process	63/14293	0.004	0.00030885	ACLY CDD ADK UMPS NME1 TYMP
GOTERM_CC_DIRECT	GO:00016023	cytoplasmic membrane-bounded vesicle	647/16364	0.039	0.00031198	RAB2A YWHAD LRP1 ANXA3 HEXB RPN1 GNAI3 SAHH PEBP1 CAPG NAP1L1 SND1 RAB11A RAB21 RAB14 ATRAP PRDX1 CALU ANXA6 RAB7A
GOTERM_BP_DIRECT	GO:00009112	nucleobase metabolic process	23/14293	0.001	0.00031626	CDD UMPS PAICS TYMP
GOTERM_BP_DIRECT	GO:00031399	regulation of protein modification process	366/14293	0.025	0.00032277	RPN2 SYK PSMD13 RPN1 PEBP1 PSMD8 PSMD7 PSMD5 PSMB3 PSMD3 PSME1 CDK1 UBE2N PSME2 CD44
GOTERM_MF_DIRECT	GO:00017076	purine nucleotide binding	1927/15430	0.124	0.00035107	CARS ARF1 PDXK RALA UBA6 ARL3 UBA5 RAB1B ADK GNAI3 PEBP1 GSPT1 GNAI2 CDC42 RAB21 G3BP1 DHX15 HARS MOT1 PAK2 TCPZ RAB2A XRCC6 UBE2I SYK GSS ALDR ACSL3 PAICS ILF2 RHOA RAB11A NME1 ACLY CDK6 RAB14 CMPK1 CDK1 UBE2N SRPRB MVD SAE2 UBE2K RAB7A
GOTERM_BP_DIRECT	GO:00006979	response to oxidative stress	183/14293	0.012	0.00036281	PRDX2 NQO1 PRDX5 GPX1 PRDX1 GSS CDK1 COX2 PEBP1 PARK7
GOTERM_BP_DIRECT	GO:00007264	small GTPase mediated signal transduction	292/14293	0.02	0.00037063	RAB2A ARF1 RALA ARL3 RAB1B RHOA RAB11A CDC42 RAB21 RAB14 ARHGDIA G3BP1 RAB7A
GOTERM_BP_DIRECT	GO:00009156	ribonucleoside monophosphate biosynthetic process	24/14293	0.001	0.00037519	IMPDH1 ADK UMPS PAICS
GOTERM_BP_DIRECT	GO:00006213	pyrimidine nucleoside metabolic process	24/14293	0.001	0.00037519	CDD UMPS NME1 TYMP
GOTERM_MF_DIRECT	GO:00019003	GDP binding	26/15430	0.001	0.00039406	RAB2A RAB21 RAB14 ARL3
GOTERM_MF_DIRECT	GO:00009055	electron carrier activity	163/15430	0.01	0.00039612	TSTA3 NQO1 NQO2 PGES2 P4HA2 COX2 CYCS ADHX COX5A
GOTERM_MF_DIRECT	GO:00016209	antioxidant activity	47/15430	0.003	0.00042908	PRDX2 PRDX5 GPX1 PRDX1 COX2
GOTERM_CC_DIRECT	GO:00043234	protein complex	2599/16364	0.158	0.00043025	YWHAD PPP2R2A YBX1 IPO7 PSMD8 PSMD7 GPDM PSMD5 FTH1 PSMD3 ANXA6 TCPZ PARP1 SYK TPM3 FBXO2 DDOST NME1 TAPBP ACLY PSME1 PSME2 VDAC1 EZR CD44 PUR1 RPN2 LRP1 PSMD13 EIF5A2 RPN1 CAPG RTN4 PPM1G CAND1 RBBP4 PSMB3 COX2 RBBP7 EIF4B XRCC6 ALDR NAP1L1 TOM40 TBCA CDK6 EIF3J CDK1 UBE2N CYCS NAA15 EIF4G1 EIF3B
GOTERM_BP_DIRECT	GO:00070301	cellular response to hydrogen peroxide	25/14293	0.001	0.00044158	PRDX2 GPX1 PRDX1 CDK1
GOTERM_CC_DIRECT	GO:00031988	membrane-bounded vesicle	665/16364	0.04	0.00044307	RAB2A YWHAD LRP1 ANXA3 HEXB RPN1 GNAI3 SAHH PEBP1 CAPG NAP1L1 SND1 RAB11A RAB21 RAB14 ATRAP PRDX1 CALU ANXA6 RAB7A
GOTERM_BP_DIRECT	GO:00000278	mitotic cell cycle	380/14293	0.026	0.00047895	UBE2I RPN2 PSMD13 RPN1 CAPG GSPT1 PSMD8 PSMD7 CDK6 PSMD5 PSMB3 PSMD3 PSME1 CDK1 PSME2
GOTERM_BP_DIRECT	GO:00044262	cellular carbohydrate metabolic process	380/14293	0.026	0.00047895	TSTA3 RPN2 ADPGK HEXB 6PGL RPN1 6PGD DDOST ACLY GPDM PGM2 ALDOC GALM PGM1 DIC
GOTERM_BP_DIRECT	GO:00051704	multi-organism process	785/14293	0.054	0.00050024	RALA UBE2I GPX1 SYK ANXA3 HEXB SGTA FPPS COMT TCTP ADHX IPO7 SND1 RHOA PRDX2 CDK6 PSMB3 VAPB COX2 VDAC1 TNPO1 HNRNPA1 PAK2 EIF4G1
GOTERM_MF_DIRECT	GO:00005506	iron ion binding	205/15430	0.013	0.00050935	FTO HEBP1 P4HA2 FTH1 P3H1 COX2 PLOD3 CYCS PLOD2 PLOD1
GOTERM_BP_DIRECT	GO:00009161	ribonucleoside monophosphate metabolic process	26/14293	0.001	0.00051593	IMPDH1 ADK UMPS PAICS
GOTERM_BP_DIRECT	GO:00042743	hydrogen peroxide metabolic process	26/14293	0.001	0.00051593	PRDX2 GPX1 PRDX1 PARK7
GOTERM_MF_DIRECT	GO:00016616	oxidoreductase activity, acting on the CH-OH group of donors, NAD or NADP as acceptor	104/15430	0.006	0.00054482	TSTA3 GPDM IMPDH1 UBA5 PTGR1 ADHX 6PGD
GOTERM_BP_DIRECT	GO:00007049	cell cycle	794/14293	0.055	0.00058814	RALA UBE2I RPN2 PSMD13 GSS ARL3 RPN1 CAPG PA2G4 GSPT1 RAB11A PPM1G PSMD8 ILF3 PSMD7 CDK6 NASP RBBP4 PSMD5 PSMB3 PSMD3 PSME1 CDK1 PSME2
GOTERM_BP_DIRECT	GO:00006066	alcohol metabolic process	433/14293	0.03	0.00063955	TSTA3 ADPGK HEXB 6PGL FPPS COMT ADHX 6PGD SULT1A1 GPDM PGM2 ALDOC MVD GALM PGM1 DIC
GOTERM_CC_DIRECT	GO:00031410	cytoplasmic vesicle	685/16364	0.041	0.00064278	RAB2A YWHAD LRP1 ANXA3 HEXB RPN1 GNAI3 SAHH PEBP1 CAPG NAP1L1 SND1 RAB11A RAB21 RAB14 ATRAP PRDX1 CALU ANXA6 RAB7A
GOTERM_BP_DIRECT	GO:00009119	ribonucleoside metabolic process	49/14293	0.003	0.00072038	ACLY CDD ADK UMPS NME1
GOTERM_CC_DIRECT	GO:00000267	cell fraction	1078/16364	0.065	0.0008122	YWHAD LRP1 HEXB GNAI3 PEBP1 COMT IPO7 GNAI2 COX2 ANXA7 PSPH RAB2A XRCC6 FBXO2 GSS 6PGL TOM40 ACSL3 CAB45 ADHX DDOST NME1 TAPBP RAB14 VAPB MVD THOP1
GOTERM_BP_DIRECT	GO:00022402	cell cycle process	582/14293	0.04	0.00091321	UBE2I RPN2 PSMD13 GSS RPN1 CAPG PA2G4 GSPT1 PPM1G PSMD8 ILF3 PSMD7 CDK6 PSMD5 PSMB3 PSMD3 PSME1 CDK1 PSME2
GOTERM_MF_DIRECT	GO:00016614	oxidoreductase activity, acting on CH-OH group of donors	115/15430	0.007	0.00099119	TSTA3 GPDM IMPDH1 UBA5 PTGR1 ADHX 6PGD
GOTERM_MF_DIRECT	GO:00008565	protein transporter activity	84/15430	0.005	0.00099544	TSNAX XPO2 IPO9 TOM40 TNPO1 IPO7
GOTERM_BP_DIRECT	GO:00044093	positive regulation of molecular function	638/14293	0.044	0.0011016	RPN2 SYK LRP1 ANXA3 PSMD13 RPN1 GSPT1 NME1 GNAI2 PSMD8 PRDX2 PSMD7 PSMD5 PSMB3 PSMD3 PSME1 CDK1 UBE2N PSME2 CYCS
GOTERM_BP_DIRECT	GO:00034645	cellular macromolecule biosynthetic process	1032/14293	0.072	0.0011074	CARS RPL5 PUR1 RPL30 RPN2 EIF5A2 RPN1 YBX1 GSPT1 TYMP RO60 RPL18A RBBP4 HARS RBBP7 RPL18 EIF4B BTF3 RPS9 PARP1 NAP1L1 DDOST NASP RPL27A EIF3J RPL28 RPS21 EIF3B
GOTERM_BP_DIRECT	GO:00034599	cellular response to oxidative stress	54/14293	0.003	0.0011263	PRDX2 PRDX5 GPX1 PRDX1 CDK1
GOTERM_BP_DIRECT	GO:00043085	positive regulation of catalytic activity	553/14293	0.038	0.0012864	RPN2 SYK LRP1 PSMD13 RPN1 GSPT1 GNAI2 PSMD8 PRDX2 PSMD7 PSMD5 PSMB3 PSMD3 PSME1 CDK1 UBE2N PSME2 CYCS
GOTERM_BP_DIRECT	GO:00005996	monosaccharide metabolic process	216/14293	0.015	0.0013068	TSTA3 ADPGK HEXB 6PGL PGM2 ALDOC GALM 6PGD PGM1 DIC
GOTERM_MF_DIRECT	GO:00003735	structural constituent of ribosome	158/15430	0.01	0.001451	RPL5 RPL30 RPS9 RPL18A RPL27A RPL18 RPL28 RPS21
GOTERM_BP_DIRECT	GO:00009059	macromolecule biosynthetic process	1053/14293	0.073	0.0014968	CARS RPL5 PUR1 RPL30 RPN2 EIF5A2 RPN1 YBX1 GSPT1 TYMP RO60 RPL18A RBBP4 HARS RBBP7 RPL18 EIF4B BTF3 RPS9 PARP1 NAP1L1 DDOST NASP RPL27A EIF3J RPL28 RPS21 EIF3B
GOTERM_BP_DIRECT	GO:00019318	hexose metabolic process	185/14293	0.012	0.0016114	TSTA3 ADPGK 6PGL PGM2 ALDOC GALM 6PGD PGM1 DIC
GOTERM_BP_DIRECT	GO:00000302	response to reactive oxygen species	86/14293	0.006	0.0016191	PRDX2 PRDX5 GPX1 PRDX1 CDK1 PARK7
GOTERM_BP_DIRECT	GO:00050790	regulation of catalytic activity	907/14293	0.063	0.001668	RPN2 LRP1 PSMD13 RPN1 GNAI3 GSPT1 GNAI2 PSMD8 PRDX2 PSMD7 CAND1 PSMD5 PSMB3 PSMD3 PAK2 NQO1 GPX1 SYK RCN1 CDC37 PSME1 CDK1 UBE2N PSME2 CYCS
GOTERM_BP_DIRECT	GO:00065009	regulation of molecular function	1062/14293	0.074	0.0016971	RPN2 LRP1 PSMD13 RPN1 GNAI3 PARK7 GSPT1 GNAI2 PSMD8 PRDX2 PSMD7 CAND1 PSMD5 PSMB3 PSMD3 PAK2 NQO1 GPX1 SYK ANXA3 NME1 RCN1 CDC37 PSME1 CDK1 UBE2N PSME2 CYCS
GOTERM_BP_DIRECT	GO:00005975	carbohydrate metabolic process	522/14293	0.036	0.0017394	TSTA3 RPN2 ADPGK HEXB 6PGL RPN1 HEXA GBA 6PGD DDOST ACLY GPDM PGM2 ALDOC GALM PGM1 DIC
GOTERM_BP_DIRECT	GO:00055086	nucleobase, nucleoside and nucleotide metabolic process	305/14293	0.021	0.0017974	ACLY CDD GPDM IMPDH1 6PGL ADK CMPK1 UMPS PAICS 6PGD NME1 TYMP
GOTERM_CC_DIRECT	GO:00012505	endomembrane system	1434/16364	0.087	0.0018125	ARF1 RPN2 LRP1 ARL3 EIF5A2 RPN1 PLOD3 CAPG PLOD2 PLOD1 IPO7 RTN4 RAB21 ATRAP LMAN2 COX2 ANXA7 TMED7 RAB2A TMED9 PARP1 ANXA3 CBX3 PGES2 ACSL3 DDOST TAPBP TMX3 RAB14 VAPA VAPB SRPRB
GOTERM_MF_DIRECT	GO:00016874	ligase activity	421/15430	0.027	0.0019125	CARS UBE2I UBA6 FBX22 FBXO2 GSS ACSL3 PAICS ACLY UBE2N HARS SAE1 SAE2 UBE2K
GOTERM_CC_DIRECT	GO:00031090	organelle membrane	1870/16364	0.114	0.0019392	ARF1 RPN2 ARL3 EIF5A2 RPN1 GBA PEBP1 PLOD3 CAPG PLOD2 PLOD1 COX5B COX5A RTN4 RAB21 ATRAP SBP1 LMAN2 COX2 TSPO TMED7 DIC RAB2A TMED9 ANXA3 CBX3 PGES2 ALDR TOM40 ACSL3 RAB11A DDOST TAPBP TMX3 VAPA VAPB PLIN3 SRPRB VDAC1
GOTERM_BP_DIRECT	GO:00009410	response to xenobiotic stimulus	37/14293	0.002	0.0020105	SULT1A1 NQO1 GPX1 GSS
GOTERM_BP_DIRECT	GO:00006220	pyrimidine nucleotide metabolic process	37/14293	0.002	0.0020105	CMPK1 UMPS NME1 TYMP
GOTERM_BP_DIRECT	GO:00018193	peptidyl-amino acid modification	158/14293	0.011	0.0022638	RPN2 P4HA2 HMBS EIF5A2 RPN1 NAA15 ADHX DDOST
GOTERM_BP_DIRECT	GO:00042221	response to chemical stimulus	1464/14293	0.102	0.0023905	RALA YWHAD PEBP1 PLOD3 PLOD2 PARK7 PLOD1 COMT NDRG1 GNAI2 TYMP SULT1A1 PRDX2 PRDX5 PRDX1 COX2 PSPH NQO1 GPX1 PARP1 SYK ANXA3 GSS ACSL3 CAB45 DEK PTGR1 ADHX DDOST NME1 VAPB CDK1 ALDOC MVD CD44
GOTERM_MF_DIRECT	GO:00042802	identical protein binding	684/15430	0.044	0.0025704	CARS TPD52 CDD DFFA PDXK SNRPN PARP1 HEXB GSS CAB45 PLOD1 ADHX PAICS NME1 VAPB ARHGDIA STRAP MVD PAK2
GOTERM_BP_DIRECT	GO:00009636	response to toxin	65/14293	0.004	0.0025844	NQO1 GPX1 CDK1 PEBP1 PTGR1
GOTERM_BP_DIRECT	GO:00042542	response to hydrogen peroxide	65/14293	0.004	0.0025844	PRDX2 GPX1 PRDX1 CDK1 PARK7
GOTERM_BP_DIRECT	GO:00010035	response to inorganic substance	237/14293	0.016	0.0025879	PRDX2 PRDX5 GPX1 PRDX1 GSS CDK1 COX2 PEBP1 PARK7 NDRG1
GOTERM_BP_DIRECT	GO:00031324	negative regulation of cellular metabolic process	786/14293	0.054	0.0026347	PUR1 CDD UBE2I RPN2 LRP1 PSMD13 CBX3 RPN1 PEBP1 PA2G4 COMT PSMD8 PRDX2 ILF3 PSMD7 PSMD5 PSMB3 BASP1 PSMD3 PSME1 PSME2 MOT1
GOTERM_BP_DIRECT	GO:00009124	nucleoside monophosphate biosynthetic process	40/14293	0.002	0.0026888	IMPDH1 ADK UMPS PAICS
GOTERM_CC_DIRECT	GO:00005730	nucleolus	458/16364	0.027	0.0027612	RPL5 RPS9 PARP1 LRP1 ACTN1 NSUN2 CAPG FOXK1 PA2G4 ILF2 PTBP1 ILF3 LA HNRNPA1
GOTERM_BP_DIRECT	GO:00010467	gene expression	1261/14293	0.088	0.002844	CARS RPL5 PUR1 RPL30 LRP1 EIF5A2 YBX1 GSPT1 PTBP1 RO60 RPL18A SNRPD1 DHX15 HARS RPL18 HNRNPA1 EIF4B BTF3 RPS9 SNRPN PARP1 NSUN2 PA2G4 LA RPL27A EIF3J HNRNPD STRAP RPL28 RPS21 EIF3B
GOTERM_CC_DIRECT	GO:00005794	Golgi apparatus	888/16364	0.054	0.0028613	RAB2A ARF1 PGES2 PITPNB GSS ARL3 RAB1B GNAI3 PEBP1 CAB45 SND1 RAB11A TAPBP RAB21 RAB14 ATRAP VAPB LMAN2 CALU PLIN3 NUCB1 RAB7A
GOTERM_BP_DIRECT	GO:00009117	nucleotide metabolic process	281/14293	0.019	0.0028734	ACLY GPDM IMPDH1 6PGL ADK CMPK1 UMPS PAICS 6PGD NME1 TYMP
GOTERM_BP_DIRECT	GO:00006753	nucleoside phosphate metabolic process	281/14293	0.019	0.0028734	ACLY GPDM IMPDH1 6PGL ADK CMPK1 UMPS PAICS 6PGD NME1 TYMP
GOTERM_BP_DIRECT	GO:00010608	posttranscriptional regulation of gene expression	241/14293	0.016	0.0029193	SARNP EIF5A2 HNRNPD PA2G4 YBX1 SND1 EIF4B ACBP EIF4G1 EIF3B
GOTERM_MF_DIRECT	GO:00008135	translation factor activity, nucleic acid binding	73/15430	0.004	0.0031596	EIF5A2 GSPT1 EIF4B EIF4G1 EIF3B
GOTERM_CC_DIRECT	GO:00005840	ribosome	196/16364	0.011	0.0041969	RPL5 RPL30 RPS9 RPL18A RPL27A RPL18 RPL28 RPS21
GOTERM_CC_DIRECT	GO:00044438	microbody part	51/16364	0.003	0.0043233	ALDR MVD ACSL3 THIO
GOTERM_CC_DIRECT	GO:00044439	peroxisomal part	51/16364	0.003	0.0043233	ALDR MVD ACSL3 THIO
GOTERM_CC_DIRECT	GO:00005793	ER-Golgi intermediate compartment	52/16364	0.003	0.0046367	RAB2A TMED9 LMAN2 NUCB1
GOTERM_MF_DIRECT	GO:00016829	lyase activity	153/15430	0.009	0.0049788	ACLY XRCC6 APMAP ALDOC MVD UMPS PAICS
GOTERM_CC_DIRECT	GO:00031967	organelle envelope	659/16364	0.04	0.0057502	PARP1 CBX3 EIF5A2 PEBP1 CAPG TOM40 ACSL3 COX5B COX5A IPO7 RTN4 COX2 ANXA7 TSPO CYCS VDAC1 DIC
GOTERM_CC_DIRECT	GO:00044428	nuclear part	1740/16364	0.106	0.0059964	RPL5 PUR1 LRP1 EIF5A2 CAPG FOXK1 YBX1 IPO7 RTN4 PTBP1 RBBP4 SNRPD1 BASP1 DHX15 ANXA7 RBBP7 HNRNPA1 XRCC6 DFFA RPS9 SNRPN UBE2I PARP1 CBX3 ACTN1 NSUN2 NAP1L1 PA2G4 ILF2 ILF3 LA HNRNPD CDK1 STRAP NAA15
GOTERM_CC_DIRECT	GO:00005741	mitochondrial outer membrane	90/16364	0.005	0.0064043	TSPO PEBP1 VDAC1 TOM40 ACSL3
GOTERM_CC_DIRECT	GO:00031975	envelope	672/16364	0.041	0.00694	PARP1 CBX3 EIF5A2 PEBP1 CAPG TOM40 ACSL3 COX5B COX5A IPO7 RTN4 COX2 ANXA7 TSPO CYCS VDAC1 DIC
GOTERM_CC_DIRECT	GO:00042579	microbody	100/16364	0.006	0.0098896	PRDX5 ALDR MVD ACSL3 THIO
GOTERM_CC_DIRECT	GO:00005777	peroxisome	100/16364	0.006	0.0098896	PRDX5 ALDR MVD ACSL3 THIO
