# Supplementary material for: Long noncoding RNA HOTAIR interacts with Y-Box Protein-1 (YBX1) to regulate cell proliferation
Source: Life Sci Alliance. 2021 Jul 15;4(9):e202101139. doi: 10.26508/lsa.202101139 (PMC8321693; doi:10.26508/lsa.202101139)
Supplement: Supplementary file 4 [file LSA-2021-01139_TableS4.xls]

## Sheet: Sheet1
S4 Table Protein-protein interaction information of the identified HOTAIR-interacting proteins
node1	node2	node1_string_internal_id	node2_string_internal_id	node1_external_id	node2_external_id	neighborhood_on_chromosome	gene_fusion	phylogenetic_cooccurrence	homology	coexpression	experimentally_determined_interaction	database_annotated	automated_textmining	combined_score
RPL27A	RPL18A	4441578	4433211	9606.ENSP00000346015	9606.ENSP00000222247	0	0	0	0	0.997	0.992	0.9	0.608	0.999
RPL5	RPS9	4443502	4437909	9606.ENSP00000359345	9606.ENSP00000302896	0.219	0	0	0	0.986	0.986	0.9	0.897	0.999
RPL18	RPS9	4450217	4437909	9606.ENSP00000447001	9606.ENSP00000302896	0.219	0	0	0	0.991	0.991	0.9	0.672	0.999
PSMD13	PSMD8	4447954	4432854	9606.ENSP00000396937	9606.ENSP00000215071	0	0	0	0	0.533	0.969	0.9	0.896	0.999
RPL28	RPL27A	4450412	4441578	9606.ENSP00000452909	9606.ENSP00000346015	0	0	0	0	0.993	0.797	0.9	0.91	0.999
RPL30	RPL5	4449429	4443502	9606.ENSP00000428085	9606.ENSP00000359345	0	0	0	0	0.99	0.99	0.9	0.766	0.999
PSMD13	PSMD3	4447954	4435463	9606.ENSP00000396937	9606.ENSP00000264639	0	0	0	0	0.877	0.971	0.9	0.896	0.999
RPS21	RPL18A	4441569	4433211	9606.ENSP00000345957	9606.ENSP00000222247	0	0	0	0	0.99	0.991	0.9	0.109	0.999
COX2	COX5B	4442560	4434630	9606.ENSP00000354876	9606.ENSP00000258424	0	0	0	0	0.303	0.998	0.9	0.762	0.999
SNRPN	SNRPD1	4446975	4437667	9606.ENSP00000382972	9606.ENSP00000300413	0	0	0	0	0.75	0.904	0.9	0.787	0.999
PSMB3	PSMD7	4451799	4433080	9606.ENSP00000483688	9606.ENSP00000219313	0	0	0	0	0.697	0.992	0.9	0.537	0.999
COX5A	COX5B	4439151	4434630	9606.ENSP00000317780	9606.ENSP00000258424	0	0	0	0	0.949	0.87	0.9	0.869	0.999
PSMD7	PSMD8	4433080	4432854	9606.ENSP00000219313	9606.ENSP00000215071	0	0	0	0	0.896	0.993	0.9	0.892	0.999
UBE2I	SAE2	4441792	4433986	9606.ENSP00000348056	9606.ENSP00000246548	0.044	0	0	0	0.091	0.992	0.9	0.945	0.999
RPL28	RPL18A	4450412	4433211	9606.ENSP00000452909	9606.ENSP00000222247	0	0	0	0	0.995	0.812	0.9	0.429	0.999
PSMB3	PSMD8	4451799	4432854	9606.ENSP00000483688	9606.ENSP00000215071	0	0	0	0	0.883	0.992	0.9	0.666	0.999
PSMB3	PSMD13	4451799	4447954	9606.ENSP00000483688	9606.ENSP00000396937	0	0	0	0	0.842	0.96	0.9	0.548	0.999
PTBP1	HNRNPA1	4441922	4441190	9606.ENSP00000349428	9606.ENSP00000341826	0	0	0	0	0.949	0.771	0.9	0.761	0.999
RPL28	RPL5	4450412	4443502	9606.ENSP00000452909	9606.ENSP00000359345	0	0	0	0	0.993	0.952	0.9	0.838	0.999
RPL30	RPL18A	4449429	4433211	9606.ENSP00000428085	9606.ENSP00000222247	0	0	0	0	0.993	0.992	0.9	0.579	0.999
UBE2I	SAE1	4441792	4435933	9606.ENSP00000348056	9606.ENSP00000270225	0.044	0	0	0	0.148	0.959	0.9	0.946	0.999
RPL18	RPS21	4450217	4441569	9606.ENSP00000447001	9606.ENSP00000345957	0	0	0	0	0.953	0.991	0.9	0.454	0.999
RPL27A	RPS9	4441578	4437909	9606.ENSP00000346015	9606.ENSP00000302896	0.167	0	0	0	0.992	0.992	0.9	0.921	0.999
RPL30	RPS9	4449429	4437909	9606.ENSP00000428085	9606.ENSP00000302896	0	0	0	0	0.978	0.992	0.9	0.707	0.999
COX2	COX5A	4442560	4439151	9606.ENSP00000354876	9606.ENSP00000317780	0	0	0	0	0.317	0.998	0.9	0.86	0.999
TSN	TSNAX	4445875	4442710	9606.ENSP00000374332	9606.ENSP00000355599	0	0	0	0.643	0.341	0.992	0.9	0.975	0.999
RPL18	RPL5	4450217	4443502	9606.ENSP00000447001	9606.ENSP00000359345	0	0	0	0	0.978	0.992	0.9	0.708	0.999
RPL28	RPS21	4450412	4441569	9606.ENSP00000452909	9606.ENSP00000345957	0	0	0	0	0.978	0.799	0.9	0.652	0.999
RPL18	RPL30	4450217	4449429	9606.ENSP00000447001	9606.ENSP00000428085	0.293	0	0	0	0.989	0.992	0.9	0.647	0.999
RPL28	RPL30	4450412	4449429	9606.ENSP00000452909	9606.ENSP00000428085	0	0	0	0	0.992	0.855	0.9	0.7	0.999
RPN1	RPN2	4437255	4433686	9606.ENSP00000296255	9606.ENSP00000237530	0	0	0	0	0.99	0.957	0.9	0.982	0.999
PSMB3	PSMD3	4451799	4435463	9606.ENSP00000483688	9606.ENSP00000264639	0	0	0	0	0.702	0.985	0.9	0.444	0.999
SAE1	SAE2	4435933	4433986	9606.ENSP00000270225	9606.ENSP00000246548	0	0	0	0.58	0.733	0.996	0.9	0.983	0.999
EIF4G1	EIF4B	4448822	4447567	9606.ENSP00000416255	9606.ENSP00000388806	0	0	0	0	0.694	0.834	0.9	0.944	0.999
PSMD3	PSMD7	4435463	4433080	9606.ENSP00000264639	9606.ENSP00000219313	0	0	0	0	0.895	0.991	0.9	0.897	0.999
RPL5	RPL18A	4443502	4433211	9606.ENSP00000359345	9606.ENSP00000222247	0	0	0	0	0.997	0.991	0.9	0.529	0.999
RPL28	RPS9	4450412	4437909	9606.ENSP00000452909	9606.ENSP00000302896	0	0	0	0	0.992	0.8	0.9	0.914	0.999
PSMD3	PSMD8	4435463	4432854	9606.ENSP00000264639	9606.ENSP00000215071	0	0	0	0	0.87	0.993	0.9	0.948	0.999
PSMD13	PSMD7	4447954	4433080	9606.ENSP00000396937	9606.ENSP00000219313	0	0	0	0	0.851	0.97	0.9	0.896	0.999
RPL30	RPS21	4449429	4441569	9606.ENSP00000428085	9606.ENSP00000345957	0	0	0	0	0.983	0.991	0.9	0.651	0.999
RHOA	ARHGDIA	4448110	4435881	9606.ENSP00000400175	9606.ENSP00000269321	0	0	0	0	0.092	0.969	0.9	0.887	0.999
RPS9	RPL18A	4437909	4433211	9606.ENSP00000302896	9606.ENSP00000222247	0	0	0	0	0.992	0.992	0.9	0.219	0.999
RPL18	RPL27A	4450217	4441578	9606.ENSP00000447001	9606.ENSP00000346015	0	0	0	0	0.993	0.991	0.9	0.464	0.999
RPL28	RPL18	4450412	4450217	9606.ENSP00000452909	9606.ENSP00000447001	0	0	0	0	0.993	0.812	0.9	0.732	0.999
RPL30	RPL27A	4449429	4441578	9606.ENSP00000428085	9606.ENSP00000346015	0	0	0.323	0	0.993	0.992	0.9	0.705	0.999
DDOST	RPN1	4448070	4437255	9606.ENSP00000399457	9606.ENSP00000296255	0	0	0	0	0.991	0.861	0.9	0.961	0.999
CYCS	COX5B	4438356	4434630	9606.ENSP00000307786	9606.ENSP00000258424	0	0	0	0	0.759	0.809	0.9	0.869	0.999
COX2	CYTB	4442560	4442489	9606.ENSP00000354876	9606.ENSP00000354554	0.295	0	0.415	0	0.964	0.782	0.9	0.945	0.999
DDOST	RPN2	4448070	4433686	9606.ENSP00000399457	9606.ENSP00000237530	0	0	0	0	0.992	0.858	0.9	0.962	0.999
RPL5	RPL27A	4443502	4441578	9606.ENSP00000359345	9606.ENSP00000346015	0.219	0	0	0	0.993	0.991	0.9	0.918	0.999
RPL5	RPS21	4443502	4441569	9606.ENSP00000359345	9606.ENSP00000345957	0	0	0	0	0.992	0.971	0.9	0.602	0.999
RPL18	RPL18A	4450217	4433211	9606.ENSP00000447001	9606.ENSP00000222247	0	0	0	0	0.996	0.991	0.9	0.437	0.999
RPS21	RPS9	4441569	4437909	9606.ENSP00000345957	9606.ENSP00000302896	0	0	0	0	0.948	0.964	0.9	0.389	0.999
RPL27A	RPS21	4441578	4441569	9606.ENSP00000346015	9606.ENSP00000345957	0	0	0	0	0.982	0.958	0.9	0.411	0.999
CDC42	ARHGDIA	4446990	4435881	9606.ENSP00000383118	9606.ENSP00000269321	0	0	0	0	0.175	0.881	0.9	0.883	0.998
CYTB	CYCS	4442489	4438356	9606.ENSP00000354554	9606.ENSP00000307786	0.295	0	0	0	0	0.736	0.9	0.935	0.998
TOM40	TOM70	4448548	4436581	9606.ENSP00000410339	9606.ENSP00000284320	0	0	0	0	0.153	0.84	0.9	0.916	0.998
COX5A	CYCS	4439151	4438356	9606.ENSP00000317780	9606.ENSP00000307786	0	0	0	0	0.688	0.796	0.9	0.718	0.997
CDC42	PAK2	4446990	4438909	9606.ENSP00000383118	9606.ENSP00000314067	0	0	0	0	0.064	0.853	0.9	0.845	0.997
COX2	CYCS	4442560	4438356	9606.ENSP00000354876	9606.ENSP00000307786	0.294	0	0	0	0.086	0.671	0.9	0.884	0.997
PGM2	PGM1	4445627	4443663	9606.ENSP00000371393	9606.ENSP00000360124	0.084	0	0	0	0.063	0.871	0.8	0.916	0.997
6PGD	6PGL	4435961	4434241	9606.ENSP00000270776	9606.ENSP00000252603	0.167	0.715	0.232	0	0.155	0	0.9	0.892	0.997
PPME1	PP2AA	4446811	4439716	9606.ENSP00000381461	9606.ENSP00000324804	0	0	0	0	0.063	0.872	0.9	0.768	0.996
EIF4G1	EIF3B	4448822	4442432	9606.ENSP00000416255	9606.ENSP00000354125	0	0	0	0	0.505	0.469	0.9	0.894	0.996
EIF3B	EIF3J	4442432	4434966	9606.ENSP00000354125	9606.ENSP00000261868	0	0	0	0	0.167	0.569	0.9	0.916	0.996
RBBP7	RBBP4	4445322	4444198	9606.ENSP00000369424	9606.ENSP00000362592	0	0	0	0.984	0.598	0.888	0.9	0.837	0.995
RPL30	RPN1	4449429	4437255	9606.ENSP00000428085	9606.ENSP00000296255	0	0	0	0	0.048	0.96	0.9	0.056	0.995
FPPS	MVD	4441886	4437707	9606.ENSP00000349078	9606.ENSP00000301012	0.076	0	0	0	0.571	0.047	0.9	0.896	0.995
EIF4B	EIF3B	4447567	4442432	9606.ENSP00000388806	9606.ENSP00000354125	0	0	0	0	0.734	0.342	0.9	0.775	0.995
PSME1	PSME2	4445713	4432984	9606.ENSP00000372155	9606.ENSP00000216802	0	0	0	0.911	0.771	0.817	0.9	0.902	0.995
HEXA	HEXB	4435803	4434873	9606.ENSP00000268097	9606.ENSP00000261416	0	0	0.448	0.955	0.102	0.939	0.9	0.863	0.994
CRTAP	P3H1	4439628	4433658	9606.ENSP00000323696	9606.ENSP00000236040	0	0	0	0.812	0.622	0.847	0.9	0.987	0.994
PTBP1	HNRNPD	4441922	4438847	9606.ENSP00000349428	9606.ENSP00000313199	0	0	0	0	0.217	0.817	0.9	0.585	0.993
PSMD7	PSMD5	4433080	4432839	9606.ENSP00000219313	9606.ENSP00000210313	0	0	0	0	0.092	0.813	0.9	0.614	0.992
RPL5	EIF3B	4443502	4442432	9606.ENSP00000359345	9606.ENSP00000354125	0	0	0	0	0.915	0	0.9	0.225	0.992
ILF3	ILF2	4448304	4442589	9606.ENSP00000404121	9606.ENSP00000355011	0	0	0	0.637	0.937	0.818	0	0.942	0.992
GSPT1	RPS21	4448014	4441569	9606.ENSP00000398131	9606.ENSP00000345957	0	0	0	0	0.219	0.886	0.9	0.109	0.991
PSMD8	PSMD5	4432854	4432839	9606.ENSP00000215071	9606.ENSP00000210313	0	0	0	0	0.081	0.869	0.9	0.29	0.99
PDXK	PNPO	4436919	4433322	9606.ENSP00000291565	9606.ENSP00000225573	0.172	0	0	0	0.07	0	0.9	0.89	0.99
PSMD3	PSMD5	4435463	4432839	9606.ENSP00000264639	9606.ENSP00000210313	0	0	0	0	0.085	0.826	0.9	0.465	0.99
GSPT1	RPS9	4448014	4437909	9606.ENSP00000398131	9606.ENSP00000302896	0	0	0	0	0.124	0.871	0.9	0.074	0.988
RAB7A	RAB11A	4435545	4434975	9606.ENSP00000265062	9606.ENSP00000261890	0	0	0.442	0.857	0.086	0.863	0.9	0.933	0.988
RAB2A	RAB11A	4435120	4434975	9606.ENSP00000262646	9606.ENSP00000261890	0	0	0.437	0.921	0.064	0.872	0.9	0.737	0.988
UBE2N	UBA6	4439045	4438864	9606.ENSP00000316176	9606.ENSP00000313454	0.044	0	0	0	0.179	0.717	0.9	0.558	0.988
HNRNPA1	SNRPD1	4441190	4437667	9606.ENSP00000341826	9606.ENSP00000300413	0	0	0	0	0.75	0.48	0.9	0.246	0.988
PSMB3	PSMD5	4451799	4432839	9606.ENSP00000483688	9606.ENSP00000210313	0	0	0	0	0.105	0.873	0.9	0.05	0.987
TOM40	VDAC1	4448548	4435583	9606.ENSP00000410339	9606.ENSP00000265333	0	0	0	0	0.115	0.458	0.9	0.776	0.987
PSMD13	PSMD5	4447954	4432839	9606.ENSP00000396937	9606.ENSP00000210313	0	0	0	0	0.063	0.813	0.9	0.383	0.987
PSMB3	PSME2	4451799	4432984	9606.ENSP00000483688	9606.ENSP00000216802	0	0	0	0	0.196	0.823	0.9	0.251	0.987
EIF3B	RPS9	4442432	4437909	9606.ENSP00000354125	9606.ENSP00000302896	0	0	0	0	0.758	0.414	0.9	0.249	0.987
RHOA	EZR	4448110	4442801	9606.ENSP00000400175	9606.ENSP00000356042	0	0	0	0	0.068	0.557	0.9	0.71	0.986
UBA6	UBE2K	4438864	4434874	9606.ENSP00000313454	9606.ENSP00000261427	0.044	0	0	0	0.084	0.515	0.9	0.739	0.986
PSMD7	PSME2	4433080	4432984	9606.ENSP00000219313	9606.ENSP00000216802	0	0	0	0	0.134	0.817	0.9	0.247	0.986
RAB1B	RAB11A	4438570	4434975	9606.ENSP00000310226	9606.ENSP00000261890	0	0	0.444	0.928	0.121	0.84	0.9	0.709	0.986
TNPO1	HNRNPD	4440721	4438847	9606.ENSP00000336712	9606.ENSP00000313199	0	0	0	0	0.067	0.974	0	0.454	0.985
HNRNPA1	HNRNPD	4441190	4438847	9606.ENSP00000341826	9606.ENSP00000313199	0	0	0	0.814	0.317	0.771	0.9	0.688	0.985
PSMB3	PSME1	4451799	4445713	9606.ENSP00000483688	9606.ENSP00000372155	0	0	0	0	0.12	0.827	0.9	0.142	0.985
ILF2	HNRNPA1	4442589	4441190	9606.ENSP00000355011	9606.ENSP00000341826	0	0	0	0	0.941	0.532	0	0.512	0.985
UBE2N	UBE2K	4439045	4434874	9606.ENSP00000316176	9606.ENSP00000261427	0	0	0	0.912	0.154	0.812	0.9	0.866	0.984
EIF3B	RPS21	4442432	4441569	9606.ENSP00000354125	9606.ENSP00000345957	0	0	0	0	0.344	0.771	0.9	0	0.983
RPL5	RPN1	4443502	4437255	9606.ENSP00000359345	9606.ENSP00000296255	0	0	0	0	0.083	0.795	0.9	0.219	0.983
TYMP	UMPS	4446438	4433563	9606.ENSP00000379038	9606.ENSP00000232607	0.143	0	0	0	0	0	0.9	0.821	0.983
EIF3B	RPL27A	4442432	4441578	9606.ENSP00000354125	9606.ENSP00000346015	0	0	0	0	0.81	0	0.9	0.104	0.981
TSPO	VDAC1	4446523	4435583	9606.ENSP00000379563	9606.ENSP00000265333	0	0	0	0	0	0.554	0.8	0.808	0.981
YBX1	SNRPD1	4443961	4437667	9606.ENSP00000361626	9606.ENSP00000300413	0	0	0	0	0.098	0.811	0.9	0.06	0.981
RPL27A	RPN1	4441578	4437255	9606.ENSP00000346015	9606.ENSP00000296255	0	0	0	0	0.067	0.809	0.9	0	0.98
GNAI3	GNAI2	4443410	4438833	9606.ENSP00000358867	9606.ENSP00000312999	0	0	0	0.983	0.057	0.809	0.9	0.847	0.98
RPN1	RPL18A	4437255	4433211	9606.ENSP00000296255	9606.ENSP00000222247	0	0	0	0	0.077	0.809	0.9	0	0.98
RHOA	RTN4	4448110	4440824	9606.ENSP00000400175	9606.ENSP00000337838	0	0	0	0	0.128	0.103	0.9	0.778	0.98
EIF4G1	EIF3J	4448822	4434966	9606.ENSP00000416255	9606.ENSP00000261868	0	0	0	0	0.082	0.336	0.9	0.696	0.979
PRDX5	PRDX1	4435610	4435133	9606.ENSP00000265462	9606.ENSP00000262746	0	0	0	0	0.154	0.873	0	0.817	0.978
RPL18	EIF3B	4450217	4442432	9606.ENSP00000447001	9606.ENSP00000354125	0	0	0	0	0.777	0.05	0.9	0.123	0.978
TOM70	VDAC1	4436581	4435583	9606.ENSP00000284320	9606.ENSP00000265333	0	0	0	0	0.15	0.094	0.9	0.749	0.978
PARP1	XRCC6	4442743	4442230	9606.ENSP00000355759	9606.ENSP00000352257	0	0	0	0	0.115	0.858	0	0.84	0.978
PTBP1	SNRPD1	4441922	4437667	9606.ENSP00000349428	9606.ENSP00000300413	0	0	0	0	0.721	0	0.9	0.273	0.977
YBX1	HNRNPD	4443961	4438847	9606.ENSP00000361626	9606.ENSP00000313199	0	0	0	0	0.103	0.336	0.9	0.667	0.977
UBE2I	UBE2K	4441792	4434874	9606.ENSP00000348056	9606.ENSP00000261427	0	0	0	0.769	0.062	0.971	0	0.726	0.976
PRDX2	PRDX5	4437770	4435610	9606.ENSP00000301522	9606.ENSP00000265462	0	0	0	0	0.16	0.874	0	0.794	0.976
EIF4B	RPS9	4447567	4437909	9606.ENSP00000388806	9606.ENSP00000302896	0	0	0	0	0.091	0.732	0.9	0.111	0.975
ILF3	HNRNPA1	4448304	4441190	9606.ENSP00000404121	9606.ENSP00000341826	0	0	0	0	0.94	0.202	0	0.49	0.973
ANP32A	NME1	4448935	4440758	9606.ENSP00000417864	9606.ENSP00000337060	0	0	0	0	0.128	0	0.9	0.719	0.973
RPL18	RPN1	4450217	4437255	9606.ENSP00000447001	9606.ENSP00000296255	0	0	0	0	0.075	0.736	0.9	0	0.973
STRAP	SNRPD1	4447735	4437667	9606.ENSP00000392270	9606.ENSP00000300413	0	0	0	0	0.163	0.328	0.9	0.575	0.972
PLOD2	PLOD1	4436514	4432760	9606.ENSP00000282903	9606.ENSP00000196061	0	0	0	0.965	0.083	0.719	0.9	0.815	0.972
RPL28	RPN1	4450412	4437255	9606.ENSP00000452909	9606.ENSP00000296255	0	0	0	0	0.069	0.731	0.9	0	0.972
EIF3B	RPL18A	4442432	4433211	9606.ENSP00000354125	9606.ENSP00000222247	0	0	0	0	0.731	0	0.9	0	0.972
CMPK1	UMPS	4443829	4433563	9606.ENSP00000360939	9606.ENSP00000232607	0	0	0	0	0.064	0	0.9	0.733	0.972
RBBP4	NASP	4444198	4434413	9606.ENSP00000362592	9606.ENSP00000255120	0	0	0	0	0.459	0.89	0	0.572	0.972
RHOA	CD44	4448110	4448037	9606.ENSP00000400175	9606.ENSP00000398632	0	0	0	0	0.061	0	0.9	0.719	0.971
TCTP	RPL30	4451239	4449429	9606.ENSP00000477781	9606.ENSP00000428085	0	0	0	0	0.969	0	0	0.113	0.971
IPO7	IPO9	4445263	4442535	9606.ENSP00000369042	9606.ENSP00000354742	0	0	0	0	0.082	0.838	0	0.825	0.971
RPL28	EIF3B	4450412	4442432	9606.ENSP00000452909	9606.ENSP00000354125	0	0	0	0	0.727	0	0.9	0	0.971
RPL30	EIF3B	4449429	4442432	9606.ENSP00000428085	9606.ENSP00000354125	0	0	0	0	0.667	0	0.9	0.212	0.971
IPO9	TNPO1	4442535	4440721	9606.ENSP00000354742	9606.ENSP00000336712	0	0	0	0	0.089	0.873	0	0.762	0.97
ILF3	PTBP1	4448304	4441922	9606.ENSP00000404121	9606.ENSP00000349428	0	0	0	0	0.945	0	0	0.477	0.97
HNRNPA1	DHX15	4441190	4440727	9606.ENSP00000341826	9606.ENSP00000336741	0	0	0	0	0.47	0.383	0.9	0.216	0.97
STK26	EZR	4446263	4442801	9606.ENSP00000377867	9606.ENSP00000356042	0	0	0	0	0.061	0	0.9	0.699	0.969
EIF4G1	PTBP1	4448822	4441922	9606.ENSP00000416255	9606.ENSP00000349428	0	0	0	0	0.179	0.217	0.9	0.54	0.966
YBX1	HNRNPA1	4443961	4441190	9606.ENSP00000361626	9606.ENSP00000341826	0	0	0	0	0.253	0.157	0.9	0.523	0.966
LA	PTBP1	4447403	4441922	9606.ENSP00000386636	9606.ENSP00000349428	0	0	0	0	0.932	0	0	0.532	0.966
UBE2I	NUCL	4441792	4433937	9606.ENSP00000348056	9606.ENSP00000245544	0	0	0	0	0.091	0.581	0.9	0.211	0.965
EIF4B	EIF3J	4447567	4434966	9606.ENSP00000388806	9606.ENSP00000261868	0	0	0	0	0.108	0	0.9	0.629	0.964
ILF2	PTBP1	4442589	4441922	9606.ENSP00000355011	9606.ENSP00000349428	0	0	0	0	0.939	0.207	0	0.327	0.964
ARF1	RAB1B	4449926	4438570	9606.ENSP00000440005	9606.ENSP00000310226	0	0	0	0.661	0.23	0.463	0.9	0.641	0.964
ARF1	RAB11A	4449926	4434975	9606.ENSP00000440005	9606.ENSP00000261890	0	0	0	0	0.083	0.888	0	0.665	0.962
IPO7	TNPO1	4445263	4440721	9606.ENSP00000369042	9606.ENSP00000336712	0	0	0	0	0.215	0.843	0	0.71	0.961
CTPS1	IMPDH1	4443980	4441488	9606.ENSP00000361704	9606.ENSP00000345096	0.07	0	0	0	0.519	0.812	0	0.587	0.96
GSPT1	RPL5	4448014	4443502	9606.ENSP00000398131	9606.ENSP00000359345	0	0	0	0	0.493	0.262	0.9	0.067	0.96
TMED7	TMED9	4448382	4440219	9606.ENSP00000405926	9606.ENSP00000330945	0	0	0	0.716	0.162	0.464	0.9	0.685	0.96
RAB1B	RAB7A	4438570	4435545	9606.ENSP00000310226	9606.ENSP00000265062	0	0	0.439	0.855	0.284	0.39	0.9	0.776	0.96
PTBP1	DHX15	4441922	4440727	9606.ENSP00000349428	9606.ENSP00000336741	0	0	0	0	0.534	0	0.9	0.174	0.958
CDC42	SYK	4446990	4444619	9606.ENSP00000383118	9606.ENSP00000364907	0	0	0	0	0.064	0.16	0.9	0.513	0.956
VAPB	VAPA	4448871	4441538	9606.ENSP00000417175	9606.ENSP00000345656	0	0	0	0.956	0.061	0.561	0.9	0.885	0.956
ACTN1	EZR	4446270	4442801	9606.ENSP00000377941	9606.ENSP00000356042	0	0	0	0	0.062	0.401	0.9	0.316	0.956
DHX15	SNRPD1	4440727	4437667	9606.ENSP00000336741	9606.ENSP00000300413	0	0	0	0	0.359	0.186	0.9	0.24	0.955
YBX1	PTBP1	4443961	4441922	9606.ENSP00000361626	9606.ENSP00000349428	0	0	0	0	0.176	0.14	0.9	0.442	0.955
GPX1	GSS	4448449	4432990	9606.ENSP00000407375	9606.ENSP00000216951	0	0	0	0	0.061	0	0.9	0.55	0.954
RAB7A	RAB2A	4435545	4435120	9606.ENSP00000265062	9606.ENSP00000262646	0	0	0.427	0.85	0.108	0.419	0.9	0.808	0.953
LA	HNRNPA1	4447403	4441190	9606.ENSP00000386636	9606.ENSP00000341826	0	0	0	0	0.912	0.078	0	0.462	0.953
EIF4G1	GSPT1	4448822	4448014	9606.ENSP00000416255	9606.ENSP00000398131	0	0	0	0	0.355	0.052	0.9	0.323	0.953
RAB1B	RAB2A	4438570	4435120	9606.ENSP00000310226	9606.ENSP00000262646	0	0	0.439	0.927	0.113	0.463	0.9	0.672	0.952
GSPT1	RPL18A	4448014	4433211	9606.ENSP00000398131	9606.ENSP00000222247	0	0	0	0	0.263	0.406	0.9	0	0.952
CDC42	NME1	4446990	4440758	9606.ENSP00000383118	9606.ENSP00000337060	0	0	0	0	0	0	0.9	0.544	0.952
PGM1	ALDOC	4443663	4433361	9606.ENSP00000360124	9606.ENSP00000226253	0	0	0	0	0.227	0.052	0.9	0.408	0.95
CDK1	PP2AA	4446389	4439716	9606.ENSP00000378699	9606.ENSP00000324804	0	0	0	0	0.062	0.393	0.9	0.236	0.95
GSPT1	RPL27A	4448014	4441578	9606.ENSP00000398131	9606.ENSP00000346015	0	0	0	0	0.15	0.377	0.9	0.176	0.95
DHX15	HNRNPD	4440727	4438847	9606.ENSP00000336741	9606.ENSP00000313199	0	0	0	0	0.319	0.185	0.9	0.19	0.949
CYTB	COX5B	4442489	4434630	9606.ENSP00000354554	9606.ENSP00000258424	0	0	0	0	0	0.777	0.54	0.544	0.949
RHOA	SYK	4448110	4444619	9606.ENSP00000400175	9606.ENSP00000364907	0	0	0	0	0	0.16	0.9	0.441	0.948
PARP1	UBE2I	4442743	4441792	9606.ENSP00000355759	9606.ENSP00000348056	0	0	0	0	0.064	0.379	0.9	0.215	0.948
EIF4G1	RPL5	4448822	4443502	9606.ENSP00000416255	9606.ENSP00000359345	0	0	0	0	0.303	0	0.9	0.3	0.947
CMPK1	NME1	4443829	4440758	9606.ENSP00000360939	9606.ENSP00000337060	0	0	0	0	0.064	0	0.9	0.485	0.947
RPL30	GSPT1	4449429	4448014	9606.ENSP00000428085	9606.ENSP00000398131	0.148	0	0	0	0.162	0.356	0.9	0.042	0.947
RPL5	PA2G4	4443502	4437907	9606.ENSP00000359345	9606.ENSP00000302886	0.154	0	0	0	0.747	0.687	0	0.298	0.946
CD44	CDC42	4448037	4446990	9606.ENSP00000398632	9606.ENSP00000383118	0	0	0	0	0	0	0.9	0.491	0.946
HNRNPD	SNRPD1	4438847	4437667	9606.ENSP00000313199	9606.ENSP00000300413	0	0	0	0	0.138	0.314	0.9	0.184	0.945
PP2AA	RAB11A	4439716	4434975	9606.ENSP00000324804	9606.ENSP00000261890	0	0	0	0	0.141	0.402	0.9	0.057	0.945
PARK7	UBE2I	4448989	4441792	9606.ENSP00000418770	9606.ENSP00000348056	0	0	0	0	0.093	0.32	0.9	0.222	0.945
XRCC6	UBE2N	4442230	4439045	9606.ENSP00000352257	9606.ENSP00000316176	0	0	0	0	0.079	0	0.9	0.442	0.944
RAB14	RAB1B	4444272	4438570	9606.ENSP00000362946	9606.ENSP00000310226	0	0	0.44	0.913	0.317	0.193	0.9	0.563	0.944
RPL18	GSPT1	4450217	4448014	9606.ENSP00000447001	9606.ENSP00000398131	0	0	0	0	0.198	0.342	0.9	0.062	0.943
PARK7	PRDX2	4448989	4437770	9606.ENSP00000418770	9606.ENSP00000301522	0.07	0	0	0	0.142	0.84	0	0.609	0.943
TCTP	RPL5	4451239	4443502	9606.ENSP00000477781	9606.ENSP00000359345	0	0	0	0	0.939	0.05	0	0.082	0.942
ADK	SAHH	4436683	4433021	9606.ENSP00000286621	9606.ENSP00000217426	0.135	0	0	0	0.389	0.28	0	0.863	0.941
EIF4B	RPL5	4447567	4443502	9606.ENSP00000388806	9606.ENSP00000359345	0	0	0	0	0.299	0	0.9	0.228	0.941
RAB14	RAB7A	4444272	4435545	9606.ENSP00000362946	9606.ENSP00000265062	0	0	0.426	0.826	0.199	0.154	0.9	0.825	0.941
RBBP7	CBX3	4445322	4440717	9606.ENSP00000369424	9606.ENSP00000336687	0	0	0	0	0.22	0.13	0.9	0.223	0.94
RHOA	CDC42	4448110	4446990	9606.ENSP00000400175	9606.ENSP00000383118	0	0	0.418	0.95	0.267	0.186	0.9	0.96	0.939
CDC42	GNAI2	4446990	4438833	9606.ENSP00000383118	9606.ENSP00000312999	0	0	0	0	0.249	0.185	0.9	0.128	0.939
RBBP4	CBX3	4444198	4440717	9606.ENSP00000362592	9606.ENSP00000336687	0	0	0	0	0.179	0.185	0.9	0.203	0.939
SNRPN	HNRNPA1	4446975	4441190	9606.ENSP00000382972	9606.ENSP00000341826	0	0	0	0	0.065	0.309	0.9	0.155	0.938
EIF4B	RPL27A	4447567	4441578	9606.ENSP00000388806	9606.ENSP00000346015	0	0	0	0	0.119	0.263	0.9	0.158	0.938
CTPS1	NME1	4443980	4440758	9606.ENSP00000361704	9606.ENSP00000337060	0.058	0	0	0	0.253	0	0.9	0.206	0.936
PSME1	PAK2	4445713	4438909	9606.ENSP00000372155	9606.ENSP00000314067	0	0	0	0	0.053	0.379	0.9	0	0.936
TCTP	RPL18A	4451239	4433211	9606.ENSP00000477781	9606.ENSP00000222247	0	0	0	0	0.932	0	0	0.09	0.936
RHOA	ACTN1	4448110	4446270	9606.ENSP00000400175	9606.ENSP00000377941	0	0	0	0	0.062	0.063	0.9	0.352	0.935
NQO1	ADK	4439310	4436683	9606.ENSP00000319788	9606.ENSP00000286621	0	0	0	0	0	0.869	0	0.527	0.935
PSME2	PSMD8	4432984	4432854	9606.ENSP00000216802	9606.ENSP00000215071	0	0	0	0	0.16	0	0.9	0.288	0.935
RAB7A	RAB21	4435545	4434846	9606.ENSP00000265062	9606.ENSP00000261263	0	0	0.384	0.814	0.203	0	0.9	0.84	0.934
RPL28	GSPT1	4450412	4448014	9606.ENSP00000452909	9606.ENSP00000398131	0	0	0	0	0.17	0.263	0.9	0.058	0.934
CALU	NUCB1	4449856	4447288	9606.ENSP00000438248	9606.ENSP00000385923	0	0	0	0	0.08	0	0.9	0.347	0.934
RTN4	ARHGDIA	4440824	4435881	9606.ENSP00000337838	9606.ENSP00000269321	0	0	0	0	0.061	0	0.9	0.357	0.934
SNRPN	DHX15	4446975	4440727	9606.ENSP00000382972	9606.ENSP00000336741	0	0	0	0	0.063	0.319	0.9	0.09	0.934
PSME1	PSMD8	4445713	4432854	9606.ENSP00000372155	9606.ENSP00000215071	0	0	0	0	0.107	0	0.9	0.329	0.934
UBA5	UBE2N	4441844	4439045	9606.ENSP00000348565	9606.ENSP00000316176	0.044	0	0	0	0.077	0.262	0.9	0.136	0.933
RHOA	GNAI2	4448110	4438833	9606.ENSP00000400175	9606.ENSP00000312999	0	0	0	0	0.139	0.185	0.9	0.166	0.933
CDK1	PSMD7	4446389	4433080	9606.ENSP00000378699	9606.ENSP00000219313	0	0	0	0	0.091	0.303	0.9	0.071	0.933
CDK1	CDK6	4446389	4435642	9606.ENSP00000378699	9606.ENSP00000265734	0	0	0.425	0.923	0.154	0.185	0.9	0.864	0.932
VPS35	RAB7A	4437537	4435545	9606.ENSP00000299138	9606.ENSP00000265062	0	0	0	0	0.096	0.52	0	0.856	0.932
PSME1	PSMD7	4445713	4433080	9606.ENSP00000372155	9606.ENSP00000219313	0	0	0	0	0.103	0	0.9	0.307	0.932
PP2AA	RPL18A	4439716	4433211	9606.ENSP00000324804	9606.ENSP00000222247	0	0	0	0	0.184	0.185	0.9	0.091	0.931
CDC42	GNAI3	4446990	4443410	9606.ENSP00000383118	9606.ENSP00000358867	0	0	0	0	0.064	0.185	0.9	0.201	0.931
SNRPN	HNRNPD	4446975	4438847	9606.ENSP00000382972	9606.ENSP00000313199	0	0	0	0	0	0.309	0.9	0.085	0.931
RPL30	EIF4B	4449429	4447567	9606.ENSP00000428085	9606.ENSP00000388806	0	0	0	0	0.159	0	0.9	0.24	0.93
ACTN1	TPM3	4446270	4443118	9606.ENSP00000377941	9606.ENSP00000357516	0	0	0	0	0.245	0.832	0	0.494	0.93
SNRPD1	NUCL	4437667	4433937	9606.ENSP00000300413	9606.ENSP00000245544	0	0	0	0	0.098	0	0.9	0.294	0.93
UBA5	UBE2K	4441844	4434874	9606.ENSP00000348565	9606.ENSP00000261427	0.044	0	0	0	0.098	0.262	0.9	0.068	0.929
CYTB	COX5A	4442489	4439151	9606.ENSP00000354554	9606.ENSP00000317780	0	0	0	0	0	0.735	0.54	0.468	0.929
CAND1	FBX22	4450029	4438360	9606.ENSP00000442318	9606.ENSP00000307833	0	0	0	0	0.046	0	0.9	0.308	0.928
FTH1	ALDOC	4436083	4433361	9606.ENSP00000273550	9606.ENSP00000226253	0.065	0	0	0	0.062	0.051	0.9	0.275	0.928
RAB11A	RALA	4434975	4432558	9606.ENSP00000261890	9606.ENSP00000005257	0	0	0.436	0.791	0.122	0.099	0.9	0.463	0.928
SRPRB	RPN1	4448962	4437255	9606.ENSP00000418401	9606.ENSP00000296255	0	0	0	0	0.165	0	0.9	0.2	0.927
UBA5	UBA6	4441844	4438864	9606.ENSP00000348565	9606.ENSP00000313454	0	0	0	0.561	0.099	0	0.9	0.548	0.927
RAB14	RAB2A	4444272	4435120	9606.ENSP00000362946	9606.ENSP00000262646	0	0	0.441	0.956	0.259	0	0.9	0.79	0.926
RPL27A	PP2AA	4441578	4439716	9606.ENSP00000346015	9606.ENSP00000324804	0	0	0	0	0.29	0	0.9	0	0.926
RPL28	EIF4G1	4450412	4448822	9606.ENSP00000452909	9606.ENSP00000416255	0	0	0	0	0.145	0	0.9	0.213	0.926
RPL18	EIF4B	4450217	4447567	9606.ENSP00000447001	9606.ENSP00000388806	0	0	0	0	0.081	0	0.9	0.268	0.926
PSMD3	RPN2	4435463	4433686	9606.ENSP00000264639	9606.ENSP00000237530	0	0	0	0	0.136	0	0.9	0.222	0.926
TCTP	RPL27A	4451239	4441578	9606.ENSP00000477781	9606.ENSP00000346015	0	0	0	0	0.925	0	0	0.057	0.926
IMPDH1	PA2G4	4441488	4437907	9606.ENSP00000345096	9606.ENSP00000302886	0.068	0	0	0	0.235	0	0.9	0.085	0.926
PSMB3	PP2AA	4451799	4439716	9606.ENSP00000483688	9606.ENSP00000324804	0	0	0	0	0.174	0.185	0.9	0	0.926
PA2G4	RPL18A	4437907	4433211	9606.ENSP00000302886	9606.ENSP00000222247	0	0	0	0	0.668	0.773	0	0.087	0.925
EIF4B	RPL18A	4447567	4433211	9606.ENSP00000388806	9606.ENSP00000222247	0	0	0	0	0.211	0.064	0.9	0.11	0.925
RHOA	GNAI3	4448110	4443410	9606.ENSP00000400175	9606.ENSP00000358867	0	0	0	0	0.114	0.185	0.9	0.086	0.925
RPL30	PP2AA	4449429	4439716	9606.ENSP00000428085	9606.ENSP00000324804	0	0	0	0	0.233	0	0.9	0.108	0.925
EIF4G1	RPS21	4448822	4441569	9606.ENSP00000416255	9606.ENSP00000345957	0	0	0	0	0.274	0	0.9	0.057	0.925
UBE2I	UBE2N	4441792	4439045	9606.ENSP00000348056	9606.ENSP00000316176	0	0	0	0.814	0.144	0	0.9	0.83	0.924
PSME2	PSMD5	4432984	4432839	9606.ENSP00000216802	9606.ENSP00000210313	0	0	0	0	0.061	0	0.9	0.257	0.924
TCTP	RPL28	4451239	4450412	9606.ENSP00000477781	9606.ENSP00000452909	0	0	0	0	0.922	0	0	0.053	0.923
FBXO2	UBE2K	4441603	4434874	9606.ENSP00000346240	9606.ENSP00000261427	0	0	0	0	0	0	0.9	0.267	0.923
RPL28	PP2AA	4450412	4439716	9606.ENSP00000452909	9606.ENSP00000324804	0	0	0	0	0.27	0	0.9	0	0.923
PARP1	UBE2N	4442743	4439045	9606.ENSP00000355759	9606.ENSP00000316176	0	0	0	0	0.089	0	0.9	0.22	0.922
RAB11A	RAB21	4434975	4434846	9606.ENSP00000261890	9606.ENSP00000261263	0	0	0.401	0.849	0.113	0	0.9	0.75	0.922
NUCB1	RCN1	4447288	4432636	9606.ENSP00000385923	9606.ENSP00000054950	0	0	0	0	0.063	0	0.9	0.243	0.922
TCTP	RPS9	4451239	4437909	9606.ENSP00000477781	9606.ENSP00000302896	0	0	0	0	0.922	0	0	0	0.922
PSME1	PSMD5	4445713	4432839	9606.ENSP00000372155	9606.ENSP00000210313	0	0	0	0	0.046	0	0.9	0.256	0.922
RAB14	RALA	4444272	4432558	9606.ENSP00000362946	9606.ENSP00000005257	0	0	0.434	0.786	0.148	0	0.9	0.191	0.921
PARK7	PRDX5	4448989	4435610	9606.ENSP00000418770	9606.ENSP00000265462	0	0	0	0	0.138	0.864	0	0.379	0.921
RPL18	EIF4G1	4450217	4448822	9606.ENSP00000447001	9606.ENSP00000416255	0	0	0	0	0.099	0	0.9	0.202	0.921
RPS21	PP2AA	4441569	4439716	9606.ENSP00000345957	9606.ENSP00000324804	0	0	0	0	0.169	0	0.9	0.128	0.921
RAB14	RAB21	4444272	4434846	9606.ENSP00000362946	9606.ENSP00000261263	0	0	0.402	0.855	0.092	0	0.9	0.859	0.921
EIF4G1	RPL18A	4448822	4433211	9606.ENSP00000416255	9606.ENSP00000222247	0	0	0	0	0.234	0	0.9	0.062	0.921
RAB2A	RAB21	4435120	4434846	9606.ENSP00000262646	9606.ENSP00000261263	0	0	0.377	0.857	0.123	0	0.9	0.688	0.921
TCPZ	CDC37	4436191	4433199	9606.ENSP00000275603	9606.ENSP00000222005	0	0	0	0	0.201	0	0.9	0.093	0.921
RBBP7	NASP	4445322	4434413	9606.ENSP00000369424	9606.ENSP00000255120	0	0	0	0	0.486	0.535	0	0.697	0.921
RPL27A	EIF3J	4441578	4434966	9606.ENSP00000346015	9606.ENSP00000261868	0	0	0	0	0.105	0	0.9	0.195	0.921
PP2AA	RPS9	4439716	4437909	9606.ENSP00000324804	9606.ENSP00000302896	0	0	0	0	0.237	0	0.9	0	0.92
CDK1	PSMD8	4446389	4432854	9606.ENSP00000378699	9606.ENSP00000215071	0	0	0	0	0.079	0.192	0.9	0.057	0.92
PGM2	ADPGK	4445627	4438764	9606.ENSP00000371393	9606.ENSP00000312250	0	0	0	0	0.065	0	0.9	0.219	0.92
RPL5	PP2AA	4443502	4439716	9606.ENSP00000359345	9606.ENSP00000324804	0	0	0	0	0.189	0	0.9	0.1	0.92
RPL18	PP2AA	4450217	4439716	9606.ENSP00000447001	9606.ENSP00000324804	0	0	0	0	0.233	0	0.9	0.049	0.92
CDK1	PSMD5	4446389	4432839	9606.ENSP00000378699	9606.ENSP00000210313	0	0	0	0	0	0	0.9	0.229	0.919
CDK1	NUCL	4446389	4433937	9606.ENSP00000378699	9606.ENSP00000245544	0	0	0	0	0.193	0.052	0.9	0.074	0.919
CDK1	RAB11A	4446389	4434975	9606.ENSP00000378699	9606.ENSP00000261890	0	0	0	0	0.063	0.095	0.9	0.154	0.918
RAB1B	RAB21	4438570	4434846	9606.ENSP00000310226	9606.ENSP00000261263	0	0	0.407	0.878	0.111	0.05	0.9	0.583	0.918
RAB1B	LMAN2	4438570	4437954	9606.ENSP00000310226	9606.ENSP00000303366	0	0	0	0	0.095	0	0.9	0.158	0.917
PSMB3	PAK2	4451799	4438909	9606.ENSP00000483688	9606.ENSP00000314067	0	0	0	0	0.169	0.085	0.9	0	0.917
DDOST	VAPA	4448070	4441538	9606.ENSP00000399457	9606.ENSP00000345656	0	0	0	0	0.108	0.058	0.9	0.132	0.917
PLOD3	PLOD1	4433268	4432760	9606.ENSP00000223127	9606.ENSP00000196061	0	0	0	0.964	0.184	0	0.9	0.834	0.917
PSME1	PSMD3	4445713	4435463	9606.ENSP00000372155	9606.ENSP00000264639	0	0	0	0	0.042	0	0.9	0.198	0.916
ARF1	TMED9	4449926	4440219	9606.ENSP00000440005	9606.ENSP00000330945	0	0	0	0	0.154	0	0.9	0.086	0.916
PSMD13	PSME2	4447954	4432984	9606.ENSP00000396937	9606.ENSP00000216802	0	0	0	0	0.064	0	0.9	0.182	0.916
SRPRB	RPN2	4448962	4433686	9606.ENSP00000418401	9606.ENSP00000237530	0	0	0	0	0.193	0	0.9	0	0.915
PSMB3	RPN1	4451799	4437255	9606.ENSP00000483688	9606.ENSP00000296255	0	0	0	0	0.183	0	0.9	0.041	0.914
RPL28	EIF4B	4450412	4447567	9606.ENSP00000452909	9606.ENSP00000388806	0	0	0	0	0.129	0	0.9	0.099	0.914
SRPRB	DDOST	4448962	4448070	9606.ENSP00000418401	9606.ENSP00000399457	0	0	0	0	0.176	0	0.9	0	0.914
RPL30	EIF4G1	4449429	4448822	9606.ENSP00000428085	9606.ENSP00000416255	0	0	0	0	0.109	0.042	0.9	0.11	0.913
CDC42	PP2AA	4446990	4439716	9606.ENSP00000383118	9606.ENSP00000324804	0	0	0	0	0.062	0.056	0.9	0.136	0.913
EIF4G1	RPL27A	4448822	4441578	9606.ENSP00000416255	9606.ENSP00000346015	0	0	0	0	0.153	0	0.9	0.056	0.913
PSMD13	PSME1	4447954	4445713	9606.ENSP00000396937	9606.ENSP00000372155	0	0	0	0	0.064	0	0.9	0.146	0.913
RPL18	DDOST	4450217	4448070	9606.ENSP00000447001	9606.ENSP00000399457	0	0	0	0	0.134	0	0.9	0.079	0.913
CYCS	VDAC1	4438356	4435583	9606.ENSP00000307786	9606.ENSP00000265333	0	0	0	0	0.204	0.404	0	0.831	0.912
RAB14	RAB11A	4444272	4434975	9606.ENSP00000362946	9606.ENSP00000261890	0	0	0.438	0.916	0.078	0	0.9	0.734	0.912
EIF4G1	RPS9	4448822	4437909	9606.ENSP00000416255	9606.ENSP00000302896	0	0	0	0	0.133	0.05	0.9	0.064	0.912
ARF1	TMED7	4449926	4448382	9606.ENSP00000440005	9606.ENSP00000405926	0	0	0	0	0.09	0	0.9	0.112	0.912
PP2AA	PSMD8	4439716	4432854	9606.ENSP00000324804	9606.ENSP00000215071	0	0	0	0	0.154	0	0.9	0	0.911
EIF4G1	PP2AA	4448822	4439716	9606.ENSP00000416255	9606.ENSP00000324804	0	0	0	0	0.107	0	0.9	0.084	0.911
TMED9	RAB1B	4440219	4438570	9606.ENSP00000330945	9606.ENSP00000310226	0	0	0	0	0.135	0	0.9	0.05	0.91
GSPT1	PP2AA	4448014	4439716	9606.ENSP00000398131	9606.ENSP00000324804	0	0	0	0	0.071	0.107	0.9	0.049	0.91
CALU	RCN1	4449856	4432636	9606.ENSP00000438248	9606.ENSP00000054950	0	0	0	0.959	0.125	0	0.9	0.474	0.91
CDK1	PSMD3	4446389	4435463	9606.ENSP00000378699	9606.ENSP00000264639	0	0	0	0	0.061	0.087	0.9	0.082	0.91
YBX1	DHX15	4443961	4440727	9606.ENSP00000361626	9606.ENSP00000336741	0	0	0	0	0.089	0.08	0.9	0.063	0.91
RPN2	RPL18A	4433686	4433211	9606.ENSP00000237530	9606.ENSP00000222247	0	0	0	0	0.138	0	0.9	0	0.91
PP2AA	PSMD3	4439716	4435463	9606.ENSP00000324804	9606.ENSP00000264639	0	0	0	0	0.129	0.054	0.9	0	0.91
CAND1	RBBP7	4450029	4445322	9606.ENSP00000442318	9606.ENSP00000369424	0	0	0	0	0.121	0	0.9	0.057	0.909
ACTS	PP2AA	4440074	4439716	9606.ENSP00000329117	9606.ENSP00000324804	0	0	0	0	0.061	0	0.9	0.111	0.909
DDOST	RPL18A	4448070	4433211	9606.ENSP00000399457	9606.ENSP00000222247	0	0	0	0	0.134	0	0.9	0	0.909
EIF4B	RPS21	4447567	4441569	9606.ENSP00000388806	9606.ENSP00000345957	0	0	0	0	0.104	0	0.9	0.068	0.909
PSMB3	CDK1	4451799	4446389	9606.ENSP00000483688	9606.ENSP00000378699	0	0	0	0	0.09	0.059	0.9	0.069	0.909
PAK2	PSMD8	4438909	4432854	9606.ENSP00000314067	9606.ENSP00000215071	0	0	0	0	0.1	0.075	0.9	0	0.909
PP2AA	PSME2	4439716	4432984	9606.ENSP00000324804	9606.ENSP00000216802	0	0	0	0	0.125	0	0.9	0	0.908
SNRPN	YBX1	4446975	4443961	9606.ENSP00000382972	9606.ENSP00000361626	0	0	0	0	0.063	0.085	0.9	0.062	0.908
PP2AA	PSMD7	4439716	4433080	9606.ENSP00000324804	9606.ENSP00000219313	0	0	0	0	0.118	0	0.9	0.05	0.908
PSMD3	PSME2	4435463	4432984	9606.ENSP00000264639	9606.ENSP00000216802	0	0	0	0	0.055	0	0.9	0.105	0.908
PGES2	IMPDH1	4441510	4441488	9606.ENSP00000345341	9606.ENSP00000345096	0	0	0	0	0.111	0	0.9	0.056	0.908
PAK2	PSMD3	4438909	4435463	9606.ENSP00000314067	9606.ENSP00000264639	0	0	0	0	0.082	0.074	0.9	0	0.907
PP2AA	CYCS	4439716	4438356	9606.ENSP00000324804	9606.ENSP00000307786	0	0	0	0	0.065	0	0.9	0.088	0.907
RPS9	EIF3J	4437909	4434966	9606.ENSP00000302896	9606.ENSP00000261868	0	0	0	0	0.069	0	0.9	0.087	0.907
PSMB3	RPN2	4451799	4433686	9606.ENSP00000483688	9606.ENSP00000237530	0	0	0	0	0.095	0	0.9	0.058	0.907
PAK2	PSMD7	4438909	4433080	9606.ENSP00000314067	9606.ENSP00000219313	0	0	0	0	0.088	0.054	0.9	0	0.906
PAK2	PSME2	4438909	4432984	9606.ENSP00000314067	9606.ENSP00000216802	0	0	0	0	0.107	0	0.9	0	0.906
RPL5	EIF3J	4443502	4434966	9606.ENSP00000359345	9606.ENSP00000261868	0	0	0	0	0.102	0	0.9	0	0.906
ILF2	FTH1	4442589	4436083	9606.ENSP00000355011	9606.ENSP00000273550	0	0	0	0	0	0	0.9	0.094	0.905
PA2G4	ACLY	4437907	4434323	9606.ENSP00000302886	9606.ENSP00000253792	0	0	0	0	0.09	0	0.9	0	0.905
PLOD2	PLOD3	4436514	4433268	9606.ENSP00000282903	9606.ENSP00000223127	0	0	0	0.965	0.061	0	0.9	0.913	0.905
DDOST	RPS9	4448070	4437909	9606.ENSP00000399457	9606.ENSP00000302896	0	0	0	0	0.091	0	0.9	0	0.905
RPN1	PSMD3	4437255	4435463	9606.ENSP00000296255	9606.ENSP00000264639	0	0	0	0	0.097	0	0.9	0	0.905
DDOST	RPL27A	4448070	4441578	9606.ENSP00000399457	9606.ENSP00000346015	0	0	0	0	0.094	0	0.9	0	0.905
DDOST	RPS21	4448070	4441569	9606.ENSP00000399457	9606.ENSP00000345957	0	0	0	0	0.096	0	0.9	0	0.905
PP2AA	NUCL	4439716	4433937	9606.ENSP00000324804	9606.ENSP00000245544	0	0	0	0	0	0.089	0.9	0	0.905
SRPRB	RPL27A	4448962	4441578	9606.ENSP00000418401	9606.ENSP00000346015	0	0	0	0	0.091	0	0.9	0	0.905
RPL18	RPN2	4450217	4433686	9606.ENSP00000447001	9606.ENSP00000237530	0	0	0	0	0.083	0	0.9	0.05	0.905
ACTS	PSMD5	4440074	4432839	9606.ENSP00000329117	9606.ENSP00000210313	0	0	0	0	0	0	0.9	0.089	0.905
SND1	PEBP1	4441654	4434854	9606.ENSP00000346762	9606.ENSP00000261313	0	0	0	0	0.084	0	0.9	0	0.904
RPL18	EIF3J	4450217	4434966	9606.ENSP00000447001	9606.ENSP00000261868	0	0	0	0	0.068	0	0.9	0.057	0.904
IMPDH1	ACLY	4441488	4434323	9606.ENSP00000345096	9606.ENSP00000253792	0	0	0	0	0.062	0	0.9	0.062	0.904
UCHL3	UBA6	4444906	4438864	9606.ENSP00000366819	9606.ENSP00000313454	0	0	0	0	0.062	0.82	0	0.477	0.904
DDOST	RPL5	4448070	4443502	9606.ENSP00000399457	9606.ENSP00000359345	0	0	0	0	0.063	0	0.9	0.061	0.904
CAND1	FBXO2	4450029	4441603	9606.ENSP00000442318	9606.ENSP00000346240	0	0	0	0	0	0	0.9	0.079	0.904
RPS21	RPN2	4441569	4433686	9606.ENSP00000345957	9606.ENSP00000237530	0	0	0	0	0.072	0	0.9	0.049	0.904
GBA	TCPZ	4438937	4436191	9606.ENSP00000314508	9606.ENSP00000275603	0	0	0	0	0	0	0.9	0.086	0.904
ARF1	TPD52	4449926	4449499	9606.ENSP00000440005	9606.ENSP00000429309	0	0	0	0	0.049	0	0.9	0.077	0.904
PSMD13	CDK1	4447954	4446389	9606.ENSP00000396937	9606.ENSP00000378699	0	0	0	0	0.082	0	0.9	0	0.904
CDK1	PSME2	4446389	4432984	9606.ENSP00000378699	9606.ENSP00000216802	0	0	0	0	0.061	0	0.9	0.064	0.904
FBXO2	FBX22	4441603	4438360	9606.ENSP00000346240	9606.ENSP00000307833	0	0	0	0	0	0	0.9	0.084	0.904
RPL28	DDOST	4450412	4448070	9606.ENSP00000452909	9606.ENSP00000399457	0	0	0	0	0.084	0	0.9	0	0.904
RPS21	EIF3J	4441569	4434966	9606.ENSP00000345957	9606.ENSP00000261868	0	0	0	0	0.082	0	0.9	0	0.904
CARS	RPS9	4445409	4437909	9606.ENSP00000369897	9606.ENSP00000302896	0.167	0	0	0	0.837	0	0	0.343	0.903
SARNP	NUCL	4440807	4433937	9606.ENSP00000337632	9606.ENSP00000245544	0	0	0	0	0.07	0	0.9	0	0.903
RPL28	EIF3J	4450412	4434966	9606.ENSP00000452909	9606.ENSP00000261868	0	0	0	0	0.072	0	0.9	0	0.903
CDK1	PSME1	4446389	4445713	9606.ENSP00000378699	9606.ENSP00000372155	0	0	0	0	0.061	0	0.9	0.05	0.903
LA	CATA	4447403	4446888	9606.ENSP00000386636	9606.ENSP00000382058	0	0	0	0	0.076	0	0.9	0	0.903
TMED7	RAB1B	4448382	4438570	9606.ENSP00000405926	9606.ENSP00000310226	0	0	0	0	0.064	0	0.9	0.05	0.903
EIF3J	RPL18A	4434966	4433211	9606.ENSP00000261868	9606.ENSP00000222247	0	0	0	0	0.069	0	0.9	0	0.903
SRPRB	RPL5	4448962	4443502	9606.ENSP00000418401	9606.ENSP00000359345	0	0	0	0	0.076	0	0.9	0	0.903
FBXO2	UBA6	4441603	4438864	9606.ENSP00000346240	9606.ENSP00000313454	0	0	0	0	0	0	0.9	0.063	0.902
IMPDH1	HEXB	4441488	4434873	9606.ENSP00000345096	9606.ENSP00000261416	0	0	0	0	0.063	0	0.9	0	0.902
RPL5	RPN2	4443502	4433686	9606.ENSP00000359345	9606.ENSP00000237530	0	0	0	0	0.069	0	0.9	0	0.902
RPL30	RPN2	4449429	4433686	9606.ENSP00000428085	9606.ENSP00000237530	0	0	0	0	0.063	0	0.9	0	0.902
UBA6	FBX22	4438864	4438360	9606.ENSP00000313454	9606.ENSP00000307833	0	0	0	0	0.064	0	0.9	0	0.902
ADPGK	GALM	4438764	4436012	9606.ENSP00000312250	9606.ENSP00000272252	0.046	0	0	0	0.061	0	0.9	0	0.902
PSME1	PP2AA	4445713	4439716	9606.ENSP00000372155	9606.ENSP00000324804	0	0	0	0	0.065	0	0.9	0	0.902
ILF2	ALDOC	4442589	4433361	9606.ENSP00000355011	9606.ENSP00000226253	0	0	0	0	0.061	0	0.9	0	0.902
RPL27A	RPN2	4441578	4433686	9606.ENSP00000346015	9606.ENSP00000237530	0	0	0	0	0.063	0	0.9	0	0.902
SNRPN	PTBP1	4446975	4441922	9606.ENSP00000382972	9606.ENSP00000349428	0	0	0	0	0	0	0.9	0.06	0.902
PSME1	ACTS	4445713	4440074	9606.ENSP00000372155	9606.ENSP00000329117	0	0	0	0	0.064	0	0.9	0	0.902
RPL30	DDOST	4449429	4448070	9606.ENSP00000428085	9606.ENSP00000399457	0	0	0	0	0.067	0	0.9	0	0.902
RPL28	RPN2	4450412	4433686	9606.ENSP00000452909	9606.ENSP00000237530	0	0	0	0	0.064	0	0.9	0	0.902
PGES2	PA2G4	4441510	4437907	9606.ENSP00000345341	9606.ENSP00000302886	0	0	0	0	0.064	0	0.9	0	0.902
FBX22	UBE2K	4438360	4434874	9606.ENSP00000307833	9606.ENSP00000261427	0	0	0	0	0.061	0	0.9	0	0.902
UBA5	FBX22	4441844	4438360	9606.ENSP00000348565	9606.ENSP00000307833	0	0	0	0	0.064	0	0.9	0	0.902
THIO	PDXK	4440473	4436919	9606.ENSP00000333664	9606.ENSP00000291565	0	0	0	0	0.061	0	0.9	0.048	0.902
ACTS	PSME2	4440074	4432984	9606.ENSP00000329117	9606.ENSP00000216802	0	0	0	0	0.064	0	0.9	0	0.902
RPS21	RPN1	4441569	4437255	9606.ENSP00000345957	9606.ENSP00000296255	0	0	0	0	0.064	0	0.9	0	0.902
RPS9	RPN1	4437909	4437255	9606.ENSP00000302896	9606.ENSP00000296255	0	0	0	0	0.068	0	0.9	0	0.902
PGES2	ACLY	4441510	4434323	9606.ENSP00000345341	9606.ENSP00000253792	0	0	0	0	0.061	0	0.9	0	0.902
PAK2	PSMD5	4438909	4432839	9606.ENSP00000314067	9606.ENSP00000210313	0	0	0	0	0.069	0	0.9	0	0.902
RPL30	EIF3J	4449429	4434966	9606.ENSP00000428085	9606.ENSP00000261868	0	0	0	0	0.064	0	0.9	0	0.902
PSMD13	PP2AA	4447954	4439716	9606.ENSP00000396937	9606.ENSP00000324804	0	0	0	0	0.064	0	0.9	0	0.902
PGM1	ADPGK	4443663	4438764	9606.ENSP00000360124	9606.ENSP00000312250	0	0	0	0	0.059	0	0.9	0	0.901
PA2G4	HEXB	4437907	4434873	9606.ENSP00000302886	9606.ENSP00000261416	0	0	0	0	0	0	0.9	0.056	0.901
COX2	GPDM	4442560	4438431	9606.ENSP00000354876	9606.ENSP00000308610	0	0	0	0	0.135	0.829	0	0.385	0.901
CDK1	RAB1B	4446389	4438570	9606.ENSP00000378699	9606.ENSP00000310226	0	0	0	0	0	0	0.9	0.057	0.901
UBE2I	FBXO2	4441792	4441603	9606.ENSP00000348056	9606.ENSP00000346240	0	0	0	0	0	0	0.9	0	0.9
PP2AA	PSMD5	4439716	4432839	9606.ENSP00000324804	9606.ENSP00000210313	0	0	0	0	0.047	0	0.9	0	0.9
RPL28	SRPRB	4450412	4448962	9606.ENSP00000452909	9606.ENSP00000418401	0	0	0	0	0.047	0	0.9	0	0.9
GNAI3	HEBP1	4443410	4432597	9606.ENSP00000358867	9606.ENSP00000014930	0	0	0	0	0	0	0.9	0	0.9
HEXB	ACLY	4434873	4434323	9606.ENSP00000261416	9606.ENSP00000253792	0	0	0	0	0	0	0.9	0	0.9
SND1	ATRAP	4441654	4439303	9606.ENSP00000346762	9606.ENSP00000319713	0	0	0	0	0	0	0.9	0	0.9
PSMB3	ACTS	4451799	4440074	9606.ENSP00000483688	9606.ENSP00000329117	0	0	0	0	0	0	0.9	0	0.9
SRPRB	RPL18A	4448962	4433211	9606.ENSP00000418401	9606.ENSP00000222247	0	0	0	0	0.049	0	0.9	0	0.9
PGM1	ILF2	4443663	4442589	9606.ENSP00000360124	9606.ENSP00000355011	0	0	0	0	0	0	0.9	0	0.9
GNAI2	HEBP1	4438833	4432597	9606.ENSP00000312999	9606.ENSP00000014930	0	0	0	0	0	0	0.9	0	0.9
PGM1	FTH1	4443663	4436083	9606.ENSP00000360124	9606.ENSP00000273550	0	0	0	0	0	0	0.9	0.049	0.9
PGES2	HEXB	4441510	4434873	9606.ENSP00000345341	9606.ENSP00000261416	0	0	0	0	0	0	0.9	0	0.9
UBA5	FBXO2	4441844	4441603	9606.ENSP00000348565	9606.ENSP00000346240	0	0	0	0	0	0	0.9	0	0.9
RPS9	RPN2	4437909	4433686	9606.ENSP00000302896	9606.ENSP00000237530	0	0	0	0	0	0	0.9	0	0.9
ILF2	PDXK	4442589	4436919	9606.ENSP00000355011	9606.ENSP00000291565	0	0	0	0	0	0	0.9	0	0.9
SRPRB	RPS21	4448962	4441569	9606.ENSP00000418401	9606.ENSP00000345957	0	0	0	0	0	0	0.9	0	0.9
UBE2N	FBX22	4439045	4438360	9606.ENSP00000316176	9606.ENSP00000307833	0	0	0	0	0.042	0	0.9	0	0.9
SRPRB	RPS9	4448962	4437909	9606.ENSP00000418401	9606.ENSP00000302896	0	0	0	0	0.049	0	0.9	0	0.9
PSMD13	ACTS	4447954	4440074	9606.ENSP00000396937	9606.ENSP00000329117	0	0	0	0	0	0	0.9	0	0.9
ATRAP	PEBP1	4439303	4434854	9606.ENSP00000319713	9606.ENSP00000261313	0	0	0	0	0	0	0.9	0.049	0.9
ACTS	PSMD7	4440074	4433080	9606.ENSP00000329117	9606.ENSP00000219313	0	0	0	0	0	0	0.9	0	0.9
RPL30	SRPRB	4449429	4448962	9606.ENSP00000428085	9606.ENSP00000418401	0	0	0	0	0.042	0	0.9	0	0.9
FBXO2	UBE2N	4441603	4439045	9606.ENSP00000346240	9606.ENSP00000316176	0	0	0	0	0	0	0.9	0	0.9
ILF2	THIO	4442589	4440473	9606.ENSP00000355011	9606.ENSP00000333664	0	0	0	0	0	0	0.9	0	0.9
TPD52	FTH1	4449499	4436083	9606.ENSP00000429309	9606.ENSP00000273550	0	0	0	0	0	0	0.9	0	0.9
ACTS	PSMD8	4440074	4432854	9606.ENSP00000329117	9606.ENSP00000215071	0	0	0	0	0	0	0.9	0	0.9
RPL18	SRPRB	4450217	4448962	9606.ENSP00000447001	9606.ENSP00000418401	0	0	0	0	0.045	0	0.9	0	0.9
PSMD13	PAK2	4447954	4438909	9606.ENSP00000396937	9606.ENSP00000314067	0	0	0	0	0	0	0.9	0	0.9
ACTS	PSMD3	4440074	4435463	9606.ENSP00000329117	9606.ENSP00000264639	0	0	0	0	0	0	0.9	0	0.9
CDC42	NUCL	4446990	4433937	9606.ENSP00000383118	9606.ENSP00000245544	0	0	0	0	0	0	0.9	0	0.9
FBXO2	SAE1	4441603	4435933	9606.ENSP00000346240	9606.ENSP00000270225	0	0	0	0	0	0	0.9	0	0.9
G3BP1	YBX1	4446228	4443961	9606.ENSP00000377681	9606.ENSP00000361626	0	0	0	0	0.264	0.428	0	0.778	0.898
THIO	ACLY	4440473	4434323	9606.ENSP00000333664	9606.ENSP00000253792	0.046	0	0	0	0.078	0	0.8	0.477	0.895
STK26	PP2AA	4446263	4439716	9606.ENSP00000377867	9606.ENSP00000324804	0	0	0	0	0.087	0.86	0	0.224	0.892
HNRNPA1	TNPO1	4441190	4440721	9606.ENSP00000341826	9606.ENSP00000336712	0	0	0	0	0.301	0.579	0	0.652	0.888
TCTP	RPL18	4451239	4450217	9606.ENSP00000477781	9606.ENSP00000447001	0	0	0	0	0.871	0.05	0	0.135	0.885
PSMD13	TXNL1	4447954	4433026	9606.ENSP00000396937	9606.ENSP00000217515	0	0	0	0	0.781	0.219	0	0.377	0.884
RPL5	EIF5A2	4443502	4437196	9606.ENSP00000359345	9606.ENSP00000295822	0	0	0	0	0.635	0.624	0	0.173	0.876
LA	RO60	4447403	4442885	9606.ENSP00000386636	9606.ENSP00000356416	0	0	0	0	0.061	0.379	0	0.805	0.876
DDOST	COX2	4448070	4442560	9606.ENSP00000399457	9606.ENSP00000354876	0	0	0	0	0.069	0.871	0	0	0.874
GSPT1	EIF4B	4448014	4447567	9606.ENSP00000398131	9606.ENSP00000388806	0	0	0	0	0.405	0.579	0	0.538	0.874
CD44	EZR	4448037	4442801	9606.ENSP00000398632	9606.ENSP00000356042	0	0	0	0	0.063	0.421	0	0.782	0.872
RPL27A	PA2G4	4441578	4437907	9606.ENSP00000346015	9606.ENSP00000302886	0.093	0	0	0	0.679	0.553	0	0.118	0.87
PRDX2	PRDX1	4437770	4435133	9606.ENSP00000301522	9606.ENSP00000262746	0	0	0.449	0.979	0.102	0.857	0	0.798	0.869
UCHL3	6PGD	4444906	4435961	9606.ENSP00000366819	9606.ENSP00000270776	0	0	0	0	0.063	0.86	0	0	0.863
STRAP	UBA6	4447735	4438864	9606.ENSP00000392270	9606.ENSP00000313454	0	0	0	0	0.064	0.86	0	0	0.863
PARK7	ANXA7	4448989	4444056	9606.ENSP00000418770	9606.ENSP00000362010	0	0	0	0	0.084	0.828	0	0.204	0.863
EIF3B	PA2G4	4442432	4437907	9606.ENSP00000354125	9606.ENSP00000302886	0	0	0	0	0.848	0.081	0	0.073	0.859
STRAP	CTPS1	4447735	4443980	9606.ENSP00000392270	9606.ENSP00000361704	0	0	0	0	0.161	0.838	0	0	0.858
PGM2	ALDOC	4445627	4433361	9606.ENSP00000371393	9606.ENSP00000226253	0	0	0	0	0.07	0	0.8	0.292	0.857
EIF4G1	G3BP1	4448822	4446228	9606.ENSP00000416255	9606.ENSP00000377681	0	0	0	0	0.211	0.391	0	0.725	0.857
CDC37	AHSA1	4433199	4432965	9606.ENSP00000222005	9606.ENSP00000216479	0	0	0	0	0.067	0.154	0	0.832	0.856
PGM1	6PGD	4443663	4435961	9606.ENSP00000360124	9606.ENSP00000270776	0.113	0	0	0	0.064	0	0	0.841	0.856
NME1	NQO1	4440758	4439310	9606.ENSP00000337060	9606.ENSP00000319788	0	0	0	0	0.09	0.847	0	0	0.854
RHOA	RALA	4448110	4432558	9606.ENSP00000400175	9606.ENSP00000005257	0	0	0.359	0.759	0.093	0.073	0.8	0.518	0.852
EIF4G1	HNRNPD	4448822	4438847	9606.ENSP00000416255	9606.ENSP00000313199	0	0	0	0	0.081	0.454	0	0.719	0.847
DHX15	NSUN2	4440727	4435475	9606.ENSP00000336741	9606.ENSP00000264670	0	0	0	0	0.845	0	0	0.057	0.847
RPL18	PA2G4	4450217	4437907	9606.ENSP00000447001	9606.ENSP00000302886	0	0	0	0	0.621	0.583	0	0.097	0.844
LA	ILF2	4447403	4442589	9606.ENSP00000386636	9606.ENSP00000355011	0	0	0	0	0.792	0	0	0.271	0.842
RPL30	PA2G4	4449429	4437907	9606.ENSP00000428085	9606.ENSP00000302886	0	0	0	0	0.567	0.626	0	0.104	0.842
RPL18	CARS	4450217	4445409	9606.ENSP00000447001	9606.ENSP00000369897	0	0	0	0	0.815	0	0	0.18	0.842
SND1	RPN1	4441654	4437255	9606.ENSP00000346762	9606.ENSP00000296255	0	0	0	0	0.145	0.82	0	0	0.839
RHOA	PLIN3	4448110	4433191	9606.ENSP00000400175	9606.ENSP00000221957	0	0	0	0	0.113	0.819	0	0.08	0.839
P3H1	PLOD1	4433658	4432760	9606.ENSP00000236040	9606.ENSP00000196061	0	0	0	0	0.156	0	0	0.816	0.838
DEK	DHX15	4446658	4440727	9606.ENSP00000380414	9606.ENSP00000336741	0	0	0	0	0.706	0.387	0	0.164	0.836
EIF3B	NSUN2	4442432	4435475	9606.ENSP00000354125	9606.ENSP00000264670	0	0	0	0	0.829	0	0	0.056	0.831
PSMD3	TXNL1	4435463	4433026	9606.ENSP00000264639	9606.ENSP00000217515	0	0	0	0	0.758	0.223	0	0.167	0.829
TSN	CTPS1	4445875	4443980	9606.ENSP00000374332	9606.ENSP00000361704	0	0	0	0	0.092	0.82	0	0	0.829
LA	NAA15	4447403	4437304	9606.ENSP00000386636	9606.ENSP00000296543	0	0	0	0	0.829	0	0	0	0.829
CRTAP	PLOD1	4439628	4432760	9606.ENSP00000323696	9606.ENSP00000196061	0	0	0	0	0.151	0	0	0.805	0.828
SULT1A1	SAE2	4446428	4433986	9606.ENSP00000378972	9606.ENSP00000246548	0	0	0	0	0	0.828	0	0	0.828
G3BP1	EIF3B	4446228	4442432	9606.ENSP00000377681	9606.ENSP00000354125	0	0	0	0	0.277	0.357	0	0.661	0.828
TSN	UBA6	4445875	4438864	9606.ENSP00000374332	9606.ENSP00000313454	0	0	0	0	0.108	0.81	0	0.068	0.828
NME1	PRDX5	4440758	4435610	9606.ENSP00000337060	9606.ENSP00000265462	0	0	0	0	0.145	0.802	0	0.065	0.827
CDK6	CDC37	4435642	4433199	9606.ENSP00000265734	9606.ENSP00000222005	0	0	0	0	0.061	0.621	0	0.551	0.826
RPS9	EIF5A2	4437909	4437196	9606.ENSP00000302896	9606.ENSP00000295822	0.127	0	0	0	0.635	0.413	0	0.166	0.823
STRAP	TSN	4447735	4445875	9606.ENSP00000392270	9606.ENSP00000374332	0	0	0	0	0.116	0.808	0	0	0.823
ADK	CAPG	4436683	4435330	9606.ENSP00000286621	9606.ENSP00000263867	0	0	0	0	0	0.817	0	0.064	0.821
SRPRB	SARNP	4448962	4440807	9606.ENSP00000418401	9606.ENSP00000337632	0	0	0	0	0	0.82	0	0	0.82
BTF3	RPL18A	4445420	4433211	9606.ENSP00000369965	9606.ENSP00000222247	0	0	0	0	0.812	0	0	0.058	0.815
BTF3	RPL27A	4445420	4441578	9606.ENSP00000369965	9606.ENSP00000346015	0	0	0	0	0.813	0	0	0	0.813
BTF3	RPS21	4445420	4441569	9606.ENSP00000369965	9606.ENSP00000345957	0	0	0	0	0.811	0	0	0	0.811
IPO9	RPN2	4442535	4433686	9606.ENSP00000354742	9606.ENSP00000237530	0	0	0	0	0.062	0.806	0	0	0.81
CALU	TPD52	4449856	4449499	9606.ENSP00000438248	9606.ENSP00000429309	0	0	0	0	0.057	0.806	0	0	0.809
TCTP	RPS21	4451239	4441569	9606.ENSP00000477781	9606.ENSP00000345957	0	0	0	0	0.753	0	0	0.254	0.808
P4HA2	PLOD1	4447190	4432760	9606.ENSP00000384999	9606.ENSP00000196061	0	0	0	0	0.308	0	0	0.731	0.806
SRPRB	THIO	4448962	4440473	9606.ENSP00000418401	9606.ENSP00000333664	0	0	0	0	0.064	0.798	0	0	0.802
FPPS	SND1	4441886	4441654	9606.ENSP00000349078	9606.ENSP00000346762	0	0	0	0	0	0	0	0.801	0.801
ADPGK	ALDOC	4438764	4433361	9606.ENSP00000312250	9606.ENSP00000226253	0	0	0	0	0	0	0.8	0	0.8
SULT1A1	UCHL3	4446428	4444906	9606.ENSP00000378972	9606.ENSP00000366819	0	0	0	0	0	0.8	0	0	0.8
ILF3	LA	4448304	4447403	9606.ENSP00000404121	9606.ENSP00000386636	0	0	0	0	0.734	0	0	0.274	0.799
CDK1	UBE2I	4446389	4441792	9606.ENSP00000378699	9606.ENSP00000348056	0	0	0	0	0.146	0.417	0	0.622	0.796
BTF3	RPL5	4445420	4443502	9606.ENSP00000369965	9606.ENSP00000359345	0	0	0	0	0.782	0	0	0.091	0.794
COX2	VDAC1	4442560	4435583	9606.ENSP00000354876	9606.ENSP00000265333	0	0	0	0	0.061	0.363	0	0.681	0.792
CTPS1	UMPS	4443980	4433563	9606.ENSP00000361704	9606.ENSP00000232607	0.214	0	0	0	0.229	0	0	0.681	0.79
PARK7	VPS35	4448989	4437537	9606.ENSP00000418770	9606.ENSP00000299138	0	0	0	0	0.124	0	0	0.77	0.79
PODXL	EZR	4445075	4442801	9606.ENSP00000367817	9606.ENSP00000356042	0	0	0	0	0.061	0	0	0.783	0.788
REEP5	RTN4	4445244	4440824	9606.ENSP00000368959	9606.ENSP00000337838	0	0	0	0	0.085	0.318	0	0.684	0.786
P4HA2	PLOD2	4447190	4436514	9606.ENSP00000384999	9606.ENSP00000282903	0	0	0	0	0.227	0	0	0.732	0.784
UCHL3	EZR	4444906	4442801	9606.ENSP00000366819	9606.ENSP00000356042	0	0	0	0	0	0.783	0	0	0.783
EIF4B	DHX15	4447567	4440727	9606.ENSP00000388806	9606.ENSP00000336741	0	0	0	0	0.674	0.185	0	0.244	0.781
EZR	ARHGDIA	4442801	4435881	9606.ENSP00000356042	9606.ENSP00000269321	0	0	0	0	0.061	0.489	0	0.573	0.777
CARS	RPL18A	4445409	4433211	9606.ENSP00000369897	9606.ENSP00000222247	0	0	0	0	0.731	0	0	0.179	0.769
NAP1L1	IPO9	4451213	4442535	9606.ENSP00000477538	9606.ENSP00000354742	0	0	0	0	0.063	0.594	0	0.439	0.768
ANXA7	VPS35	4444056	4437537	9606.ENSP00000362010	9606.ENSP00000299138	0	0	0	0	0.229	0	0	0.712	0.768
EIF3B	PSMD7	4442432	4433080	9606.ENSP00000354125	9606.ENSP00000219313	0	0	0	0	0.354	0.193	0	0.588	0.766
ILF2	SAE1	4442589	4435933	9606.ENSP00000355011	9606.ENSP00000270225	0	0	0	0	0.766	0	0	0	0.766
RPL28	PA2G4	4450412	4437907	9606.ENSP00000452909	9606.ENSP00000302886	0	0	0	0	0.692	0.244	0	0.077	0.766
ALDH7A1	ADHX	4447473	4437273	9606.ENSP00000387123	9606.ENSP00000296412	0.048	0	0	0	0.065	0	0.65	0.333	0.764
G3BP1	SND1	4446228	4441654	9606.ENSP00000377681	9606.ENSP00000346762	0	0	0	0	0.049	0.379	0	0.633	0.764
RPN2	RCN1	4433686	4432636	9606.ENSP00000237530	9606.ENSP00000054950	0	0	0	0	0.091	0.75	0	0	0.763
PPM1G	SAE2	4441278	4433986	9606.ENSP00000342778	9606.ENSP00000246548	0	0	0	0	0.759	0	0	0	0.759
RPL18	BTF3	4450217	4445420	9606.ENSP00000447001	9606.ENSP00000369965	0	0	0	0	0.759	0	0	0	0.759
SYK	EZR	4444619	4442801	9606.ENSP00000364907	9606.ENSP00000356042	0	0	0	0	0.061	0.063	0	0.747	0.758
CATA	CTPS1	4446888	4443980	9606.ENSP00000382058	9606.ENSP00000361704	0	0	0	0	0.088	0	0.65	0.3	0.757
PGM2	6PGD	4445627	4435961	9606.ENSP00000371393	9606.ENSP00000270776	0	0	0	0	0.126	0	0	0.732	0.756
TCTP	CARS	4451239	4445409	9606.ENSP00000477781	9606.ENSP00000369897	0	0	0	0	0.634	0.322	0	0.09	0.754
6PGD	ACLY	4435961	4434323	9606.ENSP00000270776	9606.ENSP00000253792	0	0	0	0	0.107	0	0	0.732	0.751
ILF2	SNRPD1	4442589	4437667	9606.ENSP00000355011	9606.ENSP00000300413	0	0	0	0	0.747	0	0	0	0.747
CD44	MUC18	4448037	4435364	9606.ENSP00000398632	9606.ENSP00000264036	0	0	0	0	0.052	0	0	0.74	0.744
LA	SNRPD1	4447403	4437667	9606.ENSP00000386636	9606.ENSP00000300413	0	0	0	0	0.632	0	0	0.33	0.742
PAICS	UMPS	4446939	4433563	9606.ENSP00000382595	9606.ENSP00000232607	0.075	0	0	0	0.171	0	0	0.689	0.741
ILF3	DHX15	4448304	4440727	9606.ENSP00000404121	9606.ENSP00000336741	0	0	0	0	0.641	0	0	0.305	0.74
COMT	ADHX	4442480	4437273	9606.ENSP00000354511	9606.ENSP00000296412	0	0	0	0	0	0	0.65	0.282	0.738
RPL27A	HNRNPA1	4441578	4441190	9606.ENSP00000346015	9606.ENSP00000341826	0	0	0	0	0.492	0.402	0	0.194	0.734
HARS	CARS	4449331	4445409	9606.ENSP00000425634	9606.ENSP00000369897	0.045	0	0	0	0.288	0	0	0.639	0.733
UBE2I	ADK	4441792	4436683	9606.ENSP00000348056	9606.ENSP00000286621	0	0	0	0	0	0.733	0	0	0.733
PARK7	PRDX1	4448989	4435133	9606.ENSP00000418770	9606.ENSP00000262746	0.07	0	0	0	0.298	0.157	0	0.566	0.729
CARS	RPL5	4445409	4443502	9606.ENSP00000369897	9606.ENSP00000359345	0.069	0	0	0	0.696	0	0	0.115	0.728
CRTAP	PLOD2	4439628	4436514	9606.ENSP00000323696	9606.ENSP00000282903	0	0	0	0	0.086	0	0	0.712	0.726
RPL27A	EIF5A2	4441578	4437196	9606.ENSP00000346015	9606.ENSP00000295822	0	0	0	0	0.53	0.412	0	0.086	0.725
PLOD2	P3H1	4436514	4433658	9606.ENSP00000282903	9606.ENSP00000236040	0	0	0	0	0.063	0	0	0.717	0.724
DHX15	PA2G4	4440727	4437907	9606.ENSP00000336741	9606.ENSP00000302886	0	0	0	0	0.703	0.064	0	0.081	0.722
CDC42	TPM3	4446990	4443118	9606.ENSP00000383118	9606.ENSP00000357516	0	0	0	0	0.62	0.14	0	0.214	0.72
CDC42	EZR	4446990	4442801	9606.ENSP00000383118	9606.ENSP00000356042	0	0	0	0	0.065	0.064	0	0.704	0.718
CTPS1	RPL5	4443980	4443502	9606.ENSP00000361704	9606.ENSP00000359345	0	0	0	0	0.626	0	0	0.271	0.716
VPS35	RAB11A	4437537	4434975	9606.ENSP00000299138	9606.ENSP00000261890	0	0	0	0	0.118	0.103	0	0.666	0.713
IPO7	NUCL	4445263	4433937	9606.ENSP00000369042	9606.ENSP00000245544	0	0	0	0	0.063	0	0	0.705	0.712
CARS	RPL27A	4445409	4441578	9606.ENSP00000369897	9606.ENSP00000346015	0.059	0	0	0	0.673	0	0	0.127	0.708
CDK1	NASP	4446389	4434413	9606.ENSP00000378699	9606.ENSP00000255120	0	0	0	0	0.568	0.265	0	0.154	0.708
GPX1	PRDX5	4448449	4435610	9606.ENSP00000407375	9606.ENSP00000265462	0	0	0	0	0.091	0.157	0	0.648	0.707
GPX1	PRDX1	4448449	4435133	9606.ENSP00000407375	9606.ENSP00000262746	0	0	0	0	0.062	0.082	0	0.685	0.705
TNPO1	XPO2	4440721	4435176	9606.ENSP00000336712	9606.ENSP00000262982	0	0	0	0	0.151	0	0	0.664	0.703
BTF3	RPS9	4445420	4437909	9606.ENSP00000369965	9606.ENSP00000302896	0	0	0	0	0.702	0	0	0	0.702
ARF1	CDC42	4449926	4446990	9606.ENSP00000440005	9606.ENSP00000383118	0	0	0	0	0.191	0	0	0.642	0.698
MOT1	SAE2	4435673	4433986	9606.ENSP00000265990	9606.ENSP00000246548	0	0	0	0	0.085	0.366	0	0.516	0.695
ARF1	RAB7A	4449926	4435545	9606.ENSP00000440005	9606.ENSP00000265062	0	0	0	0	0.212	0.064	0	0.618	0.694
PAICS	CTPS1	4446939	4443980	9606.ENSP00000382595	9606.ENSP00000361704	0.184	0	0	0	0.418	0	0	0.406	0.693
CTPS1	CMPK1	4443980	4443829	9606.ENSP00000361704	9606.ENSP00000360939	0.06	0	0	0	0.062	0	0	0.68	0.693
SARNP	THIO	4440807	4440473	9606.ENSP00000337632	9606.ENSP00000333664	0	0	0	0	0	0.69	0	0	0.69
PA2G4	TCPZ	4437907	4436191	9606.ENSP00000302886	9606.ENSP00000275603	0.052	0	0	0	0.667	0	0	0.093	0.689
ARF1	RAB2A	4449926	4435120	9606.ENSP00000440005	9606.ENSP00000262646	0	0	0	0	0.107	0.378	0	0.48	0.686
XPO2	SAE2	4435176	4433986	9606.ENSP00000262982	9606.ENSP00000246548	0	0	0	0	0.676	0.067	0	0	0.685
PITPNB	ADK	4439426	4436683	9606.ENSP00000321266	9606.ENSP00000286621	0	0	0	0	0.063	0.665	0	0.072	0.683
PSMB3	SAE2	4451799	4433986	9606.ENSP00000483688	9606.ENSP00000246548	0	0	0	0	0.096	0.519	0	0.331	0.683
SNRPD1	SAE1	4437667	4435933	9606.ENSP00000300413	9606.ENSP00000270225	0	0	0	0	0.675	0	0	0.066	0.683
ILF2	XRCC6	4442589	4442230	9606.ENSP00000355011	9606.ENSP00000352257	0	0	0	0	0.353	0.294	0	0.354	0.679
RPS9	PA2G4	4437909	4437907	9606.ENSP00000302896	9606.ENSP00000302886	0.093	0	0	0	0.61	0	0	0.163	0.678
EIF4G1	VPS35	4448822	4437537	9606.ENSP00000416255	9606.ENSP00000299138	0	0	0	0	0.077	0	0	0.666	0.678
ARHGDIA	RAB11A	4435881	4434975	9606.ENSP00000269321	9606.ENSP00000261890	0	0	0	0	0.173	0.547	0	0.204	0.676
GPX1	NQO1	4448449	4439310	9606.ENSP00000407375	9606.ENSP00000319788	0	0	0	0	0	0	0	0.675	0.675
STRAP	NME1	4447735	4440758	9606.ENSP00000392270	9606.ENSP00000337060	0	0	0	0	0.179	0.342	0	0.445	0.674
UBE2I	MOT1	4441792	4435673	9606.ENSP00000348056	9606.ENSP00000265990	0	0	0	0	0.062	0.366	0	0.496	0.674
PARP1	CYCS	4442743	4438356	9606.ENSP00000355759	9606.ENSP00000307786	0	0	0	0	0.061	0	0	0.665	0.672
EZR	RAB11A	4442801	4434975	9606.ENSP00000356042	9606.ENSP00000261890	0	0	0	0	0.062	0.133	0	0.628	0.672
ANP32A	DEK	4448935	4446658	9606.ENSP00000417864	9606.ENSP00000380414	0	0	0	0	0.17	0	0	0.622	0.672
EIF4B	NSUN2	4447567	4435475	9606.ENSP00000388806	9606.ENSP00000264670	0	0	0	0	0.655	0.073	0	0.055	0.671
P4HA2	PLOD3	4447190	4433268	9606.ENSP00000384999	9606.ENSP00000223127	0	0	0	0	0.172	0	0	0.619	0.671
VAPA	RTN4	4441538	4440824	9606.ENSP00000345656	9606.ENSP00000337838	0	0	0	0	0.096	0.57	0	0.22	0.67
CMPK1	6PGD	4443829	4435961	9606.ENSP00000360939	9606.ENSP00000270776	0	0	0	0	0.081	0	0	0.654	0.668
LA	DHX15	4447403	4440727	9606.ENSP00000386636	9606.ENSP00000336741	0	0	0	0	0.607	0.185	0	0	0.666
NME1	RPL18A	4440758	4433211	9606.ENSP00000337060	9606.ENSP00000222247	0	0	0	0	0.613	0	0	0.173	0.666
CATA	NME1	4446888	4440758	9606.ENSP00000382058	9606.ENSP00000337060	0	0	0	0	0.077	0	0.65	0.049	0.665
UBE2K	SAE2	4434874	4433986	9606.ENSP00000261427	9606.ENSP00000246548	0.044	0	0	0	0.147	0.262	0	0.509	0.665
DEK	SAE2	4446658	4433986	9606.ENSP00000380414	9606.ENSP00000246548	0	0	0	0	0.335	0	0	0.516	0.665
PRDX1	PEBP1	4435133	4434854	9606.ENSP00000262746	9606.ENSP00000261313	0	0	0	0	0.182	0.387	0	0.377	0.66
RPL18	EIF5A2	4450217	4437196	9606.ENSP00000447001	9606.ENSP00000295822	0.059	0	0	0	0.46	0.33	0	0.115	0.658
CNPY3	UMPS	4444037	4433563	9606.ENSP00000361926	9606.ENSP00000232607	0	0	0	0	0	0	0	0.657	0.657
ILF2	DHX15	4442589	4440727	9606.ENSP00000355011	9606.ENSP00000336741	0	0	0	0	0.58	0	0	0.209	0.654
UBE2I	UBA6	4441792	4438864	9606.ENSP00000348056	9606.ENSP00000313454	0.044	0	0	0	0.074	0.262	0	0.533	0.654
EIF4B	PPM1G	4447567	4441278	9606.ENSP00000388806	9606.ENSP00000342778	0	0	0	0	0.646	0	0	0.057	0.652
ILF3	HNRNPD	4448304	4438847	9606.ENSP00000404121	9606.ENSP00000313199	0	0	0	0	0.211	0.071	0	0.562	0.651
CDK1	SAE1	4446389	4435933	9606.ENSP00000378699	9606.ENSP00000270225	0	0	0	0	0.539	0.082	0	0.236	0.648
SULT1A1	COMT	4446428	4442480	9606.ENSP00000378972	9606.ENSP00000354511	0	0	0	0	0	0	0	0.643	0.643
PTGR1	ADHX	4447270	4437273	9606.ENSP00000385763	9606.ENSP00000296412	0	0	0	0	0.078	0.387	0	0.419	0.642
EIF5A2	UMPS	4437196	4433563	9606.ENSP00000295822	9606.ENSP00000232607	0.069	0	0	0	0.065	0	0	0.621	0.641
DFFA	CYCS	4444813	4438356	9606.ENSP00000366237	9606.ENSP00000307786	0	0	0	0	0	0	0	0.641	0.641
ARF1	RALA	4449926	4432558	9606.ENSP00000440005	9606.ENSP00000005257	0	0	0	0	0.103	0.379	0	0.405	0.64
RHOA	PAK2	4448110	4438909	9606.ENSP00000400175	9606.ENSP00000314067	0	0	0	0	0.061	0.308	0	0.491	0.64
TSN	SND1	4445875	4441654	9606.ENSP00000374332	9606.ENSP00000346762	0	0	0	0	0.111	0	0	0.611	0.639
PARK7	GBA	4448989	4438937	9606.ENSP00000418770	9606.ENSP00000314508	0	0	0	0	0.063	0	0	0.629	0.637
EIF4G1	DHX15	4448822	4440727	9606.ENSP00000416255	9606.ENSP00000336741	0	0	0	0	0.553	0	0	0.218	0.636
COX2	RPL18A	4442560	4433211	9606.ENSP00000354876	9606.ENSP00000222247	0	0	0	0	0	0	0	0.636	0.636
ILF3	XRCC6	4448304	4442230	9606.ENSP00000404121	9606.ENSP00000352257	0	0	0	0	0.323	0.294	0	0.298	0.635
PAK2	ARHGDIA	4438909	4435881	9606.ENSP00000314067	9606.ENSP00000269321	0	0	0	0	0.082	0.05	0	0.611	0.632
RPL5	TNPO1	4443502	4440721	9606.ENSP00000359345	9606.ENSP00000336712	0	0	0	0	0.377	0.354	0	0.159	0.632
GSPT1	CARS	4448014	4445409	9606.ENSP00000398131	9606.ENSP00000369897	0	0	0	0	0.266	0.308	0	0.334	0.632
P3H1	PLOD3	4433658	4433268	9606.ENSP00000236040	9606.ENSP00000223127	0	0	0	0	0.157	0	0	0.579	0.631
CYCS	PRDX2	4438356	4437770	9606.ENSP00000307786	9606.ENSP00000301522	0	0	0	0	0.08	0.387	0	0.395	0.629
EIF4B	G3BP1	4447567	4446228	9606.ENSP00000388806	9606.ENSP00000377681	0	0	0	0	0.175	0.243	0	0.451	0.628
ARHGDIA	RALA	4435881	4432558	9606.ENSP00000269321	9606.ENSP00000005257	0	0	0	0	0.061	0.261	0	0.507	0.628
CD44	YBX1	4448037	4443961	9606.ENSP00000398632	9606.ENSP00000361626	0	0	0	0	0	0	0	0.627	0.627
EIF4G1	YBX1	4448822	4443961	9606.ENSP00000416255	9606.ENSP00000361626	0	0	0	0	0.224	0	0	0.538	0.626
TOM40	PSMD7	4448548	4433080	9606.ENSP00000410339	9606.ENSP00000219313	0	0	0	0	0.129	0.363	0	0.381	0.626
PGM1	ADK	4443663	4436683	9606.ENSP00000360124	9606.ENSP00000286621	0	0	0	0	0.05	0.052	0	0.617	0.625
VPS35	PLIN3	4437537	4433191	9606.ENSP00000299138	9606.ENSP00000221957	0	0	0	0	0.072	0	0	0.611	0.624
PSPH	PP2AA	4446410	4439716	9606.ENSP00000378854	9606.ENSP00000324804	0	0	0	0	0	0	0	0.623	0.623
RPL28	BTF3	4450412	4445420	9606.ENSP00000452909	9606.ENSP00000369965	0	0	0	0	0.623	0	0	0	0.623
EZR	PDXK	4442801	4436919	9606.ENSP00000356042	9606.ENSP00000291565	0	0	0	0	0.157	0.416	0	0.292	0.621
PGM2	ADK	4445627	4436683	9606.ENSP00000371393	9606.ENSP00000286621	0.046	0	0	0	0.063	0	0	0.609	0.62
UCHL3	UBE2N	4444906	4439045	9606.ENSP00000366819	9606.ENSP00000316176	0	0	0	0	0.212	0	0	0.535	0.618
CALU	CDK6	4449856	4435642	9606.ENSP00000438248	9606.ENSP00000265734	0	0	0	0	0.101	0	0	0.59	0.616
CTPS1	PA2G4	4443980	4437907	9606.ENSP00000361704	9606.ENSP00000302886	0.046	0	0	0	0.538	0	0	0.198	0.616
REEP5	VAPA	4445244	4441538	9606.ENSP00000368959	9606.ENSP00000345656	0	0	0	0	0.171	0.286	0	0.402	0.615
ARF1	RHOA	4449926	4448110	9606.ENSP00000440005	9606.ENSP00000400175	0	0	0	0	0.177	0	0	0.551	0.615
TOM40	CYCS	4448548	4438356	9606.ENSP00000410339	9606.ENSP00000307786	0	0	0	0	0.192	0	0	0.541	0.614
PSMD7	TXNL1	4433080	4433026	9606.ENSP00000219313	9606.ENSP00000217515	0	0	0	0	0.231	0.454	0	0.151	0.612
XRCC6	HNRNPA1	4442230	4441190	9606.ENSP00000352257	9606.ENSP00000341826	0	0	0	0	0.298	0.274	0	0.295	0.61
TMED7	PA2G4	4448382	4437907	9606.ENSP00000405926	9606.ENSP00000302886	0	0	0	0	0	0.603	0	0.055	0.609
PRDX2	TXNL1	4437770	4433026	9606.ENSP00000301522	9606.ENSP00000217515	0	0	0	0	0.062	0.267	0	0.477	0.609
UBE2N	SAE2	4439045	4433986	9606.ENSP00000316176	9606.ENSP00000246548	0.044	0	0	0	0.104	0.262	0	0.454	0.608
GPX1	PRDX2	4448449	4437770	9606.ENSP00000407375	9606.ENSP00000301522	0	0	0	0	0.061	0.082	0	0.582	0.608
CDK1	XRCC6	4446389	4442230	9606.ENSP00000378699	9606.ENSP00000352257	0	0	0	0	0.107	0.263	0	0.451	0.607
RHOA	CDK1	4448110	4446389	9606.ENSP00000400175	9606.ENSP00000378699	0	0	0	0	0.052	0.095	0	0.579	0.607
EIF3B	TCPZ	4442432	4436191	9606.ENSP00000354125	9606.ENSP00000275603	0	0	0	0	0.596	0	0	0.055	0.602
EIF5A2	RPL18A	4437196	4433211	9606.ENSP00000295822	9606.ENSP00000222247	0	0	0	0	0.429	0.33	0	0	0.601
CDK1	CYCS	4446389	4438356	9606.ENSP00000378699	9606.ENSP00000307786	0	0	0	0	0.095	0	0	0.577	0.601
PAICS	CDK1	4446939	4446389	9606.ENSP00000382595	9606.ENSP00000378699	0	0	0	0	0.538	0.055	0	0.156	0.6
RPL27A	UMPS	4441578	4433563	9606.ENSP00000346015	9606.ENSP00000232607	0	0	0	0	0.349	0	0	0.409	0.599
EIF4G1	CDK1	4448822	4446389	9606.ENSP00000416255	9606.ENSP00000378699	0	0	0	0	0.084	0.085	0	0.559	0.598
YBX1	PA2G4	4443961	4437907	9606.ENSP00000361626	9606.ENSP00000302886	0	0	0	0	0.247	0.377	0	0.212	0.598
RPL30	BTF3	4449429	4445420	9606.ENSP00000428085	9606.ENSP00000369965	0	0	0	0	0.565	0	0	0.113	0.597
RPS9	TCPZ	4437909	4436191	9606.ENSP00000302896	9606.ENSP00000275603	0	0	0	0	0.551	0.053	0	0.127	0.596
PSMB3	UCHL3	4451799	4444906	9606.ENSP00000483688	9606.ENSP00000366819	0	0	0	0	0.371	0	0	0.382	0.595
DDOST	TMED9	4448070	4440219	9606.ENSP00000399457	9606.ENSP00000330945	0	0	0	0	0.547	0.083	0	0.102	0.594
VAPB	REEP5	4448871	4445244	9606.ENSP00000417175	9606.ENSP00000368959	0	0	0	0	0.088	0.286	0	0.425	0.593
NQO1	PRDX1	4439310	4435133	9606.ENSP00000319788	9606.ENSP00000262746	0	0	0	0	0.109	0	0	0.56	0.591
PTBP1	PA2G4	4441922	4437907	9606.ENSP00000349428	9606.ENSP00000302886	0	0	0	0	0.405	0.261	0	0.145	0.591
RPL18	NME1	4450217	4440758	9606.ENSP00000447001	9606.ENSP00000337060	0	0	0	0	0.591	0	0	0	0.591
RPL30	EIF5A2	4449429	4437196	9606.ENSP00000428085	9606.ENSP00000295822	0	0	0	0	0.381	0.367	0	0	0.591
IPO7	PPM1G	4445263	4441278	9606.ENSP00000369042	9606.ENSP00000342778	0	0	0	0	0.081	0.54	0	0.108	0.59
CDK1	PARP1	4446389	4442743	9606.ENSP00000378699	9606.ENSP00000355759	0	0	0	0	0.187	0	0	0.515	0.589
CMPK1	PGM1	4443829	4443663	9606.ENSP00000360939	9606.ENSP00000360124	0	0	0	0	0	0	0	0.586	0.586
YBX1	ILF2	4443961	4442589	9606.ENSP00000361626	9606.ENSP00000355011	0	0	0	0	0.175	0.222	0	0.405	0.584
RPL5	TCPZ	4443502	4436191	9606.ENSP00000359345	9606.ENSP00000275603	0	0	0	0	0.556	0	0	0.099	0.583
IPO7	RPL5	4445263	4443502	9606.ENSP00000369042	9606.ENSP00000359345	0	0	0	0	0.088	0.498	0	0.16	0.582
G3BP1	HNRNPA1	4446228	4441190	9606.ENSP00000377681	9606.ENSP00000341826	0	0	0	0.584	0.199	0.376	0	0.492	0.581
GSPT1	EIF3J	4448014	4434966	9606.ENSP00000398131	9606.ENSP00000261868	0	0	0	0	0.195	0.134	0	0.446	0.58
TCPZ	RPL18A	4436191	4433211	9606.ENSP00000275603	9606.ENSP00000222247	0	0	0	0	0.569	0	0	0.064	0.58
TCTP	PRDX1	4451239	4435133	9606.ENSP00000477781	9606.ENSP00000262746	0	0	0	0	0.064	0	0	0.568	0.579
PAICS	NME1	4446939	4440758	9606.ENSP00000382595	9606.ENSP00000337060	0.044	0	0	0	0.551	0	0	0.095	0.578
PP2AA	XPO2	4439716	4435176	9606.ENSP00000324804	9606.ENSP00000262982	0	0	0	0	0.077	0.059	0	0.553	0.578
PGM2	CMPK1	4445627	4443829	9606.ENSP00000371393	9606.ENSP00000360939	0.042	0	0	0	0.101	0	0	0.549	0.577
GSPT1	EIF3B	4448014	4442432	9606.ENSP00000398131	9606.ENSP00000354125	0	0	0	0	0.503	0.08	0	0.147	0.576
GPX1	CYCS	4448449	4438356	9606.ENSP00000407375	9606.ENSP00000307786	0	0	0	0	0.062	0	0	0.567	0.576
EIF4G1	HNRNPA1	4448822	4441190	9606.ENSP00000416255	9606.ENSP00000341826	0	0	0	0	0.121	0.157	0	0.474	0.576
UCHL3	DCPS	4444906	4435275	9606.ENSP00000366819	9606.ENSP00000263579	0	0.566	0	0	0.061	0	0	0	0.575
COX5A	VDAC1	4439151	4435583	9606.ENSP00000317780	9606.ENSP00000265333	0	0	0	0	0.275	0.057	0	0.429	0.575
NRDC	THOP1	4441665	4438056	9606.ENSP00000346890	9606.ENSP00000304467	0	0	0	0	0.06	0	0	0.565	0.574
CDC42	VAPA	4446990	4441538	9606.ENSP00000383118	9606.ENSP00000345656	0	0	0	0	0.064	0.428	0	0.269	0.574
EIF4G1	LA	4448822	4447403	9606.ENSP00000416255	9606.ENSP00000386636	0	0	0	0	0.173	0.185	0	0.417	0.573
TCPZ	AHSA1	4436191	4432965	9606.ENSP00000275603	9606.ENSP00000216479	0	0	0	0	0.252	0.388	0	0.138	0.571
NQO1	CYCS	4439310	4438356	9606.ENSP00000319788	9606.ENSP00000307786	0	0	0	0	0	0	0	0.57	0.57
PAICS	IMPDH1	4446939	4441488	9606.ENSP00000382595	9606.ENSP00000345096	0.167	0	0	0	0.07	0.077	0	0.466	0.568
TMED7	CMPK1	4448382	4443829	9606.ENSP00000405926	9606.ENSP00000360939	0	0	0	0	0.567	0	0	0	0.567
EIF4B	CTPS1	4447567	4443980	9606.ENSP00000388806	9606.ENSP00000361704	0	0	0	0	0.28	0.413	0	0.057	0.566
TOM40	COX5B	4448548	4434630	9606.ENSP00000410339	9606.ENSP00000258424	0	0	0	0	0.093	0.413	0	0.25	0.566
PDXK	ADK	4436919	4436683	9606.ENSP00000291565	9606.ENSP00000286621	0	0	0	0	0.113	0	0	0.529	0.565
RPL27A	TNPO1	4441578	4440721	9606.ENSP00000346015	9606.ENSP00000336712	0	0	0	0	0.557	0	0	0.053	0.563
CDK1	CDC37	4446389	4433199	9606.ENSP00000378699	9606.ENSP00000222005	0	0	0	0	0	0.507	0	0.148	0.562
GSPT1	NAA15	4448014	4437304	9606.ENSP00000398131	9606.ENSP00000296543	0	0	0	0	0.555	0	0	0.058	0.562
PRDX2	PEBP1	4437770	4434854	9606.ENSP00000301522	9606.ENSP00000261313	0	0	0	0	0.136	0	0	0.514	0.562
ALDH7A1	PNPO	4447473	4433322	9606.ENSP00000387123	9606.ENSP00000225573	0	0	0	0	0.057	0	0	0.554	0.561
ACY1	PGM2	4447101	4445627	9606.ENSP00000384296	9606.ENSP00000371393	0.05	0	0	0	0.061	0.046	0	0.544	0.56
HNRNPA1	PA2G4	4441190	4437907	9606.ENSP00000341826	9606.ENSP00000302886	0	0	0	0	0.478	0.05	0	0.183	0.56
UBE2I	HNRNPA1	4441792	4441190	9606.ENSP00000348056	9606.ENSP00000341826	0	0	0	0	0.12	0.421	0	0.203	0.559
CDC42	RAB1B	4446990	4438570	9606.ENSP00000383118	9606.ENSP00000310226	0	0	0	0.71	0.158	0.463	0	0.248	0.559
RPL18	ILF2	4450217	4442589	9606.ENSP00000447001	9606.ENSP00000355011	0	0	0	0	0.201	0.377	0	0.185	0.559
ILF3	YBX1	4448304	4443961	9606.ENSP00000404121	9606.ENSP00000361626	0	0	0	0	0.179	0.117	0	0.438	0.557
ANXA7	RAB7A	4444056	4435545	9606.ENSP00000362010	9606.ENSP00000265062	0	0	0	0	0.099	0	0	0.528	0.556
MTND	PA2G4	4440474	4437907	9606.ENSP00000333666	9606.ENSP00000302886	0	0	0	0	0	0	0	0.555	0.555
TNPO1	RPS9	4440721	4437909	9606.ENSP00000336712	9606.ENSP00000302896	0	0	0	0	0.421	0.262	0	0	0.554
G3BP1	PTBP1	4446228	4441922	9606.ENSP00000377681	9606.ENSP00000349428	0	0	0	0	0.151	0.14	0	0.437	0.553
PARK7	NME1	4448989	4440758	9606.ENSP00000418770	9606.ENSP00000337060	0.05	0	0	0	0.24	0	0	0.43	0.553
TAPBP	PSME1	4448337	4445713	9606.ENSP00000404833	9606.ENSP00000372155	0	0	0	0	0.119	0	0	0.513	0.552
TCTP	YBX1	4451239	4443961	9606.ENSP00000477781	9606.ENSP00000361626	0	0	0	0	0.213	0	0	0.453	0.551
IMPDH1	ADK	4441488	4436683	9606.ENSP00000345096	9606.ENSP00000286621	0.051	0	0	0	0.061	0	0	0.535	0.55
EIF3B	HNRNPD	4442432	4438847	9606.ENSP00000354125	9606.ENSP00000313199	0	0	0	0	0.088	0	0	0.525	0.549
GSPT1	PAICS	4448014	4446939	9606.ENSP00000398131	9606.ENSP00000382595	0	0	0	0	0.129	0	0	0.504	0.549
G3BP1	THOP1	4446228	4438056	9606.ENSP00000377681	9606.ENSP00000304467	0	0	0	0	0.548	0	0	0	0.548
VAPA	VDAC1	4441538	4435583	9606.ENSP00000345656	9606.ENSP00000265333	0	0	0	0	0.103	0.387	0	0.243	0.547
PAICS	XPO2	4446939	4435176	9606.ENSP00000382595	9606.ENSP00000262982	0	0	0	0	0.543	0	0	0.048	0.547
PEBP1	6PGL	4434854	4434241	9606.ENSP00000261313	9606.ENSP00000252603	0	0	0	0	0.111	0.397	0	0.222	0.546
ADK	UMPS	4436683	4433563	9606.ENSP00000286621	9606.ENSP00000232607	0	0	0	0	0.08	0	0	0.526	0.545
PAICS	PGM2	4446939	4445627	9606.ENSP00000382595	9606.ENSP00000371393	0	0	0	0	0.063	0	0	0.532	0.543
NAP1L1	RBBP4	4451213	4444198	9606.ENSP00000477538	9606.ENSP00000362592	0	0	0	0	0.127	0.388	0	0.213	0.543
PRDX1	TXNL1	4435133	4433026	9606.ENSP00000262746	9606.ENSP00000217515	0	0	0	0	0.062	0.267	0	0.388	0.542
CARS	EIF5A2	4445409	4437196	9606.ENSP00000369897	9606.ENSP00000295822	0	0	0	0	0.386	0	0	0.285	0.542
TMED9	RPN2	4440219	4433686	9606.ENSP00000330945	9606.ENSP00000237530	0	0	0	0	0.501	0.073	0	0.083	0.539
VAPA	PITPNA	4441538	4439084	9606.ENSP00000345656	9606.ENSP00000316809	0	0	0	0	0	0.495	0	0.124	0.538
SNRPN	RO60	4446975	4442885	9606.ENSP00000382972	9606.ENSP00000356416	0	0	0	0	0	0	0	0.537	0.537
GBA	VPS35	4438937	4437537	9606.ENSP00000314508	9606.ENSP00000299138	0	0	0	0	0.059	0	0	0.529	0.537
SND1	TCPZ	4441654	4436191	9606.ENSP00000346762	9606.ENSP00000275603	0	0	0	0	0.305	0.13	0	0.292	0.535
UBE2N	PSMD7	4439045	4433080	9606.ENSP00000316176	9606.ENSP00000219313	0.044	0	0	0	0.345	0.13	0	0.247	0.535
PP2AA	ACLY	4439716	4434323	9606.ENSP00000324804	9606.ENSP00000253792	0	0	0	0	0.068	0.522	0	0.041	0.535
NQO1	FTH1	4439310	4436083	9606.ENSP00000319788	9606.ENSP00000273550	0	0	0	0	0.073	0	0	0.517	0.534
TPM3	PRDX1	4443118	4435133	9606.ENSP00000357516	9606.ENSP00000262746	0	0	0	0	0.062	0.409	0	0.225	0.533
NAP1L1	XPO2	4451213	4435176	9606.ENSP00000477538	9606.ENSP00000262982	0	0	0	0	0.204	0.186	0	0.337	0.533
SNRPN	SAE1	4446975	4435933	9606.ENSP00000382972	9606.ENSP00000270225	0	0	0	0	0.508	0	0	0.09	0.533
PRDX5	PEBP1	4435610	4434854	9606.ENSP00000265462	9606.ENSP00000261313	0	0	0	0	0.076	0.416	0	0.201	0.531
XRCC6	DHX15	4442230	4440727	9606.ENSP00000352257	9606.ENSP00000336741	0	0	0	0	0.452	0	0	0.176	0.53
PARK7	CYCS	4448989	4438356	9606.ENSP00000418770	9606.ENSP00000307786	0.046	0	0	0	0.13	0.076	0	0.456	0.527
FPPS	HNRNPA1	4441886	4441190	9606.ENSP00000349078	9606.ENSP00000341826	0	0	0	0	0.076	0.506	0	0.046	0.527
PARK7	NQO1	4448989	4439310	9606.ENSP00000418770	9606.ENSP00000319788	0.194	0	0	0	0.061	0	0	0.424	0.526
COX5A	PEBP1	4439151	4434854	9606.ENSP00000317780	9606.ENSP00000261313	0	0	0	0	0.103	0	0	0.493	0.526
CDK1	NSUN2	4446389	4435475	9606.ENSP00000378699	9606.ENSP00000264670	0	0	0	0	0.095	0	0	0.497	0.525
GBA	MESD	4438937	4434943	9606.ENSP00000314508	9606.ENSP00000261758	0	0	0	0	0	0	0	0.525	0.525
BTF3	TCPZ	4445420	4436191	9606.ENSP00000369965	9606.ENSP00000275603	0	0	0	0	0.261	0	0	0.383	0.525
PITPNB	PDXK	4439426	4436919	9606.ENSP00000321266	9606.ENSP00000291565	0	0	0	0	0	0	0	0.525	0.525
CDK1	PRDX1	4446389	4435133	9606.ENSP00000378699	9606.ENSP00000262746	0	0	0	0	0.119	0	0	0.48	0.523
CDC42	CDK1	4446990	4446389	9606.ENSP00000383118	9606.ENSP00000378699	0	0	0	0	0.061	0.095	0	0.484	0.523
SGTA	AHSA1	4433173	4432965	9606.ENSP00000221566	9606.ENSP00000216479	0	0	0	0	0.162	0.111	0	0.409	0.522
TOM40	TCPZ	4448548	4436191	9606.ENSP00000410339	9606.ENSP00000275603	0	0	0	0	0.445	0.126	0	0.094	0.522
EIF4B	TCPZ	4447567	4436191	9606.ENSP00000388806	9606.ENSP00000275603	0	0	0	0	0.084	0.491	0	0.057	0.522
PAICS	TCPZ	4446939	4436191	9606.ENSP00000382595	9606.ENSP00000275603	0	0	0	0	0.521	0	0	0	0.521
HNRNPA1	RPS9	4441190	4437909	9606.ENSP00000341826	9606.ENSP00000302896	0	0	0	0	0.267	0.301	0	0.138	0.519
VAPB	RTN4	4448871	4440824	9606.ENSP00000417175	9606.ENSP00000337838	0	0	0	0	0.061	0.291	0	0.335	0.519
CYCS	PRDX5	4438356	4435610	9606.ENSP00000307786	9606.ENSP00000265462	0	0	0	0	0.177	0	0	0.439	0.519
RPL28	TCPZ	4450412	4436191	9606.ENSP00000452909	9606.ENSP00000275603	0	0	0	0	0.518	0	0	0	0.518
ACBP	PEBP1	4439282	4434854	9606.ENSP00000319464	9606.ENSP00000261313	0	0	0	0	0.049	0	0	0.513	0.517
FTH1	PRDX1	4436083	4435133	9606.ENSP00000273550	9606.ENSP00000262746	0.074	0	0	0	0.083	0	0	0.476	0.516
PAICS	RPL27A	4446939	4441578	9606.ENSP00000382595	9606.ENSP00000346015	0	0	0	0	0.35	0	0	0.284	0.515
RPS21	HNRNPA1	4441569	4441190	9606.ENSP00000345957	9606.ENSP00000341826	0	0	0	0	0.367	0.229	0	0.086	0.515
TMED7	BACH	4448382	4444958	9606.ENSP00000405926	9606.ENSP00000367086	0	0	0	0	0	0	0	0.514	0.514
BACH	TMED9	4444958	4440219	9606.ENSP00000367086	9606.ENSP00000330945	0	0	0	0	0	0	0	0.514	0.514
EIF3B	DHX15	4442432	4440727	9606.ENSP00000354125	9606.ENSP00000336741	0	0	0	0	0.497	0	0	0.073	0.513
CYTB	VDAC1	4442489	4435583	9606.ENSP00000354554	9606.ENSP00000265333	0	0	0	0	0	0	0	0.512	0.512
YBX1	RPL5	4443961	4443502	9606.ENSP00000361626	9606.ENSP00000359345	0	0	0	0	0.492	0	0	0.079	0.512
TPD52	RAB11A	4449499	4434975	9606.ENSP00000429309	9606.ENSP00000261890	0	0	0	0	0.058	0	0	0.503	0.511
UBE2N	SAE1	4439045	4435933	9606.ENSP00000316176	9606.ENSP00000270225	0.044	0	0	0	0.101	0.262	0	0.319	0.511
GBA	HEXA	4438937	4435803	9606.ENSP00000314508	9606.ENSP00000268097	0	0	0	0	0.117	0	0	0.468	0.51
RHOA	PARP1	4448110	4442743	9606.ENSP00000400175	9606.ENSP00000355759	0	0	0	0	0	0.19	0	0.421	0.51
COMT	NQO1	4442480	4439310	9606.ENSP00000354511	9606.ENSP00000319788	0	0	0	0	0	0	0	0.51	0.51
HARS	ADK	4449331	4436683	9606.ENSP00000425634	9606.ENSP00000286621	0.074	0	0	0	0.122	0	0	0.444	0.509
LA	TCPZ	4447403	4436191	9606.ENSP00000386636	9606.ENSP00000275603	0	0	0	0	0.507	0	0	0	0.507
TNPO1	RPL18A	4440721	4433211	9606.ENSP00000336712	9606.ENSP00000222247	0	0	0	0	0.503	0	0	0.05	0.507
ILF3	SNRPD1	4448304	4437667	9606.ENSP00000404121	9606.ENSP00000300413	0	0	0	0	0.507	0	0	0	0.507
SARNP	LASP1	4440807	4439747	9606.ENSP00000337632	9606.ENSP00000325240	0	0	0	0	0	0	0	0.505	0.505
HNRNPA1	SARNP	4441190	4440807	9606.ENSP00000341826	9606.ENSP00000337632	0	0	0	0	0.469	0	0	0.104	0.504
UCHL3	UBE2K	4444906	4434874	9606.ENSP00000366819	9606.ENSP00000261427	0	0	0	0	0.222	0	0	0.387	0.503
NAP1L1	IPO7	4451213	4445263	9606.ENSP00000477538	9606.ENSP00000369042	0	0	0	0	0.11	0.102	0	0.427	0.503
PARK7	VDAC1	4448989	4435583	9606.ENSP00000418770	9606.ENSP00000265333	0	0	0	0	0.087	0	0	0.477	0.503
EIF3B	PTBP1	4442432	4441922	9606.ENSP00000354125	9606.ENSP00000349428	0	0	0	0	0.388	0	0	0.221	0.502
HARS	RO60	4449331	4442885	9606.ENSP00000425634	9606.ENSP00000356416	0	0	0	0	0.062	0	0	0.491	0.502
CDK1	PRDX2	4446389	4437770	9606.ENSP00000378699	9606.ENSP00000301522	0	0	0	0	0.06	0.41	0	0.17	0.5
PRDX2	APMAP	4437770	4433025	9606.ENSP00000301522	9606.ENSP00000217456	0.05	0	0	0	0	0	0	0.495	0.5
NAA15	PSMD3	4437304	4435463	9606.ENSP00000296543	9606.ENSP00000264639	0	0	0	0	0.078	0.471	0	0.056	0.5
SULT1A1	NQO1	4446428	4439310	9606.ENSP00000378972	9606.ENSP00000319788	0	0	0	0	0	0	0	0.5	0.5
MTND	UBA6	4440474	4438864	9606.ENSP00000333666	9606.ENSP00000313454	0	0	0	0	0.042	0	0	0.498	0.498
GALM	ALDOC	4436012	4433361	9606.ENSP00000272252	9606.ENSP00000226253	0	0	0	0	0.062	0	0	0.487	0.498
THIO	ALDR	4440473	4438622	9606.ENSP00000333664	9606.ENSP00000310688	0	0	0	0	0.081	0	0	0.476	0.498
ACSL3	THIO	4441998	4440473	9606.ENSP00000350012	9606.ENSP00000333664	0.068	0	0	0	0.169	0	0	0.403	0.497
RPL30	CARS	4449429	4445409	9606.ENSP00000428085	9606.ENSP00000369897	0	0	0	0	0.497	0	0	0	0.497
CDC42	HNRNPA1	4446990	4441190	9606.ENSP00000383118	9606.ENSP00000341826	0	0	0	0	0	0.46	0	0.104	0.496
TSPO	TOM70	4446523	4436581	9606.ENSP00000379563	9606.ENSP00000284320	0	0	0	0	0	0	0	0.495	0.495
EIF4G1	PAK2	4448822	4438909	9606.ENSP00000416255	9606.ENSP00000314067	0	0	0	0	0.079	0.379	0	0.189	0.495
RAB1B	RPN1	4438570	4437255	9606.ENSP00000310226	9606.ENSP00000296255	0	0	0	0	0.134	0.363	0	0.158	0.495
STRAP	TCPZ	4447735	4436191	9606.ENSP00000392270	9606.ENSP00000275603	0	0	0	0	0.485	0	0	0.057	0.493
NAP1L1	SAE2	4451213	4433986	9606.ENSP00000477538	9606.ENSP00000246548	0	0	0	0	0.207	0.387	0	0	0.493
HARS	EIF3B	4449331	4442432	9606.ENSP00000425634	9606.ENSP00000354125	0	0	0	0	0.335	0.194	0	0.13	0.493
TCTP	EIF5A2	4451239	4437196	9606.ENSP00000477781	9606.ENSP00000295822	0	0	0	0	0.253	0	0	0.348	0.492
CYCS	UMPS	4438356	4433563	9606.ENSP00000307786	9606.ENSP00000232607	0	0	0	0	0.145	0	0	0.43	0.492
ANXA7	RAB11A	4444056	4434975	9606.ENSP00000362010	9606.ENSP00000261890	0	0	0	0	0.047	0	0	0.489	0.492
THOP1	SAHH	4438056	4433021	9606.ENSP00000304467	9606.ENSP00000217426	0	0	0	0	0.163	0	0	0.418	0.492
CYCS	TOM70	4438356	4436581	9606.ENSP00000307786	9606.ENSP00000284320	0	0	0	0	0.105	0	0	0.454	0.491
SAE1	UBE2K	4435933	4434874	9606.ENSP00000270225	9606.ENSP00000261427	0.044	0	0	0	0.08	0.262	0	0.307	0.491
NUCB1	GNAI3	4447288	4443410	9606.ENSP00000385923	9606.ENSP00000358867	0	0	0	0	0	0.404	0	0.18	0.491
RHOA	LIMA1	4448110	4446350	9606.ENSP00000400175	9606.ENSP00000378400	0	0	0	0	0.062	0.121	0	0.431	0.49
RPL27A	TCPZ	4441578	4436191	9606.ENSP00000346015	9606.ENSP00000275603	0	0	0	0	0.473	0	0	0.072	0.49
EIF4B	EIF5A2	4447567	4437196	9606.ENSP00000388806	9606.ENSP00000295822	0	0	0	0	0.084	0.186	0	0.37	0.489
EIF3B	PP2AA	4442432	4439716	9606.ENSP00000354125	9606.ENSP00000324804	0	0	0	0	0.324	0	0	0.273	0.488
PTBP1	RPL27A	4441922	4441578	9606.ENSP00000349428	9606.ENSP00000346015	0	0	0	0	0.461	0	0	0.088	0.488
EIF3B	PPM1G	4442432	4441278	9606.ENSP00000354125	9606.ENSP00000342778	0	0	0	0	0.488	0	0	0	0.488
PARK7	GPX1	4448989	4448449	9606.ENSP00000418770	9606.ENSP00000407375	0	0	0	0	0.064	0.186	0	0.38	0.487
PTGR1	PRDX5	4447270	4435610	9606.ENSP00000385763	9606.ENSP00000265462	0	0	0	0	0	0.387	0	0.197	0.487
ARF1	PARP1	4449926	4442743	9606.ENSP00000440005	9606.ENSP00000355759	0	0	0	0	0	0.076	0	0.468	0.487
FTO	NSUN2	4448992	4435475	9606.ENSP00000418823	9606.ENSP00000264670	0	0	0	0	0	0	0	0.487	0.487
RBBP7	SAE1	4445322	4435933	9606.ENSP00000369424	9606.ENSP00000270225	0	0	0	0	0.467	0	0	0.075	0.486
FAM162A	SND1	4449011	4441654	9606.ENSP00000419088	9606.ENSP00000346762	0	0	0	0	0	0	0	0.486	0.486
DHX15	SAE2	4440727	4433986	9606.ENSP00000336741	9606.ENSP00000246548	0	0	0	0	0.481	0	0	0.047	0.485
CYCS	ACLY	4438356	4434323	9606.ENSP00000307786	9606.ENSP00000253792	0	0	0	0	0.064	0	0	0.472	0.485
PGM1	GALM	4443663	4436012	9606.ENSP00000360124	9606.ENSP00000272252	0	0	0	0	0.056	0	0	0.476	0.485
CAND1	IPO9	4450029	4442535	9606.ENSP00000442318	9606.ENSP00000354742	0	0	0	0	0.09	0.457	0	0	0.485
RBBP7	ILF2	4445322	4442589	9606.ENSP00000369424	9606.ENSP00000355011	0	0	0	0	0.475	0	0	0.056	0.484
SYK	UBE2N	4444619	4439045	9606.ENSP00000364907	9606.ENSP00000316176	0	0	0	0	0	0.413	0	0.157	0.484
RBBP4	ILF2	4444198	4442589	9606.ENSP00000362592	9606.ENSP00000355011	0	0	0	0	0.409	0	0	0.162	0.484
CAND1	SAHH	4450029	4433021	9606.ENSP00000442318	9606.ENSP00000217426	0	0	0	0	0.091	0	0	0.455	0.484
YBX1	PPM1G	4443961	4441278	9606.ENSP00000361626	9606.ENSP00000342778	0	0	0	0	0.148	0.294	0	0.21	0.483
LA	SARNP	4447403	4440807	9606.ENSP00000386636	9606.ENSP00000337632	0	0	0	0	0.478	0	0	0.048	0.482
ARHGDIA	ARL3	4435881	4434803	9606.ENSP00000269321	9606.ENSP00000260746	0	0	0	0	0.061	0.261	0	0.314	0.482
VAPB	DDOST	4448871	4448070	9606.ENSP00000417175	9606.ENSP00000399457	0	0	0	0	0.108	0.423	0	0.074	0.482
CDD	MESD	4437785	4434943	9606.ENSP00000301691	9606.ENSP00000261758	0	0	0	0	0	0	0	0.481	0.481
TCPZ	SGTA	4436191	4433173	9606.ENSP00000275603	9606.ENSP00000221566	0	0	0	0	0.45	0	0	0.095	0.481
EZR	LASP1	4442801	4439747	9606.ENSP00000356042	9606.ENSP00000325240	0	0	0	0	0.062	0.288	0	0.285	0.481
NAP1L1	DEK	4451213	4446658	9606.ENSP00000477538	9606.ENSP00000380414	0	0	0	0	0.306	0	0	0.281	0.48
ARF1	RAB14	4449926	4444272	9606.ENSP00000440005	9606.ENSP00000362946	0	0	0	0	0.184	0	0	0.389	0.48
CYCS	PRDX1	4438356	4435133	9606.ENSP00000307786	9606.ENSP00000262746	0	0	0	0	0.12	0	0	0.433	0.48
TPD52	ANXA6	4449499	4441634	9606.ENSP00000429309	9606.ENSP00000346550	0	0	0	0	0	0.379	0	0.196	0.479
ILF3	RPL18A	4448304	4433211	9606.ENSP00000404121	9606.ENSP00000222247	0	0	0	0	0.334	0.22	0	0.079	0.479
RAB1B	PLIN3	4438570	4433191	9606.ENSP00000310226	9606.ENSP00000221957	0	0	0	0	0.063	0.419	0	0.118	0.478
NUCB1	GNAI2	4447288	4438833	9606.ENSP00000385923	9606.ENSP00000312999	0	0	0	0	0.118	0.404	0	0.083	0.476
RAB11A	ARL3	4434975	4434803	9606.ENSP00000261890	9606.ENSP00000260746	0	0	0	0	0.063	0	0	0.463	0.476
DEK	NASP	4446658	4434413	9606.ENSP00000380414	9606.ENSP00000255120	0	0	0	0	0.239	0	0	0.34	0.476
ACSL3	PLIN3	4441998	4433191	9606.ENSP00000350012	9606.ENSP00000221957	0	0	0	0	0	0	0	0.476	0.476
NUCB1	CAB45	4447288	4442319	9606.ENSP00000385923	9606.ENSP00000353094	0	0	0	0	0.175	0	0	0.39	0.476
EIF3B	HNRNPA1	4442432	4441190	9606.ENSP00000354125	9606.ENSP00000341826	0	0	0	0	0.319	0	0	0.26	0.475
PTGR1	NQO1	4447270	4439310	9606.ENSP00000385763	9606.ENSP00000319788	0.045	0	0	0	0.093	0	0	0.442	0.475
HNRNPA1	CBX3	4441190	4440717	9606.ENSP00000341826	9606.ENSP00000336687	0	0	0	0	0.361	0.086	0	0.172	0.474
RPL28	CARS	4450412	4445409	9606.ENSP00000452909	9606.ENSP00000369897	0	0	0	0	0.457	0	0	0.071	0.474
TCPZ	SAHH	4436191	4433021	9606.ENSP00000275603	9606.ENSP00000217426	0	0	0	0	0.428	0	0	0.117	0.474
NME1	ACLY	4440758	4434323	9606.ENSP00000337060	9606.ENSP00000253792	0.071	0	0	0	0.193	0.081	0	0.327	0.474
HARS	RPL5	4449331	4443502	9606.ENSP00000425634	9606.ENSP00000359345	0	0	0	0	0.137	0.379	0	0.096	0.473
TXNL1	RALA	4433026	4432558	9606.ENSP00000217515	9606.ENSP00000005257	0	0	0	0	0.062	0	0	0.462	0.473
RTN4	APMAP	4440824	4433025	9606.ENSP00000337838	9606.ENSP00000217456	0	0	0	0	0	0	0	0.472	0.472
PARP1	HNRNPA1	4442743	4441190	9606.ENSP00000355759	9606.ENSP00000341826	0	0	0	0	0.113	0.172	0	0.338	0.472
IMPDH1	UMPS	4441488	4433563	9606.ENSP00000345096	9606.ENSP00000232607	0.06	0	0	0	0.191	0	0	0.361	0.472
PA2G4	SAHH	4437907	4433021	9606.ENSP00000302886	9606.ENSP00000217426	0	0	0	0	0.434	0	0	0.104	0.472
HNRNPA1	HMBS	4441190	4436303	9606.ENSP00000341826	9606.ENSP00000278715	0	0	0	0	0.133	0.41	0	0.049	0.471
TPD52	EZR	4449499	4442801	9606.ENSP00000429309	9606.ENSP00000356042	0	0	0	0	0	0.413	0	0.136	0.471
UCHL3	ARHGDIA	4444906	4435881	9606.ENSP00000366819	9606.ENSP00000269321	0	0	0	0	0.042	0.445	0	0.085	0.471
HNRNPA1	UBE2K	4441190	4434874	9606.ENSP00000341826	9606.ENSP00000261427	0	0	0	0	0.077	0.415	0	0.095	0.47
BTF3	YBX1	4445420	4443961	9606.ENSP00000369965	9606.ENSP00000361626	0	0	0	0	0.47	0	0	0	0.47
CTPS1	ADK	4443980	4436683	9606.ENSP00000361704	9606.ENSP00000286621	0	0	0	0	0.059	0	0	0.458	0.469
CTPS1	RPL18A	4443980	4433211	9606.ENSP00000361704	9606.ENSP00000222247	0	0	0	0	0.469	0	0	0	0.469
CMPK1	TXNL1	4443829	4433026	9606.ENSP00000360939	9606.ENSP00000217515	0	0	0	0	0.214	0	0	0.352	0.469
EZR	TXNL1	4442801	4433026	9606.ENSP00000356042	9606.ENSP00000217515	0	0	0	0	0.057	0	0	0.459	0.468
EZR	SND1	4442801	4441654	9606.ENSP00000356042	9606.ENSP00000346762	0	0	0	0	0.079	0.181	0	0.351	0.468
TAPBP	PSME2	4448337	4432984	9606.ENSP00000404833	9606.ENSP00000216802	0	0	0	0	0.087	0	0	0.44	0.467
UCHL3	PEBP1	4444906	4434854	9606.ENSP00000366819	9606.ENSP00000261313	0	0	0	0	0	0.467	0	0	0.467
TPM3	EZR	4443118	4442801	9606.ENSP00000357516	9606.ENSP00000356042	0	0	0	0	0.062	0	0	0.455	0.467
SAE1	MOT1	4435933	4435673	9606.ENSP00000270225	9606.ENSP00000265990	0	0	0	0	0.061	0.366	0	0.176	0.466
PGM1	GPDM	4443663	4438431	9606.ENSP00000360124	9606.ENSP00000308610	0	0	0	0	0.116	0	0	0.421	0.466
UBE2I	CDC37	4441792	4433199	9606.ENSP00000348056	9606.ENSP00000222005	0	0	0	0	0.113	0.412	0	0.058	0.466
FPPS	BASP1	4441886	4439274	9606.ENSP00000349078	9606.ENSP00000319281	0	0	0	0	0	0.465	0	0	0.465
LMAN2	RPN2	4437954	4433686	9606.ENSP00000303366	9606.ENSP00000237530	0	0	0	0	0.295	0	0	0.272	0.465
VAPA	XPO2	4441538	4435176	9606.ENSP00000345656	9606.ENSP00000262982	0	0	0	0	0.064	0.262	0	0.287	0.464
PA2G4	UMPS	4437907	4433563	9606.ENSP00000302886	9606.ENSP00000232607	0.051	0	0	0	0.457	0	0	0	0.463
PARK7	TSPO	4448989	4446523	9606.ENSP00000418770	9606.ENSP00000379563	0	0	0	0	0.367	0	0	0.187	0.463
CTPS1	RPS9	4443980	4437909	9606.ENSP00000361704	9606.ENSP00000302896	0.058	0	0	0	0.329	0	0	0.219	0.463
CARS	RPS21	4445409	4441569	9606.ENSP00000369897	9606.ENSP00000345957	0	0	0	0	0.462	0	0	0	0.462
FTH1	BLVRB	4436083	4435245	9606.ENSP00000273550	9606.ENSP00000263368	0	0	0	0	0.113	0	0	0.418	0.462
PA2G4	NSUN2	4437907	4435475	9606.ENSP00000302886	9606.ENSP00000264670	0	0	0	0	0.444	0.064	0	0.05	0.462
ILF2	PA2G4	4442589	4437907	9606.ENSP00000355011	9606.ENSP00000302886	0	0	0	0	0.396	0	0	0.145	0.461
XRCC6	UMPS	4442230	4433563	9606.ENSP00000352257	9606.ENSP00000232607	0	0	0	0	0.073	0	0	0.443	0.461
XRCC6	PTBP1	4442230	4441922	9606.ENSP00000352257	9606.ENSP00000349428	0	0	0	0	0.322	0	0	0.237	0.46
XPO2	NASP	4435176	4434413	9606.ENSP00000262982	9606.ENSP00000255120	0	0	0	0	0.46	0	0	0	0.46
CYCS	CDK6	4438356	4435642	9606.ENSP00000307786	9606.ENSP00000265734	0	0	0	0	0.061	0	0	0.448	0.46
UCHL3	XPO2	4444906	4435176	9606.ENSP00000366819	9606.ENSP00000262982	0	0	0	0	0.155	0.387	0	0	0.46
HMBS	UMPS	4436303	4433563	9606.ENSP00000278715	9606.ENSP00000232607	0	0	0	0	0.083	0.4	0	0.097	0.46
IMPDH1	DHX15	4441488	4440727	9606.ENSP00000345096	9606.ENSP00000336741	0	0	0	0	0.459	0	0	0	0.459
RBBP4	SAE1	4444198	4435933	9606.ENSP00000362592	9606.ENSP00000270225	0	0	0	0	0.435	0	0	0.081	0.459
CTPS1	RPL27A	4443980	4441578	9606.ENSP00000361704	9606.ENSP00000346015	0	0	0	0	0.337	0	0	0.218	0.459
LIMA1	TPM3	4446350	4443118	9606.ENSP00000378400	9606.ENSP00000357516	0	0	0	0	0.086	0.185	0	0.333	0.459
PAICS	CYTB	4446939	4442489	9606.ENSP00000382595	9606.ENSP00000354554	0	0	0	0	0.078	0	0	0.437	0.459
GPDM	ACLY	4438431	4434323	9606.ENSP00000308610	9606.ENSP00000253792	0	0	0	0	0.148	0	0	0.39	0.458
P4HA2	P3H1	4447190	4433658	9606.ENSP00000384999	9606.ENSP00000236040	0	0	0	0	0.062	0	0	0.446	0.458
PGM2	GALM	4445627	4436012	9606.ENSP00000371393	9606.ENSP00000272252	0.077	0	0	0	0.061	0	0	0.425	0.458
ARF1	ARHGDIA	4449926	4435881	9606.ENSP00000440005	9606.ENSP00000269321	0	0	0	0	0.125	0.261	0	0.227	0.457
XPO2	NUCL	4435176	4433937	9606.ENSP00000262982	9606.ENSP00000245544	0	0	0	0	0.235	0.051	0	0.311	0.457
EIF3B	SAHH	4442432	4433021	9606.ENSP00000354125	9606.ENSP00000217426	0	0	0	0	0.428	0	0	0.089	0.457
RPL27A	SAHH	4441578	4433021	9606.ENSP00000346015	9606.ENSP00000217426	0	0	0	0	0.364	0	0	0.179	0.456
TPM3	COX5A	4443118	4439151	9606.ENSP00000357516	9606.ENSP00000317780	0	0	0	0	0.062	0.413	0	0.093	0.456
TMED9	LMAN2	4440219	4437954	9606.ENSP00000330945	9606.ENSP00000303366	0	0	0	0	0.379	0	0	0.16	0.456
REEP5	RAB7A	4445244	4435545	9606.ENSP00000368959	9606.ENSP00000265062	0	0	0	0	0.064	0.269	0	0.269	0.456
CDC42	RAB14	4446990	4444272	9606.ENSP00000383118	9606.ENSP00000362946	0	0	0	0.689	0.088	0.39	0	0.23	0.455
CDK1	FOXK1	4446389	4440045	9606.ENSP00000378699	9606.ENSP00000328720	0	0	0	0	0.065	0.356	0	0.168	0.455
NME1	PEBP1	4440758	4434854	9606.ENSP00000337060	9606.ENSP00000261313	0.043	0	0	0	0.114	0.076	0	0.387	0.455
SNRPN	G3BP1	4446975	4446228	9606.ENSP00000382972	9606.ENSP00000377681	0	0	0	0	0.157	0.381	0	0	0.455
TOM40	CARS	4448548	4445409	9606.ENSP00000410339	9606.ENSP00000369897	0	0	0	0	0.429	0	0	0.086	0.455
TCTP	BTF3	4451239	4445420	9606.ENSP00000477781	9606.ENSP00000369965	0	0	0	0	0.429	0	0	0.083	0.454
DHX15	TCPZ	4440727	4436191	9606.ENSP00000336741	9606.ENSP00000275603	0	0	0	0	0.436	0.05	0	0.064	0.454
EIF3B	PGES2	4442432	4441510	9606.ENSP00000354125	9606.ENSP00000345341	0	0	0	0	0.453	0	0	0	0.453
PP2AA	PRDX1	4439716	4435133	9606.ENSP00000324804	9606.ENSP00000262746	0	0	0	0	0.097	0.393	0	0.082	0.453
ILF3	PA2G4	4448304	4437907	9606.ENSP00000404121	9606.ENSP00000302886	0	0	0	0	0.321	0	0	0.227	0.453
RPS21	PA2G4	4441569	4437907	9606.ENSP00000345957	9606.ENSP00000302886	0	0	0	0	0.412	0	0	0.106	0.452
CD44	CDK6	4448037	4435642	9606.ENSP00000398632	9606.ENSP00000265734	0	0	0	0	0.062	0.167	0	0.355	0.452
RPL30	HNRNPA1	4449429	4441190	9606.ENSP00000428085	9606.ENSP00000341826	0	0	0	0	0.396	0	0	0.13	0.452
PSMB3	UBA6	4451799	4438864	9606.ENSP00000483688	9606.ENSP00000313454	0	0	0	0	0.105	0.057	0	0.402	0.451
PARP1	ANXA6	4442743	4441634	9606.ENSP00000355759	9606.ENSP00000346550	0	0	0	0	0	0	0	0.451	0.451
UCHL3	UBA5	4444906	4441844	9606.ENSP00000366819	9606.ENSP00000348565	0	0	0	0	0.107	0	0	0.409	0.45
ANP32A	XPO2	4448935	4435176	9606.ENSP00000417864	9606.ENSP00000262982	0	0	0	0	0.122	0	0	0.398	0.449
PSMB3	HNRNPD	4451799	4438847	9606.ENSP00000483688	9606.ENSP00000313199	0	0	0	0	0	0.05	0	0.444	0.449
NQO1	GSS	4439310	4432990	9606.ENSP00000319788	9606.ENSP00000216951	0	0	0	0	0.079	0	0	0.426	0.449
PARK7	EIF4G1	4448989	4448822	9606.ENSP00000418770	9606.ENSP00000416255	0	0	0	0	0	0	0	0.449	0.449
NME1	COX5A	4440758	4439151	9606.ENSP00000337060	9606.ENSP00000317780	0	0	0	0	0.297	0	0	0.247	0.448
PAICS	CYCS	4446939	4438356	9606.ENSP00000382595	9606.ENSP00000307786	0	0	0	0	0.132	0	0	0.39	0.448
RAB1B	RPN2	4438570	4433686	9606.ENSP00000310226	9606.ENSP00000237530	0	0	0	0	0.108	0.368	0	0.099	0.448
EIF3B	TNPO1	4442432	4440721	9606.ENSP00000354125	9606.ENSP00000336712	0	0	0	0	0.401	0	0	0.113	0.447
PPM1G	AHSA1	4441278	4432965	9606.ENSP00000342778	9606.ENSP00000216479	0	0	0	0	0.3	0.242	0	0	0.447
COX5B	PSMD7	4434630	4433080	9606.ENSP00000258424	9606.ENSP00000219313	0	0	0	0	0.083	0.413	0	0.056	0.447
FPPS	ACLY	4441886	4434323	9606.ENSP00000349078	9606.ENSP00000253792	0	0	0	0	0.134	0	0	0.387	0.446
ARF1	PAICS	4449926	4446939	9606.ENSP00000440005	9606.ENSP00000382595	0.048	0	0	0	0.064	0.363	0	0.138	0.445
RPS21	EIF5A2	4441569	4437196	9606.ENSP00000345957	9606.ENSP00000295822	0	0	0	0	0.202	0.332	0	0.044	0.445
PARK7	PP2AA	4448989	4439716	9606.ENSP00000418770	9606.ENSP00000324804	0	0	0	0	0.075	0.393	0	0.091	0.445
TMED9	MYDGF	4440219	4435168	9606.ENSP00000330945	9606.ENSP00000262947	0	0	0	0	0.445	0	0	0	0.445
CNPY3	CNPY2	4444037	4436070	9606.ENSP00000361926	9606.ENSP00000273308	0	0	0	0	0	0	0	0.445	0.445
CDC42	UBA6	4446990	4438864	9606.ENSP00000383118	9606.ENSP00000313454	0	0	0	0	0.066	0.08	0	0.406	0.445
CMPK1	ADK	4443829	4436683	9606.ENSP00000360939	9606.ENSP00000286621	0.052	0	0	0	0.093	0	0	0.405	0.444
TXNL1	PSMD8	4433026	4432854	9606.ENSP00000217515	9606.ENSP00000215071	0	0	0	0	0.208	0.219	0	0.173	0.444
XRCC6	NAA15	4442230	4437304	9606.ENSP00000352257	9606.ENSP00000296543	0	0	0	0	0.073	0.379	0	0.112	0.444
NME1	PRDX1	4440758	4435133	9606.ENSP00000337060	9606.ENSP00000262746	0.058	0	0	0	0.317	0	0	0.205	0.444
COMT	RTN4	4442480	4440824	9606.ENSP00000354511	9606.ENSP00000337838	0	0	0	0	0	0	0	0.444	0.444
ANXA7	PEBP1	4444056	4434854	9606.ENSP00000362010	9606.ENSP00000261313	0	0	0	0	0.049	0.056	0	0.43	0.444
FTO	XPO2	4448992	4435176	9606.ENSP00000418823	9606.ENSP00000262982	0	0	0	0	0.063	0	0	0.429	0.443
GPDM	PEBP1	4438431	4434854	9606.ENSP00000308610	9606.ENSP00000261313	0	0	0	0	0.081	0	0	0.419	0.443
CD44	SYK	4448037	4444619	9606.ENSP00000398632	9606.ENSP00000364907	0	0	0	0	0.062	0.057	0	0.421	0.443
PAICS	PRDX2	4446939	4437770	9606.ENSP00000382595	9606.ENSP00000301522	0.111	0	0	0	0.08	0.363	0	0.058	0.443
TOM70	COX5B	4436581	4434630	9606.ENSP00000284320	9606.ENSP00000258424	0	0	0	0	0.059	0.157	0	0.355	0.443
RPN1	TCPZ	4437255	4436191	9606.ENSP00000296255	9606.ENSP00000275603	0	0	0	0	0.112	0.372	0	0.08	0.443
RPL5	UMPS	4443502	4433563	9606.ENSP00000359345	9606.ENSP00000232607	0	0	0	0	0.429	0	0	0.064	0.442
PTGR1	PEBP1	4447270	4434854	9606.ENSP00000385763	9606.ENSP00000261313	0.052	0	0	0	0	0.387	0	0.116	0.441
EZR	6PGD	4442801	4435961	9606.ENSP00000356042	9606.ENSP00000270776	0	0	0	0	0.061	0.429	0	0	0.441
NME1	SAHH	4440758	4433021	9606.ENSP00000337060	9606.ENSP00000217426	0.06	0	0	0	0.359	0	0	0.145	0.44
CTPS1	TCPZ	4443980	4436191	9606.ENSP00000361704	9606.ENSP00000275603	0.054	0	0	0	0.377	0	0	0.127	0.44
TSPO	CYCS	4446523	4438356	9606.ENSP00000379563	9606.ENSP00000307786	0.042	0	0	0	0	0	0	0.44	0.44
MVD	ACLY	4437707	4434323	9606.ENSP00000301012	9606.ENSP00000253792	0	0	0	0	0.064	0	0	0.425	0.439
HARS	PSMD8	4449331	4432854	9606.ENSP00000425634	9606.ENSP00000215071	0	0	0	0	0.387	0	0	0.123	0.439
CDK1	SAE2	4446389	4433986	9606.ENSP00000378699	9606.ENSP00000246548	0	0	0	0	0.158	0.082	0	0.332	0.439
EIF4G1	ILF3	4448822	4448304	9606.ENSP00000416255	9606.ENSP00000404121	0	0	0	0	0.218	0	0	0.311	0.438
PARK7	TOM70	4448989	4436581	9606.ENSP00000418770	9606.ENSP00000284320	0	0	0	0	0.09	0.314	0	0.17	0.437
YBX1	EIF3B	4443961	4442432	9606.ENSP00000361626	9606.ENSP00000354125	0	0	0	0	0.224	0	0	0.304	0.437
HARS	PSMD7	4449331	4433080	9606.ENSP00000425634	9606.ENSP00000219313	0.046	0	0	0	0.425	0.056	0	0	0.437
UCHL3	PSMD7	4444906	4433080	9606.ENSP00000366819	9606.ENSP00000219313	0	0	0	0	0.138	0.084	0	0.344	0.437
STRAP	LA	4447735	4447403	9606.ENSP00000392270	9606.ENSP00000386636	0	0	0	0	0.284	0	0	0.245	0.437
CARS	HMBS	4445409	4436303	9606.ENSP00000369897	9606.ENSP00000278715	0.343	0	0	0	0.152	0	0	0.069	0.436
VAPB	XPO2	4448871	4435176	9606.ENSP00000417175	9606.ENSP00000262982	0	0	0	0	0.064	0.262	0	0.249	0.436
MTND	ALDOC	4440474	4433361	9606.ENSP00000333666	9606.ENSP00000226253	0	0	0	0	0.048	0.419	0	0.063	0.436
CDC42	CDK6	4446990	4435642	9606.ENSP00000383118	9606.ENSP00000265734	0	0	0	0	0	0.095	0	0.402	0.436
TSNAX	XRCC6	4442710	4442230	9606.ENSP00000355599	9606.ENSP00000352257	0	0	0	0	0.046	0	0	0.432	0.435
PTBP1	CBX3	4441922	4440717	9606.ENSP00000349428	9606.ENSP00000336687	0	0	0	0	0.291	0	0	0.237	0.435
PARK7	PEBP1	4448989	4434854	9606.ENSP00000418770	9606.ENSP00000261313	0.082	0	0	0	0.199	0	0	0.293	0.435
RO60	SNRPD1	4442885	4437667	9606.ENSP00000356416	9606.ENSP00000300413	0	0	0	0	0	0	0	0.435	0.435
EIF3B	PSMD8	4442432	4432854	9606.ENSP00000354125	9606.ENSP00000215071	0	0	0	0	0.346	0	0	0.172	0.435
YBX1	RPL27A	4443961	4441578	9606.ENSP00000361626	9606.ENSP00000346015	0	0	0	0	0.327	0.079	0	0.161	0.435
NAP1L1	RPL5	4451213	4443502	9606.ENSP00000477538	9606.ENSP00000359345	0	0	0	0	0.268	0.238	0	0.068	0.435
RPS9	PSMD8	4437909	4432854	9606.ENSP00000302896	9606.ENSP00000215071	0	0	0	0	0.434	0	0	0	0.434
FPPS	SAHH	4441886	4433021	9606.ENSP00000349078	9606.ENSP00000217426	0	0	0	0	0.097	0	0	0.399	0.434
CDC37	PSMD8	4433199	4432854	9606.ENSP00000222005	9606.ENSP00000215071	0	0	0	0	0.416	0	0	0.069	0.433
GALM	6PGD	4436012	4435961	9606.ENSP00000272252	9606.ENSP00000270776	0	0	0	0	0.059	0	0	0.422	0.433
RPN1	VDAC1	4437255	4435583	9606.ENSP00000296255	9606.ENSP00000265333	0	0	0	0	0.061	0.363	0	0.128	0.433
RPL18	CTPS1	4450217	4443980	9606.ENSP00000447001	9606.ENSP00000361704	0	0	0	0	0.241	0	0	0.282	0.433
HNRNPA1	TCPZ	4441190	4436191	9606.ENSP00000341826	9606.ENSP00000275603	0	0	0	0	0.351	0.16	0	0	0.432
CYCS	EIF5A2	4438356	4437196	9606.ENSP00000307786	9606.ENSP00000295822	0.156	0	0	0	0.08	0	0	0.328	0.432
VAPA	RAB7A	4441538	4435545	9606.ENSP00000345656	9606.ENSP00000265062	0	0	0	0	0.063	0	0	0.418	0.432
TMX3	GSS	4437585	4432990	9606.ENSP00000299608	9606.ENSP00000216951	0	0	0	0	0.061	0	0	0.42	0.432
ALDH7A1	PRDX5	4447473	4435610	9606.ENSP00000387123	9606.ENSP00000265462	0	0	0	0	0	0.406	0	0.083	0.432
VAPA	RAB11A	4441538	4434975	9606.ENSP00000345656	9606.ENSP00000261890	0	0	0	0	0.115	0.05	0	0.379	0.432
ACSL3	ALDR	4441998	4438622	9606.ENSP00000350012	9606.ENSP00000310688	0	0	0	0	0.165	0.189	0	0.228	0.431
SRPRB	MYDGF	4448962	4435168	9606.ENSP00000418401	9606.ENSP00000262947	0	0	0	0	0.184	0	0	0.331	0.431
RPL5	HNRNPA1	4443502	4441190	9606.ENSP00000359345	9606.ENSP00000341826	0	0	0	0	0.386	0	0	0.109	0.43
PAICS	ADK	4446939	4436683	9606.ENSP00000382595	9606.ENSP00000286621	0.076	0	0	0	0.159	0	0	0.325	0.43
VDAC1	PRDX1	4435583	4435133	9606.ENSP00000265333	9606.ENSP00000262746	0	0	0	0	0.225	0	0	0.295	0.43
EIF4B	PTBP1	4447567	4441922	9606.ENSP00000388806	9606.ENSP00000349428	0	0	0	0	0.073	0	0	0.41	0.43
HARS	LA	4449331	4447403	9606.ENSP00000425634	9606.ENSP00000386636	0	0	0	0	0.079	0	0	0.407	0.43
6PGD	PRDX1	4435961	4435133	9606.ENSP00000270776	9606.ENSP00000262746	0.114	0	0	0	0.152	0.051	0	0.293	0.429
PSPH	TCPZ	4446410	4436191	9606.ENSP00000378854	9606.ENSP00000275603	0	0	0	0	0.079	0	0	0.405	0.429
RPL27A	PEBP1	4441578	4434854	9606.ENSP00000346015	9606.ENSP00000261313	0	0	0	0	0.171	0.328	0	0.057	0.429
CDK1	RBBP4	4446389	4444198	9606.ENSP00000378699	9606.ENSP00000362592	0	0	0	0	0.297	0	0	0.22	0.428
NSUN2	RPL18A	4435475	4433211	9606.ENSP00000264670	9606.ENSP00000222247	0	0	0	0	0.081	0.261	0	0.226	0.428
CARS	EIF3B	4445409	4442432	9606.ENSP00000369897	9606.ENSP00000354125	0	0	0	0	0.428	0	0	0	0.428
THIO	MVD	4440473	4437707	9606.ENSP00000333664	9606.ENSP00000301012	0.049	0	0	0	0.099	0	0	0.387	0.428
GSPT1	UMPS	4448014	4433563	9606.ENSP00000398131	9606.ENSP00000232607	0	0	0	0	0.077	0	0	0.406	0.428
PTBP1	SARNP	4441922	4440807	9606.ENSP00000349428	9606.ENSP00000337632	0	0	0	0	0.428	0	0	0	0.428
CARS	HNRNPA1	4445409	4441190	9606.ENSP00000369897	9606.ENSP00000341826	0	0	0	0	0.07	0.41	0	0	0.428
RPL30	TNPO1	4449429	4440721	9606.ENSP00000428085	9606.ENSP00000336712	0	0	0	0	0.428	0	0	0	0.428
IPO9	PP2AA	4442535	4439716	9606.ENSP00000354742	9606.ENSP00000324804	0	0	0	0	0.064	0.404	0	0.057	0.428
UBE2I	SARNP	4441792	4440807	9606.ENSP00000348056	9606.ENSP00000337632	0	0	0	0	0.104	0.387	0	0	0.427
ARF1	AHSA1	4449926	4432965	9606.ENSP00000440005	9606.ENSP00000216479	0	0	0	0	0.081	0.376	0	0.081	0.427
MVD	6PGL	4437707	4434241	9606.ENSP00000301012	9606.ENSP00000252603	0	0	0	0	0	0	0	0.427	0.427
ACLY	PLOD3	4434323	4433268	9606.ENSP00000253792	9606.ENSP00000223127	0	0	0	0	0.062	0	0	0.414	0.427
PP2AA	PRDX2	4439716	4437770	9606.ENSP00000324804	9606.ENSP00000301522	0	0	0	0	0.094	0.393	0	0.042	0.427
BTF3	SAHH	4445420	4433021	9606.ENSP00000369965	9606.ENSP00000217426	0	0	0	0	0.212	0	0	0.301	0.426
RPL28	TNPO1	4450412	4440721	9606.ENSP00000452909	9606.ENSP00000336712	0	0	0	0	0.427	0	0	0	0.426
CTPS1	DHX15	4443980	4440727	9606.ENSP00000361704	9606.ENSP00000336741	0	0	0	0	0.425	0	0	0	0.425
ADK	GALM	4436683	4436012	9606.ENSP00000286621	9606.ENSP00000272252	0.217	0	0	0	0.07	0	0	0.274	0.425
LA	CDC37	4447403	4433199	9606.ENSP00000386636	9606.ENSP00000222005	0	0	0	0	0.086	0.397	0	0	0.425
CTPS1	UBA6	4443980	4438864	9606.ENSP00000361704	9606.ENSP00000313454	0	0	0	0	0.062	0.413	0	0	0.425
GSPT1	TCPZ	4448014	4436191	9606.ENSP00000398131	9606.ENSP00000275603	0	0	0.209	0	0.155	0.08	0	0.175	0.425
TNPO1	NUCL	4440721	4433937	9606.ENSP00000336712	9606.ENSP00000245544	0	0	0	0	0.086	0	0	0.397	0.425
ACSL3	ACLY	4441998	4434323	9606.ENSP00000350012	9606.ENSP00000253792	0	0	0	0	0.092	0	0	0.391	0.424
FOXK1	SAE2	4440045	4433986	9606.ENSP00000328720	9606.ENSP00000246548	0	0	0	0	0.084	0.39	0	0.053	0.424
PP2AA	RPN1	4439716	4437255	9606.ENSP00000324804	9606.ENSP00000296255	0	0	0	0	0.133	0.363	0	0	0.424
CDK1	UBE2K	4446389	4434874	9606.ENSP00000378699	9606.ENSP00000261427	0	0	0	0	0.125	0.1	0	0.327	0.424
DIC	RTN4	4450193	4440824	9606.ENSP00000446242	9606.ENSP00000337838	0	0	0	0	0	0.387	0	0.098	0.423
PARK7	PAICS	4448989	4446939	9606.ENSP00000418770	9606.ENSP00000382595	0.129	0	0	0	0.112	0.281	0	0.084	0.423
LA	PA2G4	4447403	4437907	9606.ENSP00000386636	9606.ENSP00000302886	0	0	0	0	0.406	0	0	0.069	0.423
RPL28	PAICS	4450412	4446939	9606.ENSP00000452909	9606.ENSP00000382595	0	0	0	0	0.319	0	0	0.185	0.422
YBX1	COX5A	4443961	4439151	9606.ENSP00000361626	9606.ENSP00000317780	0	0	0	0	0.077	0.4	0	0	0.422
ARHGDIA	ALDOC	4435881	4433361	9606.ENSP00000269321	9606.ENSP00000226253	0	0	0	0	0.066	0.363	0	0.106	0.422
TSNAX	AHSA1	4442710	4432965	9606.ENSP00000355599	9606.ENSP00000216479	0	0	0	0	0	0	0	0.421	0.421
TPD52	UCHL3	4449499	4444906	9606.ENSP00000429309	9606.ENSP00000366819	0	0	0	0	0	0.41	0	0.059	0.421
CMPK1	XPO2	4443829	4435176	9606.ENSP00000360939	9606.ENSP00000262982	0	0	0	0	0.061	0	0	0.409	0.421
XRCC6	CYCS	4442230	4438356	9606.ENSP00000352257	9606.ENSP00000307786	0	0	0	0	0	0	0	0.421	0.421
RAB7A	PLIN3	4435545	4433191	9606.ENSP00000265062	9606.ENSP00000221957	0	0	0	0	0	0	0	0.42	0.42
PSMB3	LASP1	4451799	4439747	9606.ENSP00000483688	9606.ENSP00000325240	0	0	0	0	0.14	0	0	0.354	0.42
PAICS	DHX15	4446939	4440727	9606.ENSP00000382595	9606.ENSP00000336741	0	0	0	0	0.306	0	0	0.197	0.419
TCPZ	PSMD7	4436191	4433080	9606.ENSP00000275603	9606.ENSP00000219313	0	0	0	0	0.265	0	0	0.242	0.419
VDAC1	COX5B	4435583	4434630	9606.ENSP00000265333	9606.ENSP00000258424	0	0	0	0	0.117	0	0	0.369	0.419
LA	RBBP7	4447403	4445322	9606.ENSP00000386636	9606.ENSP00000369424	0	0	0	0	0.419	0	0	0	0.419
DHX15	RPN1	4440727	4437255	9606.ENSP00000336741	9606.ENSP00000296255	0	0	0	0	0.055	0	0	0.411	0.419
CDK1	RPS9	4446389	4437909	9606.ENSP00000378699	9606.ENSP00000302896	0	0	0	0	0.062	0	0	0.405	0.418
LA	YBX1	4447403	4443961	9606.ENSP00000386636	9606.ENSP00000361626	0	0	0	0	0.176	0.192	0	0.195	0.418
PAICS	PSPH	4446939	4446410	9606.ENSP00000382595	9606.ENSP00000378854	0.236	0	0	0	0.096	0.064	0	0.205	0.418
RBBP7	DHX15	4445322	4440727	9606.ENSP00000369424	9606.ENSP00000336741	0	0	0	0	0.407	0	0	0.059	0.418
VAPA	RAB1B	4441538	4438570	9606.ENSP00000345656	9606.ENSP00000310226	0	0	0	0	0.062	0.363	0	0.103	0.417
RPL30	PARK7	4449429	4448989	9606.ENSP00000428085	9606.ENSP00000418770	0	0	0	0	0.201	0.284	0	0.064	0.417
UBE2K	PSMD7	4434874	4433080	9606.ENSP00000261427	9606.ENSP00000219313	0.044	0	0	0	0.098	0.13	0	0.314	0.417
ARHGDIA	TXNL1	4435881	4433026	9606.ENSP00000269321	9606.ENSP00000217515	0	0	0	0	0.045	0	0	0.415	0.417
RPL28	ILF3	4450412	4448304	9606.ENSP00000452909	9606.ENSP00000404121	0	0	0	0	0.291	0	0	0.212	0.417
NME1	TCPZ	4440758	4436191	9606.ENSP00000337060	9606.ENSP00000275603	0	0	0	0	0.388	0	0	0.086	0.417
IPO9	RCN1	4442535	4432636	9606.ENSP00000354742	9606.ENSP00000054950	0	0	0	0	0	0.416	0	0	0.416
IPO7	PEBP1	4445263	4434854	9606.ENSP00000369042	9606.ENSP00000261313	0.046	0	0	0	0.071	0	0	0.394	0.416
PTBP1	TOM70	4441922	4436581	9606.ENSP00000349428	9606.ENSP00000284320	0	0	0	0	0.077	0.393	0	0	0.415
PEBP1	COX5B	4434854	4434630	9606.ENSP00000261313	9606.ENSP00000258424	0	0	0	0	0.132	0	0	0.354	0.415
TCPZ	XPO2	4436191	4435176	9606.ENSP00000275603	9606.ENSP00000262982	0	0	0	0	0.414	0	0	0	0.414
PP2AA	RAB7A	4439716	4435545	9606.ENSP00000324804	9606.ENSP00000265062	0	0	0	0	0.063	0.393	0	0.054	0.414
CD44	CYCS	4448037	4438356	9606.ENSP00000398632	9606.ENSP00000307786	0	0	0	0	0	0	0	0.414	0.414
DDOST	VDAC1	4448070	4435583	9606.ENSP00000399457	9606.ENSP00000265333	0	0	0	0	0.088	0.363	0	0.073	0.414
IPO7	XPO2	4445263	4435176	9606.ENSP00000369042	9606.ENSP00000262982	0	0	0	0.552	0.155	0.083	0	0.626	0.413
PRDX2	ALDOC	4437770	4433361	9606.ENSP00000301522	9606.ENSP00000226253	0	0	0	0	0.063	0.05	0	0.393	0.413
PARK7	COX5B	4448989	4434630	9606.ENSP00000418770	9606.ENSP00000258424	0	0	0	0	0.352	0	0	0.131	0.413
COX2	RAB1B	4442560	4438570	9606.ENSP00000354876	9606.ENSP00000310226	0	0	0	0	0.061	0.4	0	0	0.413
PAICS	SAHH	4446939	4433021	9606.ENSP00000382595	9606.ENSP00000217426	0	0	0	0	0.355	0	0	0.128	0.413
PTGR1	ADK	4447270	4436683	9606.ENSP00000385763	9606.ENSP00000286621	0	0	0	0	0.062	0.4	0	0	0.413
UBE2I	PA2G4	4441792	4437907	9606.ENSP00000348056	9606.ENSP00000302886	0	0	0	0	0.12	0.354	0	0.05	0.413
MVD	RPN1	4437707	4437255	9606.ENSP00000301012	9606.ENSP00000296255	0	0	0	0	0	0	0	0.413	0.413
STRAP	PDXK	4447735	4436919	9606.ENSP00000392270	9606.ENSP00000291565	0	0	0	0	0	0	0	0.412	0.412
ATRAP	PLOD1	4439303	4432760	9606.ENSP00000319713	9606.ENSP00000196061	0	0	0	0	0	0	0	0.412	0.412
IPO9	AHSA1	4442535	4432965	9606.ENSP00000354742	9606.ENSP00000216479	0	0.398	0	0	0.062	0	0	0	0.411
ANXA7	EZR	4444056	4442801	9606.ENSP00000362010	9606.ENSP00000356042	0	0	0	0	0.082	0	0	0.384	0.411
PAICS	RPS9	4446939	4437909	9606.ENSP00000382595	9606.ENSP00000302896	0	0	0	0	0.308	0	0	0.184	0.411
SULT1A1	RCN1	4446428	4432636	9606.ENSP00000378972	9606.ENSP00000054950	0	0	0	0	0	0.387	0	0.08	0.411
LMAN2	RPN1	4437954	4437255	9606.ENSP00000303366	9606.ENSP00000296255	0	0	0	0	0.207	0	0	0.287	0.411
SARNP	SNRPD1	4440807	4437667	9606.ENSP00000337632	9606.ENSP00000300413	0	0	0	0	0.375	0	0	0.095	0.41
TNPO1	TCPZ	4440721	4436191	9606.ENSP00000336712	9606.ENSP00000275603	0	0	0	0	0.409	0	0	0	0.409
RPL18	PARK7	4450217	4448989	9606.ENSP00000447001	9606.ENSP00000418770	0	0	0	0	0.144	0.284	0	0.112	0.408
CAND1	PP2AA	4450029	4439716	9606.ENSP00000442318	9606.ENSP00000324804	0	0	0	0	0.25	0	0	0.243	0.408
CDC42	PODXL	4446990	4445075	9606.ENSP00000383118	9606.ENSP00000367817	0	0	0	0	0	0	0	0.407	0.407
TOM40	NME1	4448548	4440758	9606.ENSP00000410339	9606.ENSP00000337060	0	0	0	0	0.138	0.133	0	0.27	0.407
TMED7	LA	4448382	4447403	9606.ENSP00000405926	9606.ENSP00000386636	0	0	0	0	0.077	0	0	0.383	0.407
ARHGDIA	RAB2A	4435881	4435120	9606.ENSP00000269321	9606.ENSP00000262646	0	0	0	0	0.129	0.261	0	0.152	0.407
CTPS1	EIF3B	4443980	4442432	9606.ENSP00000361704	9606.ENSP00000354125	0	0	0	0	0.407	0	0	0	0.407
VAPB	COX5B	4448871	4434630	9606.ENSP00000417175	9606.ENSP00000258424	0	0	0	0	0.056	0.397	0	0	0.406
PODXL	RAB11A	4445075	4434975	9606.ENSP00000367817	9606.ENSP00000261890	0	0	0	0	0.046	0	0	0.403	0.406
ANP32A	PLIN3	4448935	4433191	9606.ENSP00000417864	9606.ENSP00000221957	0	0	0	0	0.046	0.14	0	0.334	0.406
ARF1	VPS35	4449926	4437537	9606.ENSP00000440005	9606.ENSP00000299138	0	0	0	0	0.142	0.103	0	0.289	0.405
CD44	GBA	4448037	4438937	9606.ENSP00000398632	9606.ENSP00000314508	0	0	0	0	0	0	0	0.404	0.404
CAND1	MOT1	4450029	4435673	9606.ENSP00000442318	9606.ENSP00000265990	0	0	0	0	0.174	0	0	0.307	0.404
PPM1G	THOP1	4441278	4438056	9606.ENSP00000342778	9606.ENSP00000304467	0.044	0	0	0	0.065	0.387	0	0	0.404
CDK1	RALA	4446389	4432558	9606.ENSP00000378699	9606.ENSP00000005257	0	0	0	0	0	0.158	0	0.321	0.404
UBE2I	ARHGDIA	4441792	4435881	9606.ENSP00000348056	9606.ENSP00000269321	0	0	0	0	0.073	0.313	0	0.14	0.404
TCPZ	PSMD8	4436191	4432854	9606.ENSP00000275603	9606.ENSP00000215071	0	0	0	0	0.27	0	0	0.216	0.403
UBE2N	CYCS	4439045	4438356	9606.ENSP00000316176	9606.ENSP00000307786	0	0	0	0	0.156	0.131	0	0.251	0.403
EZR	EIF5A2	4442801	4437196	9606.ENSP00000356042	9606.ENSP00000295822	0	0	0	0	0	0.403	0	0	0.403
RO60	ILF2	4442885	4442589	9606.ENSP00000356416	9606.ENSP00000355011	0	0	0	0	0	0	0	0.403	0.403
EIF4B	PAK2	4447567	4438909	9606.ENSP00000388806	9606.ENSP00000314067	0	0	0	0	0	0.388	0	0.065	0.403
EIF4B	LASP1	4447567	4439747	9606.ENSP00000388806	9606.ENSP00000325240	0	0	0	0	0	0.403	0	0	0.403
PARK7	RBBP4	4448989	4444198	9606.ENSP00000418770	9606.ENSP00000362592	0	0	0	0	0	0.348	0	0.121	0.402
TCTP	SAHH	4451239	4433021	9606.ENSP00000477781	9606.ENSP00000217426	0	0	0	0	0.142	0	0	0.332	0.402
HNRNPA1	RPL18A	4441190	4433211	9606.ENSP00000341826	9606.ENSP00000222247	0	0	0	0	0.361	0.064	0	0.08	0.402
ACLY	6PGL	4434323	4434241	9606.ENSP00000253792	9606.ENSP00000252603	0	0	0	0	0.063	0	0	0.388	0.402
TSPO	PA2G4	4446523	4437907	9606.ENSP00000379563	9606.ENSP00000302886	0	0	0	0	0	0	0	0.402	0.402
CDK1	XPO2	4446389	4435176	9606.ENSP00000378699	9606.ENSP00000262982	0	0	0	0	0.395	0	0	0.053	0.402
PARK7	COMT	4448989	4442480	9606.ENSP00000418770	9606.ENSP00000354511	0.102	0	0	0	0.112	0	0	0.311	0.402
TCTP	CTPS1	4451239	4443980	9606.ENSP00000477781	9606.ENSP00000361704	0	0	0	0	0.245	0	0	0.24	0.402
DFFA	NME1	4444813	4440758	9606.ENSP00000366237	9606.ENSP00000337060	0	0	0	0	0.065	0	0	0.387	0.402
XPO2	TXNL1	4435176	4433026	9606.ENSP00000262982	9606.ENSP00000217515	0	0	0	0	0.064	0.387	0	0	0.401
PAICS	APMAP	4446939	4433025	9606.ENSP00000382595	9606.ENSP00000217456	0.205	0	0	0	0	0	0	0.277	0.4
CD44	NME1	4448037	4440758	9606.ENSP00000398632	9606.ENSP00000337060	0	0	0	0	0	0	0	0.4	0.4
G3BP1	TNPO1	4446228	4440721	9606.ENSP00000377681	9606.ENSP00000336712	0	0	0	0	0.199	0.118	0	0.219	0.4
CARS	TCPZ	4445409	4436191	9606.ENSP00000369897	9606.ENSP00000275603	0	0	0	0	0.309	0	0	0.167	0.4
ANXA6	RAB11A	4441634	4434975	9606.ENSP00000346550	9606.ENSP00000261890	0	0	0	0	0	0	0	0.4	0.4
PRDX1	DNPH1	4435133	4433502	9606.ENSP00000262746	9606.ENSP00000230431	0	0	0	0	0.062	0.387	0	0	0.4
VAPB	PSMD8	4448871	4432854	9606.ENSP00000417175	9606.ENSP00000215071	0	0	0	0	0.108	0.355	0	0	0.4
VAPA	PSMD8	4441538	4432854	9606.ENSP00000345656	9606.ENSP00000215071	0	0	0	0	0.108	0.355	0	0	0.4
ADK	6PGD	4436683	4435961	9606.ENSP00000286621	9606.ENSP00000270776	0.111	0	0	0	0.062	0	0	0.339	0.4
EIF3B	PSMD3	4442432	4435463	9606.ENSP00000354125	9606.ENSP00000264639	0	0	0	0	0.27	0	0	0.212	0.4
ANP32A	TNPO1	4448935	4440721	9606.ENSP00000417864	9606.ENSP00000336712	0	0	0	0	0.108	0	0	0.355	0.4
TCTP	XRCC6	4451239	4442230	9606.ENSP00000477781	9606.ENSP00000352257	0	0	0	0	0.059	0.32	0	0.138	0.4
